# Supplementary material for: Insight Into the Causative Genes and Pathways Associated With Height, Length, Length to Height Ratio and Body Weight Traits of Korean Indigenous Breed, Jindo Dog Using Gene Set Enrichment and Pathway-based GWAS Analysis
Source: Research Square preprint supplement (doi:10.21203/rs.3.rs-738677/v1), 2021-07-26
Supplement: Supplementary file 1 [file f281870fd1508d1f07520db6.xlsx]

## Sheet: Height
Table S1. List of all SNPs (p < 0.01) associated with height that were used for gene set and pathway analysis
Chr	SNP	Position (bp)	A1	A2	Freq		p-value	Official gene name	Location
15	TIGRP2P201033_rs9187576	43493060	A	G	0.106628	6.82776	1.48677e-07	HHIP	intron_variant
3	BICF2G630358507	91180492	A	G	0.471182	6.16031	6.91339e-07	LCORL	intron_variant
3	BICF2G630358640	91314456	G	C	0.333815	5.67699	2.10381e-06	NCAPG	intron_variant
4	BICF2S23724992	23625990	A	G	0.103746	5.39809	3.99861e-06	P4HA1	intron_variant
3	BICF2S2377250	93890772	A	G	0.112392	5.17718	6.65e-06	0	0
31	BICF2S2366810	40675954	C	A	0.254086	5.04769	8.96e-06	0	0
23	BICF2P580549	49471629	A	G	0.269452	4.67366	2.12e-05	PLCH1	intron_variant
3	BICF2G630361903	94287447	A	G	0.153458	4.53313	2.93e-05	0	0
4	BICF2P1252604	17228068	A	G	0.158501	4.43771	3.65e-05	REEP3-CTNNA3	intergenic_region
6	BICF2G630810040	10561492	T	A	0.0482709	4.40894	3.9e-05	TRRAP	intron_variant
4	BICF2P373715	17256830	A	G	0.137608	4.20971	6.17e-05	REEP3-CTNNA3	intergenic_region
4	TIGRP2P62485_rs8997727	53835202	A	G	0.319164	4.20901	6.18e-05	SGCD-ENSCAFG00000030235	intergenic_region
28	BICF2G630269023	24874642	A	G	0.365274	4.07314	8.45e-05	NHLRC2-ADRB1	intergenic_region
8	BICF2S23021338	21059198	G	A	0.135447	4.06702	8.57e-05	LRFN5-U6	intergenic_region
21	BICF2P1267318	9687802	G	A	0.19562	4.00966	9.78e-05	ENSCAFG00000025134-SNORA72	intergenic_region
7	BICF2P321194	77744350	A	C	0.476225	3.94398	0.000113768	TUBB6	intron_variant
20	G1111f23S75	44421872	G	A	0.261527	3.92375	0.000119193	KLHL26	intron_variant
4	BICF2S23752603	78594943	A	G	0.42147	3.90885	0.000123352	U6-CDH9	intergenic_region
5	BICF2P297927	32068916	A	G	0.143372	3.89058	0.000128652	SLC16A11	upstream_gene_variant
24	BICF2S23414107	13547482	A	G	0.349424	3.87153	0.000134421	PLCB1	intron_variant
35	BICF2G630778876	25711203	G	A	0.17316	3.83775	0.000145295	SCAND3	intron_variant
38	BICF2S23158466	26256207	G	A	0.384726	3.80139	0.000157984	0	0
36	TIGRP2P416375_rs8621264	6333278	A	G	0.488473	3.79202	0.000161429	RBMS1-TANK	intergenic_region
22	BICF2S23323434	25111440	G	A	0.192363	3.76242	0.000172813	ENSCAFG00000004977-DACH1	intergenic_region
14	BICF2G630528861	41930890	A	G	0.115994	3.76022	0.000173692	CREB5-ENSCAFG00000003014	intergenic_region
9	BICF2S23741495	43303864	A	G	0.301153	3.74432	0.000180167	MYO18A	intron_variant
8	TIGRP2P108696_rs8628781	21037579	G	A	0.235591	3.7178	0.000191515	LRFN5-U6	intergenic_region
28	BICF2P248390	23293899	C	G	0.402738	3.70938	0.000195262	GPAM	intron_variant
28	BICF2P866757	23299686	G	A	0.402738	3.70938	0.000195262	GPAM	upstream_gene_variant
19	BICF2G63037002	14012257	G	A	0.117605	3.70729	0.000196207	U6-ENSCAFG00000003946	intergenic_region
3	BICF2P261621	69111456	A	G	0.138329	3.70384	0.000197768	CLNK-ZNF518B	intergenic_region
11	BICF2P376563	58260706	A	G	0.215729	3.6909	0.000203751	RNF20	intron_variant
30	BICF2G630409800	12322029	A	G	0.391053	3.68726	0.000205466	SQRDL-7SK	intergenic_region
4	BICF2P1401401	90890804	G	A	0.113833	3.65637	0.000220612	0	0
4	BICF2P42838	49249475	G	A	0.112392	3.65072	0.000223502	GABRA6-GABRB2	intergenic_region
24	BICF2S23414628	13543963	A	G	0.345821	3.59606	0.00025348	PLCB1	intron_variant
21	TIGRP2P290147_rs8748713	9695487	A	G	0.0951009	3.57918	0.000263522	ENSCAFG00000025134-SNORA72	intergenic_region
3	BICF2G630361800	94163416	C	A	0.162104	3.56811	0.000270328	0	0
15	BICF2P264795	19200741	A	C	0.273055	3.55945	0.00027577	NAP1L1-BBS10	intergenic_region
3	BICF2G630340128	44622942	A	G	0.326369	3.55323	0.000279749	ENSCAFG00000026734	downstream_gene_variant
14	BICF2G630521373	14016497	G	A	0.103746	3.55103	0.00028117	DBF4	missense_variant
25	BICF2S23022712	42673914	A	G	0.402017	3.52445	0.000298918	ENSCAFG00000031923-CAB39	intergenic_region
1	BICF2P448058	68268724	G	A	0.0497118	3.51709	0.000304028	ARHGAP18-L3MBTL3	intergenic_region
5	BICF2P645758	15006237	A	G	0.135447	3.494	0.000320625	DDX6	intron_variant
14	BICF2S2333582	13930871	G	A	0.0778098	3.49339	0.000321081	SLC25A40	3_prime_UTR_variant
4	BICF2P445832	36650040	G	A	0.236311	3.48612	0.000326495	UNC5A-TSPAN17	intergenic_region
15	TIGRP2P196415_rs8995196	19120040	A	C	0.171717	3.48417	0.000327969	ENSCAFG00000005683-PHLDA1	intergenic_region
6	BICF2P74125	15182037	G	A	0.0716353	3.46952	0.00033922	MAD1L1	intron_variant
6	BICF2G630810069	10636139	A	G	0.135447	3.46706	0.000341149	TRRAP	upstream_gene_variant
18	BICF2S24412094	7992883	G	A	0.305476	3.46566	0.000342244	GLI3	intron_variant
11	BICF2S23229447	46819643	A	G	0.154179	3.46293	0.000344405	cfa-mir-876	upstream_gene_variant
13	BICF2S23138137	42302989	A	G	0.306196	3.4562	0.000349785	GABRG1-GABRA2	intergenic_region
13	BICF2P163461	42310177	G	A	0.306196	3.4562	0.000349785	GABRG1-GABRA2	intergenic_region
33	BICF2G630249552	13230714	C	A	0.30303	3.45151	0.000353582	BBX-CD47	intergenic_region
11	BICF2G630301668	60082577	A	G	0.111671	3.44969	0.000355064	5S_rRNA-SMC2	intergenic_region
17	BICF2P1181417	48614530	A	G	0.329251	3.44049	0.000362671	AUP1	synonymous_variant
5	BICF2S2329683	15842557	A	C	0.154179	3.4402	0.000362913	FXYD2-ENSCAFG00000029861	intergenic_region
5	BICF2P127170	16440753	A	G	0.334055	3.42824	0.000373048	PAFAH1B2	intron_variant
3	TIGRP2P46301_rs8960321	56022284	A	G	0.0864553	3.4229	0.000377657	MEX3B-TMC3	intergenic_region
3	BICF2G630340127	44615782	A	G	0.263689	3.40663	0.000392074	NR2F2-ENSCAFG00000026734	intergenic_region
10	BICF2S23053016	11017208	G	A	0.350144	3.39496	0.000402754	CPM-CPSF6	intergenic_region
20	BICF2P850355	21597414	A	G	0.150805	3.39301	0.000404563	ENSCAFG00000030627	intron_variant
1	BICF2P1035315	90591406	C	A	0.0893372	3.37284	0.0004238	ENSCAFG00000001991-SMARCA2	intergenic_region
19	BICF2G63047454	28936157	A	G	0.0691643	3.34478	0.000452083	TFCP2L1-7SK	intergenic_region
6	TIGRP2P78394_rs8651698	13058575	A	G	0.0965418	3.34189	0.000455101	FOXK1-SDK1	intergenic_region
4	TIGRP2P62484_rs8640895	53809210	G	A	0.335735	3.33826	0.000458924	SGCD-ENSCAFG00000030235	intergenic_region
21	BICF2G630659178	7329245	G	A	0.111671	3.33812	0.000459076	CCDC67	intron_variant
6	BICF2P97144	8675095	T	A	0.0634006	3.32264	0.000475733	MOGAT3	5_prime_UTR_variant
15	BICF2S22910375	66468536	G	A	0.191643	3.32156	0.000476919	0	0
21	BICF2P1326493	13686673	A	G	0.262968	3.31492	0.000484256	SYTL2	upstream_gene_variant
12	BICF2S23519255	12725009	A	G	0.490607	3.31466	0.000484552	AARS2-U6	intergenic_region
34	BICF2G630461555	22633636	A	C	0.0943252	3.3091	0.0004908	IL1RAP-GMNC	intergenic_region
15	BICF2G630439297	22897075	A	G	0.268939	3.30742	0.000492702	PTPRQ	downstream_gene_variant
11	BICF2G630301690	60105602	A	G	0.113833	3.29199	0.00051052	SMC2	intron_variant
17	BICF2G630205031	48684216	A	C	0.386067	3.29058	0.000512179	RTKN	upstream_gene_variant
15	BICF2S23535762	27618470	A	C	0.21902	3.28956	0.00051338	MGAT4C-ENSCAFG00000031591	intergenic_region
23	BICF2S23411957	49594860	A	G	0.349928	3.28692	0.000516506	GMPS	splice_region_variant&intron_variant
7	BICF2P979272	21586876	A	G	0.367965	3.26209	0.0005469	RASAL2	intron_variant
15	TIGRP2P197092_rs9150502	20687831	A	G	0.201009	3.25856	0.000551361	NAV3	intron_variant
18	BICF2P803978	25620857	G	A	0.237752	3.24687	0.000566414	RNH1-K-RAS	intergenic_region
17	BICF2G630217479	17873635	A	G	0.428674	3.24242	0.000572244	TDRD15-KLHL29	intergenic_region
10	BICF2S23444133	8009531	C	A	0.178211	3.24116	0.000573901	MSRB3	intron_variant
7	BICF2P360529	25348816	A	G	0.331412	3.23718	0.000579182	ZBTB37	downstream_gene_variant
18	TIGRP2P245544_rs8819919	26304449	A	G	0.105908	3.23501	0.000582096	TTC17	intron_variant
3	BICF2G630361693	93927492	A	G	0.146254	3.21954	0.000603197	0	0
38	BICF2G63071552	19446111	A	G	0.0684438	3.21267	0.00061281	7SK-NUF2	intergenic_region
20	BICF2P292564	34198257	G	A	0.156069	3.20872	0.000618413	ERC2	intron_variant
17	BICF2P1464853	50508370	G	A	0.469741	3.19941	0.000631816	EXOC6B	intron_variant
5	BICF2P830540	25199894	A	G	0.101199	3.19139	0.000643595	CWF19L2-GUCY1A2	intergenic_region
33	BICF2P738028	21429812	G	A	0.092219	3.17108	0.000674399	BC040587-ENSCAFG00000001369	intergenic_region
8	BICF2P447284	42017569	A	G	0.159942	3.16902	0.000677611	RAD51B-7SK	intergenic_region
28	BICF2S23519370	31300481	A	T	0.486311	3.16774	0.000679606	FGFR2IIIC	downstream_gene_variant
31	BICF2G630729349	9030416	C	A	0.0821326	3.15382	0.000701748	ROBO1-U6	intergenic_region
18	TIGRP2P245762_rs8893806	25622208	A	T	0.241354	3.14859	0.00071025	RNH1-K-RAS	intergenic_region
4	BICF2P1380852	53764613	A	G	0.327089	3.14186	0.000721346	SGCD-ENSCAFG00000030235	intergenic_region
9	BICF2S23355768	36375420	A	G	0.0842939	3.13891	0.000726255	ZNHIT3	upstream_gene_variant
9	BICF2P791837	36397059	A	G	0.0842939	3.13891	0.000726255	MYO19	intron_variant
1	BICF2G630716201	32500480	A	G	0.17052	3.13847	0.000726995	ENSCAFG00000024055-ENSCAFG00000000289	intergenic_region
20	BICF2S23519852	23676422	A	C	0.153458	3.12343	0.000752617	ENSCAFG00000006583-SUCLG2	intergenic_region
1	TIGRP2P7522_rs8845605	74807859	G	A	0.118156	3.12127	0.000756365	NTRK2-U6	intergenic_region
16	BICF2S23615147	14390809	A	G	0.377745	3.11822	0.000761691	ZNF777	upstream_gene_variant
1	BICF2P161501	87459031	A	G	0.236311	3.1038	0.000787402	MAMDC2-ENSCAFG00000028932	intergenic_region
5	BICF2P764765	15273223	G	A	0.0743146	3.10215	0.000790403	KMT2A	upstream_gene_variant
8	BICF2P251707	45275582	A	G	0.172911	3.08948	0.00081381	SIPA1L1-RGS6	intergenic_region
7	BICF2S23442596	77735816	G	A	0.497118	3.08386	0.000824401	TUBB6	intron_variant
6	TIGRP2P77661_rs8793881	11600849	G	A	0.416427	3.07974	0.000832259	CYTH3-FAM220A	intergenic_region
36	BICF2S232272	18782394	A	G	0.187959	3.06563	0.00085975	CHN1	intron_variant
15	TIGRP2P203665_rs8954494	53338796	A	G	0.344428	3.06334	0.000864298	GUCY1B3-ASIC5	intergenic_region
17	BICF2S23152690	13065268	A	G	0.395533	3.06321	0.000864544	U4-SMC6	intergenic_region
17	BICF2G630203658	50524517	A	G	0.299712	3.05958	0.000871804	EXOC6B	intron_variant
16	BICF2G630845200	14573661	G	A	0.428674	3.05717	0.000876653	SSPO	intron_variant
20	BICF2S23250263	26363605	A	G	0.0612392	3.04388	0.000903905	U4atac-ADAMTS9	intergenic_region
34	BICF2S22913095	5603732	G	A	0.17147	3.03628	0.000919853	SEMA5A-ENSCAFG00000031045	intergenic_region
17	BICF2G630218345	16321591	G	A	0.448847	3.03202	0.000928932	TDRD15-KLHL29	intergenic_region
36	TIGRP2P415709_rs8544318	32512121	G	A	0.309798	3.02639	0.00094104	0	0
12	BICF2S23738775	67324322	G	A	0.0979827	3.02432	0.000945534	CDK19	intron_variant
34	TIGRP2P402584_rs8838897	5620597	A	G	0.171717	3.02053	0.000953837	ENSCAFG00000031045-MTRR	intergenic_region
14	BICF2P531895	42204595	A	G	0.217579	3.01921	0.00095674	CPVL-CHN2	intergenic_region
33	BICF2S23632646	27918330	A	G	0.496398	3.01879	0.000957667	ITGB5-MUC13	intergenic_region
4	BICF2S23016185	53746544	T	A	0.455331	3.01705	0.000961504	SGCD-ENSCAFG00000030235	intergenic_region
39	BICF2G630540117	2906358	G	A	0.229107	3.01242	0.000971811	0	0
3	BICF2P432596	71453898	T	A	0.190751	3.0121	0.000972528	UCHL1-ENSCAFG00000007718	intergenic_region
6	BICF2P316667	69755370	A	G	0.295389	3.01004	0.000977158	ST6GALNAC5	intron_variant
6	BICF2P64033	8670477	A	C	0.107349	3.00009	0.000999794	MOGAT3	upstream_gene_variant
4	BICF2P492710	30591794	A	G	0.491354	2.99973	0.00100063	SH2D4B-5S_rRNA	intergenic_region
20	TIGRP2P272419_rs8893890	23558530	G	A	0.377522	2.99678	0.00100745	ENSCAFG00000006583-SUCLG2	intergenic_region
26	BICF2G630197048	38229090	A	G	0.054755	2.99511	0.00101133	RNLS	intron_variant
9	BICF2P53257	33963114	G	A	0.337386	2.98617	0.00103235	YPEL2-DHX40	intergenic_region
25	BICF2G630101746	36490277	A	G	0.134726	2.98289	0.00104018	SNORD112-ENSCAFG00000022876	intergenic_region
15	BICF2P956368	53272289	A	C	0.344928	2.97886	0.00104987	GUCY1B3	intron_variant
5	BICF2S235971	32959073	A	G	0.174352	2.97678	0.00105492	PER1	intron_variant
32	BICF2G630594783	20632694	A	G	0.292507	2.97452	0.00106043	RAP1GDS1	intron_variant
11	BICF2G630304315	63222249	A	G	0.447406	2.97069	0.00106981	ENSCAFG00000026792-ACTL7B	intergenic_region
11	TIGRP2P150779_rs8716667	64481776	A	G	0.100144	2.96985	0.0010719	FRRS1L-PTPN3	intergenic_region
1	BICF2S23660765	87746081	A	C	0.178674	2.96693	0.00107913	PTAR1	intron_variant
4	TIGRP2P61631_rs9008725	50759830	G	A	0.0850144	2.96383	0.00108685	ADRA1B-IL12B	intergenic_region
6	BICF2G630573538	57537524	A	G	0.355187	2.96269	0.0010897	HFM1	downstream_gene_variant
15	BICF2S22948103	53303543	A	C	0.345101	2.95875	0.00109965	GUCY1B3	intron_variant
15	BICF2P1057062	53373071	C	A	0.345101	2.95875	0.00109965	ASIC5	synonymous_variant
24	BICF2S2412814	32580582	C	G	0.181097	2.95537	0.00110824	CKPI-MATN4	intergenic_region
37	BICF2P218778	19425737	G	A	0.39508	2.94899	0.00112462	ERBB4	intron_variant
1	BICF2S23049006	30791545	G	A	0.231988	2.94419	0.00113713	NHSL1	intron_variant
6	BICF2P318271	25243730	C	G	0.134006	2.94122	0.00114494	ENSCAFG00000027918-GPR139	intergenic_region
15	BICF2P130695	53238031	G	A	0.344877	2.93692	0.00115632	GUCY1A3	downstream_gene_variant
32	BICF2P884434	3464308	A	G	0.47114	2.93668	0.00115697	PAQR3-NAA11	intergenic_region
38	BICF2P102171	17692589	A	C	0.0799712	2.9335	0.00116547	MGST3-LRRC52	intergenic_region
11	BICF2P522887	46227068	A	G	0.262248	2.92946	0.00117637	5S_rRNA-cfa-mir-876	intergenic_region
8	TIGRP2P108126_rs8844954	18516221	G	A	0.412104	2.92706	0.00118287	FBXO33-ENSCAFG00000008462	intergenic_region
15	BICF2P369098	25558072	G	A	0.450938	2.92507	0.00118831	U6-SLC6A15	intergenic_region
34	TIGRP2P399367_rs8980962	36497251	A	G	0.488473	2.91993	0.00120245	FNDC3B	intron_variant
28	BICF2S234569	28744262	A	G	0.44733	2.91643	0.00121218	FAM204A-PRLHR	intergenic_region
2	BICF2P1470409	56990679	A	G	0.12464	2.91508	0.00121595	ARHGEF28-ENC1	intergenic_region
7	BICF2P391679	28129316	A	G	0.170749	2.91083	0.00122793	PRRX1	intron_variant
6	TIGRP2P89556_rs9065752	77060773	A	G	0.0518732	2.90891	0.00123337	WLS	intron_variant
6	BICF2S23634218	67692981	A	G	0.322767	2.90739	0.00123769	U4-ELTD1	intergenic_region
1	BICF2P770158	87575314	A	G	0.120317	2.90722	0.00123816	ENSCAFG00000028932-C9orf135	intergenic_region
32	BICF2P964517	18031595	A	G	0.0886167	2.90213	0.00125277	UNC5C	intron_variant
7	BICF2G630553087	18633179	G	A	0.48415	2.89403	0.00127634	IVNS1ABP-HMCN1	intergenic_region
11	BICF2P1363557	46841479	A	G	0.100289	2.89173	0.00128314	ENSCAFG00000026571	upstream_gene_variant
18	BICF2P922119	18812648	G	A	0.142651	2.88991	0.00128852	MAGI2-GNAI1	intergenic_region
25	TIGRP2P330916_rs8608387	42533079	G	A	0.339337	2.88943	0.00128993	SP140	downstream_gene_variant
21	BICF2S23224465	14824865	A	G	0.458934	2.88521	0.00130254	U6-DLG2	intergenic_region
37	BICF2P276993	24028962	A	C	0.180836	2.88508	0.00130292	TNP1-Pinc	intergenic_region
34	BICF2P1441442	6039995	G	A	0.216763	2.8801	0.00131794	ENSCAFG00000031045-MTRR	intergenic_region
21	BICF2P46098	9136439	A	G	0.276734	2.87698	0.00132745	ENSCAFG00000004270-ENSCAFG00000025134	intergenic_region
6	BICF2P764928	10499548	A	G	0.100865	2.87452	0.00133501	SMURF1	downstream_gene_variant
24	BICF2P1369526	8214838	G	A	0.253968	2.87219	0.00134217	ENSCAFG00000030939-FLRT3	intergenic_region
31	TIGRP2P376221_rs9053384	26453725	A	C	0.47114	2.86234	0.00137296	TIAM1-U6	intergenic_region
36	BICF2P936625	22105511	A	G	0.307637	2.85932	0.00138254	FKBP7	upstream_gene_variant
16	BICF2G630846964	17661718	G	A	0.082853	2.8589	0.00138387	DPP6	intron_variant
6	BICF2P1461175	15455294	A	G	0.0569986	2.8535	0.00140121	INTS1	missense_variant
35	BICF2P42970	28318287	A	G	0.397695	2.84397	0.00143228	0	0
3	BICF2S23723485	88430732	A	G	0.169308	2.84098	0.00144217	GPR125-KCNIP4	intergenic_region
15	BICF2P650393	21801656	A	G	0.306916	2.83962	0.00144669	ENSCAFG00000005762-SYT1	intergenic_region
35	TIGRP2P409614_rs8865546	26025555	A	G	0.126801	2.83799	0.00145215	ENSCAFG00000024971-ENSCAFG00000012123	intergenic_region
30	BICF2P1126419	17022159	A	G	0.449568	2.83603	0.00145873	CYP19A1-GLDN	intergenic_region
2	TIGRP2P32655_rs9087042	83260976	A	G	0.110231	2.83335	0.00146774	ENSCAFG00000016352-ENSCAFG00000016356	intergenic_region
8	TIGRP2P114044_rs9021170	45294465	A	G	0.149135	2.83286	0.0014694	SIPA1L1-RGS6	intergenic_region
8	BICF2P437929	21835629	A	G	0.119769	2.83066	0.00147686	U6-FSCB	intergenic_region
11	TIGRP2P151217_rs8854872	66255756	A	G	0.212428	2.82418	0.00149906	DNAJC25	intron_variant
2	BICF2G630676606	11420854	G	A	0.228386	2.82342	0.0015017	MLLT10	intron_variant
6	BICF2S23449922	24875516	G	A	0.217579	2.81666	0.00152524	ENSCAFG00000024109	intron_variant
1	BICF2G630718970	36778795	C	G	0.229532	2.81353	0.00153628	ENSCAFG00000000327-EPM2A	intergenic_region
14	BICF2G630528708	41797269	A	G	0.401297	2.81254	0.00153977	CREB5	intron_variant
3	BICF2P759838	88291044	T	A	0.242795	2.81219	0.00154103	GPR125-KCNIP4	intergenic_region
20	BICF2P1451331	40886541	G	A	0.367435	2.81059	0.00154672	ENSCAFG00000029616-MAP4	intergenic_region
2	BICF2P267812	66005696	A	C	0.268012	2.80915	0.00155185	CBLN1-N4BP1	intergenic_region
1	TIGRP2P2428_rs8625534	47630748	A	C	0.145864	2.80885	0.00155293	SERAC1	intron_variant
26	BICF2P914293	24218052	A	G	0.283862	2.80799	0.00155601	LIMK2	intron_variant
5	BICF2S23014586	25892221	A	G	0.17316	2.80797	0.00155606	MRPS36-ENSCAFG00000001472	intergenic_region
21	TIGRP2P279181_rs8600841	10989372	A	T	0.426513	2.80557	0.00156468	GRM5	intron_variant
5	BICF2P552783	76906234	G	A	0.349928	2.8053	0.00156568	ENSCAFG00000020167	synonymous_variant
9	TIGRP2P127016_rs9016932	43494535	G	A	0.148415	2.80117	0.00158062	NUFIP2-TAOK1	intergenic_region
7	TIGRP2P98448_rs9253405	52186912	G	A	0.119597	2.79916	0.00158797	U6-KIAA1328	intergenic_region
21	BICF2P43564	9130125	A	G	0.275937	2.79803	0.00159211	ENSCAFG00000004270-ENSCAFG00000025134	intergenic_region
11	BICF2P1376345	47127398	C	A	0.101585	2.78937	0.00162415	ENSCAFG00000026571-ENSCAFG00000001731	intergenic_region
18	BICF2P415260	8046328	A	G	0.412104	2.78524	0.00163968	GLI3	intron_variant
3	BICF2P733834	88055521	C	A	0.152958	2.78487	0.00164108	GPR125-KCNIP4	intergenic_region
4	BICF2P69592	25850929	G	A	0.378066	2.78308	0.00164787	ZNF503-C10orf11	intergenic_region
36	BICF2G630766314	5031771	A	G	0.211816	2.78303	0.00164803	ENSCAFG00000009377	downstream_gene_variant
11	BICF2P427368	71590374	A	G	0.204185	2.7822	0.00165122	TLR4-U6	intergenic_region
20	BICF2P882643	34465722	A	C	0.149135	2.78064	0.00165716	ERC2	intron_variant
6	TIGRP2P81457_rs8691370	35999162	G	A	0.356628	2.77846	0.00166548	ENSCAFG00000019087-ENSCAFG00000019089	intergenic_region
6	BICF2P1381179	11605114	G	C	0.351852	2.77577	0.00167584	CYTH3-FAM220A	intergenic_region
20	TIGRP2P273525_rs8705404	27715862	G	A	0.252882	2.77431	0.00168149	SYNPR	intron_variant
7	BICF2G630565078	65760114	A	G	0.322046	2.77358	0.00168431	ENSCAFG00000018233-ENSCAFG00000018235	intergenic_region
8	BICF2P1158678	17063335	A	G	0.328676	2.7686	0.00170372	ENSCAFG00000028068-SNORA5	intergenic_region
21	BICF2P406311	10569609	A	C	0.310519	2.76785	0.00170668	ENSCAFG00000006666	upstream_gene_variant
4	BICF2P1431787	71630098	C	G	0.490607	2.7654	0.00171631	NIPBL	intron_variant
33	TIGRP2P390665_rs9000628	33999762	A	G	0.247839	2.76478	0.00171876	0	0
21	TIGRP2P289917_rs8584874	8522887	A	C	0.185426	2.75943	0.00174008	FAT3-ENSCAFG00000004270	intergenic_region
18	BICF2P425749	24913361	A	G	0.304035	2.7577	0.00174701	ENSCAFG00000031180-SEPT14	intergenic_region
11	BICF2P1069611	64364460	G	A	0.117435	2.75651	0.00175182	FRRS1L	intron_variant
34	BICF2P56495	11847785	A	C	0.395382	2.75424	0.00176101	AHRR	intron_variant
8	BICF2P307999	19717977	G	A	0.065562	2.75326	0.00176499	LRFN5-U6	intergenic_region
3	BICF2G630352603	80801257	G	A	0.223913	2.75149	0.00177218	ENSCAFG00000016344-U1	intergenic_region
24	BICF2P1292599	22785586	T	A	0.0597983	2.75016	0.00177761	CBFA2T2	intron_variant
24	BICF2S23241658	22787217	A	G	0.0597983	2.75016	0.00177761	CBFA2T2	intron_variant
24	BICF2S23241659	22787263	G	A	0.0597983	2.75016	0.00177761	CBFA2T2	intron_variant
24	BICF2S24117809	22797494	G	A	0.0597983	2.75016	0.00177761	CBFA2T2	intron_variant
15	BICF2G630439970	21124417	A	G	0.145022	2.74877	0.00178334	NAV3-ENSCAFG00000005762	intergenic_region
33	BICF2P1135209	5486209	C	A	0.0597983	2.74288	0.00180769	CPOX-ENSCAFG00000028564	intergenic_region
24	BICF2S2296211	16147186	A	G	0.32853	2.74044	0.00181786	C20orf196-GPCPD1	intergenic_region
19	BICF2P996871	4796775	A	G	0.220058	2.73895	0.0018241	SLC7A11-ENSCAFG00000003755	intergenic_region
1	BICF2S23523128	87599280	A	G	0.136888	2.73761	0.00182976	C9orf135	intron_variant
3	BICF2G630355260	88470055	C	A	0.299133	2.73661	0.00183397	GPR125-KCNIP4	intergenic_region
24	TIGRP2P311971_rs8578093	19065717	A	G	0.451729	2.73613	0.00183599	PDYN-ENSCAFG00000025524	intergenic_region
13	BICF2S2314086	42609816	A	G	0.496398	2.73429	0.00184379	GABRA2-GABRA4	intergenic_region
34	TIGRP2P402637_rs8709506	5835424	A	G	0.395533	2.73258	0.00185104	ENSCAFG00000031045-MTRR	intergenic_region
8	BICF2P133211	27254634	A	G	0.262968	2.73203	0.00185341	PYGL	intron_variant
15	BICF2P889046	58234140	G	A	0.0576369	2.73017	0.00186134	FSTL5	intron_variant
4	BICF2P614182	74235196	G	A	0.167147	2.72854	0.00186834	TARS	intron_variant
20	BICF2P894202	23897194	A	G	0.0662824	2.72361	0.00188968	ENSCAFG00000006583-SUCLG2	intergenic_region
4	BICF2P1385425	25464414	G	A	0.0597983	2.71657	0.00192056	VDAC2	downstream_gene_variant
12	TIGRP2P161320_rs8749083	28944618	C	G	0.0648415	2.71458	0.00192941	ENSCAFG00000023580-SNORA62	intergenic_region
21	BICF2S23217413	41037080	A	G	0.064121	2.71331	0.00193502	SPTY2D1	intron_variant
28	BICF2G630267520	27367623	G	A	0.185159	2.70902	0.00195425	HSPA12A-ENO4	intergenic_region
28	BICF2G630267504	27374422	A	G	0.185159	2.70902	0.00195425	HSPA12A-ENO4	intergenic_region
12	BICF2P1393408	67169508	A	G	0.177954	2.70697	0.00196349	SLC22A16-CDK19	intergenic_region
15	BICF2P262224	53248398	A	G	0.336455	2.70528	0.00197115	GUCY1A3-GUCY1B3	intergenic_region
15	BICF2S23238125	53287510	A	G	0.336455	2.70528	0.00197115	GUCY1B3	intron_variant
15	TIGRP2P203637_rs8672515	53302373	G	A	0.336455	2.70528	0.00197115	GUCY1B3	intron_variant
15	BICF2S23527645	53326757	A	G	0.336455	2.70528	0.00197115	GUCY1B3-ASIC5	intergenic_region
20	BICF2P528863	27958801	A	C	0.287464	2.70432	0.00197551	SYNPR-CADPS	intergenic_region
15	BICF2P1014000	53411245	G	A	0.350649	2.70379	0.00197792	TDO2	missense_variant
10	BICF2S23129706	7966915	G	A	0.474026	2.70378	0.00197799	MSRB3	intron_variant
7	TIGRP2P93872_rs9240447	28109255	G	A	0.161383	2.70239	0.0019843	PRRX1	intron_variant
11	BICF2P292180	46860855	G	A	0.49928	2.70076	0.00199179	ENSCAFG00000026571-ENSCAFG00000001731	intergenic_region
7	TIGRP2P95182_rs9171688	38637905	G	A	0.413545	2.69947	0.00199769	LIN9	intron_variant
23	TIGRP2P306119_rs8492617	42427976	A	G	0.18804	2.69631	0.0020123	7SK-ZIC4	intergenic_region
16	BICF2S2334185	10809297	A	G	0.264409	2.69395	0.00202324	CREB3L2-DGKI	intergenic_region
16	BICF2S2334964	10812242	G	A	0.264409	2.69395	0.00202324	CREB3L2-DGKI	intergenic_region
11	BICF2P93273	36328834	A	C	0.229827	2.69079	0.00203805	ENSCAFG00000032301-BNC2	intergenic_region
23	BICF2P843643	24736732	A	G	0.0936599	2.68992	0.00204213	SATB1-ENSCAFG00000027514	intergenic_region
24	BICF2G630510330	13648877	C	A	0.215418	2.68956	0.0020438	PLCB1-TMX4	intergenic_region
17	BICF2G630205084	48668243	A	C	0.322977	2.68785	0.00205186	WBP1	downstream_gene_variant
35	TIGRP2P408632_rs8749061	22715679	G	A	0.458934	2.68556	0.00206273	ACOT13	intron_variant
17	BICF2P452200	48128665	G	A	0.0707071	2.68416	0.0020694	TACR1	intron_variant
1	BICF2G630791014	87058588	A	G	0.12464	2.68229	0.0020783	TRPM3-KLF9	intergenic_region
9	BICF2S24317651	58402907	A	G	0.135447	2.68182	0.00208054	NR6A1	intron_variant
11	BICF2P221070	47153895	G	A	0.263006	2.6816	0.00208161	ENSCAFG00000026571-ENSCAFG00000001731	intergenic_region
15	BICF2P1314960	53260054	A	G	0.336941	2.68125	0.00208331	GUCY1A3-GUCY1B3	intergenic_region
23	BICF2G630364259	52454062	T	A	0.128242	2.68108	0.00208412	0	0
34	TIGRP2P402820_rs8985928	6261145	A	G	0.195245	2.68078	0.00208554	ADCY2	intron_variant
6	BICF2P699862	14845203	G	A	0.327089	2.67715	0.00210303	SNX8	intron_variant
3	BICF2G630340121	44592607	A	C	0.444524	2.67565	0.00211032	NR2F2-ENSCAFG00000026734	intergenic_region
7	BICF2S23547289	77740012	A	G	0.254323	2.67224	0.00212695	TUBB6	intron_variant
25	BICF2G630465361	19622266	A	G	0.141931	2.67059	0.00213505	CBR4	upstream_gene_variant
5	BICF2S23058014	32531966	G	A	0.41474	2.66753	0.00215014	SAT2	downstream_gene_variant
28	BICF2G630271608	21855809	A	G	0.366715	2.66625	0.0021565	SNORA65	downstream_gene_variant
28	BICF2P513614	34938085	A	G	0.271614	2.66559	0.00215976	EDRF1	downstream_gene_variant
6	TIGRP2P81978_rs8491947	38402424	A	C	0.0533141	2.66396	0.00216789	PRSS27	downstream_gene_variant
5	BICF2P1132921	15920920	A	C	0.126263	2.66329	0.00217126	ENSCAFG00000029861-ENSCAFG00000027627	intergenic_region
36	BICF2G630766852	3962121	A	G	0.5	2.66203	0.00217756	U6-U6	intergenic_region
9	BICF2G630835753	37047450	G	A	0.377583	2.65903	0.00219266	ACACA	intron_variant
35	BICF2P698960	11758460	A	G	0.173631	2.65327	0.00222191	HIVEP1-EDN1	intergenic_region
29	BICF2S2417496	20062065	A	T	0.175793	2.65261	0.0022253	XKR9-EYA1	intergenic_region
15	BICF2G630443369	14067340	A	G	0.0706052	2.65193	0.00222879	NSUN4	intron_variant
21	BICF2P493874	48388824	A	G	0.404179	2.65042	0.00223657	BDNF-U6	intergenic_region
23	BICF2G630362669	53903867	A	C	0.0541126	2.64772	0.00225052	0	0
38	TIGRP2P424167_rs8800283	16171469	C	A	0.466859	2.64765	0.00225086	U6-DUSP10	intergenic_region
11	BICF2S22940978	45308680	G	C	0.117435	2.64764	0.00225094	TEK	intron_variant
23	BICF2G630369003	48082370	C	A	0.252882	2.64761	0.00225107	U6-ARHGEF26	intergenic_region
7	BICF2P435072	15706159	G	A	0.26912	2.64751	0.00225157	ZNF648-GLUL	intergenic_region
11	BICF2P703163	47020382	G	A	0.0691643	2.64498	0.00226476	ENSCAFG00000026571-ENSCAFG00000001731	intergenic_region
1	BICF2G630714480	21128662	A	G	0.147695	2.64492	0.00226506	ENSCAFG00000030508	upstream_gene_variant
13	BICF2G630608621	15791207	A	G	0.452381	2.64487	0.00226532	ENSCAFG00000027644-EIF3H	intergenic_region
18	TIGRP2P245548_rs8976311	26297357	A	G	0.162003	2.64185	0.00228114	TTC17	upstream_gene_variant
29	BICF2G630631308	34999040	A	G	0.24928	2.6413	0.00228404	ENSCAFG00000008943-ENSCAFG00000008955	intergenic_region
8	BICF2P732946	19654869	A	G	0.0662824	2.64102	0.00228551	LRFN5-U6	intergenic_region
16	BICF2S23730630	10831859	A	G	0.286023	2.63757	0.00230373	DGKI	intron_variant
23	BICF2G630373007	37032395	C	A	0.158009	2.63731	0.00230511	SPSB4	intron_variant
34	BICF2P279607	6017293	G	A	0.463977	2.63377	0.00232399	ENSCAFG00000031045-MTRR	intergenic_region
5	BICF2S23642432	14853533	G	A	0.243516	2.63301	0.00232806	FOXR1	intron_variant
18	BICF2P332267	27741983	G	C	0.116715	2.63114	0.00233809	U1-LRRC4C	intergenic_region
3	BICF2P692472	86437117	A	G	0.324928	2.63045	0.00234178	PPARGC1A-GBA3	intergenic_region
9	BICF2G630836496	38556854	G	A	0.393218	2.62899	0.00234966	ENSCAFG00000030750-ENSCAFG00000018340	intergenic_region
1	BICF2S23742416	60435549	A	C	0.0691643	2.62878	0.00235083	U4-ENSCAFG00000030746	intergenic_region
3	BICF2G630340083	44551778	A	T	0.487013	2.62872	0.00235117	NR2F2-ENSCAFG00000026734	intergenic_region
4	BICF2P1256627	36478620	G	A	0.229827	2.62834	0.0023532	HK3	intron_variant
11	BICF2P1218201	55452657	G	A	0.301873	2.62826	0.00235365	TBC1D2	intron_variant
19	BICF2P1151337	13998398	G	A	0.335014	2.62805	0.00235476	U6-ENSCAFG00000003946	intergenic_region
38	BICF2S23655544	17889697	G	A	0.313131	2.62802	0.00235493	RXRG	intron_variant
21	BICF2P187978	11003717	G	A	0.43804	2.62688	0.00236112	GRM5	intron_variant
3	BICF2P648682	69127226	A	G	0.314121	2.62646	0.00236342	ZNF518B	downstream_gene_variant
31	BICF2P403553	28808342	A	G	0.342713	2.625	0.0023714	ENSCAFG00000031162	missense_variant
8	BICF2P878533	8114716	A	G	0.456052	2.62372	0.00237835	ENSCAFG00000012522-ENSCAFG00000012527	intergenic_region
5	BICF2S23056870	32535803	A	G	0.414265	2.61758	0.00241226	SAT2	missense_variant
18	TIGRP2P240301_rs8864461	18796770	A	G	0.153458	2.61748	0.00241278	MAGI2-GNAI1	intergenic_region
12	BICF2S23338638	28194934	C	A	0.472543	2.61532	0.00242481	U6	upstream_gene_variant
29	BICF2P1117471	20093636	A	G	0.342029	2.61091	0.00244955	XKR9-EYA1	intergenic_region
1	BICF2S23450850	52273892	A	C	0.224784	2.60918	0.00245933	QKI-HNRNPDL	intergenic_region
8	BICF2P225614	9395879	A	G	0.495677	2.60665	0.00247369	PRKD1-ENSCAFG00000012573	intergenic_region
34	BICF2G630452943	35593097	A	G	0.152017	2.60413	0.00248809	TNIK	intron_variant
11	BICF2S23725001	42029569	G	A	0.20245	2.60242	0.0024979	DMRTA1-ELAVL2	intergenic_region
33	BICF2S23259853	17025081	A	G	0.121481	2.60097	0.00250628	BTLA-ENSCAFG00000010493	intergenic_region
11	BICF2P215738	47994938	G	A	0.353026	2.60056	0.00250863	U6-U4	intergenic_region
14	BICF2G630521338	13976343	A	G	0.0706052	2.59635	0.00253311	SLC25A40	intron_variant
14	BICF2G630521364	14004493	A	G	0.0706052	2.59635	0.00253311	DBF4	intron_variant
36	BICF2P716913	27624549	T	A	0.262248	2.5921	0.00255802	ZNF804A-U6	intergenic_region
17	BICF2G630218209	16435966	G	A	0.23487	2.5899	0.00257099	TDRD15-KLHL29	intergenic_region
11	BICF2P356029	65917384	G	A	0.21026	2.58976	0.00257179	LPAR1-OR2K2	intergenic_region
8	TIGRP2P117016_rs9099713	9788878	G	A	0.458213	2.58932	0.00257443	PRKD1-ENSCAFG00000012573	intergenic_region
7	BICF2P556304	32733376	C	A	0.410663	2.58927	0.00257471	RGS7-FH	intergenic_region
8	BICF2P216464	54938047	A	T	0.435065	2.58777	0.00258365	5S_rRNA-U6	intergenic_region
1	BICF2P222704	87167823	T	A	0.100865	2.58267	0.00261417	KLF9-SMC5	intergenic_region
5	BICF2S23334044	85188767	G	A	0.0461095	2.57975	0.00263179	CDH11-CDH8	intergenic_region
24	BICF2G630509944	14148172	G	A	0.270563	2.57901	0.00263629	TMX4	intron_variant
30	BICF2P1129102	17736057	C	A	0.431556	2.57586	0.00265547	MAPK6	synonymous_variant
31	BICF2P272953	4116126	A	G	0.230159	2.57555	0.00265734	ENSCAFG00000032194-ENSCAFG00000029014	intergenic_region
11	BICF2P168227	47126350	G	A	0.162824	2.57484	0.00266169	ENSCAFG00000026571-ENSCAFG00000001731	intergenic_region
20	BICF2P992882	34582805	G	A	0.417147	2.57431	0.00266496	ERC2	intron_variant
26	BICF2P40990	41244246	G	A	0.173631	2.57105	0.00268503	0	0
17	BICF2G630218734	15978569	A	C	0.305476	2.5632	0.00273399	TDRD15	upstream_gene_variant
1	BICF2S2369384	65275897	A	G	0.487032	2.56213	0.00274076	U6-ENSCAFG00000001064	intergenic_region
5	BICF2P958242	63057251	A	C	0.146377	2.56198	0.00274169	CTNNBIP1	intron_variant
1	TIGRP2P1012_rs8515774	30745856	A	G	0.24928	2.55973	0.00275597	NHSL1	stop_gained
5	BICF2P945533	54606497	A	G	0.362392	2.55838	0.00276449	ACOT11-SSBP3	intergenic_region
28	BICF2G630272409	20039037	A	G	0.463256	2.55584	0.00278074	U4-XPNPEP1	intergenic_region
2	BICF2P339253	83195413	A	G	0.0910405	2.55176	0.00280696	ENSCAFG00000016352-ENSCAFG00000016356	intergenic_region
10	BICF2P635077	8082416	A	G	0.144813	2.55123	0.00281039	MSRB3-ENSCAFG00000022943	intergenic_region
35	BICF2S23751626	15390982	A	G	0.351585	2.54719	0.00283668	MYLIP-GMPR	intergenic_region
5	BICF2G630239639	72956060	C	A	0.0662824	2.5458	0.00284577	WWOX	intron_variant
12	BICF2P1368233	23547966	G	A	0.138528	2.54503	0.00285079	COL21A1-U6	intergenic_region
1	BICF2P626276	35081504	G	A	0.248559	2.54361	0.00286014	FUCA2-ENSCAFG00000032743	intergenic_region
20	BICF2P1353278	26680721	C	A	0.314121	2.54352	0.00286076	ADAMTS9	intron_variant
30	BICF2S23613770	11144771	A	G	0.29755	2.54342	0.00286144	CTDSPL2	intron_variant
26	BICF2P1508585	36301531	A	C	0.418588	2.54253	0.00286725	CSTF2T-ENSCAFG00000023425	intergenic_region
20	BICF2G630445226	60376823	A	G	0.2	2.54108	0.00287685	0	0
25	BICF2G630156959	52945368	A	G	0.386067	2.54072	0.00287927	0	0
4	TIGRP2P68168_rs8614672	89349404	A	G	0.0611354	2.53983	0.00288515	0	0
34	BICF2G630449802	40781700	A	G	0.481988	2.53658	0.00290682	TBL1XR1-ENSCAFG00000026532	intergenic_region
15	BICF2G630443632	12655786	A	C	0.124803	2.53619	0.00290945	SLC5A9	intron_variant
34	TIGRP2P401871_rs8674418	44619969	C	A	0.259366	2.53411	0.00292343	0	0
12	BICF2P413065	24317672	A	G	0.260837	2.53219	0.00293639	ZNF451	intron_variant
3	BICF2S23355278	69995706	G	A	0.484513	2.53165	0.00294005	STX18-MSX1	intergenic_region
9	BICF2G630474858	59996893	A	G	0.0792507	2.53048	0.00294797	OR5C1-ENSCAFG00000020257	intergenic_region
35	BICF2P490333	22730684	A	C	0.455331	2.52902	0.00295788	C6orf62	intron_variant
7	BICF2P509591	21897620	G	A	0.365994	2.52829	0.00296287	SEC16B-BRINP2	intergenic_region
28	BICF2G630269027	24869962	G	A	0.415192	2.52713	0.00297079	NHLRC2-ADRB1	intergenic_region
23	TIGRP2P300779_rs8701610	18102142	G	A	0.373016	2.5222	0.0030047	NGLY1	3_prime_UTR_variant
14	BICF2G630529818	43233751	A	G	0.413545	2.5213	0.00301094	NOD1-GGCT	intergenic_region
32	TIGRP2P378721_rs8776366	12719791	A	G	0.337025	2.52007	0.00301949	ENSCAFG00000009864-ENSCAFG00000029213	intergenic_region
13	BICF2P1072241	50235136	T	A	0.336941	2.51943	0.00302393	ENSCAFG00000002336-ENSCAFG00000002337	intergenic_region
29	BICF2P1141660	17564065	G	A	0.35879	2.51852	0.00303029	PREX2	intron_variant
15	BICF2P1438625	53425192	G	A	0.341499	2.51815	0.00303286	TDO2	downstream_gene_variant
6	BICF2P34631	13997258	G	A	0.106061	2.51636	0.00304536	SDK1-CARD11	intergenic_region
11	BICF2P822019	46880198	G	A	0.15873	2.51466	0.00305732	ENSCAFG00000026571-ENSCAFG00000001731	intergenic_region
6	BICF2S23660302	37448483	G	A	0.29611	2.51396	0.00306223	CREBBP	intron_variant
32	BICF2S23624518	30229529	G	A	0.191643	2.51052	0.00308661	ELOVL6	intron_variant
28	BICF2G630268912	25034623	A	G	0.0806916	2.50972	0.00309228	TDRD1	intron_variant
20	BICF2S233364	51589888	A	C	0.0607815	2.50929	0.00309534	ENSCAFG00000030274-ENSCAFG00000023619	intergenic_region
36	BICF2S23738844	33490187	G	A	0.18804	2.50928	0.00309545	0	0
17	BICF2P308386	48478656	A	G	0.462536	2.50799	0.00310465	SEMA4F	3_prime_UTR_variant
38	BICF2G63067240	25461376	A	G	0.163545	2.50595	0.00311924	0	0
12	BICF2P337717	23535318	C	A	0.139049	2.50463	0.00312877	COL21A1-U6	intergenic_region
29	BICF2G630632471	36277625	G	A	0.104467	2.50454	0.00312936	NECAB1	intron_variant
35	BICF2P1280527	11610103	A	G	0.14049	2.50365	0.00313584	HIVEP1	intron_variant
29	BICF2P1133982	21831497	C	A	0.273775	2.50326	0.00313864	ENSCAFG00000008012-U6	intergenic_region
35	BICF2S2306637	13147875	A	C	0.137608	2.50301	0.00314046	RANBP9	intron_variant
8	BICF2P1096387	18498334	A	G	0.350865	2.50201	0.00314769	FBXO33-ENSCAFG00000008462	intergenic_region
11	BICF2S22963829	36305350	G	A	0.34438	2.50111	0.00315423	ENSCAFG00000032301-BNC2	intergenic_region
6	TIGRP2P77677_rs8519218	11608766	A	G	0.342713	2.49869	0.00317183	CYTH3-FAM220A	intergenic_region
1	BICF2P1364159	90583868	A	G	0.0713256	2.49712	0.00318331	ENSCAFG00000001991-SMARCA2	intergenic_region
1	BICF2P1385937	89459991	G	A	0.145743	2.49426	0.00320432	DOCK8-KANK1	intergenic_region
1	BICF2P1298214	52138249	G	A	0.324207	2.49349	0.00321007	QKI-HNRNPDL	intergenic_region
20	BICF2S23542015	25522461	A	G	0.0972622	2.4934	0.00321072	ENSCAFG00000030398-ENSCAFG00000006722	intergenic_region
20	BICF2S2399921	51542485	C	A	0.0626801	2.49033	0.00323349	ZNF317-U6	intergenic_region
12	BICF2P643547	34387812	G	A	0.315562	2.49023	0.0032342	RIMS1	splice_region_variant&intron_variant
28	BICF2P114685	35369286	C	A	0.464697	2.48889	0.00324425	ADAM12	intron_variant
11	BICF2P350522	58274682	G	A	0.227666	2.4887	0.00324564	RNF20	downstream_gene_variant
25	BICF2G630466089	18642466	T	A	0.264834	2.48813	0.0032499	RNF17	intron_variant
4	BICF2S232671	18120230	C	A	0.331412	2.48601	0.00326579	CTNNA3	intron_variant
31	BICF2P977455	34122407	A	G	0.383285	2.486	0.00326586	BRWD1	3_prime_UTR_variant
3	BICF2G630361787	94159014	G	A	0.142651	2.48356	0.00328431	0	0
29	BICF2G630632824	36768810	G	A	0.0857349	2.48291	0.00328919	SLC26A7-RUNX1T1	intergenic_region
25	BICF2P882309	44037153	A	G	0.305476	2.48267	0.00329101	DIS3L2	intron_variant
7	BICF2P1348825	20921590	A	G	0.0605187	2.48237	0.0032933	RALGPS2	intron_variant
15	BICF2P883681	38697098	G	A	0.367435	2.48057	0.00330697	ANKS1B	intron_variant
6	TIGRP2P85743_rs8643382	9066007	A	G	0.140693	2.47957	0.0033146	TFR2	intron_variant
15	BICF2P151230	20861265	A	G	0.299855	2.4771	0.00333352	NAV3	intron_variant
6	BICF2P1430225	11608900	G	A	0.342939	2.47632	0.00333948	CYTH3-FAM220A	intergenic_region
6	BICF2S2296995	11616418	A	G	0.342939	2.47632	0.00333948	CYTH3-FAM220A	intergenic_region
28	BICF2G630265335	35630771	A	C	0.157061	2.475	0.00334962	C10orf90	intron_variant
16	BICF2P940040	33310906	G	A	0.12987	2.47424	0.00335553	PURG	intron_variant
5	BICF2P1187669	79090831	A	C	0.279942	2.47415	0.00335624	ZFHX3-PSMD7	intergenic_region
20	BICF2P1394766	44400207	A	G	0.337176	2.47371	0.00335962	KLHL26	downstream_gene_variant
5	TIGRP2P75970_rs8603400	87777661	A	G	0.401297	2.47333	0.00336259	CDH8-ENSCAFG00000028545	intergenic_region
20	BICF2P1423766	34594689	A	G	0.461816	2.47315	0.00336396	ERC2-WNT5A	intergenic_region
4	BICF2G630172002	80714000	G	A	0.355908	2.47253	0.00336879	7SK-CDH10	intergenic_region
20	BICF2G630228060	6304592	A	G	0.352092	2.47097	0.00338089	NUCB1-ENSCAFG00000004994	intergenic_region
7	BICF2G630552509	17833487	C	G	0.146974	2.47032	0.00338597	C1orf21	intron_variant
17	TIGRP2P233558_rs8623446	50270959	G	A	0.339337	2.46936	0.00339343	EXOC6B	intron_variant
21	BICF2G630657593	11572735	A	G	0.356628	2.46846	0.00340045	GRM5-ENSCAFG00000004384	intergenic_region
21	BICF2G630657607	11547161	A	G	0.35951	2.46837	0.00340119	GRM5-ENSCAFG00000004384	intergenic_region
6	BICF2S23016168	24866755	G	A	0.186599	2.46612	0.00341887	ENSCAFG00000024109	intron_variant
25	BICF2G630100998	35673365	A	G	0.156566	2.46611	0.00341892	GFRA2-5S_rRNA	intergenic_region
17	BICF2S23756541	3287888	G	A	0.0699856	2.46482	0.00342908	U1-U6	intergenic_region
6	BICF2P242526	71594911	A	G	0.0785303	2.46353	0.00343926	LHX8-TYW3	intergenic_region
24	BICF2G630499066	34843657	C	A	0.372294	2.46322	0.00344177	SULF2-PREX1	intergenic_region
6	BICF2P822850	14010081	C	A	0.114327	2.46156	0.00345497	SDK1-CARD11	intergenic_region
1	BICF2P653927	87584256	G	A	0.105187	2.4605	0.00346334	ENSCAFG00000028932-C9orf135	intergenic_region
21	BICF2G630654640	15332349	A	G	0.0612392	2.4595	0.0034714	DLG2	intron_variant
11	BICF2S23022653	60366483	G	A	0.285303	2.45816	0.00348206	ENSCAFG00000002674-U6	intergenic_region
19	BICF2G630256607	49418569	A	G	0.376081	2.45796	0.00348372	U6-ACVR2A	intergenic_region
4	BICF2P573769	25567534	G	A	0.308081	2.45727	0.00348925	COMTD1-ZNF503	intergenic_region
11	BICF2G630303060	61985844	A	G	0.139653	2.45704	0.00349108	TMEM38B-ZNF462	intergenic_region
17	BICF2P539598	3395551	A	G	0.0692641	2.45694	0.00349186	U6-ENSCAFG00000028777	intergenic_region
1	BICF2P298988	87710489	G	A	0.0770893	2.45655	0.00349506	PTAR1	intron_variant
17	BICF2P1373759	3325164	A	G	0.0698847	2.45648	0.00349561	U1-U6	intergenic_region
17	BICF2P191625	3348304	A	G	0.0698847	2.45648	0.00349561	U1-U6	intergenic_region
13	BICF2S23327747	51914355	A	G	0.392651	2.4498	0.00354976	SNORA62-U6	intergenic_region
11	BICF2G630304531	63408987	A	G	0.363242	2.44937	0.00355331	ENSCAFG00000026792-ACTL7B	intergenic_region
19	BICF2P233163	42512867	A	G	0.396974	2.44876	0.00355828	LRP1B	intron_variant
4	BICF2P666014	12032400	A	T	0.396552	2.44736	0.00356976	CCDC6	intron_variant
1	BICF2G630708633	8075592	A	C	0.0972622	2.44581	0.00358255	ENSCAFG00000000035	upstream_gene_variant
19	BICF2G63036980	13995428	A	G	0.266571	2.44549	0.00358514	U6-ENSCAFG00000003946	intergenic_region
9	BICF2G630474517	59273775	G	A	0.188761	2.44539	0.00358599	DENND1A	intron_variant
6	TIGRP2P81992_rs9139791	38481317	G	A	0.390332	2.44185	0.00361532	PDPK1-ENSCAFG00000019360	intergenic_region
14	BICF2P1062280	42253356	C	A	0.110951	2.44179	0.00361581	CHN2	intron_variant
6	BICF2P520673	13990813	G	A	0.106628	2.44122	0.00362061	SDK1-CARD11	intergenic_region
4	BICF2S23618684	82822268	A	G	0.113833	2.44015	0.00362949	CDH12	intron_variant
13	BICF2S23222210	42456241	C	A	0.381124	2.43997	0.00363099	GABRA2	intron_variant
17	TIGRP2P233003_rs9245724	48121204	A	G	0.146974	2.43931	0.00363655	TACR1	intron_variant
17	BICF2G630205509	48105009	A	G	0.0792507	2.4382	0.00364588	TACR1	intron_variant
29	BICF2G630635590	41713471	A	G	0.315751	2.43742	0.00365239	MTDH	intron_variant
21	BICF2G630657979	11006275	A	C	0.214286	2.43529	0.00367036	GRM5	intron_variant
11	BICF2P998323	52533862	G	A	0.154179	2.43457	0.00367643	RECK	intron_variant
10	BICF2P484831	7987200	G	A	0.428674	2.4345	0.00367708	MSRB3	intron_variant
5	BICF2P906919	12990799	G	A	0.419308	2.43366	0.00368415	TBCEL	intron_variant
22	BICF2G630326533	29524254	G	A	0.381844	2.43349	0.0036856	LMO7	intron_variant
4	BICF2G630172200	80879548	G	A	0.152738	2.43305	0.00368938	7SK-CDH10	intergenic_region
13	BICF2G630746086	64676365	A	G	0.360231	2.42788	0.00373351	0	0
5	BICF2S23655756	60063887	A	G	0.0756484	2.42781	0.00373414	CHD5	intron_variant
6	BICF2P436603	36008867	A	G	0.339337	2.42535	0.00375537	ENSCAFG00000019087-ENSCAFG00000019089	intergenic_region
5	BICF2P573035	60029234	A	G	0.0770893	2.42307	0.00377507	CHD5	downstream_gene_variant
5	BICF2S22929699	60049801	G	A	0.0770893	2.42307	0.00377507	HES2	downstream_gene_variant
12	BICF2P1283564	27497776	A	G	0.395533	2.42242	0.00378081	EYS-U6	intergenic_region
8	BICF2P1084483	54764133	G	A	0.351585	2.42206	0.00378392	5S_rRNA-5S_rRNA	intergenic_region
7	BICF2P1064543	77751430	A	G	0.498559	2.4216	0.00378791	AFG3L2	intron_variant
1	G61f40S219	87963670	G	A	0.15634	2.41972	0.00380434	APBA1	intron_variant
30	BICF2G630403406	27169743	G	C	0.287572	2.41961	0.00380527	ENSCAFG00000024545-TLN2	intergenic_region
16	BICF2S23454118	58191772	A	G	0.205331	2.41923	0.00380866	U6-MCPH1	intergenic_region
14	TIGRP2P187165_rs8583101	17221929	A	G	0.0652174	2.41683	0.00382972	FZD1-MTERF	intergenic_region
9	BICF2S2314648	63486227	A	G	0.35879	2.4163	0.00383443	0	0
21	BICF2G630642466	49105358	G	A	0.399856	2.41435	0.00385166	U6-U6	intergenic_region
11	BICF2P411826	47395809	A	G	0.113276	2.41177	0.00387466	ENSCAFG00000001731-ENSCAFG00000001734	intergenic_region
30	BICF2P743607	11615578	C	G	0.258646	2.40993	0.00389111	SHF-U6	intergenic_region
11	BICF2P276238	72945483	A	C	0.103746	2.40921	0.00389754	BRINP1-RPL7	intergenic_region
23	TIGRP2P304978_rs8887826	37148088	G	A	0.201729	2.4084	0.00390481	SPSB4-ACPL2	intergenic_region
28	BICF2S23340306	31290669	G	A	0.444444	2.40838	0.00390495	WDR11-FGFR2IIIC	intergenic_region
15	BICF2P105070	22306163	A	G	0.477666	2.40815	0.00390704	PPP1R12A	intron_variant
19	TIGRP2P268190_rs9104148	46909187	A	G	0.326369	2.40613	0.00392524	VIS1-U6	intergenic_region
5	BICF2G63035363	32397199	A	G	0.434971	2.40574	0.00392877	ENSCAFG00000024667	upstream_gene_variant
14	BICF2G630528033	40535558	C	A	0.314841	2.40498	0.00393569	ENSCAFG00000017837-ENSCAFG00000002977	intergenic_region
21	BICF2S22928393	44309779	G	C	0.403319	2.40411	0.00394359	GAS2	intron_variant
34	BICF2P135711	9932001	G	A	0.427233	2.4031	0.00395275	IRX1-IRX2	intergenic_region
5	BICF2P546213	26142906	A	C	0.493304	2.4012	0.00397005	ENSCAFG00000001472-AASDHPPT	intergenic_region
11	BICF2S23346186	37128421	A	G	0.497839	2.40109	0.00397106	ENSCAFG00000032537-CNTLN	intergenic_region
7	BICF2S23020309	52286125	A	C	0.179395	2.3992	0.00398837	U6-KIAA1328	intergenic_region
1	TIGRP2P11586_rs9190884	88988431	A	C	0.459654	2.39841	0.00399571	PGM5	missense_variant
8	BICF2P886427	21819953	A	G	0.146974	2.39734	0.0040055	U6-FSCB	intergenic_region
7	BICF2P1088803	20833557	G	A	0.412104	2.39707	0.00400804	FAM20B-RALGPS2	intergenic_region
26	BICF2P224373	27339111	A	T	0.250364	2.3955	0.00402256	ENSCAFG00000031196-ENSCAFG00000015176	intergenic_region
14	BICF2S23124676	47306071	A	T	0.420749	2.39483	0.00402871	HERPUD2-SEPT7	intergenic_region
13	BICF2S2377246	55320186	A	G	0.189755	2.39403	0.00403615	TECRL	intron_variant
13	BICF2G630608052	15123308	G	A	0.326369	2.39214	0.00405377	TRPS1	intron_variant
31	BICF2S23314845	15738875	G	A	0.432997	2.39183	0.00405664	U6-U6	intergenic_region
3	BICF2G630356455	89623082	A	G	0.106628	2.39181	0.00405686	RPL7A-ENSCAFG00000016642	intergenic_region
25	BICF2S23728316	15287882	G	A	0.270331	2.39142	0.0040605	SACS	missense_variant
30	BICF2S23440312	35363080	A	G	0.114553	2.39072	0.00406708	THSD4-MYO9A	intergenic_region
4	TIGRP2P57026_rs8641993	3116383	A	G	0.198127	2.38886	0.00408452	RYR2-MTR	intergenic_region
14	BICF2S23030953	55473926	C	A	0.414986	2.38857	0.00408725	CAV1	intron_variant
13	BICF2S23331765	46152604	A	G	0.321326	2.38779	0.00409462	LNX1	intron_variant
2	BICF2P653439	84451162	A	G	0.17219	2.38694	0.00410257	MTHFR	intron_variant
5	BICF2P549810	20415213	A	G	0.0939306	2.38598	0.00411165	NCAM1-U4	intergenic_region
36	BICF2P355341	15579739	A	G	0.448127	2.38461	0.00412472	TLK1	intron_variant
17	BICF2G630205680	47981175	A	G	0.221182	2.3833	0.00413714	EVA1A-ENSCAFG00000026547	intergenic_region
31	BICF2G630738116	27515748	A	G	0.463256	2.3825	0.00414475	C31H21orf62-OLIG2	intergenic_region
6	BICF2P816740	30669336	A	G	0.331412	2.38234	0.0041463	SNX29	intron_variant
21	BICF2P282441	46378324	G	A	0.177954	2.38183	0.0041512	ENSCAFG00000001197-U6	intergenic_region
22	BICF2S2368084	56803810	C	A	0.138329	2.38078	0.0041612	ENSCAFG00000029765-ENSCAFG00000005316	intergenic_region
8	TIGRP2P108121_rs8746115	18508812	A	G	0.372478	2.37994	0.00416925	FBXO33-ENSCAFG00000008462	intergenic_region
1	BICF2P709806	120441349	C	A	0.355187	2.37911	0.00417726	TSHZ3	intron_variant
4	BICF2S2358412	67578011	A	C	0.394092	2.3753	0.00421405	ENSCAFG00000023056-FBXO4	intergenic_region
6	BICF2P642986	10516282	A	C	0.286265	2.37445	0.00422233	ENSCAFG00000015164	synonymous_variant
17	BICF2G630205276	48470904	A	C	0.236652	2.3738	0.00422864	SEMA4F	downstream_gene_variant
10	BICF2P221274	65970655	A	G	0.274815	2.37303	0.00423617	MEIS1-ENSCAFG00000026704	intergenic_region
4	BICF2P882300	50773540	A	G	0.0799712	2.37244	0.0042419	ADRA1B-IL12B	intergenic_region
32	BICF2P678955	10818704	A	G	0.0615051	2.37175	0.00424868	SPARCL1	downstream_gene_variant
16	BICF2P953037	39814802	A	G	0.173631	2.37077	0.00425828	U6-ENSCAFG00000031006	intergenic_region
15	BICF2P360394	38551281	G	A	0.32853	2.37072	0.00425872	ANKS1B	intron_variant
21	BICF2G630658532	9711224	A	G	0.347983	2.37016	0.00426426	ENSCAFG00000025134-SNORA72	intergenic_region
13	BICF2G630609340	16807766	A	G	0.237032	2.36987	0.00426707	SLC30A8-MED30	intergenic_region
24	TIGRP2P311319_rs9246586	15001812	A	G	0.265512	2.36939	0.00427179	HAO1-BMP2	intergenic_region
12	TIGRP2P163310_rs8800105	36710790	G	A	0.402738	2.36896	0.00427606	ENSCAFG00000002667-COL12A1	intergenic_region
31	BICF2S23053387	31715794	C	A	0.164265	2.36868	0.00427881	CLDN14-SIM2	intergenic_region
10	BICF2P136377	65943806	A	G	0.231988	2.36839	0.00428166	MEIS1-ENSCAFG00000026704	intergenic_region
10	BICF2P497221	65955312	G	A	0.231988	2.36839	0.00428166	MEIS1-ENSCAFG00000026704	intergenic_region
6	BICF2P1175380	8891211	G	A	0.183983	2.36795	0.004286	TRIP6	downstream_gene_variant
15	BICF2P689284	52779481	G	A	0.314121	2.36736	0.00429181	RBM46-ENSCAFG00000008476	intergenic_region
6	BICF2S23652505	10762282	A	G	0.131844	2.36703	0.00429507	TMEM130-NPTX2	intergenic_region
7	BICF2P810214	29780253	G	A	0.0792507	2.36614	0.00430389	ENSCAFG00000027887-DPT	intergenic_region
7	BICF2P464381	32744200	A	G	0.478386	2.36421	0.00432308	RGS7-FH	intergenic_region
31	BICF2G630731874	13718896	A	T	0.262968	2.36394	0.00432573	U6-ENSCAFG00000031557	intergenic_region
12	TIGRP2P156834_rs8791406	12567352	A	C	0.172911	2.36363	0.00432879	TMEM63B	synonymous_variant
12	BICF2P645563	68587326	A	G	0.466138	2.36252	0.00433986	LAMA4	intron_variant
6	BICF2S23217563	66095723	A	G	0.447826	2.36246	0.00434048	U6-U12	intergenic_region
37	BICF2P769377	25376314	G	C	0.110951	2.36171	0.00434797	CYP27A1	intron_variant
14	BICF2P1150712	47535448	G	A	0.291066	2.361	0.00435509	SEPT7-EEPD1	intergenic_region
4	BICF2G630172806	81496331	G	A	0.231214	2.36049	0.00436027	ENSCAFG00000019017-ENSCAFG00000019023	intergenic_region
1	BICF2G630719454	37363764	A	G	0.21645	2.36043	0.00436086	GRM1	intron_variant
3	BICF2G630355828	88989230	G	A	0.369597	2.35977	0.00436743	SLIT2	intron_variant
10	BICF2P1265074	59524313	G	A	0.350434	2.35925	0.00437269	FANCL-BCL11A	intergenic_region
9	BICF2G630836158	37765579	G	A	0.074928	2.35826	0.00438271	ENSCAFG00000031869	intron_variant
1	BICF2P1016191	88981351	A	G	0.476912	2.35782	0.00438708	PGM5	intron_variant
4	BICF2S22912580	18610924	G	A	0.25	2.35777	0.00438759	LRRTM3-ENSCAFG00000024412	intergenic_region
27	BICF2S23410943	42251847	A	C	0.105339	2.35677	0.00439779	IQSEC3	intron_variant
15	BICF2S23229037	66299884	G	A	0.246398	2.35669	0.00439854	0	0
7	BICF2P1436700	25733140	G	A	0.329251	2.35632	0.00440233	PRDX6-TNFSF4	intergenic_region
19	BICF2S23534670	12583172	G	A	0.126801	2.35457	0.00442005	JADE1-ENSCAFG00000030590	intergenic_region
36	BICF2P1181603	16192796	A	G	0.256223	2.35451	0.00442067	SLC25A12	intron_variant
7	BICF2P278276	15565575	A	G	0.380403	2.35437	0.00442216	ZNF648-GLUL	intergenic_region
12	BICF2P887512	42273911	A	G	0.165706	2.35382	0.00442771	FAM46A	3_prime_UTR_variant
34	BICF2P1190726	5962412	A	T	0.465368	2.34998	0.00446702	ENSCAFG00000031045-MTRR	intergenic_region
6	BICF2P977588	36770244	G	A	0.0943804	2.34945	0.00447246	MGRN1-UBALD1	intergenic_region
4	BICF2S23728918	88164665	A	G	0.301153	2.34862	0.00448105	ANKH	intron_variant
12	TIGRP2P160335_rs9096705	24207899	G	C	0.161383	2.34819	0.00448548	BEND6	intron_variant
12	TIGRP2P170620_rs9184414	64911803	A	G	0.432997	2.34746	0.00449299	SCML4	intron_variant
35	BICF2P1392238	28051040	A	G	0.227666	2.34715	0.00449626	0	0
18	BICF2P568627	10001548	G	A	0.143786	2.34655	0.00450248	Y_RNA-U6	intergenic_region
18	BICF2G630690502	49336559	A	C	0.147695	2.34633	0.00450476	PPP6R3	intron_variant
29	BICF2G630632855	36788113	G	A	0.0945166	2.34558	0.00451249	SLC26A7-RUNX1T1	intergenic_region
16	BICF2P1287095	47597290	A	G	0.342219	2.34522	0.00451623	TENM3	intron_variant
21	BICF2P1113480	11583526	A	C	0.330692	2.34511	0.00451737	GRM5-ENSCAFG00000004384	intergenic_region
28	BICF2P917904	16325572	G	A	0.272334	2.34462	0.00452254	SLK	intron_variant
11	BICF2P1343522	58347609	A	G	0.207071	2.34356	0.00453356	GRIN3A	intron_variant
11	BICF2S23330011	54029961	A	G	0.169308	2.34209	0.00454898	FRMPD1	intron_variant
12	BICF2P624104	12731690	C	A	0.262248	2.33987	0.00457225	U6	downstream_gene_variant
17	BICF2G630222514	10929277	A	G	0.0504323	2.33934	0.00457786	ENSCAFG00000028075-NBAS	intergenic_region
17	BICF2G630222484	11004874	G	A	0.0504323	2.33934	0.00457786	ENSCAFG00000028075-NBAS	intergenic_region
36	BICF2S23228234	28678080	C	A	0.389769	2.33627	0.00461028	FSIP2-ZC3H15	intergenic_region
5	BICF2P1364834	11709571	A	G	0.110951	2.33534	0.00462017	UBASH3B-cfa-mir-99a-2	intergenic_region
33	BICF2S23448778	12387777	G	A	0.448127	2.33344	0.0046405	CBLB-ENSCAFG00000027807	intergenic_region
28	BICF2P238890	41937074	G	A	0.337176	2.3326	0.00464943	0	0
16	BICF2G630114647	35974623	A	G	0.448773	2.3298	0.00467952	ENSCAFG00000025394-ENSCAFG00000006745	intergenic_region
34	BICF2P326497	5613889	A	G	0.0504323	2.32963	0.00468131	ENSCAFG00000031045	downstream_gene_variant
3	TIGRP2P49969_rs8871623	68454861	A	G	0.125541	2.32936	0.0046843	3OST1-CLNK	intergenic_region
7	BICF2G630550026	10373593	A	G	0.270173	2.32907	0.00468736	DTL-PPP2R5A	intergenic_region
9	BICF2G630836268	37936717	A	G	0.065562	2.32795	0.00469944	RASL10B	upstream_gene_variant
21	BICF2G630659164	7339400	A	C	0.190202	2.32725	0.00470705	CCDC67-SLC36A4	intergenic_region
4	BICF2G630175986	85205146	A	G	0.159222	2.32608	0.00471972	CDH18-SNORA62	intergenic_region
26	BICF2P227304	25436480	A	G	0.378963	2.32596	0.00472108	ENSCAFG00000024720	intron_variant
3	BICF2G630361725	93970062	A	C	0.146465	2.32454	0.00473654	0	0
4	BICF2P712893	51293540	A	G	0.189481	2.3243	0.00473914	RNF145	intron_variant
16	BICF2G630843394	12074287	A	G	0.204611	2.32375	0.00474517	ENSCAFG00000030652-U6	intergenic_region
7	BICF2S23041291	18622814	A	G	0.149135	2.32259	0.00475786	IVNS1ABP-HMCN1	intergenic_region
36	TIGRP2P416162_rs8711127	5145590	A	G	0.469697	2.32224	0.00476171	BAZ2B	intron_variant
20	BICF2P491073	27801466	A	G	0.348703	2.32217	0.00476245	SYNPR	intron_variant
14	BICF2P743485	49851902	C	A	0.427954	2.32144	0.00477046	SNORD116-ENSCAFG00000003294	intergenic_region
4	BICF2S23311792	15973961	C	A	0.100865	2.32014	0.00478471	REEP3-CTNNA3	intergenic_region
14	BICF2P1362481	32079457	G	A	0.262248	2.32002	0.00478606	ENSCAFG00000002452-ENSCAFG00000002455	intergenic_region
32	BICF2P928136	26978204	G	A	0.172911	2.31999	0.00478645	TBCK	intron_variant
28	BICF2P912171	33528472	A	C	0.220461	2.31991	0.0047873	CPXM2	intron_variant
16	BICF2P1299193	19819303	A	G	0.484848	2.31889	0.00479855	ENSCAFG00000005174	intron_variant
20	BICF2P768103	28595379	C	A	0.409942	2.31859	0.00480182	CADPS	intron_variant
32	BICF2P1146448	29132178	G	A	0.168588	2.31819	0.00480627	COL25A1	intron_variant
28	BICF2G630265491	35466860	A	G	0.411765	2.31656	0.00482431	ADAM12	intron_variant
12	TIGRP2P156941_rs9154550	12707475	G	A	0.204052	2.31574	0.00483343	TCTE1	upstream_gene_variant
12	BICF2P874306	42627990	G	A	0.164493	2.31536	0.00483769	FAM46A-IBTK	intergenic_region
9	BICF2G630836177	37779346	A	G	0.064121	2.31532	0.00483816	CCL14	upstream_gene_variant
9	BICF2G630836211	37813264	C	G	0.064121	2.31532	0.00483816	CCL5	upstream_gene_variant
9	BICF2G630836219	37825061	G	A	0.064121	2.31532	0.00483816	C17orf66	5_prime_UTR_variant
5	BICF2P1310468	87780446	G	A	0.43732	2.31459	0.00484635	CDH8-ENSCAFG00000028545	intergenic_region
15	BICF2G630416990	67131920	A	G	0.399135	2.31451	0.00484714	0	0
1	BICF2S23712293	51775979	A	G	0.0670029	2.3145	0.00484725	ENSCAFG00000000770-QKI	intergenic_region
3	TIGRP2P55431_rs9116380	88893816	A	G	0.186599	2.31373	0.00485591	PACRGL	downstream_gene_variant
1	BICF2S22925266	100633549	A	G	0.478355	2.31218	0.00487323	ENSCAFG00000031784	upstream_gene_variant
6	TIGRP2P80294_rs9255675	22128687	A	C	0.332612	2.31173	0.00487831	CHP2	3_prime_UTR_variant
1	BICF2P503349	120434952	A	G	0.190751	2.31117	0.00488457	TSHZ3	intron_variant
29	BICF2S23245248	34747168	A	G	0.341499	2.31104	0.00488608	U6-ENSCAFG00000008943	intergenic_region
21	BICF2S23746000	14071457	A	G	0.15562	2.30991	0.00489878	TMEM126B-U6	intergenic_region
5	BICF2G630182500	34032870	A	G	0.175325	2.30965	0.00490175	STX8	intron_variant
18	BICF2P857729	46544094	A	G	0.210375	2.30886	0.00491071	KCNQ1	intron_variant
2	BICF2P294415	36400275	A	G	0.31268	2.30852	0.00491449	PCDHGC5	intron_variant
29	BICF2G630630528	34245357	A	G	0.384006	2.30843	0.00491554	MMP16-ENSCAFG00000029124	intergenic_region
24	BICF2P490445	30156007	A	G	0.378242	2.30705	0.00493115	PTPRT	intron_variant
1	BICF2P823389	87532748	A	G	0.0677233	2.30691	0.00493276	ENSCAFG00000028932-C9orf135	intergenic_region
21	BICF2S22924022	11064519	G	A	0.45245	2.30684	0.0049336	GRM5	intron_variant
8	BICF2P991250	11136911	G	A	0.115274	2.30675	0.00493454	ENSCAFG00000029524-ARHGAP5	intergenic_region
7	BICF2S23043416	55750174	A	C	0.252193	2.30515	0.00495275	NOL4	intron_variant
34	BICF2G630452949	35579182	A	G	0.194084	2.30383	0.00496783	TNIK	intron_variant
30	BICF2G630401652	29015321	A	G	0.134006	2.3035	0.00497169	ZNF609	intron_variant
5	BICF2S22938380	8897619	G	A	0.354467	2.30331	0.00497386	CHEK1	intron_variant
6	BICF2P908268	13951377	A	G	0.430836	2.3021	0.00498767	SDK1-CARD11	intergenic_region
17	BICF2G630204636	49054471	A	G	0.427233	2.30115	0.00499862	TET3	intron_variant
6	BICF2S23347682	68256055	A	T	0.118156	2.30007	0.00501101	ELTD1-U6	intergenic_region
29	BICF2G630630994	34767711	A	G	0.271614	2.29992	0.00501279	U6-ENSCAFG00000008943	intergenic_region
33	BICF2G630247621	11079553	A	G	0.425793	2.29858	0.00502827	ENSCAFG00000026602	downstream_gene_variant
38	TIGRP2P424571_rs9029826	18485459	A	G	0.126801	2.29834	0.00503107	PBX1	intron_variant
21	BICF2G630654260	15704857	G	A	0.358696	2.29808	0.00503406	DLG2	intron_variant
32	BICF2G630599285	9618701	A	G	0.0684438	2.29772	0.00503831	MAPK10	missense_variant
32	BICF2G630599277	9620862	C	G	0.0684438	2.29772	0.00503831	MAPK10	intron_variant
8	BICF2P89175	56086088	C	A	0.429395	2.29749	0.00504095	U6-ENSCAFG00000017323	intergenic_region
18	BICF2P1267876	9996030	A	G	0.143372	2.29744	0.00504149	Y_RNA-U6	intergenic_region
1	TIGRP2P4962_rs9134723	61382157	G	A	0.431556	2.29696	0.00504708	ENSCAFG00000000960-U6	intergenic_region
12	BICF2P171841	17582614	G	A	0.45245	2.29642	0.00505333	CRISP2	intron_variant
33	BICF2G630246650	9200532	G	A	0.105908	2.29578	0.00506086	7SK-ENSCAFG00000009682	intergenic_region
11	BICF2G630307429	73932576	G	A	0.39121	2.29563	0.00506255	ENSCAFG00000032755	intron_variant
17	BICF2S23239183	65030832	C	G	0.340318	2.29506	0.00506924	0	0
12	BICF2P831678	8418935	A	G	0.167867	2.295	0.00506986	KIF6	intron_variant
26	BICF2S2368845	20461129	A	G	0.0914986	2.29446	0.00507626	MIAT_exon5_3-ENSCAFG00000026840	intergenic_region
15	BICF2G630443418	13950232	A	C	0.10951	2.29425	0.00507871	DMBX1-ENSCAFG00000004242	intergenic_region
13	BICF2P601033	60482461	G	A	0.0698847	2.29414	0.00507998	SLC4A4	intron_variant
31	BICF2P1176740	32560801	C	A	0.466859	2.29336	0.0050891	DYRK1A	upstream_gene_variant
2	BICF2P1305300	41573503	A	G	0.179395	2.29312	0.00509185	PPP2R2B-STK32A	intergenic_region
13	BICF2G630610300	19748127	A	G	0.32853	2.29035	0.00512454	ENSCAFG00000000961-5S_rRNA	intergenic_region
12	BICF2P706785	66147357	G	A	0.235591	2.2889	0.00514159	CEP57L1-ENSCAFG00000029315	intergenic_region
11	BICF2P1293369	46216701	A	G	0.210678	2.28878	0.00514299	5S_rRNA-cfa-mir-876	intergenic_region
4	BICF2S22938930	19241111	A	G	0.402738	2.28876	0.0051433	HERC4	intron_variant
22	TIGRP2P297829_rs8506459	59922111	A	C	0.134921	2.28847	0.00514673	SOX1-ENSCAFG00000031412	intergenic_region
4	BICF2G63057780	8258918	A	G	0.139049	2.28499	0.00518812	TRIM67	synonymous_variant
10	BICF2P509550	62526738	G	A	0.277378	2.28321	0.00520945	EHBP1	intron_variant
21	BICF2S23715114	10214449	C	A	0.247118	2.28307	0.00521114	NAALAD2	intron_variant
26	BICF2P509571	27030275	G	A	0.373919	2.28242	0.00521889	ENSCAFG00000032706-ENSCAFG00000013587	intergenic_region
1	BICF2P1068000	103588996	A	G	0.289322	2.28219	0.00522165	ENSCAFG00000002723	intron_variant
21	BICF2G630658090	10617241	G	A	0.316282	2.28181	0.00522628	NOX4	intron_variant
20	BICF2P908983	34132662	A	G	0.12718	2.28096	0.00523653	ERC2	intron_variant
31	BICF2S23537847	27290589	G	A	0.0911722	2.28064	0.00524032	C21orf59	downstream_gene_variant
7	BICF2P1268962	20862189	A	G	0.440115	2.28048	0.00524223	FAM20B-RALGPS2	intergenic_region
12	BICF2P257319	66786263	T	A	0.0918836	2.28024	0.00524514	GPR6-WASF1	intergenic_region
5	BICF2P1182500	26923050	A	G	0.261527	2.28019	0.00524577	GRIA4-CASP4	intergenic_region
6	BICF2S23729890	11375391	T	A	0.17219	2.28014	0.00524634	ENSCAFG00000015477	intron_variant
23	BICF2G630379357	26492544	A	G	0.0958213	2.27823	0.00526945	OXNAD1	intron_variant
7	BICF2P1220643	14965844	A	C	0.332357	2.27817	0.00527022	CACNA1E	intron_variant
1	BICF2P872985	23005626	C	A	0.0842939	2.27773	0.00527553	DCC-ENSCAFG00000030017	intergenic_region
4	BICF2P56204	57227595	G	A	0.488473	2.27584	0.00529856	NMUR2-GLRA1	intergenic_region
16	BICF2P1442214	39950156	A	G	0.206772	2.27358	0.00532628	U6-ENSCAFG00000031006	intergenic_region
12	TIGRP2P161562_rs8916539	30006646	A	G	0.427746	2.27295	0.00533402	U2-ENSCAFG00000002522	intergenic_region
34	BICF2P940082	4101768	A	G	0.0808081	2.27202	0.00534536	FAM173B-7SK	intergenic_region
5	BICF2S23650339	8849907	C	A	0.376623	2.27185	0.00534755	ACRV1	intron_variant
1	BICF2G630790065	97351649	A	G	0.426513	2.27033	0.0053662	SPIN1	downstream_gene_variant
30	BICF2S23315057	9875733	A	G	0.110231	2.26933	0.00537866	UBR1	intron_variant
31	BICF2P798072	10412312	A	G	0.148415	2.26912	0.00538127	ENSCAFG00000007980-ENSCAFG00000007984	intergenic_region
6	BICF2S2316921	29604620	A	G	0.213256	2.26865	0.00538699	ENSCAFG00000031194-ENSCAFG00000029951	intergenic_region
33	BICF2P962554	11990211	G	A	0.394092	2.26864	0.00538722	CBLB-ENSCAFG00000027807	intergenic_region
6	BICF2P85413	73141149	A	G	0.45671	2.26842	0.00538986	7SK-NEGR1	intergenic_region
14	BICF2S2372933	35071338	C	A	0.111111	2.26816	0.00539317	ABCB5-U6	intergenic_region
5	BICF2P94109	34157574	G	A	0.302309	2.26522	0.00542974	USP43	intron_variant
1	BICF2S2294062	75615522	A	G	0.204611	2.26517	0.00543033	KIF27	intron_variant
6	BICF2S22919682	70389307	G	A	0.40634	2.26491	0.00543358	ST6GALNAC3-ASB17	intergenic_region
13	BICF2G630608012	15099980	G	A	0.260086	2.26419	0.00544263	TRPS1	intron_variant
20	BICF2S23712145	10478031	A	G	0.159913	2.26418	0.00544279	GRM7	intron_variant
1	BICF2P555035	64617175	G	A	0.223343	2.26313	0.00545589	U6-HEY2	intergenic_region
1	BICF2P989675	64623878	A	G	0.223343	2.26313	0.00545589	U6-HEY2	intergenic_region
28	BICF2P971747	9316343	A	G	0.118876	2.26239	0.00546527	ENSCAFG00000008439	intron_variant
30	BICF2G630408536	20100103	A	G	0.455331	2.26149	0.0054766	UNC13C	downstream_gene_variant
17	TIGRP2P230298_rs9212829	39375293	G	A	0.142651	2.26128	0.00547919	ENSCAFG00000031333-SFTPB	intergenic_region
31	BICF2P509053	38754331	A	G	0.147908	2.26102	0.0054825	ADARB1	intron_variant
21	BICF2G630658743	8053888	G	A	0.306196	2.261	0.00548278	FAT3	intron_variant
11	BICF2S23159756	36283882	G	A	0.279326	2.2602	0.00549289	ENSCAFG00000032301-BNC2	intergenic_region
13	BICF2S23624321	52474635	C	A	0.394092	2.25895	0.00550868	U6-ENSCAFG00000032523	intergenic_region
4	BICF2G630172752	81475566	G	A	0.161616	2.2589	0.00550938	ENSCAFG00000019017-ENSCAFG00000019023	intergenic_region
12	BICF2P1326357	26266309	C	A	0.195245	2.25864	0.00551267	KHDRBS2-ENSCAFG00000002473	intergenic_region
1	BICF2P259582	65110552	G	A	0.23487	2.25854	0.00551391	TRMT11-CENPW	intergenic_region
28	BICF2P505231	28412591	A	G	0.0886167	2.25704	0.00553302	RAB11FIP2	downstream_gene_variant
18	BICF2P1333141	27636108	T	A	0.354467	2.25685	0.00553535	7SK-U1	intergenic_region
15	BICF2G630443401	13961032	G	A	0.0994236	2.25649	0.00553995	DMBX1-ENSCAFG00000004242	intergenic_region
25	BICF2S23135796	48992407	G	A	0.35879	2.25569	0.00555019	ASB1-TWIST2	intergenic_region
4	BICF2P908208	40401547	A	G	0.219741	2.25506	0.00555833	FBXW11-SMIM23	intergenic_region
1	BICF2P1234455	87170654	A	C	0.119597	2.25482	0.00556134	KLF9-SMC5	intergenic_region
17	BICF2P340384	39412459	G	A	0.154401	2.25439	0.00556688	ENSCAFG00000031333-SFTPB	intergenic_region
20	BICF2P462156	32754282	G	A	0.263689	2.25409	0.00557067	SLMAP-ENSCAFG00000027611	intergenic_region
7	BICF2P484843	48885877	A	G	0.0619597	2.2531	0.00558339	ENSCAFG00000017739	upstream_gene_variant
12	G731f67S101	24593050	A	C	0.259019	2.25284	0.00558682	PRIM2	intron_variant
9	BICF2P947825	29904024	A	G	0.119597	2.25102	0.00561021	U6-7SK	intergenic_region
1	BICF2P582972	65149894	A	G	0.237374	2.25092	0.00561157	TRMT11-CENPW	intergenic_region
1	BICF2P302670	65889367	A	G	0.417749	2.25062	0.00561536	RSPO3	intron_variant
32	BICF2G630594572	20818457	A	G	0.256484	2.25048	0.00561723	TSPAN5	intron_variant
18	BICF2P111891	48735682	G	A	0.231268	2.25031	0.00561934	CCND1-TPCN2	intergenic_region
18	TIGRP2P255169_rs9193849	48737133	G	A	0.231268	2.25031	0.00561934	CCND1-TPCN2	intergenic_region
18	BICF2P578328	48773543	C	A	0.231268	2.25031	0.00561934	CCND1-TPCN2	intergenic_region
12	BICF2P293983	29078487	A	G	0.0533141	2.24941	0.00563106	ENSCAFG00000023580-SNORA62	intergenic_region
11	BICF2G630304317	63222505	G	A	0.348703	2.24941	0.00563109	ENSCAFG00000026792-ACTL7B	intergenic_region
33	BICF2P238800	15605908	A	G	0.402597	2.24939	0.00563127	ENSCAFG00000010335-PVRL3	intergenic_region
1	BICF2P387293	93984526	A	G	0.39121	2.24921	0.00563366	ERMP1-SPATA31E1	intergenic_region
28	BICF2S23253999	19085030	T	A	0.139912	2.24881	0.00563882	SORCS1-U4	intergenic_region
35	BICF2P330952	11428274	G	A	0.12464	2.24858	0.00564178	U6-HIVEP1	intergenic_region
6	BICF2G630572402	68926540	A	G	0.500722	2.24833	0.0056451	FUBP1	intron_variant
4	TIGRP2P63464_rs8770552	55672489	A	G	0.483357	2.24732	0.00565823	FAM114A2-GRIA1	intergenic_region
6	BICF2S23329890	14392873	G	A	0.248559	2.2466	0.0056676	GNA12	intron_variant
5	BICF2P720245	12669075	G	A	0.301153	2.24643	0.00566986	SORL1-SC5D	intergenic_region
7	BICF2P758526	25318558	G	C	0.440115	2.24458	0.00569403	SERPINC1	upstream_gene_variant
26	BICF2P992425	34908229	A	G	0.443804	2.24418	0.00569926	PCDH15-ENSCAFG00000015550	intergenic_region
28	BICF2G630269062	24794682	A	G	0.45389	2.24372	0.0057053	NHLRC2-ADRB1	intergenic_region
14	BICF2S23117654	48841157	G	A	0.302594	2.24295	0.00571548	ELMO1-GPR141	intergenic_region
6	BICF2G630570756	79178284	A	C	0.473266	2.24173	0.0057315	0	0
9	BICF2G630834299	33895347	G	A	0.398415	2.24146	0.0057351	YPEL2	intron_variant
3	BICF2G630340077	44543893	A	G	0.245677	2.24132	0.00573692	NR2F2-ENSCAFG00000026734	intergenic_region
4	BICF2P83308	20010345	G	A	0.345599	2.24116	0.00573911	STOX1	upstream_gene_variant
28	BICF2G630270313	23497732	A	G	0.0979827	2.24098	0.00574149	ZDHHC6	upstream_gene_variant
17	BICF2S23757441	48459041	G	A	0.409222	2.24064	0.00574592	U2-SEMA4F	intergenic_region
35	BICF2P784529	6016050	A	G	0.451009	2.24019	0.0057519	FARS2-NRN1	intergenic_region
1	BICF2S23720329	29156678	G	A	0.445965	2.23816	0.0057788	MAP3K5	intron_variant
11	BICF2P1253535	55248320	G	A	0.157781	2.23675	0.0057976	ENSCAFG00000031489	synonymous_variant
26	BICF2G630799764	22237133	G	A	0.428674	2.23672	0.00579801	ENSCAFG00000011954-ZNRF3	intergenic_region
9	BICF2S23017379	58938069	G	A	0.394813	2.2364	0.00580236	DENND1A	intron_variant
16	BICF2P632977	27506251	A	G	0.476225	2.23588	0.00580925	GOT1L1	intron_variant
37	BICF2P961555	24146036	G	A	0.24531	2.23481	0.00582355	Pinc-ENSCAFG00000032371	intergenic_region
23	BICF2G630367403	49603786	G	A	0.486311	2.23435	0.00582973	GMPS	intron_variant
12	BICF2P104860	32447914	G	A	0.167867	2.23382	0.0058369	ENSCAFG00000002548	upstream_gene_variant
29	BICF2S2341391	18619219	A	G	0.294669	2.23316	0.00584577	ENSCAFG00000007660-SULF1	intergenic_region
15	BICF2G630434649	30578070	G	A	0.178674	2.23271	0.00585181	ATP2B1	intron_variant
33	BICF2P879471	15909680	G	A	0.129683	2.23212	0.00585974	PVRL3	intron_variant
4	BICF2G630177258	86457147	A	G	0.309798	2.23117	0.00587256	BASP1-FAM134B	intergenic_region
25	BICF2P1461096	49858895	C	G	0.208213	2.2309	0.00587628	ROMO1-NDUFA10	intergenic_region
25	TIGRP2P328865_rs8709447	34874565	A	G	0.293948	2.23042	0.0058828	SLC39A14	upstream_gene_variant
7	BICF2P1441020	18036740	A	G	0.12536	2.22921	0.00589914	FAM129A	intron_variant
7	TIGRP2P91720_rs8552372	18044844	C	A	0.12536	2.22921	0.00589914	FAM129A	intron_variant
20	BICF2P936439	37615435	A	G	0.186147	2.22916	0.00589978	POC1A	intron_variant
5	BICF2P1331127	26933123	A	G	0.270132	2.22914	0.00590014	GRIA4-CASP4	intergenic_region
12	BICF2P132258	36145500	A	C	0.28355	2.22888	0.00590361	CD109-ENSCAFG00000002665	intergenic_region
20	BICF2P797395	36844754	A	C	0.0800866	2.22827	0.00591192	RFT1-SFMBT1	intergenic_region
3	BICF2G630354004	87098004	G	A	0.121758	2.2278	0.00591836	GBA3	intron_variant
21	BICF2G630659116	7365425	G	A	0.389769	2.22731	0.00592501	CCDC67-SLC36A4	intergenic_region
21	BICF2G630659099	7373719	A	G	0.389769	2.22731	0.00592501	CCDC67-SLC36A4	intergenic_region
23	BICF2P409179	39837652	A	G	0.178674	2.22635	0.00593813	C3orf58-ENSCAFG00000008047	intergenic_region
6	BICF2G630570319	79661399	A	G	0.315562	2.22602	0.00594261	0	0
3	BICF2G630338666	40892957	A	G	0.115994	2.22509	0.00595534	ADAMTS17	intron_variant
1	BICF2S23746077	47388140	A	G	0.254323	2.22367	0.00597485	SNX9	intron_variant
1	BICF2P127308	103514982	A	G	0.128963	2.22278	0.00598717	ENSCAFG00000029928	upstream_gene_variant
1	BICF2P165361	103563716	G	A	0.128963	2.22278	0.00598717	ENSCAFG00000002723	intron_variant
1	BICF2P496343	103644528	A	G	0.128963	2.22278	0.00598717	cfa-mir-371-ENSCAFG00000030128	intergenic_region
35	TIGRP2P404552_rs8905682	4279116	G	A	0.386167	2.22211	0.00599642	PRPF4B	intron_variant
22	BICF2G630326480	29466103	G	A	0.299265	2.22196	0.0059984	LMO7	intron_variant
2	BICF2P20216	13139725	G	A	0.230548	2.22133	0.00600712	U6-ENSCAFG00000032136	intergenic_region
26	BICF2G630803502	16814254	A	G	0.103746	2.22109	0.00601043	HNF1	intron_variant
20	BICF2P492693	40866500	G	A	0.334776	2.2209	0.00601314	ENSCAFG00000029616-MAP4	intergenic_region
38	BICF2S22931370	25898545	A	G	0.476945	2.22031	0.00602123	0	0
4	BICF2P852817	53279941	G	A	0.422911	2.21856	0.00604563	SGCD	intron_variant
35	TIGRP2P407860_rs8791075	18711639	G	A	0.498559	2.21851	0.00604627	ID4-ENSCAFG00000031539	intergenic_region
1	BICF2G630720158	38384151	A	T	0.376801	2.2178	0.00605621	STXBP5	intron_variant
1	BICF2G630720165	38389305	A	G	0.376801	2.2178	0.00605621	STXBP5	intron_variant
17	BICF2P176834	56778467	A	C	0.28098	2.21741	0.00606157	ENSCAFG00000030875	intron_variant
17	BICF2S23632368	20496172	C	G	0.2886	2.21637	0.00607611	DRC1	intron_variant
30	BICF2P1400870	17434760	C	G	0.322511	2.21541	0.00608967	LYSMD2-TMOD2	intergenic_region
5	BICF2S23346280	18487145	C	A	0.157287	2.21466	0.00610021	CADM1-ENSCAFG00000026790	intergenic_region
1	TIGRP2P17898_rs9244221	27332052	G	A	0.152738	2.21456	0.00610158	U6-ENSCAFG00000026990	intergenic_region
11	BICF2P815753	61414660	A	G	0.304755	2.21452	0.00610206	FKTN	intron_variant
8	BICF2S23533219	22725138	C	A	0.313401	2.21329	0.00611947	ENSCAFG00000014093-U6	intergenic_region
15	BICF2G630433442	32320032	A	T	0.365801	2.21289	0.00612512	ENSCAFG00000006152-BTG1	intergenic_region
25	BICF2S22948336	23041247	G	A	0.401297	2.2126	0.00612921	ENSCAFG00000007798	intron_variant
7	BICF2G63086496	81426621	A	T	0.0979827	2.21064	0.00615691	0	0
38	BICF2G63066813	25757348	G	A	0.286744	2.20989	0.00616747	0	0
11	BICF2P460649	49532805	G	A	0.325397	2.20927	0.00617627	ENSCAFG00000001742-ACO1	intergenic_region
13	BICF2G630614121	24409046	C	A	0.433718	2.20902	0.00617987	FAM84B-U6	intergenic_region
38	BICF2S23632352	18542570	C	A	0.280664	2.20786	0.00619647	PBX1	intron_variant
19	BICF2S23740315	8653023	A	G	0.425793	2.20692	0.00620987	ENSCAFG00000003779-ENSCAFG00000003785	intergenic_region
3	BICF2G630701035	15618558	G	A	0.320087	2.20545	0.00623096	FAM172A	intron_variant
17	BICF2G630218870	15816594	A	G	0.074928	2.20544	0.00623104	C2orf43-APOB	intergenic_region
26	BICF2S23355909	11363533	A	G	0.445965	2.20393	0.0062527	RBM19-TBX5	intergenic_region
31	BICF2P630812	36062141	A	G	0.148415	2.20375	0.00625529	ENSCAFG00000030700-RIPK4	intergenic_region
8	BICF2P17077	57199568	A	G	0.0533141	2.20338	0.00626059	ENSCAFG00000017325-FLRT2	intergenic_region
21	BICF2G630659220	7276975	A	G	0.179395	2.2021	0.00627912	CCDC67	intron_variant
34	BICF2G630451433	38496219	C	A	0.106628	2.20063	0.00630039	NLGN1-7SK	intergenic_region
4	BICF2P836304	23091582	A	G	0.283141	2.20054	0.00630177	MICU1	intron_variant
20	BICF2P897521	34012935	A	G	0.278098	2.20039	0.00630385	ERC2	intron_variant
36	BICF2P1086980	6672215	G	A	0.182277	2.20012	0.00630781	RBMS1-TANK	intergenic_region
3	BICF2G630705602	32584223	G	C	0.0914986	2.2001	0.00630805	OCA2	intron_variant
38	BICF2S23126165	3017351	A	G	0.275937	2.19995	0.00631026	ENSCAFG00000010290-U6	intergenic_region
8	BICF2P283228	19750279	G	A	0.074928	2.19964	0.0063148	LRFN5-U6	intergenic_region
20	BICF2S23317599	9752207	A	G	0.115994	2.19923	0.00632073	LMCD1-GRM7	intergenic_region
16	BICF2S23160052	19762270	A	G	0.074928	2.19899	0.00632427	UBE3C-ENSCAFG00000005174	intergenic_region
6	TIGRP2P77653_rs9032601	11569936	G	A	0.329971	2.19859	0.00633002	CYTH3	intron_variant
4	BICF2P36282	30849864	G	A	0.324207	2.19765	0.00634377	SH2D4B-5S_rRNA	intergenic_region
13	BICF2G630604277	9876033	A	G	0.279539	2.19613	0.00636601	NUDCD1	intron_variant
11	BICF2S2355132	72852967	A	G	0.113112	2.19588	0.0063697	BRINP1-RPL7	intergenic_region
6	BICF2S23121085	28938587	A	G	0.48487	2.19474	0.00638642	MKL2	intron_variant
25	BICF2G63094997	28660137	C	A	0.268421	2.19442	0.00639117	HMBOX1-INTS9	intergenic_region
26	BICF2P1148613	25964045	G	A	0.235591	2.1943	0.00639299	ENSCAFG00000030602-ENSCAFG00000032078	intergenic_region
1	BICF2P270859	25003827	A	G	0.335735	2.19423	0.00639396	LDLRAD4-MOXD1	intergenic_region
26	BICF2S22911842	23967328	G	A	0.309078	2.19397	0.0063978	MORC2	intron_variant
4	BICF2S23056008	53697581	A	G	0.308357	2.1937	0.00640174	SGCD-ENSCAFG00000030235	intergenic_region
26	BICF2P30954	37170546	A	G	0.385281	2.19363	0.00640275	ENSCAFG00000015602-U6	intergenic_region
15	BICF2P1339574	24628113	G	A	0.399856	2.19269	0.00641663	TMTC2	upstream_gene_variant
8	BICF2P481494	72968861	G	A	0.353026	2.19178	0.00643008	ENSCAFG00000030258	intron_variant
20	TIGRP2P273234_rs8866107	26918937	G	A	0.340058	2.19177	0.00643026	PRICKLE2	intron_variant
14	BICF2G630528092	40601429	A	G	0.45671	2.19151	0.00643416	ENSCAFG00000017837-ENSCAFG00000002977	intergenic_region
22	BICF2P583278	16377554	G	A	0.185159	2.19115	0.00643943	ENSCAFG00000023746	intron_variant
34	BICF2P240887	24135600	A	G	0.435879	2.19111	0.0064401	FGF12-MB21D2	intergenic_region
6	BICF2S2356387	45565916	C	A	0.231988	2.19102	0.00644133	5S_rRNA-ENSCAFG00000028653	intergenic_region
33	BICF2S23448293	24337179	A	C	0.419308	2.19063	0.0064472	STXBP5L	intron_variant
18	BICF2P1089908	24601562	A	C	0.287464	2.19039	0.0064507	ENSCAFG00000031180	intron_variant
22	BICF2P751726	16337468	C	A	0.286744	2.18947	0.00646439	DIAPH3-ENSCAFG00000023746	intergenic_region
35	BICF2G630775467	20851141	A	C	0.321376	2.18947	0.00646439	PRL-5S_rRNA	intergenic_region
4	BICF2G630169242	76295434	A	G	0.0731884	2.18944	0.00646487	ENSCAFG00000018956-U6	intergenic_region
24	TIGRP2P312094_rs8898534	19359678	A	G	0.270173	2.18934	0.0064664	U6	upstream_gene_variant
16	BICF2G630113752	34765565	C	A	0.503602	2.18921	0.00646823	ENSCAFG00000006566-ENSCAFG00000006574	intergenic_region
30	BICF2G630397694	38682133	C	A	0.465418	2.18779	0.00648941	ODF3L1-LINGO1	intergenic_region
5	BICF2S23136398	20488146	C	A	0.298271	2.18601	0.00651606	NCAM1-U4	intergenic_region
13	BICF2S2374162	58627957	A	G	0.0936599	2.18598	0.00651656	TMPRSS11F-TMPRSS11B	intergenic_region
25	BICF2P333555	42440825	A	T	0.402738	2.18558	0.00652252	SP110	intron_variant
21	BICF2P267640	11557751	A	G	0.334294	2.18511	0.00652968	GRM5-ENSCAFG00000004384	intergenic_region
37	BICF2P1101412	20096814	A	C	0.309078	2.18453	0.00653839	ERBB4-IKZF2	intergenic_region
7	BICF2S22910955	77719357	A	G	0.438865	2.18404	0.00654577	CIDEA-TUBB6	intergenic_region
3	BICF2P462755	92618508	A	G	0.402738	2.18253	0.00656858	0	0
20	BICF2P550967	54362981	A	G	0.221902	2.18051	0.00659924	SAFB	intron_variant
21	BICF2P961274	11020874	C	A	0.460375	2.17902	0.00662191	GRM5	intron_variant
18	BICF2S23355688	34183810	A	C	0.394813	2.17822	0.00663412	KIAA1549L	intron_variant
34	BICF2P1438800	4124182	A	G	0.0814121	2.17718	0.00664992	FAM173B-7SK	intergenic_region
34	BICF2P1441305	4131355	A	G	0.0814121	2.17718	0.00664992	FAM173B-7SK	intergenic_region
34	BICF2G630461658	22506485	A	G	0.367435	2.17696	0.00665336	TMEM207-IL1RAP	intergenic_region
33	BICF2P1117810	12380027	A	G	0.163295	2.17644	0.00666137	CBLB-ENSCAFG00000027807	intergenic_region
6	BICF2P272179	28919275	A	G	0.469741	2.17614	0.00666592	MKL2	intron_variant
6	BICF2P545493	28923498	G	A	0.469741	2.17614	0.00666592	MKL2	intron_variant
6	BICF2P545494	28923516	A	G	0.469741	2.17614	0.00666592	MKL2	intron_variant
6	BICF2P288170	28927711	A	G	0.469741	2.17614	0.00666592	MKL2	intron_variant
16	BICF2P419232	39825583	A	G	0.180836	2.17547	0.00667614	U6-ENSCAFG00000031006	intergenic_region
6	TIGRP2P77808_rs8624745	11984193	A	G	0.502161	2.17541	0.00667716	ENSCAFG00000015816	intron_variant
7	BICF2P262369	48441148	C	A	0.347262	2.17444	0.00669207	U6-ENSCAFG00000005666	intergenic_region
24	BICF2S23645926	37994765	G	A	0.373919	2.17438	0.00669296	ENSCAFG00000011738-ENSCAFG00000029556	intergenic_region
20	BICF2G630233156	23820780	G	A	0.176856	2.17362	0.00670472	ENSCAFG00000006583-SUCLG2	intergenic_region
38	BICF2G63065650	26708357	G	A	0.334055	2.17253	0.00672153	0	0
4	BICF2P1018431	72004044	A	G	0.0881924	2.17187	0.00673182	GLAST	intron_variant
18	TIGRP2P253389_rs8976010	46131406	G	A	0.422799	2.17175	0.00673357	TNNT3	upstream_gene_variant
17	BICF2P1334806	66945762	G	A	0.152017	2.17141	0.00673884	0	0
18	BICF2P573088	25324934	T	A	0.182997	2.17141	0.00673885	SEPT14-SCGB1C1	intergenic_region
13	BICF2P852106	4218309	A	C	0.0952381	2.17113	0.00674325	KLF10	synonymous_variant
2	BICF2G630677088	10603100	A	G	0.183718	2.16951	0.00676854	ENSCAFG00000004186	intron_variant
19	BICF2S23622875	20541665	A	C	0.461095	2.16924	0.00677272	AMER3-U6	intergenic_region
9	BICF2G630835711	37020059	A	T	0.426513	2.16913	0.00677437	ACACA	intron_variant
9	BICF2G630835732	37035203	A	G	0.426513	2.16913	0.00677437	ACACA	intron_variant
4	BICF2G63057670	7844211	G	A	0.29755	2.16862	0.00678242	DISC1-ENSCAFG00000030982	intergenic_region
2	BICF2S23644479	74382174	G	A	0.209235	2.16815	0.00678975	LDLRAP1-TMEM57	intergenic_region
22	BICF2G630321068	20431909	G	A	0.178674	2.16786	0.00679424	ENSCAFG00000027940-U6	intergenic_region
15	BICF2G630435150	29521660	G	A	0.127522	2.16701	0.00680761	TMTC3-KITLG	intergenic_region
24	BICF2G630508326	16162566	A	C	0.372478	2.16679	0.00681094	GPCPD1	intron_variant
12	TIGRP2P159803_rs9007797	22418034	A	C	0.116162	2.16552	0.00683098	FAM83B-U6	intergenic_region
8	BICF2S23327832	45347966	A	G	0.092219	2.16339	0.00686458	SIPA1L1-RGS6	intergenic_region
5	BICF2P901531	13801889	G	A	0.111111	2.16285	0.00687299	OAF-TRIM29	intergenic_region
14	BICF2G630523253	17062620	A	G	0.480519	2.16248	0.00687889	FZD1-MTERF	intergenic_region
17	TIGRP2P233237_rs9002685	48938665	A	G	0.329251	2.16194	0.0068874	BOLA3	upstream_gene_variant
11	BICF2P862026	58254418	A	G	0.146974	2.16171	0.00689116	RNF20	intron_variant
30	BICF2P431530	31447878	G	A	0.0987032	2.16031	0.00691338	IQCH	intron_variant
29	BICF2S23231264	25776594	A	G	0.46902	2.15972	0.00692272	U6-ENSCAFG00000003489	intergenic_region
2	BICF2S23542440	56833656	A	G	0.2817	2.15916	0.00693169	ARHGEF28-ENC1	intergenic_region
13	BICF2P1014054	42353912	A	G	0.26513	2.15848	0.00694252	GABRG1-GABRA2	intergenic_region
20	BICF2G630233104	23666600	A	G	0.246398	2.15789	0.00695199	ENSCAFG00000006583-SUCLG2	intergenic_region
12	TIGRP2P159752_rs8538234	22276674	C	A	0.278098	2.15684	0.00696884	FAM83B	intron_variant
23	BICF2G630391772	9395717	G	A	0.185159	2.15678	0.0069698	MYRIP	intron_variant
4	BICF2S23619899	70775755	C	A	0.206772	2.15577	0.00698607	U6-GDNF	intergenic_region
16	BICF2P726769	41845896	A	G	0.128242	2.15564	0.00698815	ENSCAFG00000028470-ENSCAFG00000028501	intergenic_region
14	BICF2P479412	21845026	G	A	0.337176	2.1552	0.00699514	ENSCAFG00000002184-Evf1_1	intergenic_region
17	BICF2P115162	33902568	C	A	0.121212	2.15487	0.00700059	EML4	intron_variant
5	BICF2S23212122	32486180	C	A	0.426407	2.15359	0.0070212	SENP3	upstream_gene_variant
21	BICF2G630657124	12261978	A	T	0.31196	2.15355	0.00702181	U6-TMEM135	intergenic_region
11	BICF2P1101477	36353483	G	A	0.481962	2.15325	0.00702667	ENSCAFG00000032301-BNC2	intergenic_region
3	BICF2G630361729	93988514	T	A	0.139769	2.15286	0.00703306	0	0
17	BICF2G630215525	27111794	C	A	0.0727666	2.1526	0.00703717	FAM98A-ENSCAFG00000005880	intergenic_region
25	BICF2P932252	33680740	A	C	0.257225	2.15196	0.00704755	U6-NKX2-6	intergenic_region
7	BICF2S2329066	8856066	A	G	0.403458	2.15132	0.00705797	SERTAD4	upstream_gene_variant
15	BICF2P512996	20963421	C	A	0.157061	2.1513	0.00705828	NAV3-ENSCAFG00000005762	intergenic_region
17	BICF2G630206000	47784758	C	A	0.439481	2.15032	0.00707431	MRPL19-EVA1A	intergenic_region
16	BICF2P1091785	47711746	A	G	0.180115	2.1498	0.00708279	TENM3	intron_variant
23	BICF2G630364122	52607541	A	C	0.180115	2.14952	0.00708722	0	0
24	BICF2P628432	3451645	A	G	0.409222	2.14835	0.00710647	RIN2	intron_variant
12	BICF2P869737	26475390	G	A	0.369597	2.14811	0.00711035	ENSCAFG00000006053-LGSN	intergenic_region
3	BICF2S23761662	29149439	G	A	0.0799712	2.14777	0.00711584	WDR41	intron_variant
26	BICF2G630797463	24426257	A	G	0.433718	2.14618	0.00714197	SFI1	intron_variant
1	BICF2P1224350	68376222	A	C	0.04683	2.14618	0.00714205	ARHGAP18-L3MBTL3	intergenic_region
34	BICF2G630455144	33034358	A	G	0.0864553	2.14575	0.00714905	GOLIM4-ENSCAFG00000014605	intergenic_region
35	BICF2S23411269	19609894	A	G	0.149135	2.14535	0.00715568	CDKAL1	intron_variant
4	TIGRP2P67500_rs8618100	87226646	C	A	0.0735931	2.14513	0.00715924	MARCH11	intron_variant
28	BICF2P183309	28784949	A	G	0.0533141	2.14412	0.00717589	FAM204A-PRLHR	intergenic_region
6	BICF2P439682	29459077	A	G	0.178211	2.14344	0.00718719	ENSCAFG00000031194-ENSCAFG00000029951	intergenic_region
18	BICF2S2328870	22874440	A	G	0.134006	2.1433	0.00718944	PCLO-SEMA3E	intergenic_region
2	BICF2P1198158	74413818	A	G	0.192363	2.14318	0.00719156	TMEM57	intron_variant
25	BICF2P283247	42550271	G	A	0.458934	2.14312	0.00719243	SP140-ENSCAFG00000010717	intergenic_region
12	BICF2P560555	17855857	C	A	0.103026	2.14221	0.00720757	CBD111-7SK	intergenic_region
8	BICF2S23913443	44275476	A	G	0.139049	2.1414	0.00722111	ADAM20-MED6	intergenic_region
21	BICF2G630657617	11532394	G	A	0.112392	2.1413	0.00722266	GRM5-ENSCAFG00000004384	intergenic_region
4	BICF2P594596	32661632	A	G	0.0930736	2.14023	0.00724049	CCSER2	intron_variant
30	BICF2S23351797	24941980	A	G	0.29683	2.13922	0.00725732	FOXB1-ANXA2	intergenic_region
23	BICF2G630363119	53605497	A	G	0.380403	2.13841	0.00727092	0	0
17	BICF2G630218695	15998903	G	A	0.315562	2.13832	0.00727244	TDRD15	intron_variant
10	BICF2S23232095	70347403	G	A	0.362392	2.13773	0.00728236	0	0
16	BICF2G630115238	37594687	A	G	0.146974	2.13764	0.00728389	SGCZ	intron_variant
39	BICF2P637189	4582559	A	C	0.185879	2.13736	0.00728851	0	0
7	BICF2P701615	32765899	G	A	0.0865801	2.13724	0.0072905	RGS7-FH	intergenic_region
10	BICF2G630667553	15257061	A	G	0.169308	2.13683	0.00729739	7SK-ATXN7L3B	intergenic_region
29	TIGRP2P366361_rs9127921	21801533	A	G	0.190922	2.13666	0.0073003	ENSCAFG00000008012-U6	intergenic_region
3	TIGRP2P50626_rs8682637	71272924	G	A	0.0711176	2.13557	0.00731864	JAKMIP1	intron_variant
18	BICF2P415900	26121674	A	C	0.386167	2.13537	0.00732195	HSD17B12-cfa-mir-129-2	intergenic_region
28	BICF2P964985	11350718	G	A	0.289625	2.13465	0.00733417	KCNQ1DN-R3HCC1L	intergenic_region
16	BICF2G630846862	17508979	G	A	0.334294	2.13455	0.00733578	ENSCAFG00000005001-DPP6	intergenic_region
16	BICF2G630846875	17517692	A	G	0.334294	2.13455	0.00733578	ENSCAFG00000005001-DPP6	intergenic_region
31	BICF2G630737882	27348165	A	G	0.199568	2.13305	0.00736127	SYNJ1	intron_variant
6	BICF2S23112733	28902499	A	G	0.46902	2.13236	0.00737291	cfa-mir-193b-MKL2	intergenic_region
23	BICF2P275539	30840515	C	G	0.272334	2.13118	0.00739306	SLCO2A1	intron_variant
24	BICF2G630506039	18820076	A	G	0.471182	2.13066	0.00740186	TGM3-STK35	intergenic_region
3	BICF2G630705409	32342708	A	G	0.426513	2.12984	0.00741589	TUBGCP5	upstream_gene_variant
25	BICF2G630157937	52285112	G	A	0.444524	2.12974	0.00741753	0	0
3	BICF2P228434	89218315	G	A	0.240634	2.12973	0.00741776	SLIT2	intron_variant
12	BICF2P703899	22259226	A	C	0.302594	2.12751	0.00745571	FAM83B	intron_variant
23	BICF2S23619360	45296344	A	G	0.397547	2.12745	0.00745677	FAM194A	intron_variant
6	BICF2S23029673	11690964	G	A	0.201729	2.12725	0.00746018	FAM220A	downstream_gene_variant
28	BICF2G630276489	11228621	G	A	0.309942	2.12691	0.00746606	CRTAC1	upstream_gene_variant
14	BICF2P311030	44502729	G	A	0.476225	2.12682	0.00746758	PDE1C	intron_variant
6	BICF2P637916	28933513	C	G	0.485591	2.12677	0.00746846	MKL2	intron_variant
2	BICF2P292015	57202637	A	G	0.347262	2.12552	0.00748989	ENC1-HEXB	intergenic_region
1	BICF2G630719841	37934337	C	G	0.362392	2.1252	0.00749555	ADGB-ENSCAFG00000029107	intergenic_region
1	BICF2P591798	87539640	A	G	0.0663781	2.12519	0.00749568	ENSCAFG00000028932-C9orf135	intergenic_region
5	G337f67S283	32457828	A	G	0.425793	2.12513	0.00749673	POLR2A-TNFSF12	intergenic_region
5	BICF2S23049729	32498150	T	A	0.425793	2.12513	0.00749673	SNORD10	upstream_gene_variant
3	BICF2P968952	50447243	A	G	0.2817	2.12476	0.00750308	AGBL1-7SK	intergenic_region
6	BICF2S23028659	15522236	C	G	0.0497835	2.12389	0.00751821	MICALL2-UNCX	intergenic_region
32	BICF2P454846	10830385	A	G	0.160663	2.12349	0.00752506	SPARCL1	downstream_gene_variant
33	BICF2P1258516	16933149	G	A	0.414265	2.12299	0.00753366	CD200-ENSCAFG00000010477	intergenic_region
9	BICF2P974723	52004352	A	G	0.113112	2.12252	0.00754191	NTNG2	intron_variant
11	BICF2G630297820	27140083	G	A	0.334776	2.12146	0.00756024	ENSCAFG00000031402-IL33	intergenic_region
8	BICF2P448232	49106564	A	G	0.120464	2.12074	0.00757286	GPATCH2L	intron_variant
21	BICF2P1115878	18436209	C	A	0.216138	2.1206	0.00757532	ENSCAFG00000004649-ENSCAFG00000030498	intergenic_region
25	BICF2G63097161	31767138	G	A	0.0959302	2.12058	0.00757573	ENSCAFG00000007079	downstream_gene_variant
15	BICF2P108162	21009719	A	G	0.190922	2.12014	0.00758334	NAV3-ENSCAFG00000005762	intergenic_region
21	BICF2G630650670	21623005	A	G	0.347983	2.11998	0.00758617	CAPN5	downstream_gene_variant
4	BICF2P1286547	54662170	C	A	0.0972622	2.11955	0.00759356	SGCD-ENSCAFG00000030235	intergenic_region
24	BICF2G630509899	14191665	A	G	0.487752	2.11934	0.00759735	TMX4-HAO1	intergenic_region
4	BICF2P314918	37828274	A	G	0.189481	2.11928	0.00759829	DRD1-MSX2	intergenic_region
8	BICF2P933821	56335370	A	G	0.104618	2.11861	0.00761017	U6-ENSCAFG00000017323	intergenic_region
7	BICF2P1064539	77752276	A	G	0.424242	2.11821	0.00761703	AFG3L2	intron_variant
9	BICF2P57249	48056026	G	A	0.183718	2.11719	0.00763502	EHMT1	intron_variant
4	BICF2P1471441	17885586	A	G	0.31241	2.11699	0.00763862	CTNNA3	intron_variant
4	BICF2P926170	17872562	A	G	0.290765	2.11662	0.00764499	CTNNA3	intron_variant
29	BICF2G630631806	35300849	C	A	0.134921	2.11655	0.0076462	RIPK2	intron_variant
6	BICF2P354986	11632379	C	A	0.469985	2.11634	0.00765003	CYTH3-FAM220A	intergenic_region
5	BICF2P533881	63037190	A	G	0.152017	2.11532	0.00766801	CLSTN1-CTNNBIP1	intergenic_region
32	BICF2G630591034	24519598	C	A	0.396974	2.11491	0.00767513	CENPE	intron_variant
16	BICF2S23743305	13460785	A	G	0.157353	2.11469	0.00767901	BPGM-ENSCAFG00000003164	intergenic_region
3	BICF2S23019370	62422987	G	A	0.250361	2.1141	0.00768948	FAM53A	upstream_gene_variant
14	BICF2P809457	39751182	A	G	0.152738	2.1136	0.00769833	SNX10-SKAP2	intergenic_region
8	BICF2P292946	37987082	G	A	0.221182	2.11104	0.00774387	PPP2R5E	intron_variant
33	BICF2S23032	17629710	A	G	0.152017	2.11053	0.00775301	BOC	downstream_gene_variant
30	BICF2G630409636	17642603	G	A	0.333333	2.11014	0.00775998	LEO1	missense_variant
28	BICF2S23431929	38490901	A	G	0.251124	2.10996	0.00776317	EBF3	3_prime_UTR_variant
26	BICF2G630798015	23815287	A	G	0.324207	2.1099	0.00776429	OSBP2	intron_variant
15	TIGRP2P202351_rs9041104	48111659	G	A	0.12464	2.10956	0.00777033	ENSCAFG00000007865-DCLK2	intergenic_region
7	BICF2P1007464	38727129	A	G	0.473343	2.10864	0.00778689	ACBD3	intron_variant
31	BICF2G630732623	14536638	A	G	0.0972622	2.1081	0.00779642	ENSCAFG00000008309-CHODL	intergenic_region
14	BICF2S23715556	49085738	A	G	0.456052	2.10792	0.00779975	DNAJB9-SNORD116	intergenic_region
4	BICF2G630166744	38258702	A	G	0.479827	2.10792	0.00779977	MSX2-ENSCAFG00000030421	intergenic_region
26	BICF2G630797994	23828402	A	G	0.148415	2.10544	0.00784443	OSBP2	intron_variant
10	BICF2P622311	32598504	G	A	0.48415	2.10495	0.00785328	NUAK1-U6	intergenic_region
7	BICF2P277135	28402269	A	G	0.101585	2.10401	0.00787026	ENSCAFG00000015015-METTL11B	intergenic_region
8	BICF2P1102916	12817535	A	G	0.494957	2.10277	0.00789273	NPAS3-EGLN3	intergenic_region
11	BICF2P1245581	41459716	A	G	0.347543	2.10167	0.00791274	CDKN2B-AS-DMRTA1	intergenic_region
21	BICF2P943822	43369969	A	G	0.239914	2.10141	0.00791747	NELL1	intron_variant
32	BICF2P1434267	10662145	G	A	0.433622	2.10038	0.00793626	KLHL8	missense_variant
30	TIGRP2P372881_rs8585158	37322749	A	G	0.329957	2.10011	0.0079412	ISLR	upstream_gene_variant
28	BICF2P423576	33052536	A	G	0.157781	2.09986	0.00794582	BUB3-GPR26	intergenic_region
2	TIGRP2P20442_rs9011711	14878483	A	G	0.15873	2.09931	0.00795594	KIF5B	3_prime_UTR_variant
14	BICF2G630525467	32365674	A	T	0.274496	2.09909	0.00795988	SNX13-U6atac	intergenic_region
16	BICF2G630846845	17494478	A	G	0.258646	2.09854	0.00796998	ENSCAFG00000005001-DPP6	intergenic_region
16	BICF2S23220747	14335577	A	G	0.260807	2.09848	0.00797108	U6-7SK	intergenic_region
20	BICF2S23748153	44331745	A	G	0.144092	2.09755	0.00798831	ENSCAFG00000014647	synonymous_variant
1	BICF2S23319232	54119750	C	A	0.490634	2.09728	0.00799323	ENSCAFG00000023764-T	intergenic_region
4	BICF2P316701	63103531	A	G	0.446686	2.09652	0.00800722	U2-U6	intergenic_region
5	BICF2P253481	75769665	A	G	0.0627706	2.09611	0.00801467	WDR59	intron_variant
3	BICF2G630361960	94410234	G	A	0.216138	2.09604	0.00801606	0	0
17	BICF2S2328557	13809098	G	A	0.473343	2.09586	0.00801935	KCNS3-SNORD52	intergenic_region
13	BICF2G630746274	64564216	A	G	0.370851	2.09565	0.00802324	0	0
6	TIGRP2P81425_rs9204625	35596059	G	A	0.185879	2.0952	0.00803161	RBFOX1-ENSCAFG00000019087	intergenic_region
5	BICF2P209036	9014826	G	A	0.41342	2.09381	0.00805723	FEZ1	intron_variant
27	BICF2P835642	33832115	G	A	0.463977	2.09377	0.0080581	DUSP16	3_prime_UTR_variant
1	BICF2P740566	52419923	A	G	0.438761	2.09331	0.0080666	QKI-HNRNPDL	intergenic_region
16	BICF2P1031521	13973653	C	A	0.056196	2.09288	0.00807452	ENSCAFG00000032319	intron_variant
1	BICF2S23149839	104171523	A	G	0.233429	2.0928	0.00807616	ENSCAFG00000032488-ENSCAFG00000028581	intergenic_region
21	BICF2G630658718	8074186	A	G	0.301153	2.09241	0.00808335	FAT3	intron_variant
31	BICF2P858570	27186063	G	A	0.103026	2.09235	0.00808437	EVA1C	intron_variant
5	BICF2P1260756	9003478	G	A	0.417147	2.09228	0.00808568	FEZ1	intron_variant
5	BICF2P1260757	9003790	G	A	0.417147	2.09228	0.00808568	FEZ1	intron_variant
11	BICF2S23336218	46838606	G	A	0.373199	2.09065	0.00811608	ENSCAFG00000026571	upstream_gene_variant
30	BICF2G630408692	19849097	G	A	0.493516	2.09064	0.00811625	UNC13C	intron_variant
29	BICF2S23147144	19080793	G	A	0.270173	2.08977	0.00813264	SLCO5A1-VTI1B	intergenic_region
1	BICF2P818099	39021948	A	G	0.490634	2.08963	0.00813532	7SK-U6	intergenic_region
33	BICF2S23452594	14864586	A	G	0.107349	2.08944	0.00813883	ENSCAFG00000010335-PVRL3	intergenic_region
14	BICF2S23331706	22352515	A	C	0.245677	2.08906	0.00814599	ENSCAFG00000031467-TAC1	intergenic_region
32	BICF2G630590039	25371099	G	A	0.347983	2.08873	0.00815203	U6-CXXC4	intergenic_region
18	BICF2S23541745	50752014	A	G	0.291787	2.08849	0.00815662	CCS	intron_variant
16	BICF2P356666	41998567	A	G	0.458213	2.08762	0.00817299	ENSCAFG00000028470-ENSCAFG00000028501	intergenic_region
16	BICF2P742018	42015699	G	A	0.458213	2.08762	0.00817299	ENSCAFG00000028470-ENSCAFG00000028501	intergenic_region
3	TIGRP2P55842_rs8846762	91037189	A	G	0.262968	2.08603	0.00820299	ENSCAFG00000016664-ANAPC13	intergenic_region
8	TIGRP2P108864_rs8687421	21495885	A	G	0.0583573	2.0858	0.00820725	LRFN5-U6	intergenic_region
26	BICF2S23548237	37095815	A	G	0.240634	2.08553	0.00821236	A1CF	intron_variant
23	BICF2G630373038	37002314	G	A	0.151012	2.08492	0.00822392	SPSB4	intron_variant
3	BICF2G630340922	45852748	G	A	0.32853	2.08426	0.00823646	MCTP2	intron_variant
22	BICF2S22948628	16313035	G	C	0.373016	2.08405	0.00824042	DIAPH3-ENSCAFG00000023746	intergenic_region
33	BICF2S23448789	12410046	A	G	0.257205	2.08346	0.00825161	CBLB-ENSCAFG00000027807	intergenic_region
25	TIGRP2P324957_rs8555158	15127163	G	A	0.283862	2.08331	0.00825441	TNFRSF19-SACS	intergenic_region
6	TIGRP2P85748_rs8641594	9074446	A	G	0.160663	2.08327	0.0082553	TFR2	intron_variant
3	BICF2G630338265	40364793	G	A	0.157061	2.08326	0.0082555	ASB7	downstream_gene_variant
3	TIGRP2P42176_rs9091206	40370979	A	G	0.157061	2.08326	0.0082555	ASB7	intron_variant
35	BICF2P906653	20140208	A	G	0.369597	2.08295	0.00826124	SOX4-PRL	intergenic_region
1	BICF2P1064029	122763071	A	G	0.407061	2.08281	0.00826405	0	0
16	BICF2P1407329	30236817	A	G	0.461039	2.08236	0.00827264	U6-DUSP26	intergenic_region
5	BICF2S23445477	8761953	G	A	0.405564	2.08229	0.00827389	ENSCAFG00000023639-NEAT1_1	intergenic_region
13	BICF2S22953483	10562921	G	A	0.471182	2.08058	0.00830656	KCNV1-U6	intergenic_region
15	BICF2P1123161	27698460	T	A	0.242795	2.07921	0.00833273	MGAT4C-ENSCAFG00000031591	intergenic_region
22	BICF2G63090510	61518783	A	C	0.219741	2.07895	0.0083377	0	0
4	BICF2P1271760	4775771	G	A	0.121934	2.07802	0.00835569	RBM34	intron_variant
27	BICF2G630140001	7800706	A	G	0.434438	2.07726	0.00837026	SLC38A4-SLC38A2	intergenic_region
18	G1003f33S61	6976604	G	A	0.0806916	2.07684	0.00837835	HECW1	intron_variant
11	BICF2S23530197	73117674	G	A	0.128963	2.07653	0.00838431	ENSCAFG00000003544-CDK5RAP2	intergenic_region
17	BICF2S23755075	56485980	A	G	0.165706	2.07614	0.00839181	WARS2-HAO2	intergenic_region
2	BICF2S22958131	25096035	C	A	0.193084	2.07597	0.00839515	CELF2	intron_variant
4	BICF2P317031	73314815	A	C	0.0583573	2.0751	0.00841202	AGXT2	intron_variant
13	BICF2P448775	61574487	G	A	0.160663	2.0749	0.00841596	ENSCAFG00000002956-ENSCAFG00000002959	intergenic_region
12	BICF2P1190796	24143513	A	G	0.172911	2.07442	0.00842514	DST	intron_variant
20	BICF2P1297167	37232759	G	A	0.163781	2.07325	0.00844802	PBRM1	downstream_gene_variant
15	BICF2G630444054	11765324	G	A	0.104985	2.07322	0.00844851	ELAVL4-BEND5	intergenic_region
27	BICF2S22927985	4170470	A	G	0.480491	2.07286	0.00845551	DIP2B	intron_variant
4	BICF2P342478	80006078	A	C	0.242424	2.07219	0.00846849	ENSCAFG00000018980-7SK	intergenic_region
32	BICF2G630591921	23510329	A	C	0.0997046	2.07182	0.00847586	BANK1	intron_variant
3	BICF2P518314	82275318	G	A	0.402017	2.07168	0.00847861	ENSCAFG00000029510-5S_rRNA	intergenic_region
33	TIGRP2P386389_rs8712252	14692835	A	G	0.451009	2.07147	0.00848271	ENSCAFG00000010335-PVRL3	intergenic_region
7	TIGRP2P93453_rs8676065	25773622	G	A	0.394092	2.06873	0.00853636	PRDX6-TNFSF4	intergenic_region
31	BICF2P145206	17299401	A	G	0.208213	2.068	0.0085506	NCAM2	intron_variant
6	BICF2G630572926	68320274	A	G	0.290346	2.06796	0.00855147	U6-IFI44	intergenic_region
11	BICF2P386071	55497603	C	A	0.45317	2.06778	0.00855506	GABBR2	intron_variant
8	BICF2S23438122	9772943	G	A	0.371758	2.06761	0.0085583	PRKD1-ENSCAFG00000012573	intergenic_region
29	BICF2S23523987	23450792	A	G	0.0691643	2.0666	0.00857832	CRISPLD1-U6	intergenic_region
14	BICF2G630526375	35094956	C	G	0.110951	2.06565	0.00859705	ABCB5-U6	intergenic_region
4	BICF2G630169890	77303192	G	A	0.163545	2.06505	0.00860885	ENSCAFG00000018956-U6	intergenic_region
31	BICF2P282929	38673472	G	A	0.139769	2.06483	0.00861339	FAM207A-ADARB1	intergenic_region
33	BICF2G63080793	20922978	G	A	0.0554755	2.06461	0.00861759	BC040587-ENSCAFG00000001369	intergenic_region
9	BICF2G630473027	55841605	A	C	0.272727	2.06448	0.00862033	FAM129B	intron_variant
33	TIGRP2P385894_rs9112226	12755495	A	G	0.0814121	2.0638	0.00863384	CCDC54-BBX	intergenic_region
6	BICF2S23157686	71513929	A	G	0.39049	2.0636	0.00863764	LHX8-TYW3	intergenic_region
8	BICF2P1420129	27241610	A	G	0.308357	2.06298	0.00865004	PYGL	intron_variant
17	BICF2G630210682	35391234	A	G	0.258646	2.06295	0.00865072	ACOXL	intron_variant
2	BICF2P9436	47679731	A	G	0.0756484	2.06279	0.00865379	NDUFAF2	intron_variant
4	BICF2P984761	41273784	A	G	0.198127	2.06266	0.00865654	KCNIP1	intron_variant
23	BICF2P195051	55103040	A	G	0.23415	2.06193	0.00867103	0	0
1	BICF2P373354	24749705	C	A	0.114553	2.06119	0.00868589	LDLRAD4	intron_variant
18	BICF2S23623282	11457993	G	A	0.0540346	2.06095	0.00869052	ENSCAFG00000025443-ENSCAFG00000031742	intergenic_region
35	BICF2G630773102	12330486	A	G	0.332133	2.06043	0.00870105	EDN1-ENSCAFG00000009809	intergenic_region
17	BICF2S23125149	20505739	C	A	0.367435	2.06015	0.0087066	DRC1	intron_variant
3	BICF2P1331666	64978020	A	G	0.402738	2.05991	0.00871142	C1QTNF7-CPEB2	intergenic_region
3	TIGRP2P51126_rs8638818	73025435	G	A	0.389049	2.05976	0.0087144	KLB	intron_variant
3	BICF2G630706335	33592851	A	C	0.326369	2.05976	0.00871442	ENSCAFG00000009974-GABRA5	intergenic_region
2	BICF2P1097685	84153457	G	A	0.414265	2.05952	0.00871918	TNFRSF1B	upstream_gene_variant
33	BICF2P1440568	13224670	G	A	0.137155	2.05939	0.00872191	BBX-CD47	intergenic_region
15	BICF2P548924	21618202	G	A	0.233429	2.05929	0.00872398	ENSCAFG00000005762-SYT1	intergenic_region
3	TIGRP2P47184_rs8650949	59619158	G	A	0.221182	2.05866	0.00873655	SORCS2	intron_variant
2	BICF2P557172	13529081	G	A	0.389049	2.05833	0.0087431	U6-U6	intergenic_region
28	BICF2G630276981	7066414	A	G	0.230548	2.05794	0.00875106	HHEX	downstream_gene_variant
38	TIGRP2P425207_rs8728709	25339449	G	A	0.146254	2.05476	0.00881545	0	0
25	BICF2P601865	43076968	C	A	0.411383	2.05464	0.0088178	PSMD1	intron_variant
11	BICF2S2447356	54221408	A	G	0.262248	2.05404	0.00883008	SHB	intron_variant
33	TIGRP2P385978_rs9043558	13180915	A	C	0.484513	2.05381	0.00883463	BBX-CD47	intergenic_region
3	TIGRP2P54115_rs9123739	85008634	G	A	0.229107	2.05377	0.00883557	PI4K2B	upstream_gene_variant
35	BICF2S22937962	20126915	G	A	0.410534	2.05317	0.00884774	SOX4-PRL	intergenic_region
5	TIGRP2P75235_rs8884972	85738342	C	A	0.295389	2.05292	0.00885275	CDH11-CDH8	intergenic_region
23	TIGRP2P308737_rs8720126	52774042	C	A	0.254323	2.05244	0.00886254	0	0
10	BICF2G630486196	38686708	G	A	0.0706052	2.05239	0.00886367	POU3F3-ENSCAFG00000026741	intergenic_region
36	BICF2P497794	20899471	G	A	0.10951	2.05162	0.00887936	MTX2-TUG1_1	intergenic_region
6	BICF2G630577939	51378480	C	A	0.0943804	2.0513	0.00888588	5S_rRNA-cfa-mir-137	intergenic_region
16	BICF2P1158408	53975596	G	A	0.17219	2.05029	0.00890653	ENSCAFG00000031506	upstream_gene_variant
4	BICF2P197533	20722557	C	A	0.154899	2.04998	0.00891292	C10orf35-COL13A1	intergenic_region
22	BICF2S23414416	48587848	A	G	0.162824	2.04993	0.00891397	STK24	intron_variant
2	BICF2G630673634	17481690	G	A	0.31196	2.04884	0.00893636	BAMBI-ENSCAFG00000003936	intergenic_region
18	BICF2P1353640	26354621	A	C	0.136888	2.04768	0.00896033	API5	intron_variant
20	TIGRP2P270428_rs9131267	14964086	A	G	0.351585	2.04749	0.00896425	CNTN4-CNTN6	intergenic_region
27	BICF2G630139392	7024795	A	G	0.0590778	2.04661	0.00898238	ENDOU	upstream_gene_variant
18	TIGRP2P239993_rs8560834	17756537	G	A	0.458874	2.04645	0.00898569	U6	downstream_gene_variant
12	TIGRP2P160417_rs8853730	24609358	A	C	0.386888	2.0445	0.00902602	PRIM2	intron_variant
1	BICF2S23715288	70431583	G	A	0.0569164	2.04442	0.0090277	ENSCAFG00000001208-ZNF367	intergenic_region
1	BICF2P1291244	70469451	A	C	0.0569164	2.04442	0.0090277	ZNF367	intron_variant
6	BICF2P241179	70542485	G	A	0.227666	2.0436	0.00904483	ST6GALNAC3-ASB17	intergenic_region
12	BICF2P1083771	42669691	C	A	0.291787	2.04351	0.00904662	IBTK	3_prime_UTR_variant
10	BICF2S2309846	62708929	C	A	0.270173	2.04334	0.00905027	EHBP1	intron_variant
35	BICF2P417385	27532089	T	A	0.337176	2.04332	0.00905059	0	0
20	BICF2P1446666	37175570	G	C	0.162338	2.04329	0.0090513	PBRM1	intron_variant
8	BICF2S22936112	54788362	C	A	0.466089	2.04277	0.00906218	5S_rRNA-5S_rRNA	intergenic_region
4	BICF2P1469250	19941806	A	G	0.117435	2.04257	0.00906626	CCAR1	intron_variant
6	BICF2P182583	14448060	C	A	0.293948	2.04227	0.00907261	GNA12	intron_variant
6	BICF2P915764	21737492	A	C	0.288184	2.04203	0.0090775	CACNG3-PRKCB	intergenic_region
7	BICF2G630465252	4349453	A	G	0.232709	2.04177	0.009083	PTPRC-ATP6V1G3	intergenic_region
18	BICF2P631156	8333065	A	G	0.450288	2.04146	0.00908946	INHBA-ENSCAFG00000026807	intergenic_region
32	BICF2P431330	33302398	A	G	0.329251	2.04086	0.00910208	CAMK2D	intron_variant
21	TIGRP2P286513_rs8639565	45797464	G	A	0.117647	2.03991	0.00912209	UBE2D3-LUZP2	intergenic_region
34	BICF2P1217379	39460071	A	G	0.0951009	2.03933	0.00913425	NAALADL2	intron_variant
14	BICF2S2345879	45484345	G	A	0.264409	2.0386	0.00914949	BBS9	intron_variant
19	BICF2P924850	54257712	G	A	0.355908	2.03734	0.00917621	0	0
24	BICF2G630496337	45908995	A	G	0.270893	2.03699	0.00918345	ENSCAFG00000012668	intron_variant
38	BICF2P1250006	10833704	G	A	0.303314	2.03684	0.00918677	ENSCAFG00000029859-KCTD3	intergenic_region
29	BICF2G630633896	38411036	A	C	0.146974	2.03672	0.00918924	RUNX1T1-U6	intergenic_region
18	BICF2G630696670	40975057	A	G	0.231268	2.03599	0.0092048	ENSCAFG00000029885-OR4C15	intergenic_region
24	BICF2P809314	45921984	A	G	0.213977	2.03516	0.00922221	ENSCAFG00000012668	intron_variant
19	BICF2S23722686	38502295	G	A	0.0555556	2.03496	0.00922658	R3HDM1	downstream_gene_variant
32	BICF2S23424494	33465329	A	G	0.15368	2.0349	0.00922774	CAMK2D	intron_variant
13	BICF2P458350	42284475	A	G	0.45389	2.03486	0.00922863	GABRG1-GABRA2	intergenic_region
24	BICF2S2357174	9463004	A	G	0.314841	2.03451	0.00923618	SPTLC3	intron_variant
19	BICF2S23211263	47376628	A	C	0.12536	2.03335	0.00926077	VIS1-U6	intergenic_region
11	BICF2P434950	10720693	C	A	0.211095	2.03271	0.00927454	U6-ARL6IP1	intergenic_region
19	BICF2G63038402	17378819	G	A	0.139769	2.03225	0.00928422	ENSCAFG00000003994	intron_variant
6	BICF2P884054	45100137	C	A	0.0628613	2.03224	0.00928462	PRMT6-5S_rRNA	intergenic_region
37	BICF2P846455	26769365	A	G	0.0907781	2.03218	0.00928576	SLC4A3-U6	intergenic_region
32	TIGRP2P379358_rs8488983	15512879	G	A	0.342939	2.03216	0.00928627	ENSCAFG00000009965-ENSCAFG00000029672	intergenic_region
4	BICF2P1310841	85750874	G	A	0.213256	2.03187	0.00929252	CDH18-SNORA62	intergenic_region
5	BICF2S23114666	18517129	G	A	0.26513	2.03185	0.00929294	CADM1-ENSCAFG00000026790	intergenic_region
13	BICF2P603082	21267883	G	A	0.207493	2.0314	0.00930259	U6-ZHX2	intergenic_region
17	BICF2G630215508	27129035	G	A	0.0670029	2.03129	0.00930482	FAM98A-ENSCAFG00000005880	intergenic_region
25	BICF2S23524323	9483406	A	G	0.216138	2.03108	0.00930934	HMGB1	intron_variant
35	BICF2P558483	18742471	G	A	0.449568	2.03105	0.0093099	MBOAT1	intron_variant
29	BICF2S2314606	19100679	A	T	0.45389	2.03105	0.00930994	SLCO5A1-VTI1B	intergenic_region
12	BICF2P711907	38249815	A	G	0.136888	2.03085	0.00931438	ENSCAFG00000002777-U6	intergenic_region
14	BICF2G630519889	11721630	G	A	0.368156	2.03072	0.00931717	SPAM1	intron_variant
20	BICF2P540783	26418923	G	A	0.268012	2.0307	0.00931754	U4atac-ADAMTS9	intergenic_region
31	BICF2S23034278	35562466	A	C	0.153458	2.03064	0.00931874	Y_RNA-U8	intergenic_region
20	BICF2S2339957	23565097	G	A	0.332853	2.03012	0.00933	ENSCAFG00000006583-SUCLG2	intergenic_region
3	BICF2G630344656	63245413	A	G	0.349928	2.02993	0.00933405	ACTB-LDB2	intergenic_region
20	BICF2P16562	39701869	A	G	0.362915	2.02933	0.00934702	BSN-DAG1	intergenic_region
33	BICF2G630247982	11514370	A	G	0.407061	2.02896	0.00935499	CBLB-ENSCAFG00000027807	intergenic_region
20	TIGRP2P278514_rs8821753	60336245	G	A	0.461095	2.0287	0.00936052	0	0
1	BICF2G630720860	39537590	C	A	0.410663	2.02732	0.00939037	SASH1-UST	intergenic_region
16	BICF2P1395240	37580455	C	G	0.136888	2.02731	0.00939054	SGCZ	intron_variant
5	BICF2S235436	14444900	A	G	0.367452	2.02703	0.00939662	ENSCAFG00000012017-U6	intergenic_region
32	BICF2G630592854	22682974	A	C	0.319164	2.0267	0.00940362	5_8S_rRNA-PPP3CA	intergenic_region
15	BICF2G630434636	30593836	A	C	0.101585	2.02644	0.00940943	ATP2B1	intron_variant
38	BICF2S23718897	19161476	A	G	0.054755	2.02543	0.00943136	7SK-NUF2	intergenic_region
8	TIGRP2P115841_rs8992318	54954680	A	G	0.425072	2.02503	0.00944002	5S_rRNA-U6	intergenic_region
6	BICF2P953174	56107661	A	G	0.365994	2.0248	0.00944485	SNORD58-FAM69A	intergenic_region
23	BICF2P633164	20577579	A	G	0.260492	2.02471	0.00944702	ENSCAFG00000032531-U6	intergenic_region
12	BICF2S241459	12531236	A	G	0.101879	2.02417	0.00945857	MRPL14	downstream_gene_variant
1	BICF2G630715037	22510804	A	G	0.0979827	2.02417	0.00945868	DCC-ENSCAFG00000030017	intergenic_region
16	BICF2P1004011	30224487	G	A	0.460375	2.02354	0.00947238	U6-DUSP26	intergenic_region
7	BICF2P241357	25877934	A	C	0.167867	2.02344	0.00947455	PRDX6-TNFSF4	intergenic_region
33	BICF2P466299	29463543	G	A	0.420635	2.02323	0.00947916	UBXN7	intron_variant
9	BICF2G630473035	55847054	C	A	0.273055	2.02302	0.00948379	FAM129B	intron_variant
21	BICF2G630655923	13697442	A	G	0.362392	2.02298	0.00948463	SYTL2	intron_variant
6	BICF2S23130075	71519314	G	A	0.387446	2.02275	0.00948955	LHX8-TYW3	intergenic_region
1	BICF2P795193	58584136	G	A	0.370665	2.02234	0.00949867	PLN	upstream_gene_variant
1	BICF2P921315	70869349	G	A	0.227666	2.02221	0.00950148	ERCC6L2	intron_variant
32	BICF2P962676	32136314	A	G	0.242075	2.02172	0.00951216	TIFA	upstream_gene_variant
32	BICF2P962672	32136598	T	A	0.242075	2.02172	0.00951216	TIFA	upstream_gene_variant
10	BICF2S22933661	62726601	A	C	0.17147	2.02141	0.00951896	EHBP1	intron_variant
14	TIGRP2P188682_rs8702070	24220147	A	G	0.0648415	2.0213	0.00952129	NXPH1	intron_variant
21	BICF2P241898	43365240	A	G	0.247839	2.02104	0.0095271	NELL1	intron_variant
30	BICF2P602948	34694328	G	A	0.162824	2.02035	0.00954227	LRRC49	intron_variant
26	TIGRP2P344406_rs9045784	37731710	C	A	0.345821	2.01985	0.0095533	PAPSS2	intron_variant
31	BICF2G630738486	28114420	G	A	0.395533	2.01977	0.00955504	ENSCAFG00000032434	downstream_gene_variant
23	BICF2P1350811	46380108	A	G	0.138329	2.01962	0.00955825	AADAC-SUCNR1	intergenic_region
5	BICF2P1435673	12526871	A	G	0.0691643	2.01952	0.00956058	SORL1	intron_variant
18	BICF2S23750902	37460953	A	G	0.126801	2.01951	0.00956079	ENSCAFG00000031389-ENSCAFG00000015225	intergenic_region
6	BICF2G630582044	47896705	G	A	0.422688	2.0195	0.00956099	COL11A1-OLFM3	intergenic_region
8	BICF2S22921872	18360664	C	A	0.348872	2.01946	0.00956176	FBXO33-ENSCAFG00000008462	intergenic_region
20	BICF2S2336417	6290446	A	G	0.224063	2.01916	0.00956834	NUCB1	upstream_gene_variant
32	BICF2S23149334	6940786	G	A	0.414986	2.01912	0.00956926	LIN54	upstream_gene_variant
22	BICF2G63092897	63673012	A	G	0.0649351	2.01804	0.00959308	0	0
5	BICF2G630241705	70694436	G	A	0.0619597	2.01721	0.00961158	ENSCAFG00000020012	intron_variant
21	BICF2G630646340	30375145	A	G	0.471182	2.01665	0.00962387	ENSCAFG00000032022-ENSCAFG00000030046	intergenic_region
9	BICF2G630473441	57672655	G	A	0.385281	2.01637	0.00963005	MAPKAP1	intron_variant
21	BICF2P1273432	40560891	G	A	0.314121	2.01623	0.00963321	TPH1	intron_variant
2	BICF2P86672	56971757	G	A	0.409222	2.01546	0.00965018	ARHGEF28-ENC1	intergenic_region
36	BICF2G630759072	23864413	A	G	0.056196	2.01393	0.00968436	CWC22-U6	intergenic_region
20	BICF2S23726023	44246884	A	G	0.143372	2.01381	0.00968709	UPF1	intron_variant
20	BICF2S23150491	44312048	G	A	0.143372	2.01381	0.00968709	COMP	missense_variant
38	BICF2G63072810	17708630	C	G	0.18804	2.01326	0.00969934	MGST3-LRRC52	intergenic_region
26	BICF2S22941805	19558093	A	G	0.149135	2.01291	0.00970718	MYO18B	intron_variant
6	TIGRP2P81753_rs9127078	37072166	A	G	0.458213	2.01244	0.00971759	SRL	upstream_gene_variant
32	BICF2P221548	5914895	A	C	0.479827	2.01243	0.00971784	U4-ENSCAFG00000008931	intergenic_region
23	BICF2S23437169	50607303	A	G	0.367244	2.01216	0.00972382	ENSCAFG00000008882-CCNL1	intergenic_region
31	BICF2P696414	4052448	G	A	0.157061	2.01188	0.00973023	ENSCAFG00000032194-ENSCAFG00000029014	intergenic_region
28	BICF2G630265488	35467679	G	A	0.407648	2.01184	0.0097311	ADAM12	intron_variant
5	BICF2P103684	56184112	G	A	0.0907781	2.01178	0.00973246	KLHL17	upstream_gene_variant
6	BICF2P537803	37148711	G	A	0.396104	2.01128	0.00974353	SRL	upstream_gene_variant
2	BICF2G630675203	13553598	A	G	0.451729	2.01115	0.00974656	U6-U6	intergenic_region
35	BICF2P259262	29137107	A	G	0.207071	2.01101	0.00974973	0	0
7	BICF2S22957026	28159712	G	A	0.393939	2.01085	0.00975327	PRRX1-GORAB	intergenic_region
14	BICF2S2341510	46727069	A	C	0.496398	2.01052	0.00976065	DPY19L1	intron_variant
14	BICF2G630528742	41811219	A	G	0.092219	2.01037	0.00976395	CREB5	intron_variant
21	BICF2P256038	41196725	A	T	0.179654	2.00974	0.00977833	ENSCAFG00000009402	missense_variant
12	BICF2P949637	74140095	A	G	0.216138	2.00946	0.00978443	0	0
26	BICF2S23020975	25410548	A	G	0.382353	2.00898	0.00979532	ENSCAFG00000024720	intron_variant
15	BICF2P1412527	66011861	T	A	0.228592	2.00893	0.00979651	0	0
19	BICF2P20015	10122581	G	A	0.283141	2.00891	0.00979684	7SK-7SK	intergenic_region
15	BICF2P1295471	67059345	G	A	0.494949	2.00797	0.00981811	0	0
18	BICF2P1260127	24593304	G	A	0.290346	2.00697	0.00984087	ENSCAFG00000031180	intron_variant
31	BICF2S23661167	29396362	A	G	0.492795	2.00668	0.0098473	ENSCAFG00000009541-MRPS6	intergenic_region
3	BICF2G630354859	88080183	A	C	0.0706052	2.0065	0.00985143	GPR125-KCNIP4	intergenic_region
3	BICF2G630106591	36432197	G	A	0.192363	2.00598	0.00986321	MKRN3-7SK	intergenic_region
18	BICF2G630696686	40964730	G	A	0.286744	2.00561	0.00987163	ENSCAFG00000029885-OR4C15	intergenic_region
24	TIGRP2P315671_rs8490004	29917639	A	G	0.0721501	2.005	0.00988564	CHD6-PTPRT	intergenic_region
3	BICF2G630357407	90219273	G	A	0.0597983	2.00495	0.00988666	RPL7A-ENSCAFG00000016642	intergenic_region
13	BICF2G630663123	34724578	A	C	0.422688	2.00436	0.00990022	TRAPPC9	intron_variant
15	TIGRP2P198958_rs9132287	34608709	A	G	0.495677	2.00435	0.00990044	CCDC41-TMCC3	intergenic_region
6	BICF2P158918	56109611	A	G	0.366522	2.00413	0.00990529	SNORD58-FAM69A	intergenic_region
4	BICF2G630168069	74253446	G	A	0.141509	2.00322	0.00992615	TARS-NPR3	intergenic_region
5	BICF2S22911048	18502362	A	G	0.151515	2.00292	0.00993301	CADM1-ENSCAFG00000026790	intergenic_region
28	BICF2P1094360	16753726	G	A	0.0792507	2.00258	0.00994081	CCDC147	3_prime_UTR_variant
1	TIGRP2P16671_rs9202034	21102932	A	C	0.0864553	2.00156	0.00996418	C18orf54	intron_variant

## Sheet: Length
Table S1. List of all SNPs (p < 0.01) associated with length that were used for gene set and pathway analysis
Chr	SNP	Position (bp)	A1	A2	Freq	p-values	Official gene name	Location
3	BICF2P772349	62323843	A	G	0.28644	4.42e-06	FGFR3	upstream_gene_variant
23	BICF2P580549	49471629	A	G	0.269509	5.42e-06	PLCH1	intron_variant
31	BICF2S2366810	40675954	C	A	0.254098	3.71e-05	0	0
15	BICF2P517149	41228320	A	G	0.243497	3.98e-05	IGF1	intron_variant
35	BICF2G630778876	25711203	G	A	0.172938	4.18e-05	SCAND3	intron_variant
26	BICF2S23121945	7402315	G	A	0.227601	4.82e-05	ENSCAFG00000008038	upstream_gene_variant
32	BICF2P454846	10830385	A	G	0.159682	6.74e-05	SPARCL1	downstream_gene_variant
21	BICF2P493874	48388824	A	G	0.403902	6.99e-05	BDNF-U6	intergenic_region
5	BICF2S23419975	21241106	C	A	0.308526	7.5e-05	ALG9	intron_variant
5	BICF2S23419974	21241159	A	G	0.308526	7.5e-05	ALG9	intron_variant
33	BICF2G630246650	9200532	G	A	0.105491	0.000115966	7SK-ENSCAFG00000009682	intergenic_region
17	BICF2G630205031	48684216	A	C	0.385007	0.000131564	RTKN	upstream_gene_variant
5	BICF2P1364834	11709571	A	G	0.111272	0.000137064	UBASH3B-cfa-mir-99a-2	intergenic_region
17	BICF2G630205084	48668243	A	C	0.323188	0.000143455	WBP1	downstream_gene_variant
1	BICF2S23036326	79872373	C	G	0.125	0.000145126	7SK-ENSCAFG00000030357	intergenic_region
9	BICF2P1181182	38318828	G	A	0.0753623	0.000147405	RFFL	upstream_gene_variant
12	BICF2S23519255	12725009	A	G	0.489855	0.000151734	AARS2-U6	intergenic_region
3	BICF2S2377250	93890772	A	G	0.112717	0.000163241	0	0
7	BICF2G630465252	4349453	A	G	0.231936	0.000189514	PTPRC-ATP6V1G3	intergenic_region
1	BICF2P425836	72748118	C	A	0.469653	0.00019399	DAPK1-GAS1	intergenic_region
9	BICF2S24117588	59283628	A	C	0.182803	0.000194114	DENND1A	intron_variant
12	BICF2S23338638	28194934	C	A	0.471739	0.000205133	U6	upstream_gene_variant
9	BICF2G630835693	36973872	G	C	0.132225	0.000214466	ACACA	splice_region_variant&intron_variant
7	BICF2S23041291	18622814	A	G	0.149566	0.000225	IVNS1ABP-HMCN1	intergenic_region
7	BICF2P1268962	20862189	A	G	0.439219	0.00023805	FAM20B-RALGPS2	intergenic_region
22	BICF2G630331841	41677207	A	C	0.328035	0.000255113	ENSCAFG00000005303-U6	intergenic_region
19	BICF2P1151337	13998398	G	A	0.334538	0.000258984	U6-ENSCAFG00000003946	intergenic_region
1	BICF2S2349996	51704488	G	A	0.324422	0.000264906	ENSCAFG00000000770	intron_variant
8	BICF2P50301	3465545	C	A	0.172018	0.000271013	SLC7A8	intron_variant
5	BICF2P945533	54606497	A	G	0.361272	0.000308894	ACOT11-SSBP3	intergenic_region
7	BICF2P1348825	20921590	A	G	0.0606936	0.000311119	RALGPS2	intron_variant
36	BICF2S23758106	29530590	A	G	0.0520231	0.000314558	TFPI-7SK	intergenic_region
1	TIGRP2P7522_rs8845605	74807859	G	A	0.118497	0.000315617	NTRK2-U6	intergenic_region
5	BICF2P764765	15273223	G	A	0.0745297	0.000329648	KMT2A	upstream_gene_variant
28	BICF2G630268912	25034623	A	G	0.0794798	0.000333244	TDRD1	intron_variant
25	BICF2G630100647	35222157	A	C	0.107659	0.000334439	NPM2-XPO7	intergenic_region
32	BICF2P24237	11343517	A	G	0.0628613	0.00037475	IBSP-SPP1	intergenic_region
11	BICF2S23728110	43963941	A	G	0.376274	0.000412781	ENSCAFG00000007543-U6	intergenic_region
2	BICF2S22958131	25096035	C	A	0.192197	0.000420124	CELF2	intron_variant
1	BICF2P259582	65110552	G	A	0.234104	0.000421694	TRMT11-CENPW	intergenic_region
2	BICF2P267812	66005696	A	C	0.268786	0.000424387	CBLN1-N4BP1	intergenic_region
29	TIGRP2P366812_rs9058390	23346471	A	G	0.115607	0.00043513	CRISPLD1	upstream_gene_variant
1	BICF2P1284553	47130003	C	A	0.061756	0.000436034	ZDHHC14	intron_variant
8	BICF2P1158678	17063335	A	G	0.328171	0.000454931	ENSCAFG00000028068-SNORA5	intergenic_region
1	BICF2P582972	65149894	A	G	0.236614	0.000463093	TRMT11-CENPW	intergenic_region
7	BICF2P519257	56492274	C	A	0.221821	0.000470949	CCDC178	intron_variant
37	BICF2P229566	6678824	A	G	0.224313	0.000474283	ENSCAFG00000010791	intron_variant
37	BICF2P218778	19425737	G	A	0.395501	0.00049311	ERBB4	intron_variant
4	BICF2P1469250	19941806	A	G	0.117052	0.000493304	CCAR1	intron_variant
16	BICF2P391082	24138669	A	G	0.0722543	0.000498191	GOLGA7-SFRP1	intergenic_region
9	BICF2G630474517	59273775	G	A	0.187861	0.000525626	DENND1A	intron_variant
1	BICF2P337159	12480815	A	G	0.119942	0.000539845	ENSCAFG00000026536-5S_rRNA	intergenic_region
7	BICF2P1397724	22833081	A	G	0.310694	0.000547493	PAPPA2	intron_variant
30	BICF2G630411796	6594572	A	G	0.0888728	0.000548481	U6-U6	intergenic_region
12	G731f67S101	24593050	A	C	0.259045	0.000549713	PRIM2	intron_variant
2	BICF2P1211790	36329518	A	G	0.474711	0.00055012	PCDHGB1	downstream_gene_variant
8	TIGRP2P117258_rs8962945	55763109	A	C	0.38712	0.000563521	5S_rRNA-U6	intergenic_region
24	BICF2G630505889	19218544	A	C	0.473988	0.000585274	ENSCAFG00000025524-ENSCAFG00000006763	intergenic_region
5	BICF2P1034640	58614993	G	A	0.397399	0.000607289	C1orf174-AJAP1	intergenic_region
20	BICF2P882643	34465722	A	C	0.149566	0.000621429	ERC2	intron_variant
9	BICF2S23451571	60739837	C	A	0.37211	0.000660249	DAB2IP	intron_variant
9	BICF2G630835753	37047450	G	A	0.37799	0.000664365	ACACA	intron_variant
28	BICF2P130971	14524731	A	G	0.0816474	0.000691215	C10orf76	intron_variant
1	BICF2S23120955	48450234	A	G	0.244942	0.000698128	TAGAP-FNDC1	intergenic_region
28	BICF2G630274410	16074084	A	G	0.323699	0.000700669	SH3PXD2A	intron_variant
26	BICF2G630197048	38229090	A	G	0.0549133	0.000713254	RNLS	intron_variant
1	BICF2S2377557	72815485	A	G	0.151012	0.000714205	DAPK1-GAS1	intergenic_region
8	BICF2P216464	54938047	A	T	0.434877	0.000723183	5S_rRNA-U6	intergenic_region
37	BICF2S23718102	28688154	A	C	0.0736994	0.000725365	ENSCAFG00000016094	missense_variant
18	BICF2G630697082	40434507	G	A	0.207488	0.000731951	ENSCAFG00000031864-ENSCAFG00000030463	intergenic_region
6	BICF2S23449922	24875516	G	A	0.21604	0.000736847	ENSCAFG00000024109	intron_variant
36	TIGRP2P413226_rs8920935	22607748	G	A	0.143271	0.00076818	CCDC141	intron_variant
9	BICF2P1053335	33547182	G	A	0.343931	0.000776596	PPM1E	intron_variant
36	BICF2G630760087	22610692	G	A	0.127168	0.00079454	CCDC141	intron_variant
9	BICF2G630475174	60417635	A	G	0.263006	0.000809707	NDUFA8	intron_variant
9	BICF2P357957	59707459	G	A	0.257225	0.000828329	RABGAP1	intron_variant
23	BICF2G630367403	49603786	G	A	0.486994	0.00082983	GMPS	intron_variant
8	BICF2P1339657	4090790	G	A	0.200867	0.000830046	NRL	upstream_gene_variant
3	BICF2S23355278	69995706	G	A	0.483728	0.000837887	STX18-MSX1	intergenic_region
28	BICF2G630274365	16111105	G	A	0.350781	0.000858911	SH3PXD2A	intron_variant
22	BICF2G630327760	35528155	A	G	0.184971	0.000858922	ENSCAFG00000005271-ENSCAFG00000005282	intergenic_region
28	BICF2G630269023	24874642	A	G	0.366329	0.000859207	NHLRC2-ADRB1	intergenic_region
9	BICF2S23059999	55211825	A	G	0.484827	0.00088865	TRUB2-SWI5	intergenic_region
9	BICF2P751777	37729220	C	A	0.332127	0.000890899	ENSCAFG00000023350-ENSCAFG00000032731	intergenic_region
9	TIGRP2P130673_rs9162745	55172832	A	G	0.21604	0.000892939	ENSCAFG00000029247	upstream_gene_variant
23	BICF2G630362669	53903867	A	C	0.0535456	0.000899692	0	0
1	BICF2P1019161	124975997	A	G	0.236957	0.000908184	0	0
3	TIGRP2P46301_rs8960321	56022284	A	G	0.0867052	0.000923588	MEX3B-TMC3	intergenic_region
5	BICF2G630189148	50381560	A	G	0.289474	0.000929678	FGGY	intron_variant
14	BICF2S23319101	32696911	G	A	0.310931	0.000932539	U6atac-HDAC9	intergenic_region
1	BICF2S22912197	73729076	A	G	0.371387	0.000933498	NAA35	intron_variant
22	BICF2G630327753	35501676	C	A	0.199422	0.000935671	ENSCAFG00000005271-ENSCAFG00000005282	intergenic_region
9	BICF2P554982	43133661	C	G	0.21315	0.000936879	SEZ6	intron_variant
11	TIGRP2P150779_rs8716667	64481776	A	G	0.100434	0.000951712	FRRS1L-PTPN3	intergenic_region
2	BICF2P1370915	55896452	A	G	0.123555	0.000952513	TNPO1-FCHO2	intergenic_region
20	BICF2P1043560	53607445	A	G	0.0650289	0.00098696	TNFSF14	missense_variant
26	TIGRP2P346490_rs9063176	6971318	A	G	0.418234	0.000990687	ZCCHC8-CLIP1	intergenic_region
13	BICF2S23138137	42302989	A	G	0.306358	0.000997005	GABRG1-GABRA2	intergenic_region
13	BICF2P163461	42310177	G	A	0.306358	0.000997005	GABRG1-GABRA2	intergenic_region
7	BICF2P321194	77744350	A	C	0.476156	0.00100549	TUBB6	intron_variant
3	BICF2G630361903	94287447	A	G	0.153902	0.00103278	0	0
3	BICF2G630340128	44622942	A	G	0.32659	0.0010419	ENSCAFG00000026734	downstream_gene_variant
23	BICF2P1346246	12616231	A	G	0.408237	0.0010426	GPD1L	intron_variant
9	BICF2S2314648	63486227	A	G	0.359104	0.00104301	0	0
23	TIGRP2P305555_rs8730111	40003431	G	A	0.264451	0.00107524	C3orf58-ENSCAFG00000008047	intergenic_region
32	BICF2P51475	8743393	A	G	0.288295	0.00107544	U6-ARHGAP24	intergenic_region
23	BICF2G630364794	51950029	G	A	0.0686416	0.001078	GFM1	intron_variant
22	BICF2G630322134	21859740	A	G	0.472424	0.00107986	U6-PCDH9	intergenic_region
34	TIGRP2P398594_rs8590765	32961897	A	G	0.124277	0.00112167	GOLIM4-ENSCAFG00000014605	intergenic_region
1	BICF2P1359193	72729731	A	G	0.484104	0.00113164	DAPK1-GAS1	intergenic_region
7	BICF2P509591	21897620	G	A	0.365607	0.00113371	SEC16B-BRINP2	intergenic_region
10	BICF2P1154532	9738187	G	A	0.12789	0.00113628	CAND1-DYRK2	intergenic_region
8	BICF2P799555	3736941	A	T	0.199275	0.00115597	NGDN-ZFHX2	intergenic_region
9	BICF2G630472745	55554206	A	C	0.249277	0.0011631	ENG	upstream_gene_variant
32	BICF2P928136	26978204	G	A	0.172688	0.00117281	TBCK	intron_variant
17	BICF2P265887	15516285	G	A	0.476156	0.00118251	U4-HS1BP3	intergenic_region
1	BICF2G630718970	36778795	C	G	0.230205	0.00118277	ENSCAFG00000000327-EPM2A	intergenic_region
16	BICF2P726769	41845896	A	G	0.128613	0.00118938	ENSCAFG00000028470-ENSCAFG00000028501	intergenic_region
18	BICF2P655460	50718755	G	A	0.427023	0.00121359	RBM14	downstream_gene_variant
17	BICF2P231095	47529770	C	A	0.0867052	0.00121831	ENSCAFG00000029634-ENSCAFG00000032721	intergenic_region
22	BICF2G630323283	24427983	A	G	0.0946532	0.00129289	KLHL1	intron_variant
7	BICF2S23442596	77735816	G	A	0.49711	0.00130063	TUBB6	intron_variant
22	BICF2S23620388	10642290	A	C	0.0939306	0.00132205	U6-5S_rRNA	intergenic_region
1	BICF2S23740150	46383375	C	A	0.110549	0.00132646	ARID1B	intron_variant
1	BICF2P1385937	89459991	G	A	0.146165	0.00132948	DOCK8-KANK1	intergenic_region
11	BICF2S23336218	46838606	G	A	0.374277	0.00133026	ENSCAFG00000026571	upstream_gene_variant
5	BICF2P573035	60029234	A	G	0.0765896	0.00133497	CHD5	downstream_gene_variant
5	BICF2S22929699	60049801	G	A	0.0765896	0.00133497	HES2	downstream_gene_variant
5	BICF2P815877	58630166	G	A	0.374277	0.00134789	C1orf174-AJAP1	intergenic_region
3	BICF2G630340083	44551778	A	T	0.487699	0.00135569	NR2F2-ENSCAFG00000026734	intergenic_region
37	BICF2P680962	17589473	A	G	0.298842	0.00135622	MAP2	intron_variant
28	BICF2G630274436	16012713	G	A	0.300578	0.00136062	U4	upstream_gene_variant
24	BICF2P1252728	40455938	A	G	0.136561	0.00138652	U6-CBLN4	intergenic_region
9	BICF2P53257	33963114	G	A	0.335366	0.00140042	YPEL2-DHX40	intergenic_region
19	BICF2G63052262	34746699	A	C	0.0606936	0.00142337	DPP10-ARP3	intergenic_region
21	BICF2P943822	43369969	A	G	0.240607	0.00143443	NELL1	intron_variant
5	BICF2G630239639	72956060	C	A	0.066474	0.00143881	WWOX	intron_variant
24	BICF2G630509944	14148172	G	A	0.270622	0.00144213	TMX4	intron_variant
39	BICF2G6302052	125763431	A	G	0.232996	0.00147104	0	0
8	TIGRP2P112187_rs8910636	36258529	A	G	0.434249	0.00147433	PRKCH	intron_variant
16	BICF2P973879	38902117	G	A	0.111994	0.00148129	TUSC3	intron_variant
32	BICF2G630600200	8385378	G	A	0.287265	0.00148133	CDS1	intron_variant
7	TIGRP2P99076_rs8887761	54627863	G	A	0.192919	0.00148794	ENSCAFG00000017884-ZNF396	intergenic_region
9	BICF2P1386634	9683637	A	G	0.183526	0.00151477	MAPT-SPPL2C	intergenic_region
12	TIGRP2P164149_rs8701421	41676717	A	G	0.481214	0.00151795	BCKDHB-ENSCAFG00000032044	intergenic_region
5	BICF2G630189165	50395816	A	G	0.29263	0.00153009	FGGY	intron_variant
18	BICF2S24412094	7992883	G	A	0.304913	0.00153095	GLI3	intron_variant
25	BICF2S23438782	41597195	T	A	0.32106	0.00153308	PID1-DNER	intergenic_region
8	BICF2P326070	3114775	A	C	0.197977	0.00153718	OXA1L	intron_variant
5	BICF2P578358	61676536	A	G	0.362319	0.00157846	ERRFI1-SLC45A1	intergenic_region
4	BICF2G630169242	76295434	A	G	0.0734012	0.00158899	ENSCAFG00000018956-U6	intergenic_region
5	BICF2S23255824	11680172	A	T	0.106214	0.00159188	UBASH3B-cfa-mir-99a-2	intergenic_region
9	BICF2P856172	56834230	C	A	0.0700867	0.0016295	MVB12B	intron_variant
5	BICF2S2329683	15842557	A	C	0.154624	0.00163777	FXYD2-ENSCAFG00000029861	intergenic_region
26	BICF2P227246	34072480	A	C	0.0881503	0.00163969	PCDH15	intron_variant
9	BICF2P867356	48060584	A	G	0.138006	0.00165895	EHMT1	intron_variant
23	BICF2P979029	43104394	G	A	0.0809249	0.00166534	ENSCAFG00000032541-U6	intergenic_region
29	BICF2G630633896	38411036	A	C	0.146676	0.00166852	RUNX1T1-U6	intergenic_region
22	BICF2G630322071	21798535	A	G	0.473227	0.00166962	U6-PCDH9	intergenic_region
1	BICF2P795193	58584136	G	A	0.371014	0.00168557	PLN	upstream_gene_variant
21	BICF2P1104975	38945165	A	G	0.28396	0.00169513	SOX6	intron_variant
1	BICF2G630794838	79796714	A	G	0.218208	0.0017006	7SK-ENSCAFG00000030357	intergenic_region
22	BICF2G630322080	21805861	A	G	0.474711	0.00171425	U6-PCDH9	intergenic_region
9	BICF2G630474664	59771940	A	G	0.20159	0.00173707	RABGAP1	intron_variant
9	BICF2G630472995	55805008	A	G	0.20448	0.00173965	FAM129B	intron_variant
1	BICF2S23032952	69394177	A	C	0.118669	0.00174285	AKAP7	intron_variant
5	BICF2P1384061	34110469	G	A	0.122255	0.00175566	WDR16	intron_variant
7	BICF2P802850	4361271	A	G	0.243497	0.00176519	PTPRC-ATP6V1G3	intergenic_region
6	TIGRP2P77618_rs8741496	11350761	A	G	0.0839363	0.00179885	ENSCAFG00000015459	downstream_gene_variant
24	BICF2G630500761	29716043	A	G	0.3589	0.00180588	CHD6-PTPRT	intergenic_region
23	BICF2G630364259	52454062	T	A	0.128613	0.0018154	0	0
8	BICF2P933821	56335370	A	G	0.10492	0.00182188	U6-ENSCAFG00000017323	intergenic_region
7	BICF2P497919	6693884	G	A	0.050578	0.00182399	cfa-mir-29b-2-CD34	intergenic_region
22	TIGRP2P291959_rs8669048	29698309	G	A	0.197254	0.00183891	5S_rRNA-U6	intergenic_region
16	BICF2P1320229	28176983	C	A	0.441389	0.00185685	ZNF703-ENSCAFG00000023937	intergenic_region
3	BICF2P261621	69111456	A	G	0.138006	0.00186199	CLNK-ZNF518B	intergenic_region
12	BICF2P703899	22259226	A	C	0.302746	0.00186687	FAM83B	intron_variant
30	BICF2G630411997	5329451	G	A	0.323444	0.00186917	TMCO5A	upstream_gene_variant
1	BICF2P9997	47158767	G	A	0.083815	0.00188628	ZDHHC14	intron_variant
1	BICF2P1144318	47948901	T	A	0.16185	0.00189024	TULP4	stop_gained
1	BICF2P1144317	47951048	C	A	0.16185	0.00189024	TULP4	intron_variant
9	BICF2P57249	48056026	G	A	0.182803	0.00189643	EHMT1	intron_variant
33	BICF2S22949664	16218851	A	G	0.132948	0.00189748	PVRL3-CD96	intergenic_region
6	TIGRP2P78394_rs8651698	13058575	A	G	0.0960983	0.00190312	FOXK1-SDK1	intergenic_region
5	BICF2S23739122	60931806	G	A	0.306358	0.00190543	CAMTA1	intron_variant
9	BICF2S23355768	36375420	A	G	0.0845376	0.00191458	ZNHIT3	upstream_gene_variant
9	BICF2P791837	36397059	A	G	0.0845376	0.00191458	MYO19	intron_variant
36	BICF2G630766314	5031771	A	G	0.212428	0.00192262	ENSCAFG00000009377	downstream_gene_variant
28	BICF2G630265491	35466860	A	G	0.410767	0.00192602	ADAM12	intron_variant
2	BICF2P1305300	41573503	A	G	0.179913	0.00193234	PPP2R2B-STK32A	intergenic_region
3	BICF2S2323000	60737421	G	A	0.149783	0.00193911	7SK-LRPAP1	intergenic_region
26	BICF2P541533	6956974	G	A	0.346098	0.00194023	ZCCHC8-CLIP1	intergenic_region
22	BICF2G630327757	35519142	G	C	0.267728	0.00196334	ENSCAFG00000005271-ENSCAFG00000005282	intergenic_region
34	BICF2G630453769	34954719	A	G	0.103048	0.00196714	CLDN11-SLC7A14	intergenic_region
17	BICF2G630206097	47673259	A	G	0.212428	0.00196831	GCFC2	intron_variant
1	BICF2P1105636	93855625	G	A	0.345376	0.00197502	ERMP1	intron_variant
36	BICF2G630759072	23864413	A	G	0.0556358	0.00197814	CWC22-U6	intergenic_region
20	BICF2P742564	54431380	A	G	0.102601	0.00201706	SAFB2-ZNRF4	intergenic_region
16	TIGRP2P215897_rs9104098	41699998	A	G	0.433976	0.00203012	ENSCAFG00000028470-ENSCAFG00000028501	intergenic_region
10	BICF2P668598	71392546	A	C	0.133968	0.00204489	0	0
36	BICF2P936625	22105511	A	G	0.307803	0.00205595	FKBP7	upstream_gene_variant
37	TIGRP2P421715_rs8957850	28701985	G	A	0.099711	0.00206686	ENSCAFG00000016094	downstream_gene_variant
36	BICF2G630760565	22062944	G	A	0.25289	0.00209061	PRKRA	intron_variant
8	BICF2S24410075	63084196	A	G	0.296965	0.00210856	ENSCAFG00000017617	intron_variant
1	BICF2S23742416	60435549	A	C	0.0686416	0.00213926	U4-ENSCAFG00000030746	intergenic_region
22	BICF2G630322099	21817969	C	A	0.473227	0.00214021	U6-PCDH9	intergenic_region
9	BICF2G630472761	55573992	A	G	0.244942	0.00214196	ENG	intron_variant
21	BICF2P769253	41145579	G	A	0.447254	0.00214266	PTPN5-ENSCAFG00000009402	intergenic_region
22	BICF2G630322105	21826082	A	C	0.473266	0.00214914	U6-PCDH9	intergenic_region
22	BICF2G630322106	21826149	G	A	0.473266	0.00214914	U6-PCDH9	intergenic_region
22	BICF2G630322111	21829717	T	A	0.473266	0.00214914	U6-PCDH9	intergenic_region
28	BICF2G630267705	27242009	A	G	0.358382	0.00219222	HSPA12A	intron_variant
17	TIGRP2P232831_rs8987981	47652928	C	A	0.150289	0.00220424	GCFC2	intron_variant
7	BICF2P391679	28129316	A	G	0.169798	0.00221464	PRRX1	intron_variant
9	BICF2G630475168	60273060	A	G	0.155347	0.00221691	MRRF	intron_variant
12	BICF2P222928	59313787	A	G	0.335517	0.00226458	ACA64-GRIK2	intergenic_region
12	BICF2P14848	22814117	A	G	0.389451	0.00227973	HMGCLL1	intron_variant
9	BICF2P252311	43292661	A	G	0.132417	0.00228229	MYO18A	intron_variant
20	BICF2P908983	34132662	A	G	0.127551	0.00230455	ERC2	intron_variant
8	BICF2S2369564	59042749	A	G	0.250362	0.00232991	SNORA62-GALC	intergenic_region
18	BICF2G630691658	47746093	A	C	0.216374	0.00235208	SHANK2	intron_variant
7	BICF2G630550745	11288059	A	G	0.33526	0.00235595	RPS6KC1	intron_variant
30	BICF2G630411351	7532597	A	G	0.314306	0.00235929	C15orf52-DISP2	intergenic_region
24	BICF2P1292599	22785586	T	A	0.0599711	0.00237504	CBFA2T2	intron_variant
24	BICF2S23241658	22787217	A	G	0.0599711	0.00237504	CBFA2T2	intron_variant
24	BICF2S23241659	22787263	G	A	0.0599711	0.00237504	CBFA2T2	intron_variant
24	BICF2S24117809	22797494	G	A	0.0599711	0.00237504	CBFA2T2	intron_variant
17	BICF2P1464853	50508370	G	A	0.471098	0.00238223	EXOC6B	intron_variant
9	BICF2G630472427	54642128	A	G	0.0635838	0.00240771	CRAT	intron_variant
18	BICF2P1106097	26659957	A	T	0.182803	0.00240942	API5-7SK	intergenic_region
27	BICF2G630141695	14859996	G	A	0.152457	0.00241086	CPNE8-U6atac	intergenic_region
9	BICF2G630835711	37020059	A	T	0.427023	0.00241869	ACACA	intron_variant
9	BICF2G630835732	37035203	A	G	0.427023	0.00241869	ACACA	intron_variant
24	BICF2S23414628	13543963	A	G	0.346098	0.00242	PLCB1	intron_variant
21	BICF2P1337438	46115899	A	G	0.447902	0.00242136	LUZP2	intron_variant
35	BICF2G630775553	20946280	A	C	0.42341	0.00244089	PRL-5S_rRNA	intergenic_region
9	BICF2P623039	38503122	A	G	0.091763	0.00244552	ENSCAFG00000030750-ENSCAFG00000018340	intergenic_region
9	BICF2G630472790	55650085	G	A	0.230491	0.00244771	SH2D3C	intron_variant
22	TIGRP2P296234_rs9198407	54718266	A	G	0.214595	0.00245855	ENSCAFG00000022848-Y_RNA	intergenic_region
5	BICF2P958242	63057251	A	C	0.145349	0.00246966	CTNNBIP1	intron_variant
24	TIGRP2P311971_rs8578093	19065717	A	G	0.452312	0.00247113	PDYN-ENSCAFG00000025524	intergenic_region
1	BICF2G630716201	32500480	A	G	0.171014	0.00247334	ENSCAFG00000024055-ENSCAFG00000000289	intergenic_region
19	BICF2G630256607	49418569	A	G	0.376445	0.00247356	U6-ACVR2A	intergenic_region
5	BICF2P185733	15642829	A	G	0.311416	0.00247699	TMPRSS4-IL10RA	intergenic_region
17	BICF2G630203719	50407911	A	G	0.120665	0.00248324	EXOC6B	intron_variant
22	BICF2P1263175	45466572	G	A	0.431983	0.00250731	GPR180-ENSCAFG00000028798	intergenic_region
31	BICF2G630729349	9030416	C	A	0.0823699	0.00251491	ROBO1-U6	intergenic_region
24	BICF2G630510902	13065429	G	A	0.356214	0.00253233	PLCB4-PLCB1	intergenic_region
20	BICF2P970167	61200900	A	G	0.231936	0.00253441	0	0
2	BICF2P926077	78197122	G	A	0.418353	0.00253556	HP1BP3	intron_variant
7	BICF2S23020309	52286125	A	C	0.179191	0.00254216	U6-KIAA1328	intergenic_region
16	TIGRP2P226196_rs8638377	60116285	A	G	0.21604	0.00254383	0	0
26	BICF2S22929155	34025877	A	G	0.348988	0.0025451	PCDH15	intron_variant
21	BICF2P241898	43365240	A	G	0.248555	0.00255845	NELL1	intron_variant
38	BICF2S2361705	4129811	A	G	0.218524	0.00256391	Y_RNA-HRPT2	intergenic_region
30	BICF2G630398238	38029193	A	G	0.160405	0.00259432	SCAMP5	3_prime_UTR_variant
30	BICF2P1240545	37058266	C	A	0.25578	0.00259975	C15orf59-TBC1D21	intergenic_region
3	BICF2S23723485	88430732	A	G	0.169075	0.00260424	GPR125-KCNIP4	intergenic_region
6	BICF2G630810040	10561492	T	A	0.0484104	0.00260515	TRRAP	intron_variant
5	BICF2P378508	54231348	A	C	0.344653	0.00261267	BSND	intron_variant
29	BICF2S2341391	18619219	A	G	0.294798	0.00263389	ENSCAFG00000007660-SULF1	intergenic_region
7	BICF2P726587	22418607	G	A	0.105491	0.00263871	BRINP2-ASTN1	intergenic_region
8	BICF2S23044226	56182267	A	G	0.103324	0.00264455	U6-ENSCAFG00000017323	intergenic_region
24	BICF2G630508788	15709243	G	A	0.162572	0.00264962	7SK-FERMT1	intergenic_region
3	BICF2G630340127	44615782	A	G	0.264451	0.00265582	NR2F2-ENSCAFG00000026734	intergenic_region
30	TIGRP2P373874_rs8823344	40576613	G	A	0.0635659	0.00266465	0	0
10	BICF2G630478157	22706146	G	A	0.403179	0.00267025	ARFGAP3	intron_variant
17	BICF2G630217586	17698571	A	G	0.484827	0.00267649	TDRD15-KLHL29	intergenic_region
6	BICF2P699862	14845203	G	A	0.327312	0.00268982	SNX8	intron_variant
21	TIGRP2P279418_rs9184525	12441117	A	C	0.151012	0.00269216	TMEM135	intron_variant
14	BICF2G630525895	34221891	A	G	0.148121	0.00269293	MACC1	intron_variant
22	BICF2S2345508	26510078	A	C	0.150218	0.0027021	DACH1-SNORA42	intergenic_region
8	BICF2S22951928	75141478	A	G	0.15919	0.00271356	0	0
9	BICF2G630836601	38666161	A	G	0.336469	0.00272202	SNORA70-TMEM132E	intergenic_region
18	BICF2G630696686	40964730	G	A	0.286127	0.00273339	ENSCAFG00000029885-OR4C15	intergenic_region
1	BICF2P1119618	71574862	A	G	0.45448	0.00273882	FANCC	intron_variant
27	BICF2P645050	12317801	G	A	0.153902	0.0027411	PDZRN4	intron_variant
10	BICF2S23022363	37647571	G	A	0.403179	0.00274245	NCK2-FHL2	intergenic_region
22	BICF2S23414416	48587848	A	G	0.16185	0.00274392	STK24	intron_variant
22	BICF2P1376531	63964054	C	A	0.34058	0.00275033	0	0
9	BICF2P284322	53860854	A	G	0.304913	0.00275128	ENSCAFG00000028727-FNBP1	intergenic_region
17	TIGRP2P233558_rs8623446	50270959	G	A	0.340318	0.00275235	EXOC6B	intron_variant
28	BICF2G630265488	35467679	G	A	0.406657	0.00277478	ADAM12	intron_variant
13	BICF2P1193484	36250566	A	G	0.12789	0.002817	ENSCAFG00000028767-ENSCAFG00000031926	intergenic_region
7	TIGRP2P92583_rs9213868	22047588	G	A	0.209538	0.00286696	SEC16B-BRINP2	intergenic_region
36	TIGRP2P416375_rs8621264	6333278	A	G	0.486994	0.0028698	RBMS1-TANK	intergenic_region
21	BICF2G630642324	49236444	A	G	0.453757	0.00287471	U6-U6	intergenic_region
5	BICF2S23655756	60063887	A	G	0.0751445	0.00288537	CHD5	intron_variant
1	BICF2G630711817	18023479	A	G	0.147399	0.00288627	NEDD4L-ATP8B1	intergenic_region
21	TIGRP2P281650_rs8997963	29568560	A	G	0.191474	0.00290123	CNGA4	upstream_gene_variant
4	BICF2P513834	19264297	A	G	0.0888728	0.00290554	U6	downstream_gene_variant
3	BICF2P1107935	32710231	G	A	0.272399	0.00294227	OCA2	intron_variant
3	BICF2P1068900	72544096	A	G	0.197522	0.0029437	PDS5A	intron_variant
1	TIGRP2P7273_rs8721297	71576076	A	G	0.395954	0.00297897	FANCC	intron_variant
26	TIGRP2P346753_rs9226110	7594716	A	G	0.414017	0.00298221	ORAI1	intron_variant
3	BICF2P432596	71453898	T	A	0.191304	0.00299327	UCHL1-ENSCAFG00000007718	intergenic_region
22	BICF2P641817	46578922	A	G	0.195809	0.00299667	UGGT2	intron_variant
2	BICF2P1021114	57331154	G	A	0.398121	0.00301392	FAM169A	missense_variant
21	BICF2S23217413	41037080	A	G	0.0643064	0.00301524	SPTY2D1	intron_variant
9	BICF2G630474853	59991734	A	G	0.212428	0.00301683	OR5C1-ENSCAFG00000020257	intergenic_region
7	BICF2P556304	32733376	C	A	0.411127	0.00303428	RGS7-FH	intergenic_region
27	BICF2P649237	36671069	G	A	0.118497	0.00304189	A2M	intron_variant
3	BICF2G630356714	89820656	G	A	0.405072	0.00304779	RPL7A-ENSCAFG00000016642	intergenic_region
9	BICF2G630472749	55559601	C	A	0.218208	0.00305429	ENG	intron_variant
27	BICF2S2356817	33123312	G	A	0.354769	0.00305572	GRIN2B-EMP1	intergenic_region
9	BICF2P154580	56783385	A	C	0.11037	0.0030581	MVB12B	intron_variant
8	BICF2P362874	55932428	G	A	0.111994	0.0030629	U6-ENSCAFG00000017323	intergenic_region
8	BICF2S2367229	45077547	G	A	0.19102	0.00307063	PCNX-SIPA1L1	intergenic_region
3	TIGRP2P51126_rs8638818	73025435	G	A	0.388728	0.00307859	KLB	intron_variant
5	BICF2S23553838	64340765	A	G	0.367052	0.00308137	ACSF3	upstream_gene_variant
7	BICF2P701615	32765899	G	A	0.0868307	0.00309158	RGS7-FH	intergenic_region
9	BICF2G630474227	58860194	A	G	0.416787	0.00310388	LHX2-DENND1A	intergenic_region
4	BICF2P222868	38897394	A	G	0.123555	0.00310534	BOD1	downstream_gene_variant
16	BICF2S23232128	36584660	A	G	0.313584	0.00310651	DLC1	intron_variant
9	BICF2S23741434	3043254	A	C	0.126445	0.00312093	TNRC6C	intron_variant
11	BICF2G630303060	61985844	A	G	0.140058	0.00313597	TMEM38B-ZNF462	intergenic_region
13	BICF2P226053	36233682	G	A	0.128613	0.00313743	ENSCAFG00000028767-ENSCAFG00000031926	intergenic_region
34	BICF2P525494	20498463	A	C	0.322721	0.00314162	BCL6-LPP	intergenic_region
4	BICF2P373715	17256830	A	G	0.137283	0.00314695	REEP3-CTNNA3	intergenic_region
16	BICF2P356666	41998567	A	G	0.458092	0.00316915	ENSCAFG00000028470-ENSCAFG00000028501	intergenic_region
16	BICF2P742018	42015699	G	A	0.458092	0.00316915	ENSCAFG00000028470-ENSCAFG00000028501	intergenic_region
1	BICF2G630723164	42424999	C	G	0.115607	0.00317123	SYNE1	intron_variant
9	BICF2P947825	29904024	A	G	0.119942	0.00317525	U6-7SK	intergenic_region
1	TIGRP2P8859_rs8977539	75979153	A	G	0.449422	0.0031765	FRMD3	intron_variant
19	BICF2P52117	54993770	A	G	0.0780347	0.00317907	0	0
6	BICF2P97144	8675095	T	A	0.0635838	0.0031831	MOGAT3	5_prime_UTR_variant
11	BICF2P1218201	55452657	G	A	0.301301	0.00319082	TBC1D2	intron_variant
1	BICF2S23250880	65176226	A	G	0.351879	0.00321141	CENPW	synonymous_variant
5	BICF2G630189132	50371541	A	G	0.318642	0.00321154	FGGY	intron_variant
5	BICF2P1088190	10929591	G	C	0.0736994	0.00321242	GRAMD1B	intron_variant
22	BICF2P344856	10515100	A	G	0.0758671	0.00321307	U6-5S_rRNA	intergenic_region
9	BICF2G630472775	55612232	A	G	0.0875543	0.00321718	CDK9	downstream_gene_variant
9	BICF2G630471730	53971544	A	G	0.196532	0.00323041	USP20	missense_variant
11	BICF2S23642349	43950585	C	A	0.361272	0.00324385	ENSCAFG00000007543-U6	intergenic_region
4	BICF2P1271760	4775771	G	A	0.122287	0.0032466	RBM34	intron_variant
5	BICF2P333047	59208734	A	G	0.180636	0.00324663	AJAP1-NPHP4	intergenic_region
34	BICF2G630456401	32073316	A	G	0.0855072	0.00325356	ENSCAFG00000014497-ZBBX	intergenic_region
20	BICF2P1328570	36645228	A	G	0.253613	0.00325485	DCP1A	intron_variant
29	BICF2G630622429	14480066	C	A	0.169075	0.00325866	CYP7B1	intron_variant
24	BICF2G630509596	14534249	A	G	0.404486	0.00326346	HAO1-BMP2	intergenic_region
7	BICF2P484843	48885877	A	G	0.0614162	0.00328342	ENSCAFG00000017739	upstream_gene_variant
18	BICF2P332267	27741983	G	C	0.117052	0.00329989	U1-LRRC4C	intergenic_region
24	BICF2G630496735	45484853	G	A	0.490607	0.00330394	CDH26-ENSCAFG00000012668	intergenic_region
21	TIGRP2P286458_rs8582243	45714423	G	A	0.153179	0.00330489	UBE2D3-LUZP2	intergenic_region
1	BICF2P1035315	90591406	C	A	0.0895954	0.00330873	ENSCAFG00000001991-SMARCA2	intergenic_region
8	BICF2S23346363	54881129	G	A	0.0541908	0.00331024	5S_rRNA-U6	intergenic_region
1	BICF2S22936688	47344048	G	C	0.341763	0.00331129	SNX9	intron_variant
1	BICF2S22926571	47348193	A	G	0.341763	0.00331129	SNX9	intron_variant
1	BICF2P1325123	64440172	G	A	0.0578035	0.00331492	U6-HEY2	intergenic_region
9	BICF2G630472763	55582299	A	G	0.0874277	0.00331836	FPGS	downstream_gene_variant
34	BICF2P940082	4101768	A	G	0.0803184	0.00331995	FAM173B-7SK	intergenic_region
9	BICF2G630472776	55614162	G	A	0.159682	0.00332126	CDK9	3_prime_UTR_variant
5	BICF2S23757774	62445935	A	G	0.206647	0.00332557	SLC2A5-GPR157	intergenic_region
20	BICF2P797395	36844754	A	C	0.0803184	0.00332977	RFT1-SFMBT1	intergenic_region
25	BICF2S23135796	48992407	G	A	0.359827	0.00334213	ASB1-TWIST2	intergenic_region
29	BICF2G630633145	37292721	A	T	0.234104	0.00336323	RUNX1T1	intron_variant
7	BICF2G630553868	19695109	G	A	0.0693642	0.00336376	ENSCAFG00000013766-PLA2G4A	intergenic_region
37	BICF2P250824	18631467	G	A	0.456585	0.00336449	ENSCAFG00000023462	downstream_gene_variant
26	BICF2P992425	34908229	A	G	0.443642	0.00337409	PCDH15-ENSCAFG00000015550	intergenic_region
6	BICF2S23016168	24866755	G	A	0.184971	0.00337571	ENSCAFG00000024109	intron_variant
13	BICF2G630662940	34926901	A	C	0.322977	0.003377	TRAPPC9	intron_variant
1	BICF2P911751	99045809	A	G	0.195369	0.00337705	SNORA84	upstream_gene_variant
31	BICF2P272953	4116126	A	G	0.230825	0.00339568	ENSCAFG00000032194-ENSCAFG00000029014	intergenic_region
9	TIGRP2P127027_rs8669574	43516731	A	G	0.127168	0.00340678	TAOK1	intron_variant
1	BICF2P1380146	93757515	A	G	0.0802023	0.00340757	U6-KIAA1432	intergenic_region
9	BICF2P817756	7527606	G	A	0.240607	0.00340986	ENSCAFG00000004401-SOX9	intergenic_region
5	BICF2P1304606	10945409	G	C	0.073913	0.0034139	GRAMD1B-ENSCAFG00000028455	intergenic_region
3	BICF2P788663	72575868	G	A	0.187861	0.00342483	PDS5A	intron_variant
31	BICF2G630738883	28806077	A	C	0.252168	0.0034545	ENSCAFG00000031162	intron_variant
4	BICF2P853713	74440418	G	A	0.102601	0.00345855	TARS-NPR3	intergenic_region
34	BICF2S23613552	13018487	G	A	0.259393	0.0034633	NDUFB5	upstream_gene_variant
5	BICF2S23742056	62568325	G	A	0.367583	0.00348226	H6PD	intron_variant
25	BICF2P1461096	49858895	C	G	0.206647	0.0034843	ROMO1-NDUFA10	intergenic_region
6	TIGRP2P77845_rs8807963	12091870	A	G	0.171965	0.00349652	RBAK	intron_variant
26	BICF2G630194898	39562022	A	C	0.161127	0.00349895	0	0
18	BICF2P952466	19332545	A	G	0.227601	0.00350483	MAGI2-GNAI1	intergenic_region
17	TIGRP2P233237_rs9002685	48938665	A	G	0.330202	0.00350672	BOLA3	upstream_gene_variant
7	BICF2S23132312	33330712	G	A	0.268786	0.00351517	BECN1	intron_variant
9	BICF2G630473051	55875536	G	A	0.135116	0.0035164	LRSAM1	intron_variant
20	BICF2S2301452	29919331	G	A	0.289017	0.00351866	ENSCAFG00000007791-U6	intergenic_region
16	BICF2S2454313	35525733	C	A	0.387283	0.00352042	ERI1-MFHAS1	intergenic_region
2	BICF2P294415	36400275	A	G	0.312139	0.00352144	PCDHGC5	intron_variant
5	BICF2G630182500	34032870	A	G	0.175109	0.00352582	STX8	intron_variant
17	BICF2G630204636	49054471	A	G	0.426301	0.003535	TET3	intron_variant
38	BICF2S23158466	26256207	G	A	0.383671	0.00353927	0	0
12	BICF2P614434	41694551	A	G	0.495665	0.00354328	BCKDHB-ENSCAFG00000032044	intergenic_region
9	BICF2G630473035	55847054	C	A	0.271676	0.0035542	FAM129B	intron_variant
20	BICF2P768103	28595379	C	A	0.409682	0.00357784	CADPS	intron_variant
10	BICF2G630491311	57501889	C	A	0.355491	0.00358035	CCDC85A-ENSCAFG00000002932	intergenic_region
31	BICF2S23047985	34566305	A	G	0.319364	0.0035954	PCP4	intron_variant
1	BICF2P1168088	65115252	A	C	0.187139	0.00359784	TRMT11-CENPW	intergenic_region
37	BICF2G630130584	27995726	A	G	0.152457	0.00361889	EPHA4-PAX3	intergenic_region
36	BICF2P343009	15476980	C	A	0.474711	0.00362454	GORASP2	intron_variant
1	BICF2P139505	46810015	A	G	0.158466	0.00364183	ARID1B-TMEM242	intergenic_region
38	BICF2G63074424	15508082	A	G	0.250723	0.00364184	U6atac-HLX	intergenic_region
4	BICF2G630170528	78568535	A	C	0.324891	0.00364293	U6-CDH9	intergenic_region
26	BICF2S23521383	26232169	A	C	0.406069	0.00364583	ENSCAFG00000029467	intron_variant
21	BICF2P318774	47393565	A	G	0.305636	0.00367218	ANO3	intron_variant
7	BICF2P979272	21586876	A	G	0.367583	0.00367795	RASAL2	intron_variant
1	BICF2P709806	120441349	C	A	0.356214	0.00367952	TSHZ3	intron_variant
13	BICF2P816466	46209742	A	G	0.505058	0.00368691	LNX1-CHIC2	intergenic_region
9	BICF2P1343066	55987187	A	G	0.471821	0.00370314	GARNL3	intron_variant
9	BICF2S23235445	55993904	A	G	0.471821	0.00370314	GARNL3	intron_variant
30	BICF2G630408691	19864942	G	A	0.482659	0.00371168	UNC13C	intron_variant
18	BICF2P965319	58169176	A	C	0.342258	0.00372384	0	0
9	BICF2G630473027	55841605	A	C	0.271346	0.00372747	FAM129B	intron_variant
36	BICF2P1181603	16192796	A	G	0.256975	0.00374685	SLC25A12	intron_variant
23	BICF2S23411957	49594860	A	G	0.34877	0.00375729	GMPS	splice_region_variant&intron_variant
4	BICF2P445832	36650040	G	A	0.236994	0.00376647	UNC5A-TSPAN17	intergenic_region
7	BICF2P32656	74073785	A	G	0.463043	0.00377364	PTPRM	intron_variant
36	BICF2P866869	17244342	A	G	0.321536	0.00378321	RAPGEF4	intron_variant
6	BICF2S23729890	11375391	T	A	0.171965	0.00378668	ENSCAFG00000015477	intron_variant
14	BICF2P809457	39751182	A	G	0.153179	0.00379925	SNX10-SKAP2	intergenic_region
37	BICF2G630131194	28786816	G	A	0.16763	0.00380483	MOGAT1-ACSL3	intergenic_region
14	BICF2S2309102	20152020	A	T	0.280347	0.00381327	PEG10-U6	intergenic_region
15	BICF2P1192579	46648326	G	A	0.166185	0.0038242	NR3C2	intron_variant
31	BICF2P798072	10412312	A	G	0.148121	0.00383843	ENSCAFG00000007980-ENSCAFG00000007984	intergenic_region
1	BICF2S23746077	47388140	A	G	0.255058	0.00384507	SNX9	intron_variant
33	BICF2G630249552	13230714	C	A	0.303184	0.00386231	BBX-CD47	intergenic_region
1	BICF2P326688	51647147	A	G	0.382948	0.00386404	ENSCAFG00000000770	intron_variant
36	BICF2S232272	18782394	A	G	0.187776	0.00386649	CHN1	intron_variant
21	BICF2S23149835	47938140	C	A	0.36099	0.00388038	CCDC34	intron_variant
6	BICF2P764928	10499548	A	G	0.100434	0.00388471	SMURF1	downstream_gene_variant
5	BICF2G630187781	47876311	A	G	0.235549	0.00391618	ENSCAFG00000023278	upstream_gene_variant
1	BICF2P722799	48688468	G	A	0.442197	0.00391761	U6-ENSCAFG00000029242	intergenic_region
4	BICF2P1044322	40295913	G	A	0.278582	0.00392764	FBXW11	intron_variant
6	BICF2S23217563	66095723	A	G	0.448401	0.0039378	U6-U12	intergenic_region
4	BICF2S22938930	19241111	A	G	0.403179	0.00394208	HERC4	intron_variant
23	BICF2G630376374	31698033	G	A	0.109827	0.00395088	EPHB1	intron_variant
8	BICF2P447284	42017569	A	G	0.160405	0.00396667	RAD51B-7SK	intergenic_region
7	BICF2P1160547	33301990	A	G	0.0794798	0.00399856	EXO1-BECN1	intergenic_region
8	TIGRP2P117609_rs8581536	56994348	A	G	0.0989884	0.00399984	ENSCAFG00000017325-FLRT2	intergenic_region
37	BICF2P623147	19658023	A	C	0.349493	0.00400695	ERBB4	intron_variant
1	BICF2P448058	68268724	G	A	0.0498555	0.00402472	ARHGAP18-L3MBTL3	intergenic_region
6	BICF2S23634218	67692981	A	G	0.322254	0.0040367	U4-ELTD1	intergenic_region
19	BICF2G63037002	14012257	G	A	0.116498	0.00404391	U6-ENSCAFG00000003946	intergenic_region
31	TIGRP2P376146_rs8556744	26368299	C	A	0.145652	0.00405692	TIAM1-U6	intergenic_region
1	BICF2G630714502	21162036	G	A	0.187861	0.00406193	POLI	downstream_gene_variant
24	BICF2G630510505	13392349	G	C	0.470376	0.00406814	PLCB1	intron_variant
22	BICF2P732583	28000768	A	G	0.25	0.00408227	KLF12	intron_variant
4	BICF2P1401401	90890804	G	A	0.114162	0.00409546	0	0
19	BICF2P1426908	42247278	C	G	0.0758671	0.00411055	NXPH2-LRP1B	intergenic_region
35	BICF2G630768364	7004269	A	G	0.16763	0.0041159	LY86-RREB1	intergenic_region
2	BICF2P161478	65321553	C	A	0.0643064	0.00411751	ENSCAFG00000009226-ENSCAFG00000023585	intergenic_region
2	BICF2P99705	65343383	A	G	0.0643064	0.00411751	ENSCAFG00000023585	intron_variant
24	BICF2P832	45284227	A	G	0.0679191	0.00412361	CDH26-ENSCAFG00000012668	intergenic_region
4	TIGRP2P61424_rs9013759	49818330	A	C	0.136758	0.00412982	GABRB2-ATP10B	intergenic_region
6	BICF2S2323842	12186191	G	A	0.327312	0.00415341	RNF216	intron_variant
8	BICF2P327953	18883179	G	A	0.329957	0.00415584	ENSCAFG00000027558	downstream_gene_variant
37	BICF2G630127657	12595522	G	A	0.0534682	0.00420433	CD28-CD152	intergenic_region
18	BICF2P915830	22808846	G	A	0.212428	0.00420545	PCLO-SEMA3E	intergenic_region
30	BICF2P817229	6992540	T	A	0.421852	0.00422328	GPR176	downstream_gene_variant
27	BICF2P130552	16737572	G	A	0.106214	0.00423352	BICD1-KIAA1551	intergenic_region
18	TIGRP2P240301_rs8864461	18796770	A	G	0.152457	0.00423995	MAGI2-GNAI1	intergenic_region
30	BICF2P803210	28650989	C	A	0.119392	0.00424255	SNX22	missense_variant
18	BICF2P349858	50745999	G	C	0.131503	0.00425548	CCS	3_prime_UTR_variant
27	BICF2P661657	47203478	A	G	0.0758671	0.00427267	0	0
27	TIGRP2P356666_rs8875046	47233426	A	C	0.0758671	0.00427267	0	0
29	BICF2P1053684	33093972	A	G	0.0628613	0.00428252	CNBD1	intron_variant
3	BICF2S23136096	86612659	A	G	0.346821	0.00428411	PPARGC1A-GBA3	intergenic_region
4	BICF2P573769	25567534	G	A	0.308973	0.00428762	COMTD1-ZNF503	intergenic_region
26	BICF2P30954	37170546	A	G	0.385673	0.00429123	ENSCAFG00000015602-U6	intergenic_region
16	BICF2G630843402	12157522	A	G	0.354046	0.00429655	U6-MTPN	intergenic_region
30	TIGRP2P371558_rs9102876	33893819	A	G	0.45	0.00430753	ENSCAFG00000029487	upstream_gene_variant
5	TIGRP2P72958_rs8595976	53609386	A	G	0.470376	0.00431177	PPAP2B-USP24	intergenic_region
12	BICF2G630120030	62571506	A	G	0.271739	0.00432173	BVES	intron_variant
21	BICF2G630640437	50504194	A	C	0.28396	0.00432616	ENSCAFG00000030305	upstream_gene_variant
3	BICF2G630361800	94163416	C	A	0.162572	0.00433444	0	0
28	BICF2P1322747	35739762	A	G	0.331647	0.00433607	C10orf90-DOCK1	intergenic_region
6	BICF2P64033	8670477	A	C	0.106936	0.00433943	MOGAT3	upstream_gene_variant
10	BICF2G630481401	30768736	G	A	0.181358	0.00434599	TIMP3-ENSCAFG00000001752	intergenic_region
9	BICF2P953835	55063714	C	A	0.456585	0.00434874	GLE1	upstream_gene_variant
5	BICF2P291809	47542477	A	G	0.434971	0.00435208	DOCK7	intron_variant
20	TIGRP2P272419_rs8893890	23558530	G	A	0.377168	0.00435368	ENSCAFG00000006583-SUCLG2	intergenic_region
9	BICF2G630472603	55424673	G	A	0.0802023	0.0043543	NAIF1-ENSCAFG00000030758	intergenic_region
13	TIGRP2P179769_rs9102730	51200266	A	G	0.503613	0.00437311	ENSCAFG00000002337-U6	intergenic_region
13	TIGRP2P179766_rs9196444	51190164	C	A	0.503623	0.00437715	ENSCAFG00000002337-U6	intergenic_region
24	BICF2P1242921	13710577	G	A	0.316401	0.00438452	PLCB1-TMX4	intergenic_region
14	BICF2P1347426	11750503	G	A	0.444364	0.00438893	HYAL4-ENSCAFG00000024436	intergenic_region
10	BICF2P676270	14916418	C	A	0.313584	0.00439885	7SK-ATXN7L3B	intergenic_region
9	BICF2G630837233	39885922	A	C	0.450796	0.00440702	ASIC2	intron_variant
3	BICF2S23143105	73883322	A	G	0.226087	0.00440933	KLF3-TBC1D1	intergenic_region
5	BICF2P798692	15681298	A	G	0.278582	0.00443716	IL10RA	intron_variant
9	BICF2G630838912	42531518	C	G	0.128075	0.00443987	U6	downstream_gene_variant
33	BICF2P180869	25074752	A	C	0.362717	0.00444719	IQCB1	intron_variant
5	BICF2P1084522	53984611	A	G	0.382948	0.0044559	PPAP2B-USP24	intergenic_region
20	BICF2P1361112	31155497	A	G	0.345376	0.00447434	FHIT-U4	intergenic_region
22	BICF2P367494	34262625	A	G	0.0895954	0.0044773	U6-ENSCAFG00000028934	intergenic_region
17	BICF2G630205096	48659261	G	A	0.346599	0.00449026	TTC31	upstream_gene_variant
12	TIGRP2P165616_rs9109519	47339052	A	G	0.132225	0.00449075	U6-SPACA1	intergenic_region
16	BICF2G630115238	37594687	A	G	0.146676	0.00449219	SGCZ	intron_variant
35	BICF2P906653	20140208	A	G	0.369942	0.00449671	SOX4-PRL	intergenic_region
37	BICF2P111253	21520946	A	G	0.140173	0.0045073	ENSCAFG00000032634	intron_variant
10	BICF2S23754748	16749953	G	A	0.0751445	0.00452007	NCAPH2	intron_variant
18	BICF2G630696670	40975057	A	G	0.230491	0.00452941	ENSCAFG00000029885-OR4C15	intergenic_region
31	BICF2P696414	4052448	G	A	0.157514	0.00454766	ENSCAFG00000032194-ENSCAFG00000029014	intergenic_region
21	BICF2S23514069	22973360	A	G	0.0910405	0.00455528	MAP6	intron_variant
11	BICF2G630307972	74440105	A	G	0.276734	0.00455746	0	0
13	BICF2P478729	51152591	A	C	0.495658	0.00457192	ENSCAFG00000002337-U6	intergenic_region
3	BICF2S23726155	44648858	A	G	0.46315	0.00459508	ENSCAFG00000026734-SNORA31	intergenic_region
12	TIGRP2P160417_rs8853730	24609358	A	C	0.387283	0.00461761	PRIM2	intron_variant
27	BICF2S22927985	4170470	A	G	0.480435	0.00461776	DIP2B	intron_variant
1	BICF2S23426242	24825539	A	G	0.135838	0.00463886	LDLRAD4	intron_variant
1	BICF2S22962515	47369112	A	C	0.349711	0.00465217	SNX9	intron_variant
27	BICF2P378440	3730837	G	A	0.385507	0.00465255	TFCP2	intron_variant
9	BICF2G630472626	55454248	G	A	0.258671	0.00467083	ENSCAFG00000030758	downstream_gene_variant
5	BICF2P885328	58084565	A	G	0.405347	0.00468364	MEGF6	intron_variant
3	BICF2S23238701	10091291	A	C	0.442899	0.00468887	FAM174A-ENSCAFG00000007622	intergenic_region
20	BICF2P102867	30018550	A	G	0.371925	0.00469399	ENSCAFG00000007791-U6	intergenic_region
24	BICF2G630507722	16780141	G	A	0.385116	0.00469471	RASSF2	downstream_gene_variant
18	G1003f33S61	6976604	G	A	0.0809249	0.00469773	HECW1	intron_variant
32	BICF2P604588	29433665	G	A	0.111272	0.00471426	RPL31-ENSCAFG00000024694	intergenic_region
1	BICF2S23212492	47366439	G	A	0.348988	0.00471585	SNX9	intron_variant
7	BICF2P1088803	20833557	G	A	0.41185	0.00472762	FAM20B-RALGPS2	intergenic_region
22	BICF2G630318962	16082164	A	G	0.399421	0.00472875	DIAPH3	upstream_gene_variant
12	BICF2P435952	28773800	A	G	0.297688	0.00473476	ENSCAFG00000023580-SNORA62	intergenic_region
9	BICF2S23528651	53694665	G	A	0.065123	0.00474266	NCS1-GPR107	intergenic_region
21	BICF2G630648843	29578946	A	G	0.190751	0.0047464	CNGA4	intron_variant
10	BICF2P895418	52855982	A	G	0.375	0.00474949	ENSCAFG00000002716-U6	intergenic_region
23	BICF2S23322214	41585214	G	A	0.143064	0.0047548	PLSCR4-ENSCAFG00000030484	intergenic_region
31	BICF2P1306435	39254097	G	A	0.050578	0.00477453	PCBP3	missense_variant
16	BICF2P1079773	34278788	A	G	0.221821	0.00478088	ENSCAFG00000006566-ENSCAFG00000006574	intergenic_region
7	BICF2G630556106	33685135	G	A	0.236994	0.00480271	PLD5	intron_variant
4	BICF2G63057670	7844211	G	A	0.296243	0.00481618	DISC1-ENSCAFG00000030982	intergenic_region
1	BICF2P626276	35081504	G	A	0.249277	0.00481878	FUCA2-ENSCAFG00000032743	intergenic_region
1	BICF2P360757	92764833	A	G	0.481214	0.00481939	GLIS3-SLC1A1	intergenic_region
3	BICF2S2398896	31735251	A	G	0.058526	0.00482069	HERC2	intron_variant
35	BICF2G630777593	23405924	G	A	0.162572	0.00483322	LRRC16A	intron_variant
1	BICF2G630790065	97351649	A	G	0.427023	0.00483344	SPIN1	downstream_gene_variant
21	BICF2P1046920	42163497	T	A	0.177746	0.0048564	NAV2	intron_variant
21	TIGRP2P285177_rs9207203	42178852	A	G	0.177746	0.0048564	NAV2	3_prime_UTR_variant
28	BICF2S23739838	29786501	A	G	0.083815	0.0048572	TIAL1-BAG3	intergenic_region
1	BICF2P555035	64617175	G	A	0.223266	0.00485747	U6-HEY2	intergenic_region
1	BICF2P989675	64623878	A	G	0.223266	0.00485747	U6-HEY2	intergenic_region
19	BICF2P1079646	54718297	A	G	0.406792	0.00486873	0	0
14	BICF2P1362481	32079457	G	A	0.262283	0.00487447	ENSCAFG00000002452-ENSCAFG00000002455	intergenic_region
30	BICF2S2364778	29594174	A	C	0.237337	0.00489633	CILP-ENSCAFG00000009225	intergenic_region
37	BICF2G630134671	32241792	A	G	0.361994	0.00490054	0	0
18	BICF2P573088	25324934	T	A	0.183526	0.00492036	SEPT14-SCGB1C1	intergenic_region
27	BICF2P312924	33052444	A	C	0.156069	0.00492215	GRIN2B-EMP1	intergenic_region
9	G558f21S142	48808375	G	A	0.066474	0.00493085	LCN10	stop_gained&splice_region_variant
1	BICF2P481742	105113603	A	G	0.13078	0.0049564	ENSCAFG00000009712-ZNF350	intergenic_region
31	BICF2G630744136	41210120	G	A	0.325615	0.00495859	0	0
1	BICF2P1322137	94008473	G	A	0.192197	0.00497626	ERMP1-SPATA31E1	intergenic_region
13	BICF2P467680	46252100	A	G	0.3589	0.00498117	LNX1-CHIC2	intergenic_region
10	BICF2G630667138	16471769	A	C	0.390896	0.00498701	ENSCAFG00000026804-ENSCAFG00000000554	intergenic_region
24	TIGRP2P315671_rs8490004	29917639	A	G	0.0723589	0.00498977	CHD6-PTPRT	intergenic_region
3	BICF2G630347384	71323591	A	G	0.398698	0.00500548	JAKMIP1-UCHL1	intergenic_region
38	BICF2S22950339	8151611	A	C	0.142547	0.0050087	RGS18-BRINP3	intergenic_region
22	BICF2P875059	10051833	A	G	0.112717	0.00500897	OLFM4	upstream_gene_variant
24	BICF2P1250273	39202992	A	G	0.106368	0.00501602	TSHZ2	intron_variant
1	BICF2P798620	71802607	G	A	0.487717	0.00502107	C9orf3	intron_variant
9	TIGRP2P130516_rs8926411	54835079	C	A	0.0823699	0.00502622	TBC1D13	upstream_gene_variant
25	BICF2G630466089	18642466	T	A	0.265602	0.00502787	RNF17	intron_variant
34	BICF2P1131767	21966525	G	A	0.406792	0.00503548	TP63	intron_variant
9	BICF2G630839587	42937781	A	C	0.380058	0.0050465	FAM222B	downstream_gene_variant
30	BICF2G630409800	12322029	A	G	0.392185	0.00505254	SQRDL-7SK	intergenic_region
24	BICF2P826275	28019001	A	G	0.091763	0.00505321	DHX35-MAFB	intergenic_region
34	BICF2P49658	32873172	A	G	0.119942	0.0050661	GOLIM4	intron_variant
9	BICF2G630835127	35329054	A	C	0.0606936	0.00507469	BCAS3	intron_variant
27	BICF2S23133262	25426849	G	A	0.378437	0.00508073	KCNJ8-LDHB	intergenic_region
37	BICF2P1203931	17625237	A	G	0.0947902	0.00508504	MAP2-UNC80	intergenic_region
1	BICF2G630793037	82596338	A	G	0.0934783	0.00510002	PCSK5-OSTF1	intergenic_region
10	BICF2S22928326	15783294	G	A	0.187139	0.00510525	KCNC2	intron_variant
24	BICF2G630509899	14191665	A	G	0.486272	0.00510738	TMX4-HAO1	intergenic_region
17	BICF2P1073504	57688984	G	A	0.388006	0.0051107	FMO5	intron_variant
10	BICF2P1383491	25657039	G	C	0.332127	0.00511756	TAB1	intron_variant
10	BICF2P1221052	25673093	C	A	0.332127	0.00511756	TAB1-SYNGR1	intergenic_region
3	BICF2P648682	69127226	A	G	0.315029	0.00513132	ZNF518B	downstream_gene_variant
28	BICF2S23538313	42960623	G	A	0.480463	0.00513895	0	0
11	BICF2P1069611	64364460	G	A	0.117775	0.00515055	FRRS1L	intron_variant
3	BICF2G630355588	88800079	A	G	0.0498555	0.00518769	KCNIP4	intron_variant
9	TIGRP2P125376_rs8924630	32118564	C	G	0.341763	0.00519002	AKAP1-ENSCAFG00000029375	intergenic_region
7	TIGRP2P99218_rs9007376	55129260	G	A	0.220376	0.00521455	DTNA	intron_variant
28	G1355f49S150	9851792	G	A	0.319103	0.00522949	TLL2	upstream_gene_variant
31	TIGRP2P376221_rs9053384	26453725	A	C	0.470333	0.00523016	TIAM1-U6	intergenic_region
3	BICF2P221716	71475304	G	A	0.193922	0.00523357	ENSCAFG00000007718-APBB2	intergenic_region
21	BICF2S23059586	37957586	G	A	0.288295	0.00523366	INSC	intron_variant
20	TIGRP2P273525_rs8705404	27715862	G	A	0.253613	0.0052346	SYNPR	intron_variant
1	BICF2P1242811	117244599	A	G	0.367302	0.00523482	FFAR2-ENSCAFG00000007029	intergenic_region
26	BICF2P781031	8534645	G	A	0.277457	0.00524388	PPP1CC-CCDC63	intergenic_region
2	BICF2P1398268	52014744	G	A	0.436416	0.00524402	SREK1-ENSCAFG00000031780	intergenic_region
12	TIGRP2P160414_rs9063966	24577830	A	G	0.373555	0.00524756	PRIM2	intron_variant
4	BICF2S23251375	49817574	A	C	0.137283	0.00525278	GABRB2-ATP10B	intergenic_region
18	TIGRP2P245841_rs8951511	25416001	G	A	0.21026	0.0052532	B4GALNT4	intron_variant
19	BICF2G630253917	52397144	A	G	0.218931	0.00526441	ENSCAFG00000005653-ENSCAFG00000005658	intergenic_region
3	BICF2G630349419	76695044	G	A	0.222464	0.00527402	ENSCAFG00000024681-7SK	intergenic_region
20	BICF2P360101	61169016	G	A	0.390896	0.00527874	0	0
12	BICF2G630121100	60573289	G	A	0.307081	0.00528206	GRIK2-ENSCAFG00000028773	intergenic_region
33	BICF2S23632646	27918330	A	G	0.495665	0.00529211	ITGB5-MUC13	intergenic_region
34	BICF2G630453702	35006762	A	C	0.445007	0.00529327	SLC7A14	intron_variant
31	BICF2P485087	37735727	C	A	0.208576	0.00529695	RRP1	intron_variant
1	BICF2S23319158	65310856	A	G	0.213873	0.00531473	U6-ENSCAFG00000001064	intergenic_region
37	BICF2P736451	20180271	G	C	0.138728	0.00532214	ERBB4-IKZF2	intergenic_region
31	BICF2S23612746	38258252	A	C	0.100434	0.00532289	LRRC3	upstream_gene_variant
20	BICF2G630448214	53290439	G	C	0.340318	0.00532438	ENSCAFG00000023356-EMR4	intergenic_region
8	BICF2P533572	49915483	G	A	0.355491	0.00532489	IRF2BPL-ENSCAFG00000017161	intergenic_region
5	BICF2S23642432	14853533	G	A	0.24422	0.00533564	FOXR1	intron_variant
29	BICF2G630632471	36277625	G	A	0.104769	0.00534758	NECAB1	intron_variant
8	BICF2P991250	11136911	G	A	0.115607	0.00534966	ENSCAFG00000029524-ARHGAP5	intergenic_region
9	BICF2G630475002	60132468	G	A	0.324422	0.00535419	OR1L8-ENSCAFG00000020261	intergenic_region
4	BICF2P99667	19932546	A	G	0.148121	0.00536008	CCAR1	intron_variant
14	BICF2P930004	20137299	G	A	0.288295	0.00536216	PEG10	downstream_gene_variant
15	BICF2S22910375	66468536	G	A	0.190751	0.00537127	0	0
1	BICF2G630719010	36820244	G	A	0.465517	0.00537233	ENSCAFG00000000327-EPM2A	intergenic_region
7	BICF2G630553141	18689098	A	G	0.157514	0.00540008	IVNS1ABP-HMCN1	intergenic_region
5	BICF2S2332821	26765307	G	A	0.361994	0.00540454	GRIA4-CASP4	intergenic_region
30	BICF2G630411933	5369366	G	A	0.197254	0.0054089	TMCO5A-SPRED1	intergenic_region
5	BICF2P546213	26142906	A	C	0.493284	0.00540967	ENSCAFG00000001472-AASDHPPT	intergenic_region
8	BICF2S23118188	72150308	G	A	0.188584	0.00543273	ENSCAFG00000029088-C14orf180	intergenic_region
32	BICF2P667025	11312026	G	A	0.104197	0.00543303	IBSP-SPP1	intergenic_region
9	BICF2G630833921	33241848	G	A	0.305636	0.00543748	U3	upstream_gene_variant
34	BICF2G630454049	34694841	G	A	0.243497	0.0054545	PHC3	intron_variant
9	TIGRP2P244070_rs9203066	9372692	A	G	0.402457	0.00546767	CDC27-KANSL1	intergenic_region
35	TIGRP2P409614_rs8865546	26025555	A	G	0.127168	0.00546778	ENSCAFG00000024971-ENSCAFG00000012123	intergenic_region
29	BICF2G630630238	33927031	G	A	0.350434	0.00547141	MMP16	intron_variant
17	BICF2G630203246	51045509	A	G	0.474711	0.00547326	DYSF	intron_variant
37	BICF2S23041683	26881551	A	C	0.341339	0.00547888	SLC4A3-U6	intergenic_region
4	TIGRP2P59524_rs8862901	33109756	C	A	0.12211	0.00549503	CCSER2-GRID1	intergenic_region
11	BICF2G630301668	60082577	A	G	0.111994	0.00550386	5S_rRNA-SMC2	intergenic_region
12	TIGRP2P155195_rs9114432	3476536	G	A	0.473266	0.00550722	GRM4-HMGA1	intergenic_region
3	BICF2G630345649	69760998	G	A	0.250362	0.00551952	ZBTB49	downstream_gene_variant
4	BICF2S23752603	78594943	A	G	0.421243	0.00552615	U6-CDH9	intergenic_region
27	BICF2P985023	36683187	A	G	0.11922	0.005535	A2M	synonymous_variant
8	BICF2P436332	55968194	C	A	0.146832	0.00554793	U6-ENSCAFG00000017323	intergenic_region
32	BICF2P221548	5914895	A	C	0.479769	0.00555306	U4-ENSCAFG00000008931	intergenic_region
22	BICF2S23323434	25111440	G	A	0.190751	0.00555525	ENSCAFG00000004977-DACH1	intergenic_region
35	BICF2P982662	19715069	A	G	0.0809249	0.00557069	CDKAL1	intron_variant
1	TIGRP2P4962_rs9134723	61382157	G	A	0.429913	0.00558384	ENSCAFG00000000960-U6	intergenic_region
20	BICF2P365393	28389960	C	A	0.153401	0.00559644	CADPS	intron_variant
34	BICF2P1097564	16332853	A	G	0.477601	0.00560327	MCF2L2	intron_variant
3	BICF2P317973	67245773	A	G	0.265173	0.00561261	ENSCAFG00000015438-ENSCAFG00000025672	intergenic_region
21	BICF2S23057555	45664642	A	G	0.153179	0.00562151	UBE2D3-LUZP2	intergenic_region
21	BICF2P989983	45691340	G	A	0.153179	0.00562151	UBE2D3-LUZP2	intergenic_region
2	BICF2P1502076	33452705	T	A	0.0932081	0.00564229	ENSCAFG00000016282-ENSCAFG00000005516	intergenic_region
3	BICF2P886901	69288749	C	G	0.301301	0.00565641	ZNF518B-SLC2A9	intergenic_region
9	BICF2G630473198	55971811	A	G	0.342258	0.00565698	GARNL3	intron_variant
35	BICF2P411379	29142386	A	G	0.227206	0.00565873	0	0
1	BICF2P91741	117235573	A	T	0.368497	0.00566385	FFAR2-ENSCAFG00000007029	intergenic_region
32	BICF2G630600370	8181992	A	G	0.283237	0.00567422	U6-ENSCAFG00000009155	intergenic_region
9	BICF2G630475612	61184466	A	G	0.0621387	0.00569295	0	0
12	BICF2P869737	26475390	G	A	0.36922	0.00569621	ENSCAFG00000006053-LGSN	intergenic_region
17	BICF2G630205680	47981175	A	G	0.219653	0.00570802	EVA1A-ENSCAFG00000026547	intergenic_region
39	BICF2G630540117	2906358	G	A	0.229046	0.00571955	0	0
3	BICF2G630339800	43150128	A	G	0.377168	0.00572203	ARRDC4-U6	intergenic_region
13	TIGRP2P182473_rs9126511	58734198	A	G	0.127721	0.00572777	TMPRSS11E	intron_variant
6	BICF2S2349473	22931534	A	G	0.49422	0.00573203	HS3ST2-OTOA	intergenic_region
31	BICF2P403553	28808342	A	G	0.342258	0.00573534	ENSCAFG00000031162	missense_variant
30	BICF2S2452936	28535872	G	A	0.187861	0.00573659	ENSCAFG00000017032	downstream_gene_variant
20	BICF2P82245	36548262	A	C	0.447977	0.00573779	CACNA1D-DCP1A	intergenic_region
22	BICF2G630333730	49191385	A	G	0.437861	0.00574587	DOCK9-UBAC2	intergenic_region
28	BICF2P758863	19789842	A	T	0.206647	0.00575526	SORCS1-U4	intergenic_region
33	BICF2S23110356	7011750	A	G	0.316474	0.00576377	TOMM70A	upstream_gene_variant
37	BICF2P793514	17403884	A	T	0.395954	0.00576941	ENSCAFG00000028926-MAP2	intergenic_region
24	BICF2G630502916	22417650	A	G	0.136561	0.00577747	BPIFA2	intron_variant
25	BICF2P601865	43076968	C	A	0.411127	0.00578157	PSMD1	intron_variant
6	BICF2G630580164	49429543	A	G	0.376812	0.00578322	VCAM1-GPR88	intergenic_region
32	BICF2P1328248	29422296	A	C	0.114884	0.00579843	RPL31-ENSCAFG00000024694	intergenic_region
34	BICF2G630461555	22633636	A	C	0.0946154	0.00581567	IL1RAP-GMNC	intergenic_region
13	BICF2G630619420	31579792	A	G	0.252168	0.00581822	KHDRBS3-SNORA32	intergenic_region
1	BICF2G630719454	37363764	A	G	0.217077	0.00582347	GRM1	intron_variant
17	BICF2G630205509	48105009	A	G	0.0794798	0.00582691	TACR1	intron_variant
27	BICF2G630141336	14438472	G	A	0.237717	0.00582944	ENSCAFG00000028784-CPNE8	intergenic_region
22	BICF2P711568	45454216	C	A	0.430636	0.00583319	GPR180-ENSCAFG00000028798	intergenic_region
30	BICF2P431530	31447878	G	A	0.0982659	0.00583841	IQCH	intron_variant
7	BICF2S22957026	28159712	G	A	0.394356	0.00583868	PRRX1-GORAB	intergenic_region
24	BICF2S23414107	13547482	A	G	0.349711	0.00584625	PLCB1	intron_variant
28	BICF2P832669	27466449	A	G	0.262283	0.00584808	KIAA1598	intron_variant
29	BICF2P1469394	8983190	G	A	0.286127	0.00585308	ENSCAFG00000001121-FAM110B	intergenic_region
18	BICF2P987362	53376883	A	C	0.320809	0.00585758	ENSCAFG00000015082	intron_variant
38	TIGRP2P424365_rs8876213	17162163	G	A	0.0874277	0.00586696	ENSCAFG00000013502-FAM78B	intergenic_region
37	BICF2G630131085	28606164	A	G	0.339595	0.0058756	SGPP2	intron_variant
6	BICF2G630570756	79178284	A	C	0.473188	0.00588653	0	0
13	BICF2P307920	44264038	A	G	0.074422	0.00590627	SLAIN2-SLC10A4	intergenic_region
21	BICF2P565033	48316436	A	G	0.104769	0.00590981	BDNF-U6	intergenic_region
20	BICF2P1068569	40578303	G	A	0.249277	0.00591186	PFKFB4	intron_variant
20	BICF2P1068579	40579179	A	G	0.249277	0.00591186	PFKFB4	intron_variant
31	BICF2S22915950	4765970	A	G	0.147826	0.00591361	ENSCAFG00000031268-GBE1	intergenic_region
13	BICF2P332174	51139391	A	G	0.494942	0.00591892	ENSCAFG00000002337-U6	intergenic_region
13	BICF2P752873	51168953	G	A	0.494942	0.00591892	ENSCAFG00000002337-U6	intergenic_region
5	BICF2P1252369	10939048	G	A	0.162572	0.00592382	GRAMD1B	upstream_gene_variant
21	BICF2G630645083	31162281	G	A	0.364884	0.00592951	OLFML1	3_prime_UTR_variant
9	BICF2P311912	57248497	A	G	0.145231	0.00594031	PBX3	intron_variant
1	BICF2P173974	51692647	G	A	0.280347	0.00595983	ENSCAFG00000000770	intron_variant
18	BICF2P60770	25338475	A	G	0.194364	0.00596576	SEPT14-SCGB1C1	intergenic_region
25	BICF2P1120574	43658849	C	A	0.0563584	0.00598159	COPS7B	intron_variant
33	BICF2S23443409	6992547	G	A	0.317197	0.0059869	TOMM70A	intron_variant
37	BICF2P519746	32522381	G	A	0.231214	0.0059955	0	0
6	BICF2P1277678	22946613	G	A	0.398121	0.0060036	HS3ST2-OTOA	intergenic_region
26	BICF2P885464	13020852	A	C	0.479046	0.00600421	MED13L	intron_variant
20	BICF2P1244884	53273760	C	A	0.338873	0.00600917	ENSCAFG00000023356	intron_variant
14	BICF2S23030953	55473926	C	A	0.415462	0.00602917	CAV1	intron_variant
12	BICF2P1368233	23547966	G	A	0.138929	0.00603662	COL21A1-U6	intergenic_region
4	BICF2G630181672	90863212	A	G	0.488423	0.00603972	0	0
3	TIGRP2P51100_rs9163137	72945605	G	A	0.411127	0.00604395	UGDH	intron_variant
12	BICF2P486310	58906746	A	G	0.315751	0.00605276	ASCC3	intron_variant
7	BICF2P563716	25069765	G	A	0.474674	0.00605865	ENSCAFG00000025140	intron_variant
5	BICF2P557573	87843405	G	A	0.103324	0.0060643	CDH8-ENSCAFG00000028545	intergenic_region
2	BICF2S22948316	20346535	G	A	0.33237	0.00606889	PTER	intron_variant
8	BICF2S23411709	67524287	A	G	0.363439	0.00607159	U6-BCL11B	intergenic_region
35	BICF2P42970	28318287	A	G	0.397399	0.00608771	0	0
37	BICF2P765633	31093117	A	G	0.280029	0.00609353	0	0
9	BICF2P223161	60684987	G	A	0.21026	0.00609685	TTLL11	intron_variant
3	BICF2G630340121	44592607	A	C	0.444364	0.00610361	NR2F2-ENSCAFG00000026734	intergenic_region
22	BICF2G630327767	35622125	C	A	0.242775	0.00611728	ENSCAFG00000005271-ENSCAFG00000005282	intergenic_region
27	BICF2P183117	4326687	G	A	0.312139	0.00611831	LARP4	upstream_gene_variant
8	BICF2P70454	20249176	A	C	0.223988	0.00613923	LRFN5-U6	intergenic_region
9	BICF2G630473973	58472551	A	G	0.397399	0.00614398	SF1	intron_variant
21	TIGRP2P286445_rs8535156	45675185	A	G	0.152677	0.00614489	UBE2D3-LUZP2	intergenic_region
5	BICF2S23412053	21238306	G	A	0.183526	0.00615867	ALG9	intron_variant
8	BICF2P1084483	54764133	G	A	0.351156	0.0061646	5S_rRNA-5S_rRNA	intergenic_region
27	BICF2P11092	36066280	C	A	0.0982659	0.00618523	ENSCAFG00000029262	intron_variant
5	BICF2P103106	61242034	G	A	0.155347	0.00618818	CAMTA1	intron_variant
5	BICF2P274245	89373546	A	G	0.282514	0.00619207	0	0
19	BICF2P333246	11281426	G	A	0.0610465	0.00619408	U6-C4orf33	intergenic_region
19	BICF2S2304227	41733351	C	A	0.411127	0.00620385	NXPH2-LRP1B	intergenic_region
19	BICF2S23013498	41758956	C	A	0.411127	0.00620385	NXPH2-LRP1B	intergenic_region
9	BICF2P1023032	61956409	G	A	0.212428	0.00620661	0	0
18	BICF2S23750902	37460953	A	G	0.127168	0.00621072	ENSCAFG00000031389-ENSCAFG00000015225	intergenic_region
1	BICF2S231249	84173124	A	G	0.283647	0.00623214	U6-ENSCAFG00000001776	intergenic_region
36	BICF2G630760075	22626357	A	G	0.0686416	0.00623667	CCDC141	upstream_gene_variant
10	BICF2P509550	62526738	G	A	0.276012	0.00624523	EHBP1	intron_variant
9	BICF2G630474680	59805567	C	A	0.214595	0.00624675	RABGAP1	intron_variant
21	BICF2P1101497	45678842	A	C	0.155572	0.00624965	UBE2D3-LUZP2	intergenic_region
26	BICF2P1460298	6762332	A	T	0.1623	0.00625658	ENSCAFG00000007830-KNTC1	intergenic_region
22	BICF2G630332038	41871801	A	G	0.111272	0.00626183	ENSCAFG00000005303-U6	intergenic_region
37	BICF2S23138579	27982734	A	G	0.0729769	0.00626282	EPHA4-PAX3	intergenic_region
37	BICF2G630131441	29245090	A	G	0.126445	0.0062965	KCNE4-SCG2	intergenic_region
34	BICF2S23220895	25384667	C	A	0.174133	0.00630418	IQCJ	intron_variant
4	BICF2P963986	43112283	A	C	0.278179	0.00633483	SLIT3-PANK3	intergenic_region
28	BICF2S23023237	8386126	A	C	0.473988	0.00633539	PLCE1	intron_variant
7	BICF2P464381	32744200	A	G	0.479046	0.00633716	RGS7-FH	intergenic_region
10	BICF2G630480862	29610414	A	G	0.317197	0.0063484	ISX-7SK	intergenic_region
30	BICF2P295156	20050399	G	A	0.273844	0.00636989	UNC13C	intron_variant
1	BICF2P1081006	101629809	A	G	0.157019	0.00637338	ZNF667-GALP	intergenic_region
21	BICF2G630640685	50346992	T	A	0.273844	0.00639116	GIF	intron_variant
3	BICF2G630705409	32342708	A	G	0.427023	0.0063925	TUBGCP5	upstream_gene_variant
9	BICF2P503466	55682005	A	G	0.446532	0.00641067	PTRH1	downstream_gene_variant
31	BICF2P672619	26473671	T	A	0.0680174	0.00643529	TIAM1-U6	intergenic_region
2	BICF2P1400846	36370104	G	A	0.279624	0.00644375	ENSCAFG00000032089	non_coding_transcript_exon_variant
17	BICF2G630217561	17721879	A	C	0.264451	0.00644651	TDRD15-KLHL29	intergenic_region
22	BICF2P731727	45118978	A	C	0.463873	0.00645805	ENSCAFG00000005319-ENSCAFG00000030307	intergenic_region
27	BICF2P1455705	12258875	G	A	0.296965	0.00646753	PDZRN4	intron_variant
13	BICF2G630617177	28033662	G	C	0.203757	0.00646852	ADCY8-LDHB	intergenic_region
17	BICF2G630204829	48904479	A	T	0.27424	0.00647029	ENSCAFG00000008716-MOB1A	intergenic_region
19	BICF2P680364	45238946	A	C	0.156792	0.00649009	ARHGAP15	intron_variant
12	BICF2S23420111	43588491	A	G	0.245665	0.00649037	DOPEY1	downstream_gene_variant
11	BICF2S23346186	37128421	A	G	0.498555	0.00649598	ENSCAFG00000032537-CNTLN	intergenic_region
5	BICF2S23036030	11082019	A	G	0.12789	0.00649791	ENSCAFG00000028455-CLMP	intergenic_region
11	BICF2S22918349	33328562	A	C	0.337139	0.00651646	TYRP1	intron_variant
25	BICF2S23232897	41773341	A	G	0.294075	0.00652704	DNER	intron_variant
36	BICF2P549374	15483990	G	A	0.388728	0.00653577	GORASP2	intron_variant
15	TIGRP2P196415_rs8995196	19120040	A	C	0.171491	0.00653734	ENSCAFG00000005683-PHLDA1	intergenic_region
30	BICF2P768981	16844439	T	A	0.0628613	0.00655106	TNFAIP8L3-CYP19A1	intergenic_region
37	BICF2P975486	24708493	A	G	0.26462	0.00655725	TNS1-ENSCAFG00000026569	intergenic_region
23	BICF2P1328813	12730636	G	A	0.0895954	0.00656453	OSBPL10	intron_variant
22	BICF2G630327648	35371646	G	A	0.134393	0.00656565	ENSCAFG00000005271-ENSCAFG00000005282	intergenic_region
30	BICF2G630401652	29015321	A	G	0.134393	0.0065731	ZNF609	intron_variant
33	BICF2P126830	6981674	G	C	0.324891	0.00657768	TOMM70A	intron_variant
1	BICF2G630791956	85525940	G	A	0.375364	0.00659227	GDA	intron_variant
9	BICF2P450113	54825215	G	C	0.210564	0.00659402	TBC1D13	intron_variant
1	BICF2P1266152	58441221	A	G	0.369754	0.0066502	SLC35F1-CEP85L	intergenic_region
4	BICF2P498236	29324249	A	T	0.301449	0.00665753	TMEM254	upstream_gene_variant
30	BICF2S23332607	29608992	A	G	0.197977	0.00666097	ENSCAFG00000009225	downstream_gene_variant
25	BICF2S23014867	32012150	G	A	0.278179	0.00667386	KCTD9	intron_variant
3	BICF2P1350589	14980066	A	G	0.120665	0.00667492	KIAA0825	intron_variant
15	BICF2S23351757	35246319	G	A	0.168353	0.0066848	cfa-mir-331-METAP2	intergenic_region
1	TIGRP2P10591_rs9064527	84160221	A	G	0.294032	0.00668975	U6	upstream_gene_variant
11	BICF2P276238	72945483	A	C	0.104046	0.00669132	BRINP1-RPL7	intergenic_region
37	TIGRP2P420480_rs9021933	24819957	A	G	0.432511	0.00669764	RUFY4	downstream_gene_variant
17	BICF2P582375	33746750	A	G	0.404624	0.00671285	PKDCC-EML4	intergenic_region
24	BICF2G630508389	16068454	T	A	0.419075	0.00671391	C20orf196-GPCPD1	intergenic_region
34	BICF2G630449604	40963695	A	G	0.209538	0.00672788	TBL1XR1-ENSCAFG00000026532	intergenic_region
38	BICF2S23217357	5435952	G	A	0.104046	0.00673112	Y_RNA-HRPT2	intergenic_region
5	BICF2G63033621	30766517	A	G	0.409682	0.00673147	PITPNM3	intron_variant
11	BICF2S236655	74057155	A	G	0.0599711	0.00673812	C5-CNTRL	intergenic_region
15	BICF2G630429713	48238687	G	A	0.272069	0.00674144	DCLK2	intron_variant
12	BICF2P337717	23535318	C	A	0.139451	0.0067638	COL21A1-U6	intergenic_region
12	BICF2P188852	59353241	G	A	0.197977	0.0067669	ACA64-GRIK2	intergenic_region
26	BICF2G630802036	20206698	G	A	0.413295	0.00677303	TPST2	intron_variant
17	TIGRP2P232625_rs9030171	47037572	A	G	0.229046	0.00678231	LRRTM4-7SK	intergenic_region
1	BICF2S23223100	35035028	A	G	0.0816474	0.00678961	FUCA2	intron_variant
34	BICF2P1438800	4124182	A	G	0.0809249	0.00679167	FAM173B-7SK	intergenic_region
34	BICF2P1441305	4131355	A	G	0.0809249	0.00679167	FAM173B-7SK	intergenic_region
9	BICF2G630835777	37072140	G	A	0.17052	0.0067976	ACACA	intron_variant
7	BICF2P1450309	13647927	C	G	0.204052	0.00680649	CEP350	intron_variant
17	BICF2G630218603	16058556	A	G	0.278179	0.0068131	TDRD15-KLHL29	intergenic_region
3	BICF2S23727801	33307583	C	A	0.143064	0.00681666	ENSCAFG00000009927-ENSCAFG00000009932	intergenic_region
1	BICF2P276557	88560491	A	G	0.192197	0.00681955	PIP5K1B-FAM122A	intergenic_region
11	BICF2S23538318	70950276	A	G	0.315751	0.00682291	ASTN2	intron_variant
32	BICF2P678955	10818704	A	G	0.0609579	0.00690509	SPARCL1	downstream_gene_variant
29	BICF2G630625756	27717582	G	A	0.308526	0.00690666	ENSCAFG00000032349-ZBTB10	intergenic_region
5	BICF2P586593	53344207	G	C	0.319364	0.00690723	PPAP2B-USP24	intergenic_region
34	BICF2P169443	3961650	G	A	0.101156	0.00690957	MARCH6-CMBL	intergenic_region
35	BICF2G630770439	8678725	T	A	0.0614162	0.00691903	ENSCAFG00000009627-ENSCAFG00000009631	intergenic_region
15	BICF2P432853	56168030	A	G	0.165702	0.00694032	C4orf45-RAPGEF2	intergenic_region
5	BICF2P127170	16440753	A	G	0.332851	0.00695234	PAFAH1B2	intron_variant
9	BICF2G630472772	55597190	G	A	0.237717	0.00695283	FPGS	intron_variant
22	BICF2S23046527	62152721	G	A	0.114884	0.00695721	0	0
23	BICF2G630363208	53538809	A	G	0.0751445	0.00696234	0	0
11	BICF2P1226185	43854063	A	G	0.145954	0.00696434	ENSCAFG00000007543-U6	intergenic_region
29	BICF2P44988	15674170	A	T	0.4233	0.00696634	PDE7A-DNAJC5B	intergenic_region
4	BICF2P909440	24886087	G	A	0.471098	0.00697273	ADK	intron_variant
33	BICF2P1107743	11262985	A	G	0.320809	0.00697771	CBLB	intron_variant
7	BICF2P424666	24186987	G	A	0.38078	0.00697786	TNR-KIAA0040	intergenic_region
1	BICF2P387293	93984526	A	G	0.392341	0.00698432	ERMP1-SPATA31E1	intergenic_region
8	BICF2P1399694	64264674	A	G	0.278179	0.00698804	CLMN-SYNE3	intergenic_region
1	BICF2P1183670	77377720	A	G	0.276734	0.00699533	ENSCAFG00000030287	downstream_gene_variant
20	BICF2S2331706	33383671	G	A	0.283237	0.00699856	ARHGEF3	intron_variant
21	BICF2P1455766	13745420	G	A	0.356214	0.00700335	SYTL2	intron_variant
6	TIGRP2P77604_rs8593295	11308719	G	A	0.099711	0.00700633	ENSCAFG00000015446	intron_variant
12	BICF2P145577	24617913	A	G	0.444364	0.0070147	PRIM2	intron_variant
9	BICF2S23354403	3210246	A	G	0.418353	0.00702684	ENSCAFG00000030116-SEPT9	intergenic_region
26	BICF2P57323	8526984	C	A	0.245665	0.00704575	PPP1CC-CCDC63	intergenic_region
4	BICF2P1022755	43115162	A	G	0.277457	0.00705022	SLIT3-PANK3	intergenic_region
21	BICF2G630640647	50361609	A	G	0.348988	0.00705404	TCN1	intron_variant
20	BICF2G630448285	53041197	G	A	0.190751	0.00705571	PRAM1	intron_variant
18	BICF2G630696696	40952324	G	C	0.260838	0.00707585	ENSCAFG00000029885-OR4C15	intergenic_region
3	BICF2G630706335	33592851	A	C	0.327312	0.00708124	ENSCAFG00000009974-GABRA5	intergenic_region
25	BICF2P815865	40989041	G	A	0.375	0.00709434	7SK	upstream_gene_variant
12	BICF2P738610	62982596	G	A	0.181358	0.00709509	PREP-SNORD112	intergenic_region
9	BICF2G630836496	38556854	G	A	0.392909	0.00715614	ENSCAFG00000030750-ENSCAFG00000018340	intergenic_region
19	BICF2P841902	53829716	G	A	0.287572	0.0071614	0	0
34	BICF2P972734	14243377	A	C	0.0782609	0.00716535	DNAJC19-ENSCAFG00000031115	intergenic_region
1	BICF2P807085	25130763	C	A	0.307803	0.0071666	MOXD1-ENSCAFG00000000183	intergenic_region
17	BICF2P1181417	48614530	A	G	0.328035	0.00717949	AUP1	synonymous_variant
14	BICF2G630521313	13905182	T	A	0.126445	0.00719218	RUNDC3B	intron_variant
17	BICF2G630203684	50498025	G	A	0.210983	0.00719236	EXOC6B	intron_variant
26	BICF2S23451309	25654097	A	C	0.219653	0.00719749	ENSCAFG00000030935	intron_variant
18	BICF2P415260	8046328	A	G	0.41185	0.00720429	GLI3	intron_variant
20	BICF2S23151039	31238029	G	A	0.334298	0.0072195	FHIT-U4	intergenic_region
26	BICF2G630799801	22218612	G	A	0.468931	0.0072277	ENSCAFG00000011954-ZNRF3	intergenic_region
24	BICF2G630506157	18751156	G	A	0.432803	0.00724405	TGM3	downstream_gene_variant
38	BICF2P272871	17064946	C	A	0.355491	0.00725887	ENSCAFG00000013502-FAM78B	intergenic_region
10	BICF2P1045624	63057561	A	G	0.463043	0.00727533	WDPCP	intron_variant
19	G1041f34S272	4451294	A	G	0.176301	0.00731894	SLC7A11-ENSCAFG00000003755	intergenic_region
19	BICF2S23522853	4495739	A	G	0.176301	0.00731894	SLC7A11-ENSCAFG00000003755	intergenic_region
13	BICF2G630604277	9876033	A	G	0.279624	0.00732124	NUDCD1	intron_variant
2	BICF2S23644479	74382174	G	A	0.209841	0.00733524	LDLRAP1-TMEM57	intergenic_region
9	BICF2G630472789	55640762	A	T	0.247832	0.00733637	SH2D3C	upstream_gene_variant
22	BICF2P1284163	10602943	G	A	0.0816474	0.00734223	U6-5S_rRNA	intergenic_region
4	BICF2S2363081	17565578	G	A	0.352601	0.00734793	CTNNA3	intron_variant
22	BICF2P781888	35873452	G	A	0.142341	0.00736929	ENSCAFG00000005271-ENSCAFG00000005282	intergenic_region
21	BICF2P1170197	12444104	A	C	0.132948	0.00738604	TMEM135	intron_variant
21	BICF2P282441	46378324	G	A	0.178468	0.00740025	ENSCAFG00000001197-U6	intergenic_region
13	BICF2G630748835	62270554	G	C	0.450653	0.00741274	AFM-RASSF6	intergenic_region
7	TIGRP2P93872_rs9240447	28109255	G	A	0.160405	0.0074145	PRRX1	intron_variant
3	BICF2G630347622	71487729	G	A	0.248915	0.00741594	ENSCAFG00000007718-APBB2	intergenic_region
17	BICF2G630205200	48551190	A	G	0.442197	0.00741827	M1AP	intron_variant
9	BICF2G630472698	55504171	G	C	0.0898021	0.00744467	ST6GALNAC4	5_prime_UTR_variant
33	BICF2P508255	14635376	A	G	0.205202	0.00746948	ENSCAFG00000010335-PVRL3	intergenic_region
24	BICF2G630498394	36109597	C	A	0.0529753	0.00747259	KCNB1	intron_variant
3	BICF2P1012045	48500539	C	G	0.312861	0.00747832	SLCO3A1-SV2B	intergenic_region
20	BICF2S23317599	9752207	A	G	0.116329	0.0074829	LMCD1-GRM7	intergenic_region
6	TIGRP2P77850_rs8992811	12101971	A	G	0.141618	0.00748928	RBAK	downstream_gene_variant
6	BICF2P605563	12102033	A	G	0.141618	0.00748928	RBAK	downstream_gene_variant
6	TIGRP2P77661_rs8793881	11600849	G	A	0.416185	0.00750297	CYTH3-FAM220A	intergenic_region
34	BICF2P750962	13348445	A	C	0.276734	0.0075127	PEX5L	intron_variant
5	BICF2P1046219	62358943	C	A	0.135838	0.00751702	CA6	intron_variant
3	BICF2G630356729	89827681	A	G	0.375723	0.00752206	RPL7A-ENSCAFG00000016642	intergenic_region
19	BICF2G63036980	13995428	A	G	0.265896	0.00753256	U6-ENSCAFG00000003946	intergenic_region
4	BICF2P317031	73314815	A	C	0.058526	0.00754079	AGXT2	intron_variant
5	BICF2S23641666	9120531	A	G	0.083815	0.00754823	PKNOX2	intron_variant
11	BICF2G630306359	65298007	G	A	0.0946532	0.00756887	TXNDC8-SVEP1	intergenic_region
2	BICF2P976674	48910030	A	G	0.333092	0.00757828	IPO11	intron_variant
15	BICF2G630430097	47771626	A	T	0.187861	0.00757832	ENSCAFG00000007842	intron_variant
1	BICF2P639109	44919052	A	G	0.302023	0.00758023	TIAM2	intron_variant
38	BICF2P500963	22080279	G	A	0.223266	0.00759268	ATP1A2	intron_variant
22	BICF2G630330875	40933216	G	A	0.0857558	0.00759914	U6-ENSCAFG00000005303	intergenic_region
22	BICF2G630327458	35053559	C	A	0.143786	0.00762593	ENSCAFG00000028934-ENSCAFG00000005268	intergenic_region
27	BICF2S23613735	11595718	A	C	0.346098	0.00764071	ZCRB1	intron_variant
19	TIGRP2P268190_rs9104148	46909187	A	G	0.327312	0.00764921	VIS1-U6	intergenic_region
35	BICF2P417385	27532089	T	A	0.33815	0.00764989	0	0
21	BICF2P477683	31406627	A	G	0.322254	0.0076524	OR5P2	upstream_gene_variant
13	BICF2P448775	61574487	G	A	0.161127	0.00765684	ENSCAFG00000002956-ENSCAFG00000002959	intergenic_region
18	BICF2G630692519	45059778	G	A	0.0823699	0.00767025	EXT2	intron_variant
18	BICF2G630692512	45075126	G	A	0.0823699	0.00767025	EXT2	intron_variant
20	BICF2G630448233	53247697	G	A	0.472504	0.00767247	ENSCAFG00000023356	intron_variant
9	BICF2P1190026	16565845	G	A	0.20767	0.00767627	KCNJ2-ENSCAFG00000032512	intergenic_region
11	BICF2P1343522	58347609	A	G	0.206946	0.00772511	GRIN3A	intron_variant
28	BICF2G630269027	24869962	G	A	0.414941	0.00772904	NHLRC2-ADRB1	intergenic_region
29	BICF2G630635590	41713471	A	G	0.315217	0.00773273	MTDH	intron_variant
1	BICF2S23415113	72900574	A	G	0.333092	0.0077433	DAPK1-GAS1	intergenic_region
3	BICF2P1333491	72370758	G	A	0.322254	0.00777854	N4BP2	intron_variant
21	BICF2P271105	45460123	G	A	0.12789	0.00777856	UBE2D3-LUZP2	intergenic_region
31	BICF2P1263028	39112613	G	A	0.490593	0.00778543	ENSCAFG00000029547	intron_variant
24	TIGRP2P311981_rs8601904	19071248	G	A	0.467486	0.00778996	PDYN-ENSCAFG00000025524	intergenic_region
30	BICF2G630409636	17642603	G	A	0.332851	0.0078217	LEO1	missense_variant
25	BICF2S23236847	39838845	G	A	0.0816474	0.00782469	RHBDD1	intron_variant
24	BICF2P714108	31467036	A	G	0.050578	0.00785635	GTSF1L-U4	intergenic_region
3	BICF2G630359611	91979851	G	A	0.290462	0.00786379	0	0
17	TIGRP2P232726_rs9066387	47282030	G	A	0.191474	0.00787471	7SK-ENSCAFG00000029634	intergenic_region
22	BICF2P917714	43697584	G	A	0.479046	0.00788177	U6-5S_rRNA	intergenic_region
9	BICF2G630835762	37055117	A	G	0.345588	0.00792525	ACACA	intron_variant
9	BICF2S23236317	58527653	G	C	0.290462	0.00793147	PSMB7	upstream_gene_variant
24	BICF2P1376683	50164988	A	G	0.427746	0.00795034	0	0
35	BICF2S2306637	13147875	A	C	0.137283	0.00795179	RANBP9	intron_variant
11	BICF2P302698	37483772	T	A	0.431884	0.00796278	CNTLN	downstream_gene_variant
34	BICF2P1306775	32948799	A	G	0.424133	0.00796499	GOLIM4-ENSCAFG00000014605	intergenic_region
4	BICF2P522607	29325342	A	G	0.178468	0.00797261	TMEM254	upstream_gene_variant
6	BICF2P716684	28889451	G	A	0.359827	0.00800383	cfa-mir-193b-MKL2	intergenic_region
7	BICF2P1172086	47196240	A	C	0.376445	0.00800932	ENSCAFG00000017678-SYT4	intergenic_region
21	BICF2G630642466	49105358	G	A	0.399566	0.00801043	U6-U6	intergenic_region
22	TIGRP2P293833_rs8790134	43638777	C	A	0.140173	0.0080333	U6-5S_rRNA	intergenic_region
9	BICF2G630838718	42345640	T	A	0.431618	0.00804776	ENSCAFG00000030679-NLK	intergenic_region
13	BICF2P230727	24858741	C	G	0.0484104	0.00810107	FAM84B-U6	intergenic_region
12	BICF2P1172621	15208275	G	A	0.47974	0.00810608	GPR110-ENSCAFG00000002078	intergenic_region
5	BICF2P1335186	47848554	C	G	0.149566	0.00810958	KANK4-ENSCAFG00000023278	intergenic_region
1	TIGRP2P10479_rs9007049	82189525	A	C	0.252533	0.00812135	PCSK5	intron_variant
6	BICF2S23652505	10762282	A	G	0.131503	0.00812276	TMEM130-NPTX2	intergenic_region
31	BICF2P282929	38673472	G	A	0.140173	0.00812926	FAM207A-ADARB1	intergenic_region
34	BICF2P1389172	14598659	G	A	0.0700867	0.0081376	ENSCAFG00000028317-SOX2OT_exon1	intergenic_region
26	BICF2P227304	25436480	A	G	0.37789	0.00814921	ENSCAFG00000024720	intron_variant
20	BICF2G630445500	58444331	A	G	0.169825	0.00815691	0	0
7	BICF2G630563258	63951073	C	A	0.234091	0.00816041	IMPACT	intron_variant
4	TIGRP2P58533_rs8773167	14404326	G	A	0.0628613	0.0081683	ZNF365-ADO	intergenic_region
16	TIGRP2P216484_rs8839220	44462321	A	G	0.0758671	0.00817194	F11	downstream_gene_variant
1	BICF2S2369384	65275897	A	G	0.486272	0.00817465	U6-ENSCAFG00000001064	intergenic_region
11	BICF2G630302993	61924979	G	A	0.455925	0.0081921	TMEM38B-ZNF462	intergenic_region
15	BICF2P187948	38531916	C	A	0.394509	0.00819709	ANKS1B	intron_variant
12	TIGRP2P170135_rs8771854	62968006	G	A	0.223266	0.00819843	PREP-SNORD112	intergenic_region
26	BICF2P998354	26210309	A	G	0.141618	0.0082122	ENSCAFG00000029467	intron_variant
1	G61f40S219	87963670	G	A	0.156069	0.00821699	APBA1	intron_variant
17	BICF2G630204800	48915353	A	G	0.340087	0.00824275	MOB1A	5_prime_UTR_variant
23	BICF2S2445389	41536499	G	A	0.0859827	0.00826799	PLSCR4-ENSCAFG00000030484	intergenic_region
1	BICF2P768251	48206725	C	G	0.0586107	0.00826831	EZR	intron_variant
5	BICF2S23412235	26195837	G	A	0.348266	0.00826847	AASDHPPT	upstream_gene_variant
20	BICF2S23254956	37794481	G	A	0.403902	0.00828089	IQCF1	upstream_gene_variant
11	BICF2G630295322	19791585	G	A	0.401734	0.00828225	ENSCAFG00000024183	intron_variant
31	BICF2P225511	26808573	A	G	0.0989884	0.00829465	HUNK	intron_variant
18	BICF2P156099	54981333	C	G	0.146676	0.00829954	SDHAF2	intron_variant
6	BICF2S23710167	37899164	G	A	0.066474	0.00830528	ENSCAFG00000019303-ENSCAFG00000032448	intergenic_region
37	BICF2P769377	25376314	G	C	0.111272	0.00831135	CYP27A1	intron_variant
6	BICF2P74125	15182037	G	A	0.0718433	0.00831561	MAD1L1	intron_variant
1	BICF2P344001	101948797	A	G	0.234443	0.00833735	NLRP13-ENSCAFG00000031113	intergenic_region
3	TIGRP2P56519_rs8959077	93226945	C	A	0.166185	0.00833974	0	0
30	BICF2P1344817	27970250	G	A	0.471098	0.00836149	CA12-USP3	intergenic_region
8	TIGRP2P115684_rs9110889	54162959	A	G	0.0635838	0.00836595	SEL1L-5S_rRNA	intergenic_region
5	BICF2S23216522	58089339	G	A	0.392341	0.00836627	MEGF6	intron_variant
23	BICF2G630389042	12563998	G	A	0.0939306	0.00836724	GPD1L	downstream_gene_variant
27	BICF2P815910	10696214	A	G	0.156792	0.00837606	ADAMTS20-PRICKLE1	intergenic_region
31	BICF2S23158068	17069175	G	A	0.472543	0.00838365	U6-NCAM2	intergenic_region
39	BICF2P637189	4582559	A	C	0.185694	0.0083887	0	0
3	BICF2P1416281	89309010	A	G	0.0549133	0.00840311	SLIT2	intron_variant
20	BICF2P1087227	31042460	C	A	0.289017	0.00841543	FHIT	intron_variant
5	BICF2P58417	34042443	A	G	0.122832	0.0084155	STX8	intron_variant
5	BICF2P849914	34053245	A	C	0.122832	0.0084155	STX8	intron_variant
3	BICF2P780704	29195208	A	G	0.0541908	0.00841787	WDR41	intron_variant
19	BICF2P233163	42512867	A	G	0.397399	0.00843526	LRP1B	intron_variant
7	BICF2G630553087	18633179	G	A	0.485549	0.00844473	IVNS1ABP-HMCN1	intergenic_region
30	BICF2G630402495	27991809	A	C	0.470972	0.00844522	CA12-USP3	intergenic_region
8	BICF2P205350	22646719	A	G	0.151012	0.00845391	MIS18BP1	intron_variant
7	BICF2P193820	29078227	A	G	0.174385	0.00845953	F5-SLC19A2	intergenic_region
22	BICF2S23314668	54002853	A	G	0.327062	0.00846066	ENSCAFG00000006015-5S_rRNA	intergenic_region
2	BICF2P980413	71839288	A	G	0.115607	0.00846162	GMEB1	intron_variant
9	BICF2P250176	49112809	G	C	0.0658466	0.0084652	CARD9	upstream_gene_variant
24	BICF2S2351998	32505614	G	A	0.300578	0.00847169	PI3	missense_variant
28	BICF2P1047858	16762269	A	G	0.0867187	0.00847529	CCDC147-SORCS3	intergenic_region
34	BICF2P180390	16034720	A	C	0.303184	0.00847643	MCCC1	intron_variant
30	BICF2S23021949	20035089	G	A	0.295994	0.00848234	UNC13C	intron_variant
2	TIGRP2P25130_rs9090568	57495385	A	G	0.411722	0.00848513	ENSCAFG00000023621-OR4K13	intergenic_region
6	BICF2G630583536	35610093	C	G	0.32948	0.00849444	RBFOX1-ENSCAFG00000019087	intergenic_region
1	BICF2S23729961	107579093	G	A	0.30781	0.00849985	IZUMO1	upstream_gene_variant
27	BICF2S22932832	23413849	G	A	0.0823699	0.00851013	U6-SOX5	intergenic_region
2	BICF2P1434352	48901008	A	G	0.348988	0.0085164	IPO11	intron_variant
34	BICF2P1222915	7762237	C	A	0.115607	0.00852875	U2-KIAA0947	intergenic_region
37	BICF2P1298523	17578767	C	A	0.339595	0.00855502	MAP2	intron_variant
13	BICF2G630617488	28728032	A	G	0.29552	0.00855566	HHLA1	intron_variant
34	TIGRP2P400886_rs9040498	42121867	A	G	0.0876812	0.0085598	7SK-CHR_END	intergenic_region
20	BICF2G630448124	53423249	A	G	0.256503	0.00856204	EMR1	intron_variant
16	BICF2G630814398	48786710	G	A	0.364884	0.00856764	7SK-SNORD22	intergenic_region
7	BICF2P119995	33359043	A	C	0.408237	0.00857058	BECN1-MAP1LC3C	intergenic_region
29	BICF2G630624014	24865543	G	A	0.465441	0.00857144	ZFHX4-PEX2	intergenic_region
28	BICF2S2415449	20928993	A	G	0.490607	0.00858376	U4-XPNPEP1	intergenic_region
37	BICF2S23312124	24930026	A	G	0.0860058	0.00859972	ARPC2	intron_variant
24	BICF2G630498580	35612004	A	C	0.0621387	0.00860069	PREX1-ARFGEF2	intergenic_region
24	TIGRP2P312452_rs8755290	21671060	A	C	0.083815	0.00860084	KIF3B	intron_variant
28	G1347f45S249	7016100	A	C	0.221821	0.00860164	KIF11	intron_variant
1	BICF2S23454979	62313987	A	G	0.480491	0.00860785	CLVS2-TRDN	intergenic_region
6	BICF2G630583645	35551424	G	A	0.366329	0.0086121	RBFOX1-ENSCAFG00000019087	intergenic_region
30	BICF2P712149	29655745	G	A	0.213873	0.00861546	PARP16-U5	intergenic_region
30	BICF2S23545082	29661308	A	T	0.213873	0.00861546	U5	non_coding_transcript_exon_variant
1	BICF2P1315565	79210638	A	G	0.466763	0.00862626	TLE4	intron_variant
3	BICF2G630704490	30799265	G	A	0.430636	0.00863056	POLK	intron_variant
6	BICF2P272179	28919275	A	G	0.468208	0.00863155	MKL2	intron_variant
6	BICF2P545493	28923498	G	A	0.468208	0.00863155	MKL2	intron_variant
6	BICF2P545494	28923516	A	G	0.468208	0.00863155	MKL2	intron_variant
6	BICF2P288170	28927711	A	G	0.468208	0.00863155	MKL2	intron_variant
20	BICF2P1418602	60118786	G	A	0.230101	0.00864506	0	0
28	BICF2G630267788	27203162	A	G	0.0534682	0.00864747	PNLIPRP2	intron_variant
13	BICF2G630603235	5452619	T	A	0.0493373	0.00865675	RIMS2	intron_variant
34	BICF2S2329618	26474448	C	A	0.100434	0.00865796	SMC4	intron_variant
20	BICF2P2342	25289204	A	G	0.458815	0.00866725	SNORA64-ENSCAFG00000030398	intergenic_region
1	BICF2P388805	71807720	A	G	0.492775	0.00866848	C9orf3	intron_variant
2	BICF2G630677088	10603100	A	G	0.183526	0.00867027	ENSCAFG00000004186	intron_variant
5	BICF2S22938380	8897619	G	A	0.354769	0.00868527	CHEK1	intron_variant
21	BICF2S23224465	14824865	A	G	0.46026	0.00868538	U6-DLG2	intergenic_region
21	BICF2S23050627	52471793	A	C	0.276012	0.00870058	0	0
14	BICF2S2352902	50853247	G	A	0.495665	0.00870612	7SK-LRRN3	intergenic_region
1	BICF2P777545	69549047	A	G	0.263006	0.00870717	AKAP7-ENSCAFG00000032104	intergenic_region
30	BICF2G630408750	19108627	G	A	0.182081	0.00870891	U6-WDR72	intergenic_region
12	TIGRP2P166905_rs8979476	54344054	G	A	0.313584	0.00871559	MANEA-ENSCAFG00000003417	intergenic_region
7	BICF2P1238124	23316815	A	G	0.385116	0.00872746	RFWD2	upstream_gene_variant
12	BICF2P1470129	58859051	A	G	0.303184	0.00873446	ASCC3	intron_variant
26	TIGRP2P346913_rs9082474	8607815	G	A	0.320087	0.00877084	CCDC63	intron_variant
14	BICF2G630525002	31749331	C	G	0.187861	0.00878081	AHR	intron_variant
34	TIGRP2P393694_rs9095078	12892076	A	G	0.240607	0.00880446	GNB4-ACTL6A	intergenic_region
5	BICF2P1243844	34067927	A	G	0.125	0.00880792	STX8	intron_variant
14	BICF2S2333582	13930871	G	A	0.0773121	0.00881016	SLC25A40	3_prime_UTR_variant
5	BICF2P1435673	12526871	A	G	0.0693642	0.00881238	SORL1	intron_variant
21	BICF2P954234	48307292	G	A	0.109262	0.00883165	BDNF-U6	intergenic_region
19	BICF2S22925501	45395647	G	A	0.319364	0.00884305	ARHGAP15	intron_variant
31	BICF2S23544498	33113150	G	A	0.0643064	0.00885032	KCNJ6-7SK	intergenic_region
1	BICF2P554817	73295625	G	A	0.297688	0.00886381	GAS1-ZCCHC6	intergenic_region
19	BICF2S23648665	53693452	A	G	0.205202	0.00886894	PRPF40A	intron_variant
17	BICF2G630218851	15836027	A	G	0.141618	0.00888769	C2orf43-APOB	intergenic_region
9	BICF2G630474587	59436185	G	A	0.109104	0.00889096	DENND1A-STRBP	intergenic_region
9	BICF2P83286	41139274	A	G	0.317919	0.00891117	COPRS-U6	intergenic_region
35	BICF2P799046	13149333	A	G	0.104769	0.00891405	RANBP9	intron_variant
4	BICF2S23046044	73466187	G	A	0.392341	0.00891753	RAI14	intron_variant
6	BICF2P327568	10779815	C	A	0.117775	0.00892566	TMEM130-NPTX2	intergenic_region
18	TIGRP2P248133_rs8765257	33515744	A	G	0.153179	0.00893733	ABTB2	intron_variant
22	BICF2P932190	10033969	A	G	0.102356	0.0089391	OLFM4	intron_variant
7	BICF2G630550437	10925658	G	A	0.378613	0.00894223	NSL1	intron_variant
21	BICF2G630648259	30061824	G	A	0.383671	0.0089706	ENSCAFG00000006595-ENSCAFG00000029683	intergenic_region
26	BICF2G630801834	20372619	A	G	0.270622	0.00899635	MIAT_exon5_3-ENSCAFG00000026840	intergenic_region
26	BICF2P878601	22265699	G	A	0.215318	0.0090113	ENSCAFG00000011954-ZNRF3	intergenic_region
23	TIGRP2P304137_rs8837946	31702554	A	G	0.104046	0.00901401	EPHB1	intron_variant
1	BICF2G630716932	33729841	A	G	0.402315	0.00903315	ENSCAFG00000000291-NMBR	intergenic_region
22	BICF2G63091970	62898290	G	A	0.44356	0.00904599	0	0
35	BICF2G630777116	22909448	G	A	0.147399	0.00904774	FAM65B-ENSCAFG00000031397	intergenic_region
13	BICF2G630746086	64676365	A	G	0.361272	0.00904999	0	0
24	BICF2S23519990	21679528	G	A	0.49711	0.009053	KIF3B	intron_variant
3	BICF2P152793	19586308	A	C	0.126923	0.00905702	7SK-U6	intergenic_region
17	BICF2P693010	66041605	A	G	0.15896	0.00906967	0	0
17	BICF2P584323	66073669	A	C	0.15896	0.00906967	0	0
17	BICF2P694092	66109883	A	G	0.15896	0.00906967	0	0
18	BICF2P857729	46544094	A	G	0.210983	0.0090746	KCNQ1	intron_variant
13	BICF2S2374162	58627957	A	G	0.0924855	0.00909606	TMPRSS11F-TMPRSS11B	intergenic_region
37	BICF2G630127022	11562061	A	G	0.348266	0.00910563	BMPR2-FAM117B	intergenic_region
4	BICF2P846134	28791325	C	A	0.275036	0.00910638	U6-ENSCAFG00000030222	intergenic_region
6	BICF2S23112733	28902499	A	G	0.467486	0.00910855	cfa-mir-193b-MKL2	intergenic_region
24	BICF2P754854	27366935	C	G	0.110709	0.00910894	DHX35	intron_variant
3	TIGRP2P55842_rs8846762	91037189	A	G	0.263728	0.0091093	ENSCAFG00000016664-ANAPC13	intergenic_region
2	BICF2P292015	57202637	A	G	0.346098	0.00911501	ENC1-HEXB	intergenic_region
7	TIGRP2P102693_rs9182580	74090635	A	G	0.158237	0.00912363	PTPRM	intron_variant
1	TIGRP2P6001_rs8942087	65095485	A	C	0.488439	0.00914427	TRMT11-CENPW	intergenic_region
10	BICF2G630485317	36455053	A	G	0.115607	0.00914443	U2-ENSCAFG00000002071	intergenic_region
5	BICF2P1289805	59239424	C	A	0.377372	0.00916422	AJAP1-NPHP4	intergenic_region
8	TIGRP2P115841_rs8992318	54954680	A	G	0.424855	0.00918701	5S_rRNA-U6	intergenic_region
13	BICF2P340069	51009700	C	G	0.49422	0.00919027	ENSCAFG00000002337-U6	intergenic_region
13	TIGRP2P179697_rs9095406	51014516	A	C	0.49422	0.00919027	ENSCAFG00000002337-U6	intergenic_region
20	TIGRP2P276538_rs9154188	8272630	G	A	0.177746	0.00919707	FANCD2	intron_variant
38	BICF2G63066077	26216261	A	G	0.176812	0.00919803	0	0
16	BICF2S22941731	46506295	A	G	0.374096	0.00919823	STOX2	intron_variant
25	BICF2P712612	41368191	A	G	0.161127	0.00920338	7SK-PID1	intergenic_region
9	BICF2S23349985	49171051	A	G	0.0657514	0.00921915	ENSCAFG00000019701	intron_variant
20	BICF2P98324	51699091	A	G	0.0867052	0.00925364	OR08F07	downstream_gene_variant
7	TIGRP2P104255_rs8789928	77890714	A	G	0.392185	0.00925674	SPIRE1	intron_variant
7	BICF2P61115	29055457	G	A	0.106936	0.00926384	F5	intron_variant
26	BICF2G630802019	20223645	C	G	0.393786	0.00927453	TPST2-CRYBB1	intergenic_region
22	TIGRP2P294490_rs8380857	45662973	A	G	0.226608	0.00928209	ENSCAFG00000028798-ABCC4	intergenic_region
21	BICF2S2319972	46145263	G	A	0.407514	0.00928574	SNORA9	downstream_gene_variant
26	BICF2S23621669	7016025	A	C	0.385116	0.00928798	CLIP1	intron_variant
35	BICF2P231420	18113993	A	G	0.074422	0.00929541	7SK-7SK	intergenic_region
13	BICF2G630619413	31567107	G	A	0.261628	0.00929899	KHDRBS3	intron_variant
28	BICF2P296763	16285854	G	A	0.0852601	0.00930212	SLK	upstream_gene_variant
22	BICF2G63090510	61518783	A	C	0.218931	0.00932107	0	0
7	BICF2P78442	23086676	G	A	0.132225	0.00933811	ENSCAFG00000014246	downstream_gene_variant
7	BICF2S23639812	28223839	G	C	0.41691	0.00933981	GORAB	intron_variant
35	BICF2S22931339	19660698	A	G	0.102601	0.00934512	CDKAL1	intron_variant
10	BICF2S23440743	22512341	G	A	0.0628613	0.0093456	TTLL1-PACSIN2	intergenic_region
22	TIGRP2P294727_rs9064521	46561552	A	C	0.156069	0.00936147	UGGT2	intron_variant
1	BICF2P470826	46797843	G	A	0.208815	0.00936788	ARID1B	missense_variant
26	BICF2P1190898	6989612	G	A	0.239162	0.00936898	ZCCHC8-CLIP1	intergenic_region
28	BICF2S2332115	16060255	A	C	0.0968208	0.00937665	SH3PXD2A	intron_variant
31	TIGRP2P375283_rs8776149	4729088	C	A	0.134393	0.00937753	ENSCAFG00000031268-GBE1	intergenic_region
12	TIGRP2P156929_rs8936205	12681765	A	G	0.5	0.0093798	TMEM151B	intron_variant
18	BICF2P529617	16601705	A	T	0.140173	0.00938725	RELN	intron_variant
26	BICF2S23117144	4877132	G	A	0.190029	0.00939137	BRI3BP	intron_variant
18	BICF2P922119	18812648	G	A	0.141618	0.00940369	MAGI2-GNAI1	intergenic_region
37	BICF2S23348935	17907623	A	G	0.462428	0.009408	KANSL1L	intron_variant
29	BICF2P213160	23525051	C	A	0.443478	0.00941303	U6-ENSCAFG00000031592	intergenic_region
37	BICF2G630128762	26300782	A	G	0.416667	0.00941604	SLC4A3-U6	intergenic_region
9	BICF2P1257515	36356781	G	A	0.228324	0.00942742	CA4-ENSCAFG00000024561	intergenic_region
9	BICF2P929417	36400807	G	A	0.228324	0.00942742	MYO19	missense_variant&splice_region_variant
2	BICF2P1058147	24010991	A	C	0.231936	0.00945165	CAMK1D	intron_variant
5	BICF2P1166755	58649092	G	A	0.290462	0.00948619	C1orf174-AJAP1	intergenic_region
11	BICF2G630301690	60105602	A	G	0.114162	0.00949613	SMC2	intron_variant
26	BICF2S23233559	34088380	A	G	0.42052	0.0095058	PCDH15	intron_variant
14	BICF2P483546	45155200	A	G	0.0932081	0.0095286	RP9	intron_variant
12	BICF2G630118420	64612796	G	A	0.175613	0.00953167	PDSS2	intron_variant
16	BICF2G630114527	35707438	A	G	0.227601	0.00953841	MFHAS1-ENSCAFG00000029727	intergenic_region
16	BICF2G630114528	35707455	A	C	0.227601	0.00953841	MFHAS1-ENSCAFG00000029727	intergenic_region
5	BICF2G630187745	47862493	C	A	0.350434	0.0095542	KANK4-ENSCAFG00000023278	intergenic_region
9	BICF2G630840389	44314279	A	G	0.125	0.00956396	BLMH	intron_variant
14	TIGRP2P186137_rs9046906	13881598	A	G	0.15896	0.00957842	RUNDC3B	missense_variant
18	BICF2P1159330	23587069	C	G	0.171965	0.00958883	SEMA3A	intron_variant
7	TIGRP2P104511_rs8639956	78763936	C	A	0.403179	0.00959824	MYO5B	intron_variant
5	BICF2S23412236	26195871	A	C	0.211705	0.00960044	AASDHPPT	upstream_gene_variant
9	BICF2P798834	48351258	A	G	0.109104	0.00960084	EXD3	intron_variant
23	BICF2G630363500	53102081	A	C	0.111994	0.00961238	0	0
22	BICF2G630327749	35487574	G	A	0.0953757	0.00962847	ENSCAFG00000005271-ENSCAFG00000005282	intergenic_region
9	BICF2G630834181	33552225	A	C	0.232272	0.00964169	PPM1E	intron_variant
35	BICF2P1316254	7642599	A	G	0.278179	0.00965563	SNRNP48-BMP6	intergenic_region
11	BICF2G630306371	65317800	C	G	0.259393	0.00966709	U6	upstream_gene_variant
4	BICF2P614182	74235196	G	A	0.16763	0.00966804	TARS	intron_variant
7	BICF2G630565078	65760114	A	G	0.322977	0.00967053	ENSCAFG00000018233-ENSCAFG00000018235	intergenic_region
22	BICF2G630326145	28950195	A	G	0.277858	0.00967147	ENSCAFG00000028446-U1	intergenic_region
13	TIGRP2P184336_rs8911893	62381072	A	G	0.0903179	0.00967979	RASSF6-IL8	intergenic_region
26	BICF2P618695	4873117	A	G	0.195809	0.0096813	BRI3BP	intron_variant
8	BICF2P400688	70740607	A	G	0.11288	0.00969368	TRAF3	intron_variant
9	BICF2P853239	38723347	G	A	0.0751445	0.00971121	TMEM132E-CCL1	intergenic_region
21	BICF2G630653835	17849945	A	C	0.465942	0.00971207	ENSCAFG00000004649-ENSCAFG00000030498	intergenic_region
30	BICF2P249868	6547983	A	G	0.148844	0.00972838	U6-U6	intergenic_region
5	BICF2P1122600	47532136	A	G	0.472504	0.00972963	DOCK7	intron_variant
3	BICF2S23447407	54142311	A	G	0.127168	0.00977103	ENSCAFG00000022842	downstream_gene_variant
11	TIGRP2P154704_rs9225621	76422928	A	G	0.430636	0.00979067	0	0
17	BICF2S23125101	19528256	G	A	0.40896	0.00979555	DNMT3A	intron_variant
2	TIGRP2P32837_rs9159936	83436647	A	G	0.101879	0.00980826	ENSCAFG00000016361-ENSCAFG00000024449	intergenic_region
30	BICF2G630403406	27169743	G	C	0.288406	0.00982449	ENSCAFG00000024545-TLN2	intergenic_region
1	BICF2S23319232	54119750	C	A	0.489884	0.00982577	ENSCAFG00000023764-T	intergenic_region
28	BICF2P1002411	5460237	A	G	0.201158	0.00984675	HTR7	intron_variant
5	BICF2P533881	63037190	A	G	0.151012	0.00986727	CLSTN1-CTNNBIP1	intergenic_region
29	BICF2G630631247	34949380	A	G	0.392341	0.00987221	U6-ENSCAFG00000008943	intergenic_region
9	BICF2S23657684	59300694	A	G	0.17052	0.00991416	DENND1A	intron_variant
4	BICF2G630170414	78443985	A	G	0.28974	0.00991546	U6-CDH9	intergenic_region
2	BICF2P840613	22533614	A	G	0.16474	0.00997575	ENSCAFG00000004716-FRMD4A	intergenic_region
13	BICF2P1153696	51033486	A	G	0.347323	0.0099794	ENSCAFG00000002337-U6	intergenic_region
7	BICF2G630550026	10373593	A	G	0.269509	0.00998452	DTL-PPP2R5A	intergenic_region
26	BICF2P914293	24218052	A	G	0.28396	0.00999146	LIMK2	intron_variant

## Sheet: LHR
Table S1. List of all SNPs (p < 0.01) associated with LHR that were used for gene set and pathway analysis
Chr	SNP	Position (bp)	A1	A2	Freq	p-value	Official gene name	Location
8	TIGRP2P119932_rs8658799	68874072	G	A	0.360996	7.88e-07	BEGAIN-DLK1	intergenic_region
28	BICF2G630268912	25034623	A	G	0.280913	8.78e-07	TDRD1	intron_variant
10	BICF2G630490347	56634077	A	G	0.388243	8.98e-07	EFEMP1	3_prime_UTR_variant
5	BICF2P491431	79708771	A	G	0.109959	1.2e-06	ZFHX3-PSMD7	intergenic_region
24	BICF2G630507820	16702908	A	C	0.0739972	4.09e-06	SLC23A2	intron_variant
7	BICF2G630551232	14187139	G	A	0.350622	1.54e-05	XPR1	intron_variant
14	BICF2S22914567	48038654	G	A	0.184647	2.46e-05	AOAH	intron_variant
22	BICF2G630330875	40933216	G	A	0.0917942	4.25e-05	U6-ENSCAFG00000005303	intergenic_region
29	BICF2G630622300	14318438	G	A	0.326418	4.37e-05	cfa-mir-124-2-ENSCAFG00000007228	intergenic_region
21	BICF2P1273067	17555616	G	A	0.421162	4.4e-05	7SK-ENSCAFG00000004649	intergenic_region
4	BICF2P162948	22799467	A	G	0.0816044	4.47e-05	ASCC1	intron_variant
4	BICF2P745841	22823048	A	G	0.0816044	4.47e-05	ASCC1	intron_variant
4	BICF2P772745	23221925	A	G	0.104426	4.54e-05	MICU1	intron_variant
24	BICF2G630506713	18067292	C	A	0.0594744	5.19e-05	SLC4A11	intron_variant
14	BICF2G630527866	40263538	A	G	0.30014	5.38e-05	HOXA1	downstream_gene_variant
13	BICF2G630617879	29992102	G	A	0.107192	5.5e-05	ENSCAFG00000029450-ZFAT	intergenic_region
13	BICF2S23029238	30004936	C	A	0.107192	5.5e-05	ENSCAFG00000029450-ZFAT	intergenic_region
13	BICF2G630617906	30042064	G	A	0.107192	5.5e-05	ENSCAFG00000029450-ZFAT	intergenic_region
13	BICF2G630617896	30034012	C	A	0.107341	5.7e-05	ENSCAFG00000029450-ZFAT	intergenic_region
13	BICF2G630616688	27351560	G	A	0.35408	6.55e-05	ASAP1	intron_variant
11	BICF2P514142	72407491	G	C	0.31875	6.57e-05	U6-BRINP1	intergenic_region
22	BICF2G630330855	40906861	A	G	0.0814763	6.78e-05	U6-ENSCAFG00000005303	intergenic_region
1	TIGRP2P9038_rs8982284	76458747	G	A	0.126556	6.86e-05	RASEF	intron_variant
30	BICF2P785888	15541731	A	G	0.0995851	8.27e-05	FAM227B	intron_variant
7	BICF2P411192	9437479	A	G	0.395429	8.43e-05	KCNH1	intron_variant
16	BICF2S23530905	60391793	A	G	0.27849	9.49e-05	0	0
28	BICF2P41924	40051509	A	G	0.117566	9.57e-05	BNIP3	upstream_gene_variant
34	BICF2G630457189	31452902	A	G	0.348338	0.000103986	BCHE-ENSCAFG00000014497	intergenic_region
13	BICF2S2343470	29972104	A	C	0.111496	0.000108186	ENSCAFG00000029450-ZFAT	intergenic_region
34	BICF2G630454765	33664974	A	G	0.391425	0.00011864	cfa-mir-551b-MECOM	intergenic_region
34	BICF2G630453211	35389538	A	G	0.179115	0.000126504	SLC2A2	intron_variant
13	BICF2G630616563	27152646	G	A	0.0747922	0.000127443	ASAP1	intron_variant
1	BICF2S231735	57384052	A	G	0.48892	0.000129816	RFX6-VGLL2	intergenic_region
22	BICF2P770526	47055762	G	A	0.290456	0.00013131	5S_rRNA-U6	intergenic_region
16	BICF2G630814220	48624317	A	G	0.334025	0.000134946	7SK-SNORD22	intergenic_region
24	TIGRP2P321778_rs8529259	48597419	A	G	0.0650069	0.000152846	0	0
18	BICF2P247671	49893654	A	G	0.206461	0.000164536	NDUFV1-GSTP1	intergenic_region
34	BICF2P335962	18718165	T	A	0.151452	0.000174221	TRA2B-ETV5	intergenic_region
24	BICF2P289088	17310292	A	G	0.0843707	0.000180886	SMOX-RNF24	intergenic_region
22	BICF2S23339817	30752909	A	G	0.385892	0.000219251	MYCBP2	intron_variant
13	BICF2G630617043	27831739	A	G	0.446058	0.000234833	ADCY8	intron_variant
33	BICF2P996326	9874935	A	G	0.0638889	0.000235687	ENSCAFG00000009706-ENSCAFG00000025525	intergenic_region
11	TIGRP2P150001_rs8940057	7223302	A	G	0.41759	0.000236425	SEMA6A-ENSCAFG00000000177	intergenic_region
33	TIGRP2P388008_rs9134195	20702128	G	A	0.0456432	0.000248003	ENSCAFG00000032624	upstream_gene_variant
29	TIGRP2P368403_rs8920613	8119520	A	C	0.215768	0.000251033	7SK-ENSCAFG00000007066	intergenic_region
8	BICF2G630416676	71634530	A	C	0.456989	0.000258126	RD3L-TDRD9	intergenic_region
14	BICF2G630528925	41985858	A	G	0.0615491	0.000262401	CREB5-ENSCAFG00000003014	intergenic_region
27	BICF2G630150066	27514588	A	G	0.0760719	0.000263664	ENSCAFG00000030449	3_prime_UTR_variant
12	BICF2P751233	11191876	A	G	0.0899032	0.000268326	UBR2	intron_variant
29	BICF2P719591	7263914	A	G	0.13278	0.000274309	TGS1	intron_variant
34	BICF2P268425	18510281	A	G	0.0885201	0.00027468	IGF2BP2	intron_variant
17	BICF2G630217494	17836975	A	G	0.433518	0.000292233	TDRD15-KLHL29	intergenic_region
20	BICF2P1260313	45800163	A	G	0.0753804	0.000294365	NWD1	intron_variant
12	TIGRP2P158601_rs8868474	19099339	G	A	0.223375	0.000306558	TFAP2B-PKHD1	intergenic_region
29	BICF2P1325427	10810356	G	A	0.337483	0.000307775	CA8-ENSCAFG00000012280	intergenic_region
25	BICF2P1424830	22700038	A	G	0.0609418	0.00031518	U6-ENSCAFG00000007798	intergenic_region
7	BICF2P551090	9444615	A	G	0.378285	0.00032136	KCNH1	intron_variant
14	BICF2P744360	52387787	A	C	0.418396	0.000324468	C7orf60	intron_variant
1	BICF2G630719512	37535877	G	A	0.367036	0.000324792	GRM1	intron_variant
34	BICF2P430758	15230146	A	G	0.126556	0.000327598	SOX2OT_exon4-SNORA72	intergenic_region
35	BICF2G630773227	12513507	G	A	0.215076	0.000332831	ENSCAFG00000009809	intron_variant
1	BICF2S22952840	37535634	A	G	0.367911	0.000337403	GRM1	intron_variant
29	BICF2P237366	7236801	C	A	0.077455	0.000337854	TMEM68	upstream_gene_variant
13	BICF2P851323	37998336	G	A	0.311203	0.000350853	ARHGAP39-COMMD5	intergenic_region
33	BICF2G630247974	11456465	G	A	0.0885201	0.000359233	CBLB	intron_variant
4	BICF2P618599	19003460	A	G	0.274262	0.000360803	ENSCAFG00000013277	intron_variant
12	BICF2P1435298	11910678	G	A	0.404564	0.000368055	ABCC10	missense_variant
35	BICF2S23323648	19421226	G	A	0.206086	0.000372259	CDKAL1	intron_variant
4	BICF2P613296	23324281	G	A	0.0503546	0.000373869	MCU	intron_variant
1	BICF2P578637	55500779	G	A	0.237898	0.00039891	MLLT4	intron_variant
10	BICF2P113421	64466685	A	G	0.105409	0.000405191	SERTAD2-SLC1A4	intergenic_region
16	BICF2G630109998	30695399	A	G	0.0739972	0.000406419	U6-DUSP26	intergenic_region
14	BICF2G630518500	6523965	G	A	0.381051	0.000416256	ENSCAFG00000032717	upstream_gene_variant
13	BICF2G630617864	29963871	A	T	0.196404	0.00041749	ENSCAFG00000029450-ZFAT	intergenic_region
34	BICF2S23049364	35089246	A	T	0.0671745	0.000423908	SLC7A14-U6	intergenic_region
21	BICF2P734231	18150772	G	A	0.292649	0.000425844	ENSCAFG00000004649-ENSCAFG00000030498	intergenic_region
16	BICF2S22952613	10796880	A	G	0.382434	0.000440535	CREB3L2	intron_variant
19	BICF2G630256325	49835857	G	A	0.443292	0.000447552	ORC4-ENSCAFG00000005529	intergenic_region
9	BICF2P1312098	22832737	G	A	0.0497925	0.000451749	STARD3	5_prime_UTR_premature_start_codon_gain_variant
12	BICF2P663537	25851397	A	G	0.418283	0.000455122	KHDRBS2	intron_variant
22	BICF2S22961553	40641702	A	G	0.147507	0.000458415	U1-5S_rRNA	intergenic_region
5	BICF2P792026	77501182	A	G	0.473029	0.000459617	PHLPP2	upstream_gene_variant
24	TIGRP2P311339_rs8765686	15084571	C	A	0.340249	0.00046043	HAO1-BMP2	intergenic_region
4	BICF2S23435937	23570768	A	G	0.171508	0.000466046	PLA2G12B-U6	intergenic_region
21	BICF2P653488	20567084	A	G	0.0546335	0.00046797	GAB2	intron_variant
7	BICF2P1294435	15753165	A	C	0.0636238	0.000492064	ENSCAFG00000032294	upstream_gene_variant
3	BICF2P401637	90675531	A	G	0.121191	0.000523285	ENSCAFG00000016642-ENSCAFG00000030802	intergenic_region
17	BICF2G630219617	14870356	G	A	0.469571	0.000526877	ENSCAFG00000031510-TTC32	intergenic_region
2	BICF2S23334268	26883152	A	G	0.0926694	0.000532177	U6-U6	intergenic_region
7	BICF2P1373005	14329645	C	G	0.353186	0.000538922	XPR1	intron_variant
28	BICF2G630264327	38152495	A	G	0.0533241	0.000540508	MKI67-MGMT	intergenic_region
5	BICF2S229500	87278670	A	G	0.285615	0.000546471	CDH8-ENSCAFG00000028545	intergenic_region
8	BICF2P1269765	68717926	G	A	0.0810249	0.000547167	WDR25	intron_variant
33	BICF2G63075223	33306703	A	T	0.0594744	0.000557151	0	0
17	BICF2G630209768	36897705	G	A	0.432227	0.000569059	SLC20A1-ENSCAFG00000007239	intergenic_region
12	BICF2P135995	11845213	G	A	0.335873	0.000571163	ZNF318	upstream_gene_variant
18	BICF2P1118188	49112646	G	A	0.378641	0.000582776	MTL5	intron_variant
29	BICF2P1061684	6489580	G	A	0.0747922	0.00058769	RP1-SNORD115	intergenic_region
14	BICF2G630517190	3848458	G	A	0.340486	0.000634167	EXOC4	intron_variant
36	BICF2G630759284	23565854	A	C	0.107192	0.000656721	CWC22-U6	intergenic_region
10	BICF2S22961647	23254590	A	G	0.217151	0.000658483	TCF20	downstream_gene_variant
4	BICF2S23242445	23141000	C	A	0.257953	0.000674402	MICU1	intron_variant
22	BICF2S23139718	40631745	A	G	0.134163	0.000674851	U1-5S_rRNA	intergenic_region
6	BICF2P624547	14322156	G	A	0.100277	0.000679386	CARD11	intron_variant
19	BICF2S23720772	37412388	G	A	0.0851801	0.000684381	TMEM163	intron_variant
8	BICF2P682367	68865901	G	A	0.457123	0.000687832	BEGAIN-DLK1	intergenic_region
19	BICF2G63046708	28048627	A	G	0.142462	0.000696629	U6-TSN	intergenic_region
18	BICF2P129634	53233190	A	G	0.162517	0.00069855	ENSCAFG00000015061	upstream_gene_variant
18	BICF2P352307	53299159	A	G	0.162517	0.00069855	RTN3	upstream_gene_variant
16	BICF2P550869	46156760	A	G	0.490318	0.000699597	IRF2-ENPP6	intergenic_region
7	BICF2G63087760	82709196	T	A	0.455494	0.000705507	0	0
4	BICF2P802400	32463712	C	A	0.237535	0.000708036	CDHR1	downstream_gene_variant
17	BICF2S23152690	13065268	A	G	0.403181	0.000715631	U4-SMC6	intergenic_region
26	BICF2P996912	5350003	A	G	0.204703	0.000716817	NCOR2	intron_variant
13	TIGRP2P175164_rs9015357	34467889	A	G	0.295297	0.000719855	COL22A1-KCNK9	intergenic_region
28	BICF2G630274265	16436113	G	A	0.165049	0.000725255	SFR1	upstream_gene_variant
15	BICF2G630426876	54970726	G	A	0.294606	0.000737739	GRIA2-ENSCAFG00000027408	intergenic_region
14	BICF2S23647964	50679739	A	G	0.34509	0.000739623	ENSCAFG00000003294-7SK	intergenic_region
5	BICF2P277083	75681334	A	G	0.0926694	0.000757302	ZNRF1	intron_variant
31	BICF2G630740753	33200601	A	G	0.230982	0.000757738	SNORA19-KCNJ15	intergenic_region
4	BICF2P460992	32454875	A	G	0.239972	0.000791396	CDHR1	intron_variant
21	BICF2P1039498	26506643	A	G	0.245505	0.000799382	STIM1	intron_variant
5	BICF2S23014586	25892221	A	G	0.17867	0.000800004	MRPS36-ENSCAFG00000001472	intergenic_region
3	BICF2G630358205	90876433	A	G	0.0587828	0.000825997	ENSCAFG00000016664-ANAPC13	intergenic_region
28	BICF2G630264213	38238613	A	G	0.106501	0.000826403	MGMT	intron_variant
12	BICF2P1463632	11914766	A	G	0.386584	0.000828358	ABCC10	upstream_gene_variant
33	TIGRP2P385447_rs9043116	10702828	A	G	0.452282	0.000830522	ENSCAFG00000025525-ALCAM	intergenic_region
13	BICF2G630616243	26653152	A	T	0.388658	0.000830983	5S_rRNA-GSDMC	intergenic_region
18	BICF2P449132	57062556	C	A	0.399584	0.000844906	0	0
28	BICF2P475093	25957101	A	C	0.141667	0.000849977	ATRNL1	intron_variant
4	BICF2S23030187	21422790	A	G	0.228216	0.000853105	NODAL-PALD1	intergenic_region
16	BICF2P222240	49628051	A	G	0.109267	0.000867242	7SK-SNORD22	intergenic_region
16	TIGRP2P218092_rs9055618	49637824	G	A	0.109267	0.000867242	7SK-SNORD22	intergenic_region
4	BICF2P537798	22722539	A	G	0.093185	0.000867906	CHST3-SPOCK2	intergenic_region
4	BICF2S23024691	60273800	G	A	0.233057	0.000868352	HTR4	upstream_gene_variant
5	BICF2G630238587	74647592	G	A	0.185339	0.000875847	CNTNAP4	intron_variant
21	BICF2G630653601	18165676	A	G	0.380028	0.000890098	ENSCAFG00000004649-ENSCAFG00000030498	intergenic_region
22	BICF2P345056	40470499	G	A	0.416321	0.000961583	U1-5S_rRNA	intergenic_region
8	BICF2P1181028	12310822	A	G	0.0843707	0.000963939	AKAP6-ENSCAFG00000026787	intergenic_region
14	BICF2G630530667	45014971	A	G	0.386584	0.000973482	RP9	intron_variant
30	BICF2G630393980	42710722	A	C	0.293223	0.000989484	0	0
37	BICF2G630131022	28440306	A	G	0.268326	0.00102539	PAX3	intron_variant
13	BICF2G630618444	30743867	A	C	0.11964	0.00103622	ZFAT	intron_variant
12	BICF2S23537345	15980262	A	G	0.0677732	0.00104111	PTCHD4	intron_variant
21	BICF2S23712140	20597342	G	A	0.0698479	0.00104689	GAB2	intron_variant
6	BICF2P1266177	70890863	C	A	0.184647	0.00105531	ACADM-SLC44A5	intergenic_region
16	BICF2P1309528	49614221	A	G	0.11065	0.0010634	7SK-SNORD22	intergenic_region
19	BICF2G63038379	17296602	A	G	0.125864	0.00106903	SPATA5	intron_variant
1	BICF2P837596	56992468	A	G	0.387275	0.00107274	RWDD1	intron_variant
4	BICF2P1154729	22728636	A	G	0.0940526	0.00108251	CHST3-SPOCK2	intergenic_region
29	BICF2P609557	8044699	G	A	0.452282	0.0010973	PENK-7SK	intergenic_region
12	BICF2P319789	43133307	A	G	0.233057	0.00110188	TPBG-UBE3D	intergenic_region
7	BICF2P452299	49227109	A	G	0.0588643	0.00110836	NUDT21-U6	intergenic_region
1	BICF2P1102719	50528808	A	G	0.272161	0.00111461	PARK2	intron_variant
20	BICF2P1244982	50295644	G	A	0.314985	0.00111894	SMARCA4-C19orf52	intergenic_region
11	BICF2P902124	73216265	G	A	0.251037	0.00112981	ENSCAFG00000003544-CDK5RAP2	intergenic_region
1	BICF2P578537	57179448	G	A	0.494444	0.00113528	FAM162B-GPRC6A	intergenic_region
26	BICF2G630195828	39011396	A	G	0.405256	0.00113621	0	0
26	TIGRP2P346753_rs9226110	7594716	A	G	0.423928	0.00114119	ORAI1	intron_variant
17	BICF2G630208974	37905224	A	G	0.082296	0.00114231	EIF2AK3	intron_variant
34	BICF2G630455897	32549100	A	C	0.451591	0.00115503	PDCD10-SERPINI1	intergenic_region
30	BICF2G630409540	18072851	C	A	0.139004	0.00116093	MYO5A	intron_variant
9	BICF2P206197	18311761	A	G	0.0975104	0.00116297	SPATA32	synonymous_variant
5	BICF2G630236653	90000572	A	G	0.253804	0.00117044	0	0
1	BICF2S23429070	20090310	A	C	0.426694	0.00118638	TCF4	intron_variant
10	BICF2P893147	71082800	A	G	0.347856	0.00118922	0	0
12	BICF2P164734	27442589	G	A	0.162517	0.00120041	EYS-U6	intergenic_region
7	BICF2P665348	6448594	G	A	0.206086	0.00120166	CD55-ENSCAFG00000011630	intergenic_region
17	BICF2G630209564	37283519	G	A	0.0656985	0.0012275	IL1RN	intron_variant
5	BICF2P136844	89926072	A	G	0.206086	0.00123263	0	0
22	TIGRP2P291919_rs8547669	29551663	A	G	0.0622407	0.00123878	LMO7	intron_variant
18	BICF2P753808	14065904	A	G	0.0713296	0.0012493	CCDC71L-ENSCAFG00000003985	intergenic_region
9	BICF2P751777	37729220	C	A	0.338643	0.00125333	ENSCAFG00000023350-ENSCAFG00000032731	intergenic_region
31	BICF2P52306	24740955	A	G	0.156293	0.00126527	GRIK1-CLDN17	intergenic_region
13	BICF2G630660624	38075883	G	A	0.276625	0.00126604	ZNF7	intron_variant
9	BICF2P295436	55147111	A	G	0.154219	0.00126729	URM1	intron_variant
1	TIGRP2P6204_rs8908230	65991919	G	A	0.227524	0.00127282	RNF146	intron_variant
33	BICF2P100261	8825474	A	G	0.065097	0.00127779	7SK-ENSCAFG00000009682	intergenic_region
1	BICF2P1034115	50717402	A	G	0.434993	0.00128709	PARK2	intron_variant
19	BICF2S23136390	48682177	G	A	0.255878	0.00128929	U6-ACVR2A	intergenic_region
13	BICF2G630611388	21147259	A	C	0.125173	0.00128951	U6-ZHX2	intergenic_region
1	BICF2P722934	62572165	G	A	0.274619	0.0012901	TRDN	intron_variant
18	BICF2P1110035	18840576	A	G	0.333333	0.00129144	MAGI2-GNAI1	intergenic_region
20	BICF2P1367402	54074952	A	G	0.316482	0.00130663	ENSCAFG00000030841	downstream_gene_variant
4	TIGRP2P62815_rs8514072	5282995	G	A	0.280083	0.00132921	IRF2BP2-TARBP1	intergenic_region
34	BICF2G630454601	33853409	G	A	0.460581	0.00134642	MECOM-ENSCAFG00000024240	intergenic_region
14	BICF2P219629	49064101	A	G	0.358921	0.00134702	DNAJB9-SNORD116	intergenic_region
34	BICF2G630456627	31833883	G	A	0.324343	0.00135655	ENSCAFG00000014497-ZBBX	intergenic_region
6	BICF2P827576	16258930	A	G	0.191563	0.00136023	PRKAR1B-PDGFA	intergenic_region
9	BICF2P1398687	17232297	G	A	0.108575	0.00136535	U6-ENSCAFG00000031337	intergenic_region
8	BICF2S23612716	64808247	A	G	0.108033	0.00136812	ENSCAFG00000017720-ENSCAFG00000031190	intergenic_region
33	BICF2G630245635	6395467	G	A	0.447441	0.00137485	COL8A1	intron_variant
8	BICF2P26361	22743711	A	G	0.121001	0.00143648	ENSCAFG00000014093-U6	intergenic_region
14	BICF2G630527849	40251557	A	G	0.358741	0.00144972	SKAP2-HOXA1	intergenic_region
4	BICF2S22941163	29085218	G	A	0.0484094	0.00146067	PPIF	downstream_gene_variant
4	TIGRP2P58888_rs9191779	15721983	G	A	0.123098	0.00148592	REEP3-CTNNA3	intergenic_region
17	BICF2G630208156	39043868	A	C	0.0788382	0.00149516	POLR1A	intron_variant
28	BICF2S23443416	25649819	G	A	0.351314	0.00153158	FAM160B1-TRUB1	intergenic_region
17	BICF2S2354096	8081260	G	A	0.139004	0.00153854	U6-E2F6	intergenic_region
13	BICF2G630617922	30079107	A	G	0.248271	0.00154235	ENSCAFG00000029450-ZFAT	intergenic_region
37	BICF2G630131441	29245090	A	G	0.121024	0.00155113	KCNE4-SCG2	intergenic_region
4	TIGRP2P58008_rs8708807	12205854	G	A	0.0739972	0.00156064	ANK3	synonymous_variant
4	BICF2S23342719	15421537	A	G	0.143154	0.00162172	REEP3	intron_variant
10	BICF2S23113199	46246942	G	A	0.466066	0.00162802	DYNC2LI1	intron_variant
1	BICF2P607285	78700901	A	G	0.34509	0.00165153	ENSCAFG00000001479	downstream_gene_variant
34	TIGRP2P401594_rs8995680	44038931	G	A	0.112725	0.00165357	0	0
6	BICF2S23729483	19404264	G	A	0.173823	0.00165645	KDM8-C6H16orf82	intergenic_region
10	BICF2P132840	65286567	A	G	0.139004	0.00166207	RPS25-MEIS1	intergenic_region
9	BICF2G630474874	60012660	A	C	0.179806	0.00166524	OR5C1-ENSCAFG00000020257	intergenic_region
37	BICF2G630133875	31460953	A	C	0.216459	0.00167017	0	0
17	BICF2S23342938	61352758	G	A	0.42047	0.00168734	FLG2-CRNN	intergenic_region
33	BICF2G630245608	6372401	A	G	0.441909	0.00169385	COL8A1	intron_variant
22	BICF2G630319437	16927596	A	G	0.292936	0.00170732	UBE2E2-U3	intergenic_region
13	TIGRP2P179245_rs9244263	49201294	A	G	0.0587828	0.00170738	IGFBP7	intron_variant
4	BICF2P499250	50430274	A	G	0.207469	0.00171513	ENSCAFG00000017274	upstream_gene_variant
34	BICF2G630456673	31815440	G	A	0.387812	0.00171847	ENSCAFG00000014497-ZBBX	intergenic_region
11	TIGRP2P153419_rs8588049	72627876	G	A	0.134163	0.00172981	BRINP1	downstream_gene_variant
11	TIGRP2P150006_rs8966189	7211434	A	G	0.428769	0.00173255	SEMA6A-ENSCAFG00000000177	intergenic_region
26	BICF2S23510345	5956395	A	G	0.154167	0.00174634	ATP6V0A2	upstream_gene_variant
26	BICF2P321477	41679221	A	G	0.46473	0.00174816	0	0
21	BICF2P910640	35921286	A	G	0.366762	0.00175434	TEAD1	intron_variant
12	BICF2P1283564	27497776	A	G	0.40249	0.00176356	EYS-U6	intergenic_region
9	BICF2S233562	57739102	C	A	0.0511757	0.00177708	MAPKAP1-GAPVD1	intergenic_region
24	BICF2S235643	49037868	A	G	0.115491	0.00177919	0	0
5	BICF2P541650	74341418	A	G	0.0795297	0.00179406	7SK-U6	intergenic_region
33	BICF2S23216989	22835226	G	A	0.270401	0.00180959	IGSF11-C3orf30	intergenic_region
12	TIGRP2P168985_rs8980900	57038322	A	G	0.457815	0.00181334	7SK-POU3F2	intergenic_region
28	BICF2G630268405	26197606	G	A	0.198479	0.00183493	ATRNL1	intron_variant
13	BICF2S23017646	52129406	T	A	0.24723	0.00183614	U6-ENSCAFG00000032523	intergenic_region
34	BICF2P1268181	18407553	A	G	0.263485	0.00185413	IGF2BP2	intron_variant
33	BICF2G63076972	30430868	G	A	0.0511757	0.00186509	BDH1	upstream_gene_variant
37	BICF2G630127475	12265834	G	A	0.254848	0.00186759	ABI2	intron_variant
1	BICF2G630716979	33770746	A	C	0.450207	0.00187392	NMBR	downstream_gene_variant
13	BICF2S2339636	37895005	A	G	0.116183	0.00187465	FOXH1-PPP1R16A	intergenic_region
1	TIGRP2P18335_rs8944574	28674804	A	C	0.284232	0.00189664	PDE7B	intron_variant
13	BICF2G630660656	37805833	A	G	0.116183	0.00190416	ADCK5	upstream_gene_variant
7	BICF2P247537	9409477	A	G	0.405687	0.00190596	KCNH1	intron_variant
15	TIGRP2P206143_rs9018551	61132710	A	G	0.111342	0.00191629	TMEM192-SNORA70	intergenic_region
4	BICF2S23759219	10638311	A	G	0.211618	0.0019219	TFAM-BICC1	intergenic_region
5	BICF2S22922517	90894031	A	G	0.453665	0.00192339	0	0
14	BICF2P1094701	52310003	G	A	0.298064	0.00194012	TMEM168	downstream_gene_variant
10	BICF2P1140670	64426203	A	C	0.10166	0.00195637	SERTAD2-SLC1A4	intergenic_region
10	BICF2P492593	64512298	A	C	0.10166	0.00195637	SLC1A4	downstream_gene_variant
10	BICF2P1310267	64532235	G	A	0.10166	0.00195637	SLC1A4-CEP68	intergenic_region
10	BICF2P576559	64629526	C	A	0.10166	0.00195637	ENSCAFG00000027719-ENSCAFG00000003191	intergenic_region
14	BICF2P999158	40039171	G	A	0.340941	0.00196945	SKAP2	intron_variant
34	BICF2S23445332	32022745	A	G	0.172199	0.00198104	ENSCAFG00000014497-ZBBX	intergenic_region
4	BICF2P718730	69701110	G	A	0.318811	0.00200731	C9	3_prime_UTR_variant
4	BICF2S23019883	21426426	T	A	0.19018	0.00201112	NODAL-PALD1	intergenic_region
18	BICF2P950033	27761321	G	A	0.200553	0.00201919	U1-LRRC4C	intergenic_region
31	BICF2P310059	24725122	G	A	0.146122	0.00202324	GRIK1-CLDN17	intergenic_region
11	BICF2P298491	68447291	C	A	0.0670816	0.00203278	COL27A1	intron_variant
9	BICF2G630834943	34939097	G	C	0.486842	0.00203654	BRIP1	intron_variant
3	BICF2G630360596	92898131	G	A	0.269071	0.00204078	0	0
39	BICF2G630541641	2112334	C	A	0.34509	0.00204933	0	0
17	BICF2S23450957	45079521	A	G	0.0829876	0.00205308	REG3A-7SK	intergenic_region
19	BICF2P77126	9927340	A	C	0.170816	0.00205763	ENSCAFG00000003797-7SK	intergenic_region
4	BICF2S23656631	67265351	G	A	0.191136	0.00208386	GHR-ENSCAFG00000023056	intergenic_region
28	BICF2P549772	25933225	G	A	0.0782548	0.00208774	ATRNL1	intron_variant
18	BICF2P1438978	52840884	A	C	0.210235	0.0020916	FERMT3	intron_variant
36	BICF2P766128	12180756	A	G	0.490305	0.00209576	XIRP2	upstream_gene_variant
13	BICF2G630660641	37853123	G	A	0.358921	0.00210588	TONSL	intron_variant
17	BICF2G630217502	17825303	G	A	0.423237	0.00213648	TDRD15-KLHL29	intergenic_region
6	BICF2S23411165	70913743	G	A	0.165975	0.00213834	ACADM-SLC44A5	intergenic_region
26	BICF2P1448377	41236682	G	A	0.301521	0.00214628	0	0
7	BICF2P46422	30297855	G	A	0.0539419	0.00214812	TIPRL	3_prime_UTR_variant
26	BICF2G630194055	40124829	G	A	0.137621	0.00215289	0	0
12	BICF2P81113	43139647	A	G	0.228216	0.00215759	TPBG-UBE3D	intergenic_region
5	BICF2P589843	11596807	G	A	0.479917	0.00215862	UBASH3B-cfa-mir-99a-2	intergenic_region
10	BICF2G630478327	22915081	A	G	0.176349	0.00216091	SERHL2	intron_variant
22	BICF2S2357592	40263026	A	C	0.219917	0.00217182	U1-5S_rRNA	intergenic_region
1	BICF2P693571	71421327	G	A	0.324343	0.00218413	FANCC	intron_variant
26	BICF2S23162212	7531008	G	A	0.215768	0.00218639	TMEM120B	intron_variant
27	BICF2P1227961	27688044	A	G	0.0926694	0.00219054	AEBP2	intron_variant
35	BICF2G630770349	8626793	G	A	0.489612	0.00220968	ENSCAFG00000009627-ENSCAFG00000009631	intergenic_region
1	BICF2P1332333	66026592	A	G	0.170816	0.00224403	ECHDC1	intron_variant
29	TIGRP2P365714_rs9238933	17611271	A	G	0.0857538	0.00225097	PREX2	intron_variant
13	BICF2G630614832	25186282	A	G	0.13278	0.00225814	U6-MYC	intergenic_region
1	BICF2P1350910	28750805	A	G	0.320822	0.00229751	PDE7B	intron_variant
33	TIGRP2P386774_rs8745098	16181849	A	G	0.300277	0.00229875	PVRL3-CD96	intergenic_region
14	BICF2G630521373	14016497	G	A	0.11065	0.00230525	DBF4	missense_variant
32	BICF2P1278003	31287366	A	C	0.253472	0.0023274	U6-U6	intergenic_region
33	TIGRP2P391968_rs9051986	9844106	A	G	0.137621	0.00233096	ENSCAFG00000009706-ENSCAFG00000025525	intergenic_region
28	BICF2S23137833	42574905	G	A	0.0788382	0.00233213	0	0
33	TIGRP2P386462_rs8744415	14973076	A	G	0.326418	0.00233248	ENSCAFG00000010335-PVRL3	intergenic_region
1	BICF2G630792400	85032555	G	A	0.0739972	0.00233304	ALDH1A1-TMC1	intergenic_region
16	G904f23S68	7937375	A	T	0.172028	0.00234176	ENSCAFG00000028628	intron_variant
13	BICF2S23411343	47575701	A	G	0.150277	0.0023705	SRD5A3	intron_variant
2	BICF2P130328	82523440	G	A	0.213001	0.00241515	KAZN-ENSCAFG00000016352	intergenic_region
1	BICF2S23326432	71649103	G	A	0.131579	0.00241697	FANCC	intron_variant
1	BICF2P721185	45549080	C	G	0.179115	0.00241979	7SK-ENSCAFG00000027914	intergenic_region
4	BICF2G63059752	10097037	A	C	0.172438	0.00243138	U6-RHOU	intergenic_region
17	BICF2G630212588	31810282	A	G	0.355956	0.00243167	THUMPD2-SLC8A1	intergenic_region
1	BICF2P398327	71622600	A	G	0.131397	0.00243674	FANCC	intron_variant
13	BICF2P889231	60884944	A	G	0.112725	0.00244621	GC-NPFFR2	intergenic_region
35	BICF2P827120	3605782	G	A	0.071231	0.00244878	SLC22A23	intron_variant
24	BICF2G630507265	17338817	A	G	0.0684647	0.00246192	SMOX-RNF24	intergenic_region
4	BICF2P132086	22285824	G	A	0.116183	0.00248241	ENSCAFG00000014229	downstream_gene_variant
36	BICF2P1324583	15094381	A	G	0.197095	0.00248651	MYO3B-ENSCAFG00000012501	intergenic_region
11	BICF2P356029	65917384	G	A	0.205964	0.00249602	LPAR1-OR2K2	intergenic_region
4	TIGRP2P66619_rs9174824	83897233	A	G	0.0836791	0.00249735	ENSCAFG00000031957-CDH18	intergenic_region
4	BICF2G63059734	10086654	A	G	0.201936	0.00250037	U6-RHOU	intergenic_region
18	BICF2S23760037	53318011	G	A	0.283241	0.00251053	ATL3	upstream_gene_variant
7	BICF2G63088479	83362707	A	G	0.233057	0.00254036	0	0
30	BICF2G630396440	40060516	G	A	0.178423	0.00254676	C15orf27-FBXO22	intergenic_region
15	BICF2G630419027	63388563	A	G	0.40249	0.002565	SPOCK3-ANXA10	intergenic_region
14	BICF2G630521338	13976343	A	G	0.077455	0.00256918	SLC25A40	intron_variant
14	BICF2G630521364	14004493	A	G	0.077455	0.00256918	DBF4	intron_variant
35	BICF2P334590	13684651	A	G	0.251037	0.00258622	ENSCAFG00000009876	upstream_gene_variant
26	BICF2P772108	41165057	G	A	0.174274	0.00260366	0	0
12	BICF2S23739492	10637718	A	G	0.475795	0.00260851	CCND3-TAF8	intergenic_region
3	BICF2P1331463	77340454	A	G	0.260719	0.00263758	7SK-U6	intergenic_region
35	BICF2G630770548	8763295	G	A	0.439751	0.00264462	ENSCAFG00000009627-ENSCAFG00000009631	intergenic_region
15	BICF2P176891	50744857	A	G	0.161134	0.00264992	ARFIP1	intron_variant
17	BICF2S22934660	36794205	G	A	0.127939	0.00266991	POLR1B	intron_variant
33	BICF2P103704	28191052	G	A	0.325726	0.00267395	SLC12A8	intron_variant
8	BICF2P801654	24186048	A	C	0.0926694	0.00267855	ENSCAFG00000014164	intron_variant
1	BICF2S23110908	21819041	G	A	0.449516	0.002681	DCC	intron_variant
1	BICF2P432405	57414104	A	C	0.47787	0.00268208	RFX6-VGLL2	intergenic_region
4	BICF2S22916105	16610516	G	A	0.16805	0.0027118	REEP3-CTNNA3	intergenic_region
22	TIGRP2P292164_rs8530567	30787255	A	G	0.414938	0.00272104	MYCBP2	intron_variant
10	TIGRP2P142749_rs8522915	72050580	G	A	0.269018	0.00273358	0	0
5	BICF2G630236867	89885784	A	C	0.457123	0.00274492	0	0
8	BICF2S23324185	68786516	G	A	0.439751	0.00274707	WDR25	intron_variant
16	BICF2G630114340	35494993	G	A	0.151662	0.00276804	ERI1	intron_variant
17	BICF2S23425627	6790081	G	A	0.13278	0.0027744	ENSCAFG00000003386-TAF1B	intergenic_region
10	BICF2G630484957	35933728	A	G	0.0739972	0.00277596	SLC5A7-ENSCAFG00000029926	intergenic_region
14	BICF2P1205951	39873483	A	C	0.35755	0.00278398	SNX10-SKAP2	intergenic_region
24	BICF2S23547652	45671232	A	G	0.314661	0.00280618	CDH26-ENSCAFG00000012668	intergenic_region
22	BICF2S22913474	31482328	A	G	0.386427	0.00280829	EDNRB-ENSCAFG00000005195	intergenic_region
34	BICF2P331846	6106804	G	A	0.0843707	0.0028763	FASTKD3	intron_variant
17	BICF2G630202180	52216126	A	G	0.419087	0.00287784	TRIM33	intron_variant
2	BICF2P1039223	44037385	C	A	0.406639	0.00288304	MAP3K1-SETD9	intergenic_region
9	BICF2P616824	54878823	A	G	0.0947441	0.0028833	ZDHHC12	missense_variant
4	BICF2S23411696	79099370	C	A	0.164592	0.00288931	U6-CDH9	intergenic_region
3	BICF2G630348347	74538486	G	A	0.161826	0.00289169	RELL1	intron_variant
12	BICF2P1101667	30810451	G	A	0.466805	0.00290047	U2-ENSCAFG00000002522	intergenic_region
13	BICF2P479575	45392304	C	A	0.447368	0.00292053	USP46	intron_variant
29	BICF2G630627294	29583182	G	A	0.480636	0.00292781	U4-ENSCAFG00000008551	intergenic_region
4	BICF2P722832	20034908	C	A	0.112033	0.00293481	STOX1	intron_variant
4	BICF2S23226629	13271950	A	C	0.260028	0.00294309	RHOBTB1-GAPDH	intergenic_region
13	BICF2G630616789	27575055	A	G	0.248963	0.00294586	ASAP1-ADCY8	intergenic_region
17	BICF2S23027914	14482153	A	G	0.0720222	0.00296978	ENSCAFG00000003760-OSR1	intergenic_region
28	BICF2P1276779	22366920	A	G	0.405256	0.00297297	ADRA2A	upstream_gene_variant
27	TIGRP2P352863_rs8689400	30634362	A	G	0.409972	0.00298607	SLC15A5-DERA	intergenic_region
5	BICF2P788683	22912298	A	G	0.130886	0.00298736	ZC3H12C-U6	intergenic_region
34	BICF2P1418019	29313904	G	A	0.493084	0.00300684	U1-ENSCAFG00000014365	intergenic_region
8	BICF2P970081	57234243	G	A	0.104426	0.00300812	ENSCAFG00000017325-FLRT2	intergenic_region
22	BICF2S2314224	35218609	A	G	0.495851	0.00301	ENSCAFG00000005271-ENSCAFG00000005282	intergenic_region
22	BICF2P789147	23746350	A	G	0.240664	0.00302767	U6atac-ENSCAFG00000004962	intergenic_region
17	BICF2S23033524	18549897	C	A	0.358921	0.00302903	FKBP1B	downstream_gene_variant
17	BICF2G630204107	49639435	G	A	0.304288	0.0030346	C2ORF7	downstream_gene_variant
35	BICF2P1140	28681337	C	A	0.338174	0.00306866	0	0
1	BICF2P944507	58624108	G	A	0.199862	0.00306936	CEP85L	intron_variant
10	BICF2G630484973	35950340	G	A	0.121715	0.0030815	SLC5A7-ENSCAFG00000029926	intergenic_region
9	BICF2G630831765	27439060	G	A	0.126556	0.00310182	CA10	intron_variant
12	BICF2P1045814	46681774	A	G	0.269764	0.00311168	ZNF292	upstream_gene_variant
7	BICF2G630189947	83849000	G	A	0.223684	0.00311412	0	0
38	BICF2G63067279	25441509	A	G	0.357538	0.0031273	0	0
1	BICF2P1224492	22042813	A	C	0.154219	0.00314083	DCC	intron_variant
5	BICF2S23624819	75380411	G	A	0.133148	0.00314867	BCAR1	intron_variant
33	BICF2G63077013	30400060	G	A	0.312586	0.00315247	DLG1-BDH1	intergenic_region
4	BICF2P1036659	18050101	C	A	0.461272	0.00316384	CTNNA3	intron_variant
18	BICF2G630690526	49305711	A	G	0.252786	0.00316799	PPP6R3	intron_variant
33	BICF2P67454	13637223	C	A	0.0560166	0.00316892	MYH15	intron_variant
14	BICF2G630527875	40282860	A	G	0.490985	0.00317006	HOXA3	intron_variant
8	G502f53S162	29039623	G	A	0.295706	0.00317122	snoU2_19-FERMT2	intergenic_region
13	BICF2G630664929	32725064	A	G	0.382434	0.00320104	5S_rRNA-ENSCAFG00000029044	intergenic_region
6	BICF2P1457018	71476122	A	G	0.115491	0.00321842	LHX8-TYW3	intergenic_region
14	BICF2G630517194	3855158	G	A	0.347165	0.00323834	EXOC4	intron_variant
8	BICF2P1316287	52484139	G	A	0.169433	0.00324502	SNORA31-DIO2	intergenic_region
4	BICF2S23412281	21441624	A	G	0.226141	0.00325145	PALD1	upstream_gene_variant
28	BICF2S23640515	25588371	G	A	0.391425	0.00325281	ABLIM1-FAM160B1	intergenic_region
29	BICF2P57799	19545685	G	A	0.132089	0.003257	NCOA2-TRAM1	intergenic_region
14	BICF2G630530716	45067944	G	A	0.344398	0.00326783	FKBP9	downstream_gene_variant
5	BICF2P1457235	80457839	A	G	0.0885201	0.00326857	SNTB2	intron_variant
19	BICF2P935169	6542580	A	C	0.0746888	0.00327335	ENSCAFG00000030512-U4	intergenic_region
4	G311f55S107	68618277	A	G	0.27455	0.00327516	TTC33	upstream_gene_variant
10	BICF2S23731463	12731854	G	A	0.405256	0.00327787	PTPRR-TSPAN8	intergenic_region
10	BICF2S23554378	61594335	G	A	0.0567867	0.00328238	XPO1-U6	intergenic_region
4	BICF2S23554160	30341233	A	G	0.447295	0.00328354	SH2D4B-5S_rRNA	intergenic_region
1	BICF2P1167481	46211545	A	C	0.450899	0.00332426	U6-ARID1B	intergenic_region
34	BICF2P1422651	5971953	A	G	0.151452	0.00333332	ENSCAFG00000031045-MTRR	intergenic_region
11	TIGRP2P152270_rs9175629	69877426	A	G	0.225762	0.00334327	ENSCAFG00000003473-PAPPA	intergenic_region
37	BICF2G630130171	27614715	A	C	0.0691563	0.0033645	U6-EPHA4	intergenic_region
24	BICF2G630505554	19786770	A	C	0.481328	0.00336546	RAD21L1-TMEM74B	intergenic_region
24	BICF2S23144045	14389064	C	A	0.157895	0.00336765	HAO1-BMP2	intergenic_region
22	TIGRP2P295064_rs8737708	48251602	G	A	0.418396	0.00336963	IPO5-FARP1	intergenic_region
16	BICF2S24413734	7893930	A	G	0.187414	0.0033773	ENSCAFG00000003900-ENSCAFG00000028628	intergenic_region
18	BICF2G630690502	49336559	A	C	0.152835	0.00339977	PPP6R3	intron_variant
37	BICF2G630130148	27577713	G	A	0.373269	0.00342273	SLC4A3-U6	intergenic_region
29	BICF2G630625824	27789672	A	G	0.249654	0.00342633	ZBTB10-ZNF704	intergenic_region
13	BICF2P1078108	27014183	A	G	0.139696	0.00343603	SNORA73	downstream_gene_variant
2	TIGRP2P32102_rs8934849	82229117	A	G	0.254495	0.00343656	FHAD1	intron_variant
7	BICF2P109632	14334954	G	A	0.35408	0.00344063	XPR1	intron_variant
29	BICF2P1278738	44081888	A	G	0.381051	0.00344944	0	0
32	BICF2P448681	31279609	A	G	0.255878	0.00345431	U6	upstream_gene_variant
8	BICF2P583737	15110450	G	A	0.246196	0.00346741	MBIP-NKX2-8	intergenic_region
3	BICF2S23313295	49390061	A	T	0.441909	0.00346801	KLHL25-7SK	intergenic_region
5	BICF2S2336655	89092415	C	A	0.117816	0.00348455	0	0
34	BICF2P1211986	35320112	G	A	0.48892	0.00351474	SNORA67	downstream_gene_variant
33	BICF2S23011660	32553006	G	A	0.441909	0.00351507	0	0
33	BICF2P921907	6393628	A	G	0.399723	0.00352228	COL8A1	intron_variant
34	BICF2G630453748	34965757	G	A	0.318119	0.00352368	SLC7A14	intron_variant
5	BICF2S23721520	76052349	G	A	0.152144	0.00353922	GLG1	intron_variant
14	BICF2S2396704	27860176	A	C	0.224066	0.00356322	ENSCAFG00000029728-ETV1	intergenic_region
4	BICF2P328299	22210820	G	A	0.0638003	0.00358997	ENSCAFG00000014229	intron_variant
24	BICF2P1238774	43373325	A	G	0.351314	0.00359369	APCDD1L-ENSCAFG00000029257	intergenic_region
10	TIGRP2P142755_rs9118059	72057722	A	G	0.165284	0.00359942	0	0
34	BICF2P34720	31851867	G	A	0.428077	0.0036108	ENSCAFG00000014497-ZBBX	intergenic_region
10	BICF2P794522	70099413	C	A	0.382434	0.00361595	0	0
34	BICF2P991811	13664508	G	A	0.356155	0.00363213	PEX5L-TTC14	intergenic_region
1	BICF2P1326699	30021615	G	A	0.110111	0.00363293	OLIG3-TNFAIP3	intergenic_region
11	BICF2P1321472	7201372	A	G	0.415629	0.00364157	SEMA6A-ENSCAFG00000000177	intergenic_region
5	BICF2G63034379	31343141	G	A	0.452282	0.00366795	DHX33	intron_variant
34	BICF2G630456668	31820598	G	A	0.446058	0.00368339	ENSCAFG00000014497-ZBBX	intergenic_region
30	BICF2G630397972	38159752	G	A	0.310512	0.00369552	5S_rRNA-C15orf39	intergenic_region
1	BICF2P4940	50539992	G	A	0.309129	0.00369761	PARK2	intron_variant
20	BICF2P170748	50355416	G	A	0.389902	0.00370379	CARM1-C19orf38	intergenic_region
9	BICF2P793963	32431122	A	G	0.29184	0.00372034	ENSCAFG00000029375-CCDC182	intergenic_region
22	BICF2G63091667	62619537	T	A	0.269018	0.00372228	0	0
4	BICF2G630173661	82171986	G	A	0.435685	0.00372916	ENSCAFG00000019023-CDH12	intergenic_region
13	BICF2S23444068	37980714	G	A	0.256588	0.00373377	ARHGAP39	intron_variant
34	BICF2G630456104	32389078	G	A	0.327109	0.00374027	WDR49	intron_variant
3	TIGRP2P43686_rs8535575	50455954	A	G	0.166898	0.00374492	AGBL1-7SK	intergenic_region
6	BICF2S23157686	71513929	A	G	0.38036	0.00375575	LHX8-TYW3	intergenic_region
12	BICF2P206919	15663053	G	A	0.497922	0.0037591	CD2AP	intron_variant
29	BICF2G630625794	27746533	G	C	0.289073	0.00378995	ZBTB10	upstream_gene_variant
3	BICF2P1468862	64006757	A	G	0.391425	0.00379085	LDB2-TAPT1	intergenic_region
35	BICF2S23247590	8332470	A	G	0.450893	0.00380237	SLC35B3	upstream_gene_variant
26	BICF2P1398953	3634534	A	G	0.158368	0.00382049	TMEM132C-ENSCAFG00000006853	intergenic_region
11	BICF2S23439277	5614265	C	A	0.382434	0.00384167	AP3S1	downstream_gene_variant
7	BICF2P1203065	69786160	A	G	0.098338	0.00386786	MYOM1	intron_variant
18	BICF2P945447	51547150	A	G	0.426003	0.00386796	RELA	upstream_gene_variant
7	BICF2G63086802	81807071	G	A	0.413435	0.00387046	0	0
12	BICF2S23117903	20817838	G	A	0.480474	0.00387304	ELOVL5-SNORA44	intergenic_region
3	TIGRP2P39240_rs9184695	23724971	C	G	0.266943	0.00387757	EDIL3	intron_variant
1	BICF2P731208	76312722	A	G	0.197787	0.00387783	FRMD3-RASEF	intergenic_region
12	BICF2P125185	20765109	G	A	0.374136	0.0038803	ELOVL5	upstream_gene_variant
29	BICF2P785730	6527627	A	G	0.436376	0.00388994	ENSCAFG00000017753-XKR4	intergenic_region
33	BICF2G630246468	8898340	A	C	0.125864	0.00389767	7SK-ENSCAFG00000009682	intergenic_region
4	BICF2G63058386	8810543	A	G	0.160194	0.00390986	cfa-mir-1841-U6	intergenic_region
15	BICF2P431266	60451464	A	G	0.391274	0.00392603	MARCH1-ENSCAFG00000031670	intergenic_region
12	BICF2P730493	46749800	C	A	0.292244	0.00392663	ZNF292	intron_variant
14	BICF2P78632	48206162	A	C	0.135724	0.00393244	ELMO1	intron_variant
18	BICF2S23532826	29164201	A	C	0.350622	0.00393376	LRRC4C-ENSCAFG00000006775	intergenic_region
16	BICF2P495454	46334456	A	G	0.445367	0.00395384	ENPP6	intron_variant
12	BICF2P1069454	20769724	G	A	0.37621	0.00395448	ELOVL5-SNORA44	intergenic_region
34	BICF2S234102	31893271	A	G	0.412742	0.00396295	ENSCAFG00000014497-ZBBX	intergenic_region
21	BICF2G630653659	18121140	G	A	0.428769	0.00399132	ENSCAFG00000004649-ENSCAFG00000030498	intergenic_region
16	BICF2S23042991	4966300	A	G	0.398884	0.00402876	7SK-TPK1	intergenic_region
8	BICF2P394744	70347569	A	C	0.122407	0.00402909	TECPR2	intron_variant
21	BICF2S23224465	14824865	A	G	0.449516	0.00402952	U6-DLG2	intergenic_region
19	BICF2S23327986	43922894	A	C	0.375346	0.00403002	ENSCAFG00000005456-ENSCAFG00000024630	intergenic_region
2	BICF2P1431927	45413462	C	A	0.42067	0.00403533	GAPT-RAB3C	intergenic_region
17	BICF2S23754566	18533297	G	C	0.295297	0.00403585	FKBP1B	upstream_gene_variant
34	BICF2P1383830	5956571	A	G	0.152355	0.00403875	ENSCAFG00000031045-MTRR	intergenic_region
2	BICF2P765658	72223042	A	G	0.363762	0.00404541	DNAJC8	downstream_gene_variant
21	BICF2S23523816	48332824	A	G	0.150069	0.00405022	BDNF-U6	intergenic_region
1	BICF2P6216	106844696	G	A	0.0892116	0.00405211	ADM5	downstream_gene_variant
6	BICF2S23130075	71519314	G	A	0.377424	0.00406617	LHX8-TYW3	intergenic_region
34	BICF2S23122765	5847886	A	G	0.180055	0.00407812	ENSCAFG00000031045-MTRR	intergenic_region
13	BICF2S2317744	44413841	G	A	0.106501	0.00408768	FRYL	intron_variant
1	BICF2S23244630	119572385	G	A	0.284232	0.00408771	ZNF507	intron_variant
14	BICF2S23715556	49085738	A	G	0.450899	0.00409284	DNAJB9-SNORD116	intergenic_region
30	BICF2P675614	19934071	G	A	0.124481	0.00411979	UNC13C	intron_variant
6	TIGRP2P81019_rs8968368	33377323	G	A	0.295989	0.00412297	PMM2-ABAT	intergenic_region
13	BICF2P1175393	47351335	G	A	0.107884	0.00412361	KIT-ENSCAFG00000002088	intergenic_region
10	BICF2P468087	36085590	G	A	0.342324	0.00414177	ENSCAFG00000029926-FAM32A	intergenic_region
1	BICF2G630722718	41537951	G	A	0.257261	0.00417093	MTHFD1L-ENSCAFG00000029168	intergenic_region
16	BICF2S2352781	55339792	A	G	0.224066	0.00417452	CSMD1	intron_variant
12	TIGRP2P162163_rs9116899	32608494	G	A	0.375519	0.00419465	COL19A1	intron_variant
9	TIGRP2P122994_rs9180347	18721267	A	C	0.219917	0.00420084	ADAM11	intron_variant
8	TIGRP2P109141_rs8661440	22715111	G	A	0.157676	0.00421077	ENSCAFG00000014093-U6	intergenic_region
33	BICF2G63079276	23268563	C	A	0.39043	0.00421463	PLA1A	downstream_gene_variant
31	BICF2G630732783	14789324	A	G	0.27455	0.00424219	TMPRSS15-ENSCAFG00000008364	intergenic_region
29	BICF2G630632057	35624850	A	G	0.469571	0.00424268	CALB1-TMEM64	intergenic_region
33	BICF2G63080087	22291679	A	G	0.255878	0.00424534	BC040587-ENSCAFG00000001369	intergenic_region
17	BICF2P1271191	6831964	C	A	0.273167	0.00425602	ENSCAFG00000003386-TAF1B	intergenic_region
3	TIGRP2P54278_rs8814964	85232374	C	G	0.29668	0.00427062	LGI2-CCDC149	intergenic_region
16	TIGRP2P226324_rs8713079	59524174	G	A	0.3361	0.00429156	ENSCAFG00000030674-CHR_END	intergenic_region
28	TIGRP2P362380_rs8838495	41630607	G	A	0.330791	0.00429259	0	0
35	BICF2S23723752	8696749	G	A	0.262102	0.00432137	ENSCAFG00000009627-ENSCAFG00000009631	intergenic_region
30	BICF2G630409152	18542148	A	G	0.493084	0.00432371	GSR-U6	intergenic_region
11	BICF2P1098772	5675223	A	G	0.324343	0.00433811	AP3S1-ENSCAFG00000000199	intergenic_region
33	BICF2G630245080	5225226	A	G	0.134855	0.00434398	ENSCAFG00000024166-7SK	intergenic_region
13	BICF2G630611327	21116818	C	A	0.14177	0.00434818	U6-ZHX2	intergenic_region
19	BICF2G63039008	18343310	A	G	0.145228	0.00436053	EXOSC9-ANXA5	intergenic_region
29	BICF2P343836	15399254	A	G	0.114108	0.00436772	PDE7A	downstream_gene_variant
10	BICF2S2367328	20231672	C	A	0.342647	0.00437765	WNT7B-ATXN10	intergenic_region
37	BICF2G630133006	30642021	A	G	0.23338	0.00438024	DLGAP2	intron_variant
35	BICF2G630770649	9326620	A	G	0.0563282	0.00439239	ENSCAFG00000009631-OFCC1	intergenic_region
11	BICF2P433893	70913592	A	G	0.206777	0.0044028	ASTN2	intron_variant
17	BICF2G630220118	14034880	A	G	0.195021	0.00441226	ENSCAFG00000003760-OSR1	intergenic_region
13	BICF2G630614534	24994072	C	A	0.448133	0.00441433	U6-MYC	intergenic_region
11	TIGRP2P153246_rs8906130	72236071	A	G	0.0684647	0.00441653	TLR4-U6	intergenic_region
21	BICF2G630650098	26620084	T	A	0.384349	0.0044264	RRM1	intron_variant
18	BICF2P377668	31467275	A	C	0.418396	0.00443695	U6-C11orf74	intergenic_region
29	BICF2P139173	22067666	A	G	0.100277	0.0044375	STAU2	intron_variant
12	BICF2P201793	23329797	A	G	0.484094	0.0044383	BMP5-COL21A1	intergenic_region
1	TIGRP2P3816_rs8703370	57051744	A	C	0.0829876	0.00443984	ENSCAFG00000000894-RSPH4A	intergenic_region
33	BICF2G63074827	33699401	G	A	0.269018	0.00444771	0	0
29	BICF2P328441	16463092	A	G	0.201245	0.00446055	SNORD87	upstream_gene_variant
10	BICF2P585249	69639086	C	A	0.376781	0.00446732	0	0
4	BICF2G63058368	8791503	A	G	0.161134	0.00447057	cfa-mir-1841-U6	intergenic_region
19	BICF2S23642258	17111501	A	G	0.173582	0.0044886	SPATA5	intron_variant
22	BICF2G630336067	52242892	G	A	0.0909091	0.00449542	CCDC168-TEX30	intergenic_region
3	TIGRP2P42363_rs9061832	41706030	C	A	0.249654	0.00449655	SYNM-IGF1R	intergenic_region
33	BICF2G630245754	7468432	A	G	0.23444	0.00449706	ABI3BP	intron_variant
33	BICF2G630245758	7484346	G	A	0.23444	0.00449706	ABI3BP	intron_variant
15	TIGRP2P207997_rs8903426	66453908	C	A	0.135546	0.00450259	0	0
14	BICF2P753624	39879329	A	G	0.244122	0.00451862	SNX10-SKAP2	intergenic_region
20	BICF2P494127	47636037	G	C	0.410097	0.00453303	ENSCAFG00000031256-ENSCAFG00000016245	intergenic_region
17	BICF2P700434	53347539	A	G	0.071231	0.00453897	CASQ2-NHLH2	intergenic_region
34	BICF2P310737	15008711	A	G	0.155125	0.00455056	SOX2OT_exon4-SNORA72	intergenic_region
28	TIGRP2P361388_rs9240604	38834439	G	A	0.100968	0.00455946	GLRX3-TCERG1L	intergenic_region
9	BICF2P626445	55126889	A	G	0.197787	0.00457276	U3	downstream_gene_variant
4	BICF2S22962681	23656526	G	A	0.174274	0.00458152	P4HA1	intron_variant
30	BICF2P1443519	16942829	A	G	0.260028	0.00459296	TNFAIP8L3-CYP19A1	intergenic_region
16	BICF2P745964	7917352	A	G	0.181881	0.00461146	ENSCAFG00000003900-ENSCAFG00000028628	intergenic_region
37	BICF2P1010613	30036682	T	A	0.311895	0.00461857	U12-ERICH1	intergenic_region
32	TIGRP2P381413_rs8816747	25641483	A	G	0.399032	0.00463734	CXXC4-ENSCAFG00000026674	intergenic_region
4	BICF2G63057694	7966609	A	G	0.33518	0.00463807	ENSCAFG00000030982	intron_variant
38	BICF2P538061	4599952	A	C	0.0885201	0.00465901	Y_RNA-HRPT2	intergenic_region
4	BICF2P346227	32471628	C	A	0.224758	0.00468305	LRIT2	upstream_gene_variant
9	BICF2P8441	22724095	A	G	0.102351	0.00469183	IKZF3	intron_variant
34	BICF2P1025831	31867174	A	G	0.41148	0.00469958	ENSCAFG00000014497-ZBBX	intergenic_region
18	BICF2P439331	29159029	A	G	0.248271	0.00471078	LRRC4C-ENSCAFG00000006775	intergenic_region
3	BICF2P1161338	23723692	G	A	0.264624	0.00472972	EDIL3	intron_variant
1	BICF2P1236522	122683136	G	A	0.264177	0.0047358	0	0
38	BICF2G63070354	20578035	A	G	0.0912863	0.00475162	NOS1AP	intron_variant
3	BICF2P1133207	89531836	G	A	0.2213	0.00476748	RPL7A-ENSCAFG00000016642	intergenic_region
12	BICF2P262503	12475821	G	A	0.229224	0.00477118	VEGFA-MRPL14	intergenic_region
37	BICF2P380828	11518419	A	G	0.0767635	0.00478154	BMPR2	intron_variant
5	BICF2P1082888	69941485	A	G	0.387883	0.00478886	HSD17B2	intron_variant
3	BICF2P954856	73703936	G	A	0.396266	0.00483779	KLF3-TBC1D1	intergenic_region
11	BICF2G630311235	76942663	G	A	0.225762	0.00484039	0	0
13	BICF2S23259014	27318760	A	G	0.106501	0.00484796	ASAP1	intron_variant
17	BICF2P328932	13278343	G	A	0.233703	0.00489069	MSGN1-KCNS3	intergenic_region
26	BICF2G630194845	39577798	A	G	0.493084	0.00489178	0	0
37	BICF2P151740	24593034	A	G	0.493776	0.00490123	TNS1	intron_variant
34	BICF2P542470	9246691	A	G	0.33518	0.00490853	U6-IRX1	intergenic_region
17	BICF2P1181417	48614530	A	G	0.337483	0.00491472	AUP1	synonymous_variant
29	BICF2S23142766	44541245	A	G	0.100968	0.0049293	0	0
13	TIGRP2P177685_rs9054064	43790239	A	G	0.386584	0.00493361	NFXL1	intron_variant
14	BICF2P412060	34052693	A	G	0.189488	0.00494306	TMEM196-ENSCAFG00000029642	intergenic_region
19	BICF2P464589	19834063	G	A	0.132089	0.00494997	ENSCAFG00000004192-ENSCAFG00000025619	intergenic_region
7	BICF2S2327459	68027869	A	G	0.151452	0.00495261	YES1-ENSCAFG00000018373	intergenic_region
34	BICF2G630454470	34155688	G	A	0.428769	0.00495691	ENSCAFG00000024240-7SK	intergenic_region
13	BICF2P1045573	37954808	C	A	0.262794	0.00496175	ARHGAP39	intron_variant
4	BICF2P380495	26182757	G	A	0.205679	0.00496312	C10orf11	intron_variant
18	BICF2P138584	47597293	A	G	0.127248	0.0049685	SHANK2	intron_variant
13	BICF2G630660658	37801221	A	G	0.116246	0.00497089	VPS28	intron_variant
3	TIGRP2P43677_rs8680257	50427964	A	G	0.152144	0.00499086	AGBL1-7SK	intergenic_region
34	BICF2P990340	18770065	A	G	0.276625	0.00499265	U6	upstream_gene_variant
21	BICF2P865309	44024003	T	A	0.28769	0.00503522	SLC17A6	intron_variant
36	BICF2G630763156	11700476	A	G	0.431535	0.00504196	SCN7A-ENSCAFG00000011673	intergenic_region
12	BICF2P1418775	21476340	G	A	0.24343	0.00504364	7SK	upstream_gene_variant
26	BICF2P897586	7258850	C	G	0.289765	0.00506138	MLXIP-BCL7A	intergenic_region
1	BICF2S23910674	52721746	G	C	0.131397	0.00506311	QKI-HNRNPDL	intergenic_region
14	BICF2P790345	48019081	G	A	0.204703	0.00507075	AOAH	intron_variant
23	BICF2G630388374	13589064	A	G	0.379668	0.00508975	SNORA73-GADL1	intergenic_region
4	BICF2S23410202	12067224	A	G	0.103734	0.00511211	CCDC6	intron_variant
11	BICF2G630311021	76666267	A	G	0.368603	0.00511428	0	0
34	BICF2G630453117	35460232	A	G	0.211618	0.00512176	TNIK	intron_variant
4	BICF2P1001451	68493055	A	G	0.0636238	0.00512319	C7	intron_variant
34	BICF2G630453669	35018508	A	G	0.109267	0.00514	SLC7A14	intron_variant
7	BICF2P63171	83379746	A	G	0.406639	0.00514501	0	0
33	BICF2S23247943	4869804	A	G	0.0673611	0.0051536	ARL6-ENSCAFG00000009117	intergenic_region
7	BICF2G630551991	16285984	A	G	0.20332	0.00515629	DHX9	intron_variant
31	BICF2G630740730	33193232	A	G	0.143154	0.0051597	SNORA19-KCNJ15	intergenic_region
20	BICF2S2376782	32799545	A	G	0.392116	0.00518446	DENND6A	intron_variant
28	BICF2S23155757	30905296	C	A	0.475795	0.00521666	WDR11-FGFR2IIIC	intergenic_region
2	BICF2S23653782	52743318	A	G	0.208852	0.00521759	CD180-PIK3R1	intergenic_region
30	BICF2G630409538	18079760	A	C	0.417704	0.00523948	MYO5A	intron_variant
10	BICF2G630668802	12815982	G	A	0.347856	0.00524454	TSPAN8	intron_variant
36	BICF2G630766511	4483301	A	C	0.127424	0.0052557	PKP4	intron_variant
13	BICF2G630663240	34647025	A	G	0.430844	0.00525827	TRAPPC9	intron_variant
25	BICF2G630467784	14973271	A	C	0.307054	0.00525893	ENSCAFG00000032664-TNFRSF19	intergenic_region
21	BICF2G630640531	50445195	G	A	0.466805	0.00526525	MS4A2	upstream_gene_variant
13	BICF2P426102	59231429	G	A	0.0658807	0.00527151	SULT1B1	intron_variant
9	BICF2S2315732	26227162	C	A	0.162517	0.00528649	COL1A1-snoU2_19	intergenic_region
9	BICF2P813098	26232743	G	A	0.162517	0.00528649	snoU2_19	upstream_gene_variant
35	BICF2G630770939	9630203	G	A	0.0781466	0.0052932	OFCC1	intron_variant
9	BICF2P821700	22810572	A	G	0.144737	0.00529333	ENSCAFG00000028772	missense_variant
26	BICF2S24412680	5326516	A	G	0.229917	0.00530596	NCOR2	intron_variant
7	BICF2S23250027	60202955	G	A	0.38036	0.00531084	U6-5S_rRNA	intergenic_region
2	BICF2P34741	72019199	A	G	0.0753804	0.00531389	PHACTR4	intron_variant
10	BICF2G630488256	42660173	A	G	0.11065	0.00531569	AFF3	intron_variant
19	BICF2S22927251	43471362	G	A	0.459198	0.0053212	LRP1B	intron_variant
16	BICF2G630849507	21351379	A	C	0.416205	0.00533122	PSD3	intron_variant
9	BICF2G630834126	33476545	A	G	0.0525588	0.00533717	PPM1E	intron_variant
18	BICF2P694235	29109887	A	G	0.345827	0.00534864	LRRC4C-ENSCAFG00000006775	intergenic_region
13	BICF2P873212	38916943	A	G	0.153791	0.00534987	PHOX2B-TMEM33	intergenic_region
19	BICF2G63039000	18339508	A	G	0.142462	0.00535765	EXOSC9	upstream_gene_variant
12	BICF2S23148579	26625280	A	G	0.161826	0.00536722	ENSCAFG00000006053-LGSN	intergenic_region
22	BICF2S23330284	34921309	C	A	0.106501	0.00538144	ENSCAFG00000028934-ENSCAFG00000005268	intergenic_region
37	BICF2P1511701	15525465	A	T	0.167358	0.00538408	KLF7	intron_variant
1	BICF2P1090887	29940321	A	G	0.0781466	0.00542541	OLIG3-TNFAIP3	intergenic_region
18	TIGRP2P257778_rs9079155	55643887	C	A	0.296503	0.00542716	ENSCAFG00000032484-MAD2L1	intergenic_region
16	BICF2G630847355	18095766	A	G	0.205394	0.00544429	PAXIP1	intron_variant
4	BICF2P1337798	48622469	A	G	0.233057	0.00544807	5S_rRNA-U6	intergenic_region
3	BICF2P729215	14848270	A	G	0.460581	0.0054517	ANKRD32	intron_variant
12	BICF2P981335	29269409	G	A	0.248271	0.00545497	ENSCAFG00000023580-SNORA62	intergenic_region
8	BICF2P1344858	35514426	C	A	0.14177	0.00545721	C14orf39	intron_variant
12	TIGRP2P160851_rs8518664	26612079	G	A	0.189488	0.00548725	ENSCAFG00000006053-LGSN	intergenic_region
11	BICF2P646953	71446660	A	G	0.0535466	0.00548867	TLR4-U6	intergenic_region
2	BICF2S23121772	44049285	G	A	0.359223	0.00550676	SETD9	intron_variant
4	BICF2P1053785	22057232	G	A	0.497925	0.00551359	UNC5B	intron_variant
1	BICF2P368418	78375171	A	C	0.352006	0.0055211	ENSCAFG00000001469-ENSCAFG00000014649	intergenic_region
20	BICF2P462132	61067911	A	G	0.353727	0.005532	0	0
37	TIGRP2P419399_rs9180085	18368598	A	G	0.384882	0.00554028	CPS1	intron_variant
14	BICF2P1339508	24664350	G	A	0.0968188	0.00555394	NXPH1-5S_rRNA	intergenic_region
11	BICF2P592493	56178951	A	G	0.193906	0.00555954	COL15A1-TGFBR1	intergenic_region
13	BICF2P1494818	59834171	A	C	0.417704	0.00556094	ENSCAFG00000029608-AMTN	intergenic_region
18	BICF2P809395	40086907	A	G	0.156985	0.00557355	ENSCAFG00000030499	synonymous_variant
17	BICF2G630205480	48139638	G	A	0.445367	0.00557824	TACR1	intron_variant
9	BICF2P741632	50112934	A	G	0.0629322	0.0055788	VAV2	intron_variant
5	BICF2S2459722	4195975	A	G	0.251729	0.00560616	SNX19-ADAMTS15	intergenic_region
28	BICF2G630271101	22360446	C	G	0.105118	0.00560785	SHOC2-ADRA2A	intergenic_region
30	BICF2G630409193	18534001	A	G	0.488372	0.00560865	GSR-U6	intergenic_region
10	BICF2G630489164	43666516	A	G	0.114108	0.0056109	TSGA10	intron_variant
18	BICF2P431919	18860238	G	A	0.349239	0.00562006	MAGI2-GNAI1	intergenic_region
17	BICF2G630210698	35370728	A	G	0.329184	0.0056261	ACOXL	intron_variant
14	BICF2P1061483	38991193	A	G	0.470222	0.00562842	U6-U4	intergenic_region
1	BICF2G630794729	79939378	G	A	0.281466	0.00563973	ENSCAFG00000030357	intron_variant
12	BICF2S23624743	11393424	A	G	0.116343	0.00564903	GLTSCR1L	intron_variant
9	BICF2G630473027	55841605	A	C	0.281163	0.00565043	FAM129B	intron_variant
29	BICF2S23016767	3110748	G	A	0.0546335	0.00565507	U6-PXDNL	intergenic_region
7	BICF2S23431040	27003270	A	G	0.291148	0.00565644	DNM3	intron_variant
33	BICF2S23126809	13828795	C	A	0.0576389	0.00565939	KIAA1524	intron_variant
9	BICF2P154580	56783385	A	C	0.11731	0.00567246	MVB12B	intron_variant
3	BICF2P358326	74174311	G	A	0.12379	0.00567558	TBC1D1	intron_variant
19	BICF2P496043	44189636	G	A	0.301939	0.00567895	ENSCAFG00000024630-ENSCAFG00000030677	intergenic_region
29	TIGRP2P368744_rs9162776	9638562	A	G	0.320194	0.00567959	TOX	intron_variant
14	BICF2P37732	27475293	G	A	0.0746888	0.00572664	ENSCAFG00000002317-ARL4A	intergenic_region
3	BICF2G630358129	90842529	A	G	0.45574	0.00573596	ENSCAFG00000016664-ANAPC13	intergenic_region
17	BICF2P964775	46000595	A	C	0.421944	0.00575263	7SK-LRRTM4	intergenic_region
18	BICF2S2448465	32150884	G	A	0.386584	0.00576758	LDLRAD3-TRIM44	intergenic_region
33	BICF2P1021569	7156183	A	G	0.100139	0.00577323	GPR128	upstream_gene_variant
5	BICF2P323747	86660476	C	A	0.410663	0.00578471	CDH8	intron_variant
33	BICF2P903863	7430038	A	G	0.233748	0.00579825	ABI3BP	intron_variant
28	BICF2P518514	7938612	G	A	0.457815	0.00580915	FRA10AC1-LGI1	intergenic_region
2	BICF2P1405306	62110938	G	A	0.466759	0.00581658	RPGRIP1L	intron_variant
2	BICF2P561901	62116651	C	G	0.466759	0.00581658	RPGRIP1L	intron_variant
13	BICF2G630663227	34652635	A	G	0.469571	0.0058241	TRAPPC9	intron_variant
35	BICF2G630770645	9316703	A	C	0.060166	0.0058395	ENSCAFG00000009631-OFCC1	intergenic_region
3	BICF2P1347925	63918740	G	A	0.5	0.00583967	LDB2-TAPT1	intergenic_region
3	BICF2P28563	63941417	A	G	0.5	0.00583967	LDB2-TAPT1	intergenic_region
3	TIGRP2P48895_rs9035989	64013828	A	G	0.5	0.00583967	LDB2-TAPT1	intergenic_region
14	BICF2G630524333	25039070	G	A	0.140582	0.00584405	NXPH1-5S_rRNA	intergenic_region
3	BICF2G630705869	33149098	G	C	0.224066	0.00586088	GABRG3-ENSCAFG00000009927	intergenic_region
18	BICF2S23452416	38916201	A	G	0.275934	0.00587258	APLNR-LRRC55	intergenic_region
8	BICF2S22935664	72118220	G	A	0.386584	0.00587664	KIF26A-U1	intergenic_region
27	BICF2P65506	22404348	A	G	0.193638	0.00588932	LRMP	intron_variant
14	BICF2P1282232	59537633	G	A	0.363762	0.00589304	FAM3C-7SK	intergenic_region
14	BICF2P336597	26636900	A	G	0.0706371	0.00589488	THSD7A	intron_variant
19	BICF2G63036229	12619947	T	A	0.0912863	0.0059099	JADE1-ENSCAFG00000030590	intergenic_region
9	BICF2G630473035	55847054	C	A	0.281466	0.0059191	FAM129B	intron_variant
13	BICF2S2418124	59978315	G	A	0.456371	0.00593326	IGJ-UTP3	intergenic_region
4	BICF2P571275	48642527	A	C	0.179115	0.00593357	5S_rRNA-U6	intergenic_region
26	BICF2G630193682	40480443	A	G	0.330567	0.00595598	0	0
1	BICF2G630713443	19828724	G	A	0.362881	0.00598	TXNL1-TCF4	intergenic_region
18	BICF2P1006041	27187128	A	G	0.224758	0.00598204	API5-7SK	intergenic_region
11	BICF2S23538318	70950276	A	G	0.322268	0.0059908	ASTN2	intron_variant
12	BICF2P302640	19265750	G	A	0.0726141	0.00599315	TFAP2B-PKHD1	intergenic_region
24	BICF2P171999	46217409	A	G	0.0809129	0.00599724	MTG2	upstream_gene_variant
1	BICF2P821978	77241018	C	G	0.410097	0.00602501	RASEF-ENSCAFG00000001457	intergenic_region
15	BICF2S23554971	66993266	A	G	0.297372	0.00604157	0	0
18	BICF2P1118130	18849635	G	A	0.359527	0.00604567	MAGI2-GNAI1	intergenic_region
10	BICF2P764482	70035931	A	C	0.148686	0.00606942	0	0
22	BICF2P981259	42497982	G	A	0.397649	0.00608973	cfa-mir-92a-1-GPC5	intergenic_region
33	BICF2P40181	14904629	G	A	0.292531	0.00609932	ENSCAFG00000010335-PVRL3	intergenic_region
1	BICF2P1020233	68735386	A	G	0.280775	0.0061	SAMD3-TMEM200A	intergenic_region
13	BICF2P1012495	22467136	C	A	0.183264	0.00610202	TMEM65	intron_variant
33	BICF2S23520934	6338002	A	G	0.470263	0.00610877	COL8A1	intron_variant
1	BICF2S23510468	66059398	A	G	0.465422	0.00611202	ECHDC1	upstream_gene_variant
4	BICF2S23134028	45057348	C	A	0.490318	0.00611599	ENSCAFG00000017180-snoZ5	intergenic_region
17	BICF2P583928	8040923	C	A	0.19018	0.00611759	ROCK2-U6	intergenic_region
9	BICF2G630832039	28053901	A	C	0.424515	0.00612271	CA10-U6	intergenic_region
29	BICF2P1212136	8228637	A	G	0.264177	0.00612297	IMPAD1-ENSCAFG00000001121	intergenic_region
8	BICF2S23411709	67524287	A	G	0.372752	0.00612606	U6-BCL11B	intergenic_region
34	BICF2P658436	43535562	A	G	0.104426	0.00613532	0	0
24	BICF2S23111818	44725977	A	G	0.0891365	0.00613905	CDH26-ENSCAFG00000012668	intergenic_region
16	BICF2S23251480	35388062	A	C	0.20816	0.00614026	PPP1R3B-ERI1	intergenic_region
18	TIGRP2P245236_rs8831615	27828362	A	G	0.423823	0.00614758	U1-LRRC4C	intergenic_region
21	BICF2G630649973	26888077	G	A	0.454986	0.00615069	ENSCAFG00000029307	downstream_gene_variant
11	BICF2G630297998	27397738	A	C	0.228216	0.00615219	ENSCAFG00000028744	downstream_gene_variant
14	BICF2P1303171	45750686	G	A	0.282158	0.00615636	BBS9-7SK	intergenic_region
5	BICF2P230747	74693521	G	A	0.331259	0.00615832	CNTNAP4	intron_variant
7	BICF2G630549455	6665635	C	G	0.421853	0.00617197	cfa-mir-29b-2-CD34	intergenic_region
2	BICF2P1240613	64112538	C	A	0.406639	0.00617521	ENSCAFG00000009731-SALL1	intergenic_region
4	BICF2S23614575	66947618	A	G	0.253804	0.00620854	ZNF131-SEPP1	intergenic_region
22	BICF2S23645851	42090268	C	A	0.338174	0.00621114	U6-cfa-mir-17	intergenic_region
24	TIGRP2P321801_rs8773519	48658145	A	C	0.361687	0.00621523	0	0
18	BICF2P958427	56024596	G	A	0.235823	0.00625072	0	0
17	BICF2G630202231	52053224	A	G	0.340249	0.0062601	U6	downstream_gene_variant
29	TIGRP2P364948_rs8699682	15089029	A	C	0.372061	0.00628544	7SK-7SK	intergenic_region
14	BICF2P182096	15151394	A	G	0.135546	0.00628689	ZNF804B	intron_variant
4	BICF2S2316808	32288857	A	G	0.494452	0.00628818	7SK-GHITM	intergenic_region
6	BICF2P421833	36310832	A	G	0.438366	0.00628832	ENSCAFG00000019087-ENSCAFG00000019089	intergenic_region
11	TIGRP2P153092_rs9229977	72049036	G	A	0.350622	0.00629766	TLR4-U6	intergenic_region
32	BICF2P902580	31297136	C	G	0.253804	0.00631864	U6-U6	intergenic_region
2	BICF2P515739	83343472	A	G	0.176349	0.00633971	ENSCAFG00000016356-ENSCAFG00000016361	intergenic_region
29	BICF2G630627902	31169148	G	A	0.369806	0.00635287	ENSCAFG00000025329-ENSCAFG00000008570	intergenic_region
29	TIGRP2P366577_rs8733185	22697790	G	A	0.142462	0.00635654	JPH1	downstream_gene_variant
4	BICF2P207891	21611653	G	A	0.142462	0.00635765	ADAMTS14	3_prime_UTR_variant
30	BICF2S23315057	9875733	A	G	0.114799	0.00635881	UBR1	intron_variant
4	BICF2P732343	37378857	A	G	0.235131	0.00637402	HRH2	downstream_gene_variant
22	BICF2P162887	52593262	A	C	0.148536	0.00637904	SLC10A2-ENSCAFG00000006015	intergenic_region
1	BICF2G630722388	41313874	A	G	0.192946	0.00638563	MTHFD1L	upstream_gene_variant
33	TIGRP2P386455_rs9030484	14964211	T	A	0.456189	0.00639258	ENSCAFG00000010335-PVRL3	intergenic_region
35	BICF2P233107	11138140	A	G	0.414127	0.00639788	NEDD9-TMEM170B	intergenic_region
5	BICF2S2308288	4122702	A	G	0.253112	0.0064137	SNX19-ADAMTS15	intergenic_region
13	BICF2S23129171	27165724	A	G	0.302213	0.0064181	ASAP1	intron_variant
18	BICF2G630691798	47603570	A	C	0.293223	0.00644915	SHANK2	intron_variant
9	BICF2G630834343	33918647	A	G	0.267313	0.0064521	YPEL2	intron_variant
16	BICF2S23415352	25664099	A	C	0.320885	0.00645704	ADAM18	intron_variant
5	BICF2P1463618	6031051	A	G	0.37621	0.00649215	FLI1-ETS1	intergenic_region
5	BICF2S2368993	6048559	A	G	0.37621	0.00649215	FLI1-ETS1	intergenic_region
15	BICF2G630421196	60457075	C	A	0.161134	0.00649639	MARCH1-ENSCAFG00000031670	intergenic_region
1	TIGRP2P6219_rs9078872	66042692	A	G	0.445367	0.00649784	ECHDC1	intron_variant
34	BICF2P451762	44837324	A	G	0.31397	0.00652046	0	0
5	BICF2S23617478	74713345	C	G	0.275242	0.00652313	CNTNAP4	intron_variant
33	BICF2G63078175	25305931	T	A	0.410788	0.00652373	CD86	intron_variant
5	BICF2P938020	90200224	A	G	0.0623188	0.00652717	0	0
13	TIGRP2P182422_rs8714571	58646804	A	C	0.277701	0.00653011	TMPRSS11B	downstream_gene_variant
24	BICF2S23347652	50625651	A	G	0.306834	0.0065458	0	0
34	BICF2P592103	19611187	G	C	0.241355	0.00655027	ST6GAL1-RTP1	intergenic_region
3	BICF2G630349762	77617467	A	G	0.347165	0.00656229	7SK-U6	intergenic_region
17	BICF2S23119569	43228434	G	A	0.502766	0.0065697	ENSCAFG00000000288-ENSCAFG00000029212	intergenic_region
34	BICF2P97204	17858687	A	G	0.103043	0.00657757	VPS8	intron_variant
35	BICF2P591613	8721610	G	A	0.105809	0.00658382	ENSCAFG00000009627-ENSCAFG00000009631	intergenic_region
5	BICF2G630238378	74862839	A	G	0.178423	0.00660628	CNTNAP4-TERF2IP	intergenic_region
21	BICF2G630653636	18143590	A	G	0.453665	0.0066102	ENSCAFG00000004649-ENSCAFG00000030498	intergenic_region
33	TIGRP2P386491_rs8755328	15032554	G	A	0.312586	0.00661987	ENSCAFG00000010335-PVRL3	intergenic_region
30	BICF2P1196880	33464996	A	G	0.0836791	0.0066252	KIF23-TLE3	intergenic_region
13	BICF2G630616465	26951845	C	A	0.368603	0.00663255	FAM49B	intron_variant
10	BICF2P164304	72073677	G	A	0.493759	0.00664219	0	0
21	BICF2P1236519	25536301	A	G	0.373269	0.00664729	ATG16L2	intron_variant
2	BICF2S23731334	43367797	A	G	0.395978	0.00668292	ANKRD55	intron_variant
24	BICF2G630495865	49839639	C	A	0.174894	0.00668625	0	0
34	TIGRP2P393750_rs8684802	13070965	A	G	0.0615491	0.00668813	USP13	intron_variant
18	BICF2S22929242	31575347	G	A	0.31397	0.00669173	C11orf74	intron_variant
7	BICF2P812247	29185277	C	A	0.133472	0.00671529	BLZF1	intron_variant
26	BICF2G630192161	41549509	A	C	0.18689	0.00672537	0	0
7	BICF2G630550972	11880907	G	A	0.392808	0.00672593	RPS6KC1-PROX1	intergenic_region
27	BICF2P1125646	25291264	A	C	0.343015	0.00674218	ABCC9	intron_variant
10	BICF2G630489934	55476870	T	A	0.118257	0.00674607	SPTBN1	intron_variant
24	BICF2P19815	46165049	A	G	0.0878285	0.00674964	LSM14B	upstream_gene_variant
14	BICF2P1414375	39851556	G	A	0.376902	0.00676126	SNX10-SKAP2	intergenic_region
29	BICF2P269179	8234232	G	A	0.255878	0.00677281	IMPAD1-ENSCAFG00000001121	intergenic_region
2	BICF2S23619683	43327691	A	C	0.178779	0.00677832	IL6ST-ANKRD55	intergenic_region
15	BICF2P105035	9167374	G	A	0.0547091	0.00678163	ZFYVE9-ENSCAFG00000028969	intergenic_region
36	BICF2S23411869	12456639	G	A	0.329184	0.00678231	ENSCAFG00000011707-B3GALT1	intergenic_region
18	BICF2P554932	57132811	G	A	0.344398	0.00678391	0	0
15	BICF2G630436505	27379596	A	C	0.0955679	0.00678633	NTS-MGAT4C	intergenic_region
15	BICF2S23238883	54143781	A	G	0.055325	0.00678862	PDGFC	downstream_gene_variant
36	BICF2P909518	33814434	G	A	0.343707	0.00682607	0	0
2	BICF2S23539893	3462032	A	G	0.329184	0.0068413	NRP1	intron_variant
36	BICF2S2322741	33800675	A	G	0.34349	0.00684635	0	0
23	BICF2P321081	29428857	A	G	0.216459	0.00685175	DNAJC13	intron_variant
21	BICF2G630649249	28411469	C	A	0.0636238	0.00685239	ENSCAFG00000024586-ENSCAFG00000006208	intergenic_region
33	BICF2P429479	3703444	G	A	0.0643154	0.00686808	ENSCAFG00000009054-ENSCAFG00000023663	intergenic_region
13	BICF2G630615044	25289212	G	A	0.244122	0.00687132	MYC-5S_rRNA	intergenic_region
30	BICF2P245175	31528118	C	A	0.12379	0.00687928	IQCH	intron_variant
22	BICF2P321978	42309679	A	G	0.224758	0.00688028	U6-cfa-mir-17	intergenic_region
12	BICF2P881659	27642141	A	G	0.408714	0.00689688	EYS-U6	intergenic_region
12	TIGRP2P161079_rs8655822	27672712	A	G	0.408714	0.00689688	EYS-U6	intergenic_region
13	BICF2S22928705	25875822	A	G	0.244813	0.00690199	MYC-5S_rRNA	intergenic_region
15	BICF2P557803	9165592	A	C	0.054785	0.00690819	ZFYVE9-ENSCAFG00000028969	intergenic_region
26	BICF2P436639	32246755	A	G	0.233057	0.0069159	U6-ZWINT	intergenic_region
34	BICF2S23615022	5945076	A	G	0.157676	0.0069228	ENSCAFG00000031045-MTRR	intergenic_region
14	BICF2P1258134	34113439	T	A	0.219686	0.00692313	TMEM196-ENSCAFG00000029642	intergenic_region
18	BICF2P32331	29103482	C	A	0.335873	0.00692774	LRRC4C-ENSCAFG00000006775	intergenic_region
2	BICF2S22910181	67333070	A	G	0.199862	0.00692827	U4	upstream_gene_variant
11	BICF2P428466	7236992	G	A	0.461272	0.0069422	SEMA6A-ENSCAFG00000000177	intergenic_region
35	BICF2G630777463	23282126	A	G	0.125864	0.00694808	LRRC16A	intron_variant
11	BICF2P79517	7245589	A	G	0.460581	0.00695668	SEMA6A-ENSCAFG00000000177	intergenic_region
4	BICF2P480873	25266352	C	G	0.336232	0.0069643	KAT6B	intron_variant
21	BICF2P321064	44627903	A	G	0.112033	0.00696625	ENSCAFG00000030945-UBE2D3	intergenic_region
17	BICF2P1157190	12575554	A	C	0.220222	0.00697766	FAM49A-RAD51AP2	intergenic_region
34	TIGRP2P402599_rs8961503	5733336	C	A	0.378285	0.00698293	ENSCAFG00000031045-MTRR	intergenic_region
14	BICF2P1353590	46404460	A	G	0.271784	0.00698794	BMPER-NPSR1	intergenic_region
6	BICF2S23551027	13078232	G	A	0.244799	0.00699382	FOXK1-SDK1	intergenic_region
1	BICF2P1476	11700116	C	G	0.250347	0.0069947	7SK-CDH7	intergenic_region
12	BICF2P327526	28583605	G	A	0.275242	0.00700108	U2-U6	intergenic_region
6	BICF2P118334	70904493	G	A	0.196676	0.00700123	ACADM-SLC44A5	intergenic_region
7	BICF2G63088115	83069953	G	A	0.326418	0.00700323	0	0
33	BICF2G630246980	10133821	G	A	0.487552	0.00700615	ENSCAFG00000009706-ENSCAFG00000025525	intergenic_region
35	BICF2S23259494	27854968	A	G	0.283541	0.0070107	0	0
3	BICF2G630106838	36848434	G	A	0.358726	0.00701606	CHRNA7	downstream_gene_variant
7	BICF2S22957003	26840883	G	A	0.0684647	0.00701949	DNM3	intron_variant
7	BICF2P306163	17378845	A	G	0.427386	0.00703636	TSEN15	intron_variant
13	BICF2G630660078	39050256	A	C	0.394515	0.00703649	TMEM33-SLC30A9	intergenic_region
7	BICF2G63086809	81816278	A	G	0.255878	0.00705952	0	0
17	BICF2G630202588	51692680	G	A	0.0878285	0.00706194	BCL2L15	3_prime_UTR_variant
21	BICF2P298053	25519304	A	G	0.315789	0.00710296	ARAP1	intron_variant
33	TIGRP2P386536_rs8710630	15219348	A	G	0.346473	0.00710723	ENSCAFG00000010335-PVRL3	intergenic_region
19	BICF2P700671	21076007	G	A	0.0560166	0.00710727	PLEKHB2-ENSCAFG00000004229	intergenic_region
10	BICF2P335835	68892966	A	G	0.227524	0.00710873	ENSCAFG00000003361	downstream_gene_variant
3	BICF2G630357943	90656425	C	A	0.143154	0.00712758	ENSCAFG00000016642-ENSCAFG00000030802	intergenic_region
33	BICF2G63079972	22484471	A	G	0.186722	0.00713261	BC040587-ENSCAFG00000001369	intergenic_region
7	BICF2P1345136	9649865	A	G	0.111496	0.00713453	KCNH1-RCOR3	intergenic_region
26	BICF2P1178647	41184067	G	A	0.0622407	0.00713943	0	0
25	BICF2S22965090	13254460	A	G	0.127939	0.00714989	ENSCAFG00000006926	intron_variant
19	BICF2G63053005	35385574	A	G	0.480636	0.00719575	GPR39	upstream_gene_variant
11	BICF2S23016228	72392904	C	A	0.20332	0.00719966	U6-BRINP1	intergenic_region
17	BICF2P200864	45827872	A	C	0.207064	0.0072337	7SK-LRRTM4	intergenic_region
16	BICF2G630850412	22917738	A	G	0.0594744	0.00723594	RNF170	intron_variant
1	BICF2P745908	16007161	G	A	0.495851	0.00723765	ENSCAFG00000000089	intron_variant
15	BICF2P1126312	55087008	A	G	0.174965	0.00724135	ENSCAFG00000027408-FAM198B	intergenic_region
6	BICF2P1171978	70878760	A	G	0.19018	0.00724646	ACADM	upstream_gene_variant
10	BICF2S23446932	10859628	G	A	0.0864454	0.00724717	NUP107	intron_variant
39	BICF2G630544495	249249	A	T	0.147507	0.00725538	0	0
22	BICF2P539828	43054087	A	C	0.116183	0.00725833	GPC5-U6	intergenic_region
12	BICF2P700318	17974528	A	G	0.372576	0.00726079	CBD111-7SK	intergenic_region
22	BICF2G630316156	8069447	A	C	0.170816	0.00726607	FAM216B	intron_variant
31	BICF2P763199	24699827	A	C	0.481328	0.00726996	GRIK1-CLDN17	intergenic_region
26	BICF2G630193699	40465092	G	A	0.409405	0.00727469	0	0
14	BICF2G630528477	41428362	A	C	0.31397	0.00728258	U6-CREB5	intergenic_region
3	BICF2P309148	13854567	A	G	0.466805	0.00731579	RHOBTB3	intron_variant
5	TIGRP2P73652_rs8754614	55419100	G	A	0.19021	0.00732354	GLIS1	intron_variant
18	BICF2P775187	29085350	A	G	0.335645	0.00732613	LRRC4C-ENSCAFG00000006775	intergenic_region
5	BICF2G630236507	90126984	A	C	0.159059	0.00733004	0	0
21	BICF2P325268	23178919	A	G	0.0746888	0.00733168	RPS3	downstream_gene_variant
12	BICF2P941307	18441810	A	G	0.434302	0.00733779	SNORA51-TFAP2D	intergenic_region
31	BICF2G630731244	11859255	A	C	0.183844	0.00734333	NRIP1	missense_variant
13	BICF2P564681	28291984	A	G	0.260719	0.00734416	ADCY8-LDHB	intergenic_region
4	BICF2P541736	21593393	A	G	0.125346	0.00735966	ADAMTS14	intron_variant
21	BICF2P731286	26434491	C	A	0.438451	0.00736492	STIM1	intron_variant
26	BICF2S23332083	39796438	A	G	0.217151	0.00736755	0	0
10	BICF2G630489205	43977659	G	A	0.26556	0.00736833	MGAT4A	intron_variant
36	TIGRP2P414358_rs8929031	27805561	A	C	0.271784	0.00737891	U6-FSIP2	intergenic_region
12	BICF2P71019	22552432	A	G	0.0912863	0.00741202	HCRTR2	intron_variant
14	TIGRP2P188020_rs8978928	20177617	C	A	0.0546335	0.007414	U6-U4	intergenic_region
9	BICF2P818748	9707377	A	G	0.387275	0.00741663	SPPL2C	upstream_gene_variant
7	BICF2G63084354	69865738	A	G	0.27455	0.00744182	ENSCAFG00000029134	upstream_gene_variant
11	BICF2G630295406	19882857	A	G	0.284232	0.00744603	ENSCAFG00000024183	intron_variant
36	BICF2S2306722	28199114	A	G	0.187414	0.00748215	FSIP2	intron_variant
4	BICF2G63058375	8802841	A	G	0.287795	0.00750624	cfa-mir-1841-U6	intergenic_region
35	BICF2G630780190	27005031	G	A	0.347645	0.00751144	0	0
29	BICF2P464536	7025364	G	A	0.451591	0.00752354	XKR4	intron_variant
24	BICF2G630509480	14691709	A	G	0.201524	0.00752945	HAO1-BMP2	intergenic_region
38	BICF2G63068867	22023605	A	G	0.129101	0.00753324	CASQ1	upstream_gene_variant
34	BICF2P1299812	10230234	A	G	0.462656	0.00753711	IRX2	intron_variant
16	BICF2G630813777	48315270	A	C	0.25831	0.00753919	7SK	upstream_gene_variant
2	BICF2P1284884	43398675	G	A	0.368603	0.00754289	ANKRD55	intron_variant
12	BICF2P500448	10599152	C	A	0.130014	0.00754909	CCND3	intron_variant
21	BICF2G630651484	20951123	C	A	0.183956	0.00755056	AAMDC	intron_variant
21	BICF2P158391	50438011	G	A	0.0726141	0.00756739	OOSP1-MS4A2	intergenic_region
12	BICF2P913841	15122617	G	A	0.387656	0.00757031	GPR116-GPR110	intergenic_region
22	BICF2S22964424	52666971	A	C	0.136238	0.00758445	ENSCAFG00000006015-5S_rRNA	intergenic_region
8	BICF2S23761984	67561062	A	G	0.385892	0.00758483	U6-BCL11B	intergenic_region
33	BICF2P1212662	7170036	G	A	0.10166	0.00761936	GPR128	intron_variant
19	BICF2S23660352	17123814	A	C	0.235131	0.00764478	SPATA5	intron_variant
8	BICF2P75882	21682375	G	A	0.210235	0.00765023	U6-FSCB	intergenic_region
21	BICF2P897328	17666873	A	C	0.24758	0.00766149	ENSCAFG00000004649-ENSCAFG00000030498	intergenic_region
12	BICF2P576444	27488091	A	G	0.422545	0.00768073	EYS-U6	intergenic_region
6	BICF2S2354522	46064414	G	A	0.484094	0.00768983	5S_rRNA-ENSCAFG00000028653	intergenic_region
19	BICF2G63046886	28191872	G	A	0.100277	0.0076915	U6-TSN	intergenic_region
14	BICF2P897558	34029707	G	A	0.361506	0.007766	TMEM196-ENSCAFG00000029642	intergenic_region
10	BICF2G630493479	71991029	G	A	0.251729	0.00777798	0	0
2	BICF2P1293516	43427464	A	T	0.396957	0.00778161	ANKRD55	intron_variant
2	BICF2S23126260	43443591	A	G	0.396957	0.00778161	ANKRD55	intron_variant
33	BICF2S23351903	28287462	A	G	0.491701	0.00778206	ZNF148	intron_variant
11	BICF2P377574	21857531	A	G	0.14592	0.00778913	FSTL4-ENSCAFG00000000971	intergenic_region
3	BICF2S23020868	66776073	A	G	0.187414	0.00779597	5S_rRNA-ENSCAFG00000015438	intergenic_region
9	BICF2S22918640	16792735	G	A	0.100277	0.00780754	ENSCAFG00000032512	downstream_gene_variant
21	BICF2S23432731	14430993	A	G	0.266252	0.00781381	TMEM126B-U6	intergenic_region
18	TIGRP2P248408_rs9234670	34198843	G	A	0.189488	0.00781681	KIAA1549L	intron_variant
22	BICF2G630336265	57219698	A	C	0.299447	0.00782934	TNFSF13B-MYO16	intergenic_region
7	BICF2G630551319	14322777	C	A	0.310942	0.00784716	XPR1	intron_variant
12	BICF2G630120274	62380847	A	C	0.114108	0.00785246	HACE1-LIN28B	intergenic_region
12	BICF2P1208970	27618351	A	G	0.262102	0.00785939	EYS-U6	intergenic_region
34	TIGRP2P397999_rs9067393	30904705	A	G	0.179115	0.00786053	ENSCAFG00000014450-BCHE	intergenic_region
21	TIGRP2P280999_rs8803074	25516008	A	C	0.266252	0.0078768	ARAP1	intron_variant
4	BICF2P771377	15756143	A	G	0.460581	0.00787871	REEP3-CTNNA3	intergenic_region
4	BICF2P771374	15756934	A	G	0.460581	0.00787871	REEP3-CTNNA3	intergenic_region
12	BICF2P962257	49787939	C	A	0.202232	0.00788114	MAP3K7-SNORD112	intergenic_region
31	BICF2G630733193	18952618	A	G	0.117729	0.0078888	ENSCAFG00000008458-7SK	intergenic_region
2	BICF2P1244496	65595913	A	G	0.160443	0.00789386	ENSCAFG00000023585-ZNF423	intergenic_region
13	BICF2P974348	39648619	G	A	0.400556	0.00790905	U4-GRXCR1	intergenic_region
10	BICF2P668033	71775550	A	C	0.115491	0.00791003	0	0
23	BICF2G630373487	35195574	A	C	0.461911	0.00795316	ENSCAFG00000007587-ENSCAFG00000030488	intergenic_region
34	BICF2G630450660	39730325	A	C	0.194329	0.00795505	NAALADL2-ENSCAFG00000015537	intergenic_region
9	BICF2G630473811	58201021	A	G	0.049101	0.00796978	OLFML2A	intron_variant
20	BICF2P308593	25264897	G	A	0.113416	0.00798579	SNORA64-ENSCAFG00000030398	intergenic_region
8	TIGRP2P115302_rs9191951	52463659	A	G	0.451591	0.00800906	SNORA31-DIO2	intergenic_region
17	BICF2G630204065	49670416	A	G	0.385201	0.0080156	NOTO-7SK	intergenic_region
17	BICF2P379966	16116963	G	A	0.25657	0.00801617	TDRD15-KLHL29	intergenic_region
17	BICF2G630218552	16126920	G	A	0.25657	0.00801617	TDRD15-KLHL29	intergenic_region
17	BICF2G630218542	16135727	A	G	0.25657	0.00801617	TDRD15-KLHL29	intergenic_region
17	BICF2G630218524	16159972	G	A	0.25657	0.00801617	TDRD15-KLHL29	intergenic_region
7	BICF2P379450	6411139	A	G	0.170124	0.00801713	CD55-ENSCAFG00000011630	intergenic_region
18	BICF2G630691458	47894920	A	G	0.0670816	0.00804295	SHANK2	intron_variant
18	BICF2S22920989	47916509	A	G	0.0670816	0.00804295	SHANK2	downstream_gene_variant
24	BICF2G630496453	45751478	G	A	0.0767635	0.00805879	CDH26-ENSCAFG00000012668	intergenic_region
14	BICF2S2372808	50924607	G	A	0.38935	0.0080669	LRRN3	upstream_gene_variant
4	BICF2S23547318	68547519	C	G	0.0713296	0.00810727	CARD6	intron_variant
3	BICF2G630701126	15710578	A	G	0.335408	0.00811841	FAM172A-ENSCAFG00000008096	intergenic_region
13	TIGRP2P177885_rs9050443	44673547	A	G	0.226141	0.00812051	OCIAD2-CWH43	intergenic_region
20	BICF2S23510370	48264265	A	G	0.104426	0.00814392	C19orf57	intron_variant
11	BICF2P767635	70385348	A	G	0.210927	0.00814714	ASTN2	intron_variant
21	BICF2P565033	48316436	A	G	0.100968	0.00815305	BDNF-U6	intergenic_region
28	TIGRP2P362346_rs8778509	41598014	A	G	0.279473	0.00817269	0	0
16	BICF2P503398	8646965	A	G	0.0539419	0.00817984	SLC37A3-KDM7A	intergenic_region
24	BICF2G630498933	34961855	G	C	0.217452	0.0081806	SULF2-PREX1	intergenic_region
22	BICF2P1068798	53866622	A	G	0.450207	0.00818262	ENSCAFG00000006015-5S_rRNA	intergenic_region
8	BICF2S23142648	69024465	G	A	0.483402	0.00819296	DLK1-Mico1	intergenic_region
21	BICF2S2345167	18403411	A	G	0.0781466	0.008196	ENSCAFG00000004649-ENSCAFG00000030498	intergenic_region
10	BICF2S23443816	23276597	A	G	0.177732	0.00819853	ENSCAFG00000029271-NDUFA6	intergenic_region
5	BICF2S23423433	6264155	A	C	0.29507	0.00821266	ETS1-U6	intergenic_region
1	BICF2G630794739	79931608	G	A	0.170816	0.00823486	ENSCAFG00000030357	intron_variant
16	BICF2G630814318	48709049	A	T	0.2213	0.00824031	7SK-SNORD22	intergenic_region
9	BICF2P1402973	50301756	G	A	0.445367	0.00824231	BRD3	intron_variant
3	BICF2P213912	91161736	C	A	0.0477178	0.00824245	ENSCAFG00000016664-ANAPC13	intergenic_region
33	BICF2P875222	3224955	A	G	0.284232	0.0082484	U6-U1	intergenic_region
38	BICF2P350302	18386084	G	C	0.163209	0.00825533	SNORD112-PBX1	intergenic_region
14	BICF2P271037	41511941	C	A	0.183264	0.00826502	CREB5	intron_variant
12	TIGRP2P168824_rs8675836	56476958	A	G	0.082296	0.00831991	7SK-POU3F2	intergenic_region
7	BICF2P455900	6353529	A	C	0.171508	0.00832036	ENSCAFG00000029002-CD55	intergenic_region
4	BICF2P1072889	11637215	A	G	0.237898	0.0083332	FAM13C-SLC16A9	intergenic_region
11	BICF2P696343	36162211	G	A	0.33241	0.00837915	CCDC171-ENSCAFG00000032301	intergenic_region
7	BICF2S23416141	25396023	A	G	0.166667	0.00839396	DARS2	intron_variant
10	BICF2G630493904	72256098	A	G	0.414246	0.00839697	0	0
33	BICF2S23712274	5936499	G	A	0.151452	0.00839804	SNORA31-SNORA20	intergenic_region
18	BICF2P1242405	55749503	G	A	0.372061	0.00842047	MS4A13	intron_variant
12	BICF2P1257432	30803382	G	A	0.472337	0.00845937	U2-ENSCAFG00000002522	intergenic_region
1	BICF2P208503	22022693	T	A	0.439142	0.00848205	DCC	intron_variant
16	BICF2G630113299	34316200	A	G	0.342324	0.00848261	ENSCAFG00000006566-ENSCAFG00000006574	intergenic_region
7	BICF2P1455884	6374082	G	A	0.170816	0.00848538	CD55	missense_variant
19	BICF2G630255452	50877342	G	A	0.296399	0.00850465	LYPD6B-ENSCAFG00000005635	intergenic_region
12	TIGRP2P165915_rs8599698	49003203	A	G	0.365837	0.00852347	MDN1	intron_variant
17	BICF2G630286114	63273884	C	A	0.398199	0.00852923	ENSCAFG00000013656-ENSCAFG00000029051	intergenic_region
26	BICF2P651786	11297336	C	A	0.477778	0.00853296	RBM19-TBX5	intergenic_region
9	BICF2P351904	24084144	G	A	0.082296	0.00853992	TBX21	intron_variant
1	BICF2G630712495	18682735	G	A	0.423928	0.00855133	ST8SIA3-WDR7	intergenic_region
6	TIGRP2P77495_rs9051517	10932750	G	A	0.0539419	0.00855778	NPTX2-BAIAP2L1	intergenic_region
13	BICF2G630660440	38400480	A	G	0.250346	0.00856134	IREB2	3_prime_UTR_variant
7	BICF2P554184	13731434	G	A	0.431535	0.00857467	QSOX1	intron_variant
4	BICF2P541620	22289850	A	G	0.0885201	0.00858307	ENSCAFG00000014229	intron_variant
3	TIGRP2P52083_rs8917637	77091309	A	G	0.405947	0.00858423	7SK-U6	intergenic_region
22	BICF2P1141674	30399251	A	G	0.192521	0.00858608	U6-KCTD12	intergenic_region
8	BICF2P1087248	66397432	A	G	0.157202	0.00859488	VRK1-ENSCAFG00000017806	intergenic_region
4	BICF2P1008386	4520061	A	G	0.185339	0.00860121	TBCE	intron_variant
4	BICF2P822399	4541926	A	G	0.185339	0.00860121	TBCE	intron_variant
34	BICF2G630461733	22435672	G	A	0.201245	0.0086095	TMEM207	intron_variant
2	BICF2P1373606	58278316	G	A	0.445983	0.00861927	GINS3-PRSS54	intergenic_region
17	BICF2P10873	50463852	A	G	0.361496	0.00863419	EXOC6B	intron_variant
11	BICF2G630306188	65052218	A	G	0.338866	0.00864477	PALM2	intron_variant
6	BICF2G630585128	33835903	C	A	0.269177	0.00864644	TMEM114-RBFOX1	intergenic_region
8	BICF2P512302	46186066	G	A	0.201936	0.00866377	DPF3-ENSCAFG00000029371	intergenic_region
9	BICF2G630829650	24084709	A	G	0.08241	0.00866417	TBX21	missense_variant
11	BICF2S22942684	50092549	C	A	0.188797	0.00868285	TMEM215-APTX	intergenic_region
7	BICF2P197355	17014237	G	A	0.421162	0.0086863	APOBEC4-RGL1	intergenic_region
33	BICF2P466299	29463543	G	A	0.42867	0.00868703	UBXN7	intron_variant
18	BICF2S22940162	27457142	G	A	0.233057	0.00869622	API5-7SK	intergenic_region
9	BICF2G630830554	25178793	G	A	0.189058	0.00870527	GIP-U6	intergenic_region
5	TIGRP2P75758_rs8645281	86699227	G	A	0.382271	0.00870707	CDH8	intron_variant
38	BICF2P1047682	21722128	A	G	0.077455	0.00873731	CD84	intron_variant
33	TIGRP2P385114_rs8713342	3167857	A	G	0.282158	0.00876253	U6-U1	intergenic_region
26	BICF2G630193707	40369168	A	G	0.172636	0.00876693	0	0
33	BICF2G630246788	9422560	A	G	0.0511757	0.00878554	ENSCAFG00000009682-ENSCAFG00000009697	intergenic_region
5	BICF2P498356	74685678	G	A	0.220222	0.00879455	CNTNAP4	intron_variant
23	BICF2S23648329	35157171	A	G	0.213693	0.0088065	ENSCAFG00000007587	downstream_gene_variant
24	BICF2P402775	38384616	A	G	0.478562	0.00881427	ZFP64-TSHZ2	intergenic_region
34	BICF2P358988	39300657	A	G	0.307746	0.00883601	NAALADL2	intron_variant
12	BICF2S23911230	12143017	T	A	0.432227	0.0088384	MRPS18A-VEGFA	intergenic_region
19	BICF2P1411618	49011437	A	G	0.25657	0.00884536	U6-ACVR2A	intergenic_region
5	BICF2S2323655	61885534	G	A	0.450831	0.00885173	RERE	intron_variant
16	BICF2P448643	25539474	A	C	0.328492	0.00885349	ENSCAFG00000005758	intron_variant
5	BICF2G630241250	71064832	A	G	0.292531	0.00886448	CENPN-CDYL2	intergenic_region
26	BICF2P414473	36015918	G	A	0.147303	0.00886763	PRKG1	intron_variant
25	BICF2S23254793	26953845	A	G	0.376731	0.0088974	5S_rRNA-XKR6	intergenic_region
17	BICF2P232259	66913380	G	A	0.414938	0.00889836	0	0
1	BICF2G630793281	82338889	A	G	0.170124	0.00890289	PCSK5	intron_variant
39	BICF2S23631059	4447909	G	A	0.363071	0.00890322	0	0
14	TIGRP2P192104_rs8918378	40504455	G	A	0.26971	0.00890471	ENSCAFG00000017837-ENSCAFG00000002977	intergenic_region
15	BICF2G630426613	55166764	A	G	0.231674	0.00892066	ENSCAFG00000027408-FAM198B	intergenic_region
26	BICF2P423872	9640849	A	G	0.0580913	0.0089307	NAA25	intron_variant
33	BICF2P1252458	30853444	A	G	0.41482	0.0089427	XXYLT1	intron_variant
14	TIGRP2P191136_rs9084518	34100296	C	G	0.133472	0.00896131	TMEM196-ENSCAFG00000029642	intergenic_region
4	BICF2S23016185	53746544	T	A	0.448133	0.00899009	SGCD-ENSCAFG00000030235	intergenic_region
1	TIGRP2P9903_rs8720884	80154354	G	A	0.40249	0.00901046	ENSCAFG00000030357-U7	intergenic_region
24	BICF2G630496440	45760146	G	A	0.0760719	0.00901749	CDH26-ENSCAFG00000012668	intergenic_region
28	BICF2G630273921	18205830	A	G	0.0691563	0.00902724	U6-U4	intergenic_region
32	BICF2P976235	11512119	G	A	0.259336	0.0090309	ABCG2	intron_variant
37	BICF2P1073273	20895729	C	A	0.395574	0.00906257	ENSCAFG00000014255	intron_variant
16	BICF2P615891	8995342	G	A	0.367911	0.00906979	TBXAS1	intron_variant
9	BICF2G630830550	25164722	A	G	0.189488	0.00907838	SNF8	upstream_gene_variant
29	BICF2P787136	10806670	G	A	0.315097	0.00909028	CA8-ENSCAFG00000012280	intergenic_region
33	BICF2G63081797	19691226	A	C	0.132964	0.00911328	GAP43	intron_variant
7	BICF2P98710	23309958	A	C	0.237898	0.00911845	ENSCAFG00000014252-RFWD2	intergenic_region
14	BICF2P801174	50645084	A	G	0.452282	0.00912827	ENSCAFG00000003294-7SK	intergenic_region
38	BICF2P927397	4614698	A	G	0.125864	0.00913766	Y_RNA-HRPT2	intergenic_region
1	BICF2P340605	67007107	A	C	0.39834	0.00914211	PTPRK	intron_variant
10	BICF2P1144785	56397557	A	G	0.173611	0.00915511	CCDC104	intron_variant
10	BICF2G630483544	33857332	G	A	0.0698479	0.00915834	CHST11-TXNRD1	intergenic_region
5	BICF2S23047309	22480182	A	G	0.488935	0.00916093	FDX1	intron_variant
16	TIGRP2P216954_rs8703961	46138508	A	G	0.441909	0.00916468	IRF2-ENPP6	intergenic_region
3	TIGRP2P37920_rs8865094	15164324	A	G	0.330567	0.00916885	KIAA0825	intron_variant
4	BICF2P260173	30569776	A	G	0.305671	0.00917123	SH2D4B-5S_rRNA	intergenic_region
24	BICF2G630499104	33989847	G	A	0.0532503	0.00918584	SLC2A10-EYA2	intergenic_region
8	BICF2S23111794	64061673	A	T	0.297372	0.00918811	DICER1-CLMN	intergenic_region
18	BICF2P899175	35228502	G	A	0.385201	0.00921301	WT1-ENSCAFG00000026663	intergenic_region
12	TIGRP2P161094_rs9037260	27749588	G	A	0.260719	0.00922079	EYS-U6	intergenic_region
12	BICF2S234316	27789564	G	A	0.260719	0.00922079	EYS-U6	intergenic_region
12	BICF2P327861	27798018	A	G	0.260719	0.00922079	EYS-U6	intergenic_region
11	BICF2G630297933	27356229	G	A	0.415629	0.0092271	TPD52L3	downstream_gene_variant
12	BICF2S23222737	27355412	A	G	0.20816	0.00924388	EYS-U6	intergenic_region
20	BICF2P294531	57720444	G	C	0.304167	0.00924648	WDR18	upstream_gene_variant
4	BICF2S23134029	45057627	A	C	0.465422	0.00924759	ENSCAFG00000017180-snoZ5	intergenic_region
37	BICF2G630133598	31100847	G	A	0.418283	0.00925624	0	0
12	BICF2P1377809	27782965	G	A	0.260055	0.0092676	EYS-U6	intergenic_region
11	BICF2S23751313	28096820	G	A	0.253112	0.00927727	KDM4C	intron_variant
35	G1470f8S105	29180907	A	C	0.224758	0.00927941	0	0
12	BICF2P596212	50563528	G	A	0.475104	0.00928252	MAP3K7-SNORD112	intergenic_region
17	BICF2P1161314	8137880	A	G	0.134163	0.00929315	U6-E2F6	intergenic_region
14	BICF2G630529912	43437836	A	C	0.12379	0.00929937	CRHR2-FAM188B	intergenic_region
1	BICF2P800052	75717747	A	G	0.0753804	0.00931969	GKAP1	intron_variant
21	BICF2G630650632	21670028	C	A	0.109155	0.00932185	CAPN5	intron_variant
17	BICF2G630212591	31807945	A	G	0.293914	0.00932704	THUMPD2-SLC8A1	intergenic_region
26	BICF2G630193836	40219879	A	G	0.118949	0.00933117	0	0
1	BICF2P416940	73284687	A	G	0.338174	0.00934617	GAS1-ZCCHC6	intergenic_region
13	BICF2P23728	38300049	G	A	0.496542	0.00934794	ENSCAFG00000030008-CHRNB4	intergenic_region
16	BICF2G630847762	18576050	A	G	0.363071	0.00934829	RBM33	intron_variant
11	BICF2P610779	36409478	G	A	0.201936	0.00935581	ENSCAFG00000032301-BNC2	intergenic_region
9	BICF2G630831361	26764743	G	A	0.311895	0.00936306	ENSCAFG00000031279-SPAG9	intergenic_region
1	BICF2S23624732	46291857	A	G	0.29668	0.00937296	U6-ARID1B	intergenic_region
1	BICF2S23759708	76329670	G	A	0.445367	0.00937854	FRMD3-RASEF	intergenic_region
16	BICF2P703901	8061189	G	A	0.327109	0.00937918	ENSCAFG00000028628-ENSCAFG00000029671	intergenic_region
16	BICF2P927791	8064610	G	A	0.327109	0.00937918	ENSCAFG00000028628-ENSCAFG00000029671	intergenic_region
12	BICF2P1191985	28499534	G	A	0.475795	0.00938704	U2-U6	intergenic_region
14	BICF2P1362860	39875514	A	G	0.323034	0.00939415	SNX10-SKAP2	intergenic_region
28	BICF2S2447764	28779828	G	A	0.33518	0.00940319	FAM204A-PRLHR	intergenic_region
33	TIGRP2P388471_rs9063975	22854799	A	G	0.248271	0.00940744	C3orf30	intron_variant
9	TIGRP2P127863_rs8684086	46560126	A	G	0.0988935	0.0094118	METTL16	intron_variant
1	TIGRP2P7200_rs8794378	71454852	G	A	0.170124	0.00942703	FANCC	intron_variant
6	BICF2P1413778	36083307	G	A	0.415512	0.00947455	ENSCAFG00000019087-ENSCAFG00000019089	intergenic_region
16	BICF2S23640682	46550714	G	A	0.363762	0.00948655	ENSCAFG00000026677	upstream_gene_variant
6	BICF2G630585553	33407763	C	A	0.318811	0.00949287	ABAT	intron_variant
26	BICF2P794566	5214650	G	A	0.248963	0.00949588	SCARB1-NCOR2	intergenic_region
22	TIGRP2P296996_rs8859922	57239297	G	A	0.391425	0.00951093	TNFSF13B-MYO16	intergenic_region
22	BICF2P276835	53985175	G	A	0.0843707	0.00951527	ENSCAFG00000006015-5S_rRNA	intergenic_region
31	BICF2G630740945	33522954	G	A	0.0622407	0.00951839	ERG	intron_variant
18	BICF2S23136721	55660718	A	G	0.289073	0.00952023	MAD2L1	intron_variant
18	BICF2G630691929	47497570	G	A	0.278008	0.00952122	SHANK2	intron_variant
13	TIGRP2P182895_rs8696302	60019614	A	G	0.298755	0.00952379	RUFY3	upstream_gene_variant
5	BICF2S22946128	86277141	A	G	0.144537	0.00952766	CDH11-CDH8	intergenic_region
13	BICF2G630611262	21025686	A	G	0.37621	0.00953318	U6-ZHX2	intergenic_region
13	BICF2P397165	51745760	G	A	0.0871369	0.00953812	U6-SNORA62	intergenic_region
28	BICF2G630270297	23524462	G	A	0.104571	0.00954776	VTI1A	intron_variant
17	BICF2S23120322	43536511	A	G	0.228907	0.00957669	ENSCAFG00000029212	intron_variant
25	BICF2S22940260	13243984	A	G	0.152355	0.00958036	ENSCAFG00000006926	upstream_gene_variant
1	TIGRP2P10049_rs9011244	80461138	G	A	0.479253	0.00958291	CEP78	intron_variant
37	BICF2P1200567	14281332	C	A	0.0940526	0.0095844	PARD3B-NRP2	intergenic_region
5	BICF2S23218924	16001655	C	A	0.180055	0.00959127	ENSCAFG00000027627-DSCAML1	intergenic_region
3	BICF2P916246	74016375	G	A	0.399032	0.00959876	KLF3-TBC1D1	intergenic_region
15	BICF2G630429767	48089733	G	A	0.0484094	0.00960002	ENSCAFG00000007865-DCLK2	intergenic_region
10	BICF2S23425562	70724149	A	G	0.298064	0.00960848	0	0
16	BICF2P257920	46135152	A	G	0.457123	0.00961071	IRF2	downstream_gene_variant
15	TIGRP2P200939_rs9152153	43206061	C	A	0.0520111	0.00961401	GYPA-HHIP	intergenic_region
34	BICF2S23031467	28160279	A	G	0.371191	0.00961834	ENSCAFG00000030237-U1	intergenic_region
19	BICF2P1388108	30805569	A	G	0.0611961	0.00962014	STEAP3-C1QL2	intergenic_region
29	BICF2S2338891	9818524	A	G	0.0739972	0.00962436	TOX	intron_variant
34	BICF2S2336106	33615133	A	G	0.390733	0.00962972	cfa-mir-551b-MECOM	intergenic_region
4	BICF2P599894	83881051	G	A	0.202628	0.00964603	ENSCAFG00000031957-CDH18	intergenic_region
1	BICF2P1302423	82398286	A	G	0.312586	0.00968142	PCSK5	intron_variant
17	BICF2P1207736	30778157	A	G	0.371369	0.0096849	GALM	intron_variant
1	TIGRP2P3982_rs8673315	57504585	G	A	0.381051	0.00968493	RFX6-VGLL2	intergenic_region
8	BICF2S23338956	68639685	A	G	0.0747922	0.0096903	WDR25	upstream_gene_variant
10	BICF2P580773	49441321	G	A	0.446058	0.00970442	CALM2-EPCAM	intergenic_region
10	BICF2P309612	49450123	A	G	0.446058	0.00970442	CALM2-EPCAM	intergenic_region
34	BICF2P115754	33502452	A	G	0.390041	0.00970679	cfa-mir-551b-MECOM	intergenic_region
2	BICF2P1467732	71345274	C	A	0.131397	0.00971751	PTPRU	missense_variant
13	BICF2P80259	8110936	A	G	0.488811	0.00971808	ANGPT1	intron_variant
34	BICF2G630453769	34954719	A	G	0.0993056	0.00973039	CLDN11-SLC7A14	intergenic_region
1	BICF2S2344007	66255159	C	A	0.483402	0.0097329	ENSCAFG00000001071-C6orf58	intergenic_region
29	BICF2P944642	8511006	A	G	0.0541667	0.00973386	IMPAD1-ENSCAFG00000001121	intergenic_region
4	BICF2G630173810	82390320	G	A	0.391425	0.00974348	ENSCAFG00000019023-CDH12	intergenic_region
12	BICF2P1373933	35133934	G	A	0.395574	0.00976741	U6-KCNQ5	intergenic_region
13	BICF2G630660137	39019288	G	A	0.401662	0.00977208	TMEM33	intron_variant
34	BICF2G630451623	37328682	G	A	0.331259	0.00977589	SPATA16-ENSCAFG00000015488	intergenic_region
18	BICF2P660897	53932040	A	G	0.425311	0.00983398	TTC9C	downstream_gene_variant
20	BICF2G630447877	54057095	A	G	0.0899032	0.00984838	ACSBG2-RFX2	intergenic_region
12	BICF2P1300123	20275272	A	C	0.204703	0.00986803	TRAM2-TMEM14A	intergenic_region
4	BICF2P1385425	25464414	G	A	0.0636238	0.00987345	VDAC2	downstream_gene_variant
12	TIGRP2P161280_rs8902946	28768423	A	G	0.401107	0.00988633	ENSCAFG00000023580-SNORA62	intergenic_region
12	BICF2S23136883	49982465	A	C	0.333333	0.00991294	MAP3K7-SNORD112	intergenic_region
12	BICF2S23136589	50013172	A	G	0.333333	0.00991294	MAP3K7-SNORD112	intergenic_region
25	BICF2P522742	21087958	G	A	0.488935	0.00992012	AADAT-U6	intergenic_region
25	BICF2P138390	21112510	A	G	0.488935	0.00992012	AADAT-U6	intergenic_region
8	BICF2P657493	47091811	A	C	0.186722	0.00992155	ENSCAFG00000016869	upstream_gene_variant
28	BICF2S23510617	28772172	G	A	0.331717	0.00993758	FAM204A-PRLHR	intergenic_region
17	BICF2G630208423	38684266	A	G	0.316044	0.0099525	ENSCAFG00000007479-KDM3A	intergenic_region
13	BICF2G630616577	27158955	A	G	0.181189	0.00995334	ASAP1	intron_variant
37	BICF2G630132522	30213367	G	A	0.461165	0.00995428	ERICH1-DLGAP2	intergenic_region
33	TIGRP2P385181_rs8694500	3370397	A	G	0.126556	0.00996055	U6-U1	intergenic_region
4	BICF2P221516	49065708	T	A	0.29872	0.00998433	GABRA1	5_prime_UTR_variant
28	BICF2G630268345	26282581	A	G	0.249654	0.00999488	ATRNL1	intron_variant

## Sheet: Weight
Table S1. List of all SNPs (p < 0.01) associated with weight that were used for gene set and pathway analysis
Chr	SNP	Position (bp)	A1	A2	Freq	p-value	Official gene name	Location
15	TIGRP2P201033_rs9187576	43493060	A	G	0.106628	1.48677e-07	HHIP	intron_variant
3	BICF2G630358507	91180492	A	G	0.471182	6.91339e-07	LCORL	intron_variant
3	BICF2G630358640	91314456	G	C	0.333815	2.10381e-06	NCAPG	intron_variant
4	BICF2S23724992	23625990	A	G	0.103746	3.99861e-06	P4HA1	intron_variant
3	BICF2S2377250	93890772	A	G	0.112392	6.65e-06	0	0
31	BICF2S2366810	40675954	C	A	0.254086	8.96e-06	0	0
23	BICF2P580549	49471629	A	G	0.269452	2.12e-05	PLCH1	intron_variant
3	BICF2G630361903	94287447	A	G	0.153458	2.93e-05	0	0
4	BICF2P1252604	17228068	A	G	0.158501	3.65e-05	REEP3-CTNNA3	intergenic_region
6	BICF2G630810040	10561492	T	A	0.0482709	3.9e-05	TRRAP	intron_variant
4	BICF2P373715	17256830	A	G	0.137608	6.17e-05	REEP3-CTNNA3	intergenic_region
4	TIGRP2P62485_rs8997727	53835202	A	G	0.319164	6.18e-05	SGCD-ENSCAFG00000030235	intergenic_region
28	BICF2G630269023	24874642	A	G	0.365274	8.45e-05	NHLRC2-ADRB1	intergenic_region
8	BICF2S23021338	21059198	G	A	0.135447	8.57e-05	LRFN5-U6	intergenic_region
21	BICF2P1267318	9687802	G	A	0.19562	9.78e-05	ENSCAFG00000025134-SNORA72	intergenic_region
7	BICF2P321194	77744350	A	C	0.476225	0.000113768	TUBB6	intron_variant
20	G1111f23S75	44421872	G	A	0.261527	0.000119193	KLHL26	intron_variant
4	BICF2S23752603	78594943	A	G	0.42147	0.000123352	U6-CDH9	intergenic_region
5	BICF2P297927	32068916	A	G	0.143372	0.000128652	SLC16A11	upstream_gene_variant
24	BICF2S23414107	13547482	A	G	0.349424	0.000134421	PLCB1	intron_variant
35	BICF2G630778876	25711203	G	A	0.17316	0.000145295	SCAND3	intron_variant
38	BICF2S23158466	26256207	G	A	0.384726	0.000157984	0	0
36	TIGRP2P416375_rs8621264	6333278	A	G	0.488473	0.000161429	RBMS1-TANK	intergenic_region
22	BICF2S23323434	25111440	G	A	0.192363	0.000172813	ENSCAFG00000004977-DACH1	intergenic_region
14	BICF2G630528861	41930890	A	G	0.115994	0.000173692	CREB5-ENSCAFG00000003014	intergenic_region
9	BICF2S23741495	43303864	A	G	0.301153	0.000180167	MYO18A	intron_variant
8	TIGRP2P108696_rs8628781	21037579	G	A	0.235591	0.000191515	LRFN5-U6	intergenic_region
28	BICF2P248390	23293899	C	G	0.402738	0.000195262	GPAM	intron_variant
28	BICF2P866757	23299686	G	A	0.402738	0.000195262	GPAM	upstream_gene_variant
19	BICF2G63037002	14012257	G	A	0.117605	0.000196207	U6-ENSCAFG00000003946	intergenic_region
3	BICF2P261621	69111456	A	G	0.138329	0.000197768	CLNK-ZNF518B	intergenic_region
11	BICF2P376563	58260706	A	G	0.215729	0.000203751	RNF20	intron_variant
30	BICF2G630409800	12322029	A	G	0.391053	0.000205466	SQRDL-7SK	intergenic_region
4	BICF2P1401401	90890804	G	A	0.113833	0.000220612	0	0
4	BICF2P42838	49249475	G	A	0.112392	0.000223502	GABRA6-GABRB2	intergenic_region
24	BICF2S23414628	13543963	A	G	0.345821	0.00025348	PLCB1	intron_variant
21	TIGRP2P290147_rs8748713	9695487	A	G	0.0951009	0.000263522	ENSCAFG00000025134-SNORA72	intergenic_region
3	BICF2G630361800	94163416	C	A	0.162104	0.000270328	0	0
15	BICF2P264795	19200741	A	C	0.273055	0.00027577	NAP1L1-BBS10	intergenic_region
3	BICF2G630340128	44622942	A	G	0.326369	0.000279749	ENSCAFG00000026734	downstream_gene_variant
14	BICF2G630521373	14016497	G	A	0.103746	0.00028117	DBF4	missense_variant
25	BICF2S23022712	42673914	A	G	0.402017	0.000298918	ENSCAFG00000031923-CAB39	intergenic_region
1	BICF2P448058	68268724	G	A	0.0497118	0.000304028	ARHGAP18-L3MBTL3	intergenic_region
5	BICF2P645758	15006237	A	G	0.135447	0.000320625	DDX6	intron_variant
14	BICF2S2333582	13930871	G	A	0.0778098	0.000321081	SLC25A40	3_prime_UTR_variant
4	BICF2P445832	36650040	G	A	0.236311	0.000326495	UNC5A-TSPAN17	intergenic_region
15	TIGRP2P196415_rs8995196	19120040	A	C	0.171717	0.000327969	ENSCAFG00000005683-PHLDA1	intergenic_region
6	BICF2P74125	15182037	G	A	0.0716353	0.00033922	MAD1L1	intron_variant
6	BICF2G630810069	10636139	A	G	0.135447	0.000341149	TRRAP	upstream_gene_variant
18	BICF2S24412094	7992883	G	A	0.305476	0.000342244	GLI3	intron_variant
11	BICF2S23229447	46819643	A	G	0.154179	0.000344405	cfa-mir-876	upstream_gene_variant
13	BICF2S23138137	42302989	A	G	0.306196	0.000349785	GABRG1-GABRA2	intergenic_region
13	BICF2P163461	42310177	G	A	0.306196	0.000349785	GABRG1-GABRA2	intergenic_region
33	BICF2G630249552	13230714	C	A	0.30303	0.000353582	BBX-CD47	intergenic_region
11	BICF2G630301668	60082577	A	G	0.111671	0.000355064	5S_rRNA-SMC2	intergenic_region
17	BICF2P1181417	48614530	A	G	0.329251	0.000362671	AUP1	synonymous_variant
5	BICF2S2329683	15842557	A	C	0.154179	0.000362913	FXYD2-ENSCAFG00000029861	intergenic_region
5	BICF2P127170	16440753	A	G	0.334055	0.000373048	PAFAH1B2	intron_variant
3	TIGRP2P46301_rs8960321	56022284	A	G	0.0864553	0.000377657	MEX3B-TMC3	intergenic_region
3	BICF2G630340127	44615782	A	G	0.263689	0.000392074	NR2F2-ENSCAFG00000026734	intergenic_region
10	BICF2S23053016	11017208	G	A	0.350144	0.000402754	CPM-CPSF6	intergenic_region
20	BICF2P850355	21597414	A	G	0.150805	0.000404563	ENSCAFG00000030627	intron_variant
1	BICF2P1035315	90591406	C	A	0.0893372	0.0004238	ENSCAFG00000001991-SMARCA2	intergenic_region
19	BICF2G63047454	28936157	A	G	0.0691643	0.000452083	TFCP2L1-7SK	intergenic_region
6	TIGRP2P78394_rs8651698	13058575	A	G	0.0965418	0.000455101	FOXK1-SDK1	intergenic_region
4	TIGRP2P62484_rs8640895	53809210	G	A	0.335735	0.000458924	SGCD-ENSCAFG00000030235	intergenic_region
21	BICF2G630659178	7329245	G	A	0.111671	0.000459076	CCDC67	intron_variant
6	BICF2P97144	8675095	T	A	0.0634006	0.000475733	MOGAT3	5_prime_UTR_variant
15	BICF2S22910375	66468536	G	A	0.191643	0.000476919	0	0
21	BICF2P1326493	13686673	A	G	0.262968	0.000484256	SYTL2	upstream_gene_variant
12	BICF2S23519255	12725009	A	G	0.490607	0.000484552	AARS2-U6	intergenic_region
34	BICF2G630461555	22633636	A	C	0.0943252	0.0004908	IL1RAP-GMNC	intergenic_region
15	BICF2G630439297	22897075	A	G	0.268939	0.000492702	PTPRQ	downstream_gene_variant
11	BICF2G630301690	60105602	A	G	0.113833	0.00051052	SMC2	intron_variant
17	BICF2G630205031	48684216	A	C	0.386067	0.000512179	RTKN	upstream_gene_variant
15	BICF2S23535762	27618470	A	C	0.21902	0.00051338	MGAT4C-ENSCAFG00000031591	intergenic_region
23	BICF2S23411957	49594860	A	G	0.349928	0.000516506	GMPS	splice_region_variant&intron_variant
7	BICF2P979272	21586876	A	G	0.367965	0.0005469	RASAL2	intron_variant
15	TIGRP2P197092_rs9150502	20687831	A	G	0.201009	0.000551361	NAV3	intron_variant
18	BICF2P803978	25620857	G	A	0.237752	0.000566414	RNH1-K-RAS	intergenic_region
17	BICF2G630217479	17873635	A	G	0.428674	0.000572244	TDRD15-KLHL29	intergenic_region
10	BICF2S23444133	8009531	C	A	0.178211	0.000573901	MSRB3	intron_variant
7	BICF2P360529	25348816	A	G	0.331412	0.000579182	ZBTB37	downstream_gene_variant
18	TIGRP2P245544_rs8819919	26304449	A	G	0.105908	0.000582096	TTC17	intron_variant
3	BICF2G630361693	93927492	A	G	0.146254	0.000603197	0	0
38	BICF2G63071552	19446111	A	G	0.0684438	0.00061281	7SK-NUF2	intergenic_region
20	BICF2P292564	34198257	G	A	0.156069	0.000618413	ERC2	intron_variant
17	BICF2P1464853	50508370	G	A	0.469741	0.000631816	EXOC6B	intron_variant
5	BICF2P830540	25199894	A	G	0.101199	0.000643595	CWF19L2-GUCY1A2	intergenic_region
33	BICF2P738028	21429812	G	A	0.092219	0.000674399	BC040587-ENSCAFG00000001369	intergenic_region
8	BICF2P447284	42017569	A	G	0.159942	0.000677611	RAD51B-7SK	intergenic_region
28	BICF2S23519370	31300481	A	T	0.486311	0.000679606	FGFR2IIIC	downstream_gene_variant
31	BICF2G630729349	9030416	C	A	0.0821326	0.000701748	ROBO1-U6	intergenic_region
18	TIGRP2P245762_rs8893806	25622208	A	T	0.241354	0.00071025	RNH1-K-RAS	intergenic_region
4	BICF2P1380852	53764613	A	G	0.327089	0.000721346	SGCD-ENSCAFG00000030235	intergenic_region
9	BICF2S23355768	36375420	A	G	0.0842939	0.000726255	ZNHIT3	upstream_gene_variant
9	BICF2P791837	36397059	A	G	0.0842939	0.000726255	MYO19	intron_variant
1	BICF2G630716201	32500480	A	G	0.17052	0.000726995	ENSCAFG00000024055-ENSCAFG00000000289	intergenic_region
20	BICF2S23519852	23676422	A	C	0.153458	0.000752617	ENSCAFG00000006583-SUCLG2	intergenic_region
1	TIGRP2P7522_rs8845605	74807859	G	A	0.118156	0.000756365	NTRK2-U6	intergenic_region
16	BICF2S23615147	14390809	A	G	0.377745	0.000761691	ZNF777	upstream_gene_variant
1	BICF2P161501	87459031	A	G	0.236311	0.000787402	MAMDC2-ENSCAFG00000028932	intergenic_region
5	BICF2P764765	15273223	G	A	0.0743146	0.000790403	KMT2A	upstream_gene_variant
8	BICF2P251707	45275582	A	G	0.172911	0.00081381	SIPA1L1-RGS6	intergenic_region
7	BICF2S23442596	77735816	G	A	0.497118	0.000824401	TUBB6	intron_variant
6	TIGRP2P77661_rs8793881	11600849	G	A	0.416427	0.000832259	CYTH3-FAM220A	intergenic_region
36	BICF2S232272	18782394	A	G	0.187959	0.00085975	CHN1	intron_variant
15	TIGRP2P203665_rs8954494	53338796	A	G	0.344428	0.000864298	GUCY1B3-ASIC5	intergenic_region
17	BICF2S23152690	13065268	A	G	0.395533	0.000864544	U4-SMC6	intergenic_region
17	BICF2G630203658	50524517	A	G	0.299712	0.000871804	EXOC6B	intron_variant
16	BICF2G630845200	14573661	G	A	0.428674	0.000876653	SSPO	intron_variant
20	BICF2S23250263	26363605	A	G	0.0612392	0.000903905	U4atac-ADAMTS9	intergenic_region
34	BICF2S22913095	5603732	G	A	0.17147	0.000919853	SEMA5A-ENSCAFG00000031045	intergenic_region
17	BICF2G630218345	16321591	G	A	0.448847	0.000928932	TDRD15-KLHL29	intergenic_region
36	TIGRP2P415709_rs8544318	32512121	G	A	0.309798	0.00094104	0	0
12	BICF2S23738775	67324322	G	A	0.0979827	0.000945534	CDK19	intron_variant
34	TIGRP2P402584_rs8838897	5620597	A	G	0.171717	0.000953837	ENSCAFG00000031045-MTRR	intergenic_region
14	BICF2P531895	42204595	A	G	0.217579	0.00095674	CPVL-CHN2	intergenic_region
33	BICF2S23632646	27918330	A	G	0.496398	0.000957667	ITGB5-MUC13	intergenic_region
4	BICF2S23016185	53746544	T	A	0.455331	0.000961504	SGCD-ENSCAFG00000030235	intergenic_region
39	BICF2G630540117	2906358	G	A	0.229107	0.000971811	0	0
3	BICF2P432596	71453898	T	A	0.190751	0.000972528	UCHL1-ENSCAFG00000007718	intergenic_region
6	BICF2P316667	69755370	A	G	0.295389	0.000977158	ST6GALNAC5	intron_variant
6	BICF2P64033	8670477	A	C	0.107349	0.000999794	MOGAT3	upstream_gene_variant
4	BICF2P492710	30591794	A	G	0.491354	0.00100063	SH2D4B-5S_rRNA	intergenic_region
20	TIGRP2P272419_rs8893890	23558530	G	A	0.377522	0.00100745	ENSCAFG00000006583-SUCLG2	intergenic_region
26	BICF2G630197048	38229090	A	G	0.054755	0.00101133	RNLS	intron_variant
9	BICF2P53257	33963114	G	A	0.337386	0.00103235	YPEL2-DHX40	intergenic_region
25	BICF2G630101746	36490277	A	G	0.134726	0.00104018	SNORD112-ENSCAFG00000022876	intergenic_region
15	BICF2P956368	53272289	A	C	0.344928	0.00104987	GUCY1B3	intron_variant
5	BICF2S235971	32959073	A	G	0.174352	0.00105492	PER1	intron_variant
32	BICF2G630594783	20632694	A	G	0.292507	0.00106043	RAP1GDS1	intron_variant
11	BICF2G630304315	63222249	A	G	0.447406	0.00106981	ENSCAFG00000026792-ACTL7B	intergenic_region
11	TIGRP2P150779_rs8716667	64481776	A	G	0.100144	0.0010719	FRRS1L-PTPN3	intergenic_region
1	BICF2S23660765	87746081	A	C	0.178674	0.00107913	PTAR1	intron_variant
4	TIGRP2P61631_rs9008725	50759830	G	A	0.0850144	0.00108685	ADRA1B-IL12B	intergenic_region
6	BICF2G630573538	57537524	A	G	0.355187	0.0010897	HFM1	downstream_gene_variant
15	BICF2S22948103	53303543	A	C	0.345101	0.00109965	GUCY1B3	intron_variant
15	BICF2P1057062	53373071	C	A	0.345101	0.00109965	ASIC5	synonymous_variant
24	BICF2S2412814	32580582	C	G	0.181097	0.00110824	CKPI-MATN4	intergenic_region
37	BICF2P218778	19425737	G	A	0.39508	0.00112462	ERBB4	intron_variant
1	BICF2S23049006	30791545	G	A	0.231988	0.00113713	NHSL1	intron_variant
6	BICF2P318271	25243730	C	G	0.134006	0.00114494	ENSCAFG00000027918-GPR139	intergenic_region
15	BICF2P130695	53238031	G	A	0.344877	0.00115632	GUCY1A3	downstream_gene_variant
32	BICF2P884434	3464308	A	G	0.47114	0.00115697	PAQR3-NAA11	intergenic_region
38	BICF2P102171	17692589	A	C	0.0799712	0.00116547	MGST3-LRRC52	intergenic_region
11	BICF2P522887	46227068	A	G	0.262248	0.00117637	5S_rRNA-cfa-mir-876	intergenic_region
8	TIGRP2P108126_rs8844954	18516221	G	A	0.412104	0.00118287	FBXO33-ENSCAFG00000008462	intergenic_region
15	BICF2P369098	25558072	G	A	0.450938	0.00118831	U6-SLC6A15	intergenic_region
34	TIGRP2P399367_rs8980962	36497251	A	G	0.488473	0.00120245	FNDC3B	intron_variant
28	BICF2S234569	28744262	A	G	0.44733	0.00121218	FAM204A-PRLHR	intergenic_region
2	BICF2P1470409	56990679	A	G	0.12464	0.00121595	ARHGEF28-ENC1	intergenic_region
7	BICF2P391679	28129316	A	G	0.170749	0.00122793	PRRX1	intron_variant
6	TIGRP2P89556_rs9065752	77060773	A	G	0.0518732	0.00123337	WLS	intron_variant
6	BICF2S23634218	67692981	A	G	0.322767	0.00123769	U4-ELTD1	intergenic_region
1	BICF2P770158	87575314	A	G	0.120317	0.00123816	ENSCAFG00000028932-C9orf135	intergenic_region
32	BICF2P964517	18031595	A	G	0.0886167	0.00125277	UNC5C	intron_variant
7	BICF2G630553087	18633179	G	A	0.48415	0.00127634	IVNS1ABP-HMCN1	intergenic_region
11	BICF2P1363557	46841479	A	G	0.100289	0.00128314	ENSCAFG00000026571	upstream_gene_variant
18	BICF2P922119	18812648	G	A	0.142651	0.00128852	MAGI2-GNAI1	intergenic_region
25	TIGRP2P330916_rs8608387	42533079	G	A	0.339337	0.00128993	SP140	downstream_gene_variant
21	BICF2S23224465	14824865	A	G	0.458934	0.00130254	U6-DLG2	intergenic_region
37	BICF2P276993	24028962	A	C	0.180836	0.00130292	TNP1-Pinc	intergenic_region
34	BICF2P1441442	6039995	G	A	0.216763	0.00131794	ENSCAFG00000031045-MTRR	intergenic_region
21	BICF2P46098	9136439	A	G	0.276734	0.00132745	ENSCAFG00000004270-ENSCAFG00000025134	intergenic_region
6	BICF2P764928	10499548	A	G	0.100865	0.00133501	SMURF1	downstream_gene_variant
24	BICF2P1369526	8214838	G	A	0.253968	0.00134217	ENSCAFG00000030939-FLRT3	intergenic_region
31	TIGRP2P376221_rs9053384	26453725	A	C	0.47114	0.00137296	TIAM1-U6	intergenic_region
36	BICF2P936625	22105511	A	G	0.307637	0.00138254	FKBP7	upstream_gene_variant
16	BICF2G630846964	17661718	G	A	0.082853	0.00138387	DPP6	intron_variant
6	BICF2P1461175	15455294	A	G	0.0569986	0.00140121	INTS1	missense_variant
35	BICF2P42970	28318287	A	G	0.397695	0.00143228	0	0
3	BICF2S23723485	88430732	A	G	0.169308	0.00144217	GPR125-KCNIP4	intergenic_region
15	BICF2P650393	21801656	A	G	0.306916	0.00144669	ENSCAFG00000005762-SYT1	intergenic_region
35	TIGRP2P409614_rs8865546	26025555	A	G	0.126801	0.00145215	ENSCAFG00000024971-ENSCAFG00000012123	intergenic_region
30	BICF2P1126419	17022159	A	G	0.449568	0.00145873	CYP19A1-GLDN	intergenic_region
2	TIGRP2P32655_rs9087042	83260976	A	G	0.110231	0.00146774	ENSCAFG00000016352-ENSCAFG00000016356	intergenic_region
8	TIGRP2P114044_rs9021170	45294465	A	G	0.149135	0.0014694	SIPA1L1-RGS6	intergenic_region
8	BICF2P437929	21835629	A	G	0.119769	0.00147686	U6-FSCB	intergenic_region
11	TIGRP2P151217_rs8854872	66255756	A	G	0.212428	0.00149906	DNAJC25	intron_variant
2	BICF2G630676606	11420854	G	A	0.228386	0.0015017	MLLT10	intron_variant
6	BICF2S23449922	24875516	G	A	0.217579	0.00152524	ENSCAFG00000024109	intron_variant
1	BICF2G630718970	36778795	C	G	0.229532	0.00153628	ENSCAFG00000000327-EPM2A	intergenic_region
14	BICF2G630528708	41797269	A	G	0.401297	0.00153977	CREB5	intron_variant
3	BICF2P759838	88291044	T	A	0.242795	0.00154103	GPR125-KCNIP4	intergenic_region
20	BICF2P1451331	40886541	G	A	0.367435	0.00154672	ENSCAFG00000029616-MAP4	intergenic_region
2	BICF2P267812	66005696	A	C	0.268012	0.00155185	CBLN1-N4BP1	intergenic_region
1	TIGRP2P2428_rs8625534	47630748	A	C	0.145864	0.00155293	SERAC1	intron_variant
26	BICF2P914293	24218052	A	G	0.283862	0.00155601	LIMK2	intron_variant
5	BICF2S23014586	25892221	A	G	0.17316	0.00155606	MRPS36-ENSCAFG00000001472	intergenic_region
21	TIGRP2P279181_rs8600841	10989372	A	T	0.426513	0.00156468	GRM5	intron_variant
5	BICF2P552783	76906234	G	A	0.349928	0.00156568	ENSCAFG00000020167	synonymous_variant
9	TIGRP2P127016_rs9016932	43494535	G	A	0.148415	0.00158062	NUFIP2-TAOK1	intergenic_region
7	TIGRP2P98448_rs9253405	52186912	G	A	0.119597	0.00158797	U6-KIAA1328	intergenic_region
21	BICF2P43564	9130125	A	G	0.275937	0.00159211	ENSCAFG00000004270-ENSCAFG00000025134	intergenic_region
11	BICF2P1376345	47127398	C	A	0.101585	0.00162415	ENSCAFG00000026571-ENSCAFG00000001731	intergenic_region
18	BICF2P415260	8046328	A	G	0.412104	0.00163968	GLI3	intron_variant
3	BICF2P733834	88055521	C	A	0.152958	0.00164108	GPR125-KCNIP4	intergenic_region
4	BICF2P69592	25850929	G	A	0.378066	0.00164787	ZNF503-C10orf11	intergenic_region
36	BICF2G630766314	5031771	A	G	0.211816	0.00164803	ENSCAFG00000009377	downstream_gene_variant
11	BICF2P427368	71590374	A	G	0.204185	0.00165122	TLR4-U6	intergenic_region
20	BICF2P882643	34465722	A	C	0.149135	0.00165716	ERC2	intron_variant
6	TIGRP2P81457_rs8691370	35999162	G	A	0.356628	0.00166548	ENSCAFG00000019087-ENSCAFG00000019089	intergenic_region
6	BICF2P1381179	11605114	G	C	0.351852	0.00167584	CYTH3-FAM220A	intergenic_region
20	TIGRP2P273525_rs8705404	27715862	G	A	0.252882	0.00168149	SYNPR	intron_variant
7	BICF2G630565078	65760114	A	G	0.322046	0.00168431	ENSCAFG00000018233-ENSCAFG00000018235	intergenic_region
8	BICF2P1158678	17063335	A	G	0.328676	0.00170372	ENSCAFG00000028068-SNORA5	intergenic_region
21	BICF2P406311	10569609	A	C	0.310519	0.00170668	ENSCAFG00000006666	upstream_gene_variant
4	BICF2P1431787	71630098	C	G	0.490607	0.00171631	NIPBL	intron_variant
33	TIGRP2P390665_rs9000628	33999762	A	G	0.247839	0.00171876	0	0
21	TIGRP2P289917_rs8584874	8522887	A	C	0.185426	0.00174008	FAT3-ENSCAFG00000004270	intergenic_region
18	BICF2P425749	24913361	A	G	0.304035	0.00174701	ENSCAFG00000031180-SEPT14	intergenic_region
11	BICF2P1069611	64364460	G	A	0.117435	0.00175182	FRRS1L	intron_variant
34	BICF2P56495	11847785	A	C	0.395382	0.00176101	AHRR	intron_variant
8	BICF2P307999	19717977	G	A	0.065562	0.00176499	LRFN5-U6	intergenic_region
3	BICF2G630352603	80801257	G	A	0.223913	0.00177218	ENSCAFG00000016344-U1	intergenic_region
24	BICF2P1292599	22785586	T	A	0.0597983	0.00177761	CBFA2T2	intron_variant
24	BICF2S23241658	22787217	A	G	0.0597983	0.00177761	CBFA2T2	intron_variant
24	BICF2S23241659	22787263	G	A	0.0597983	0.00177761	CBFA2T2	intron_variant
24	BICF2S24117809	22797494	G	A	0.0597983	0.00177761	CBFA2T2	intron_variant
15	BICF2G630439970	21124417	A	G	0.145022	0.00178334	NAV3-ENSCAFG00000005762	intergenic_region
33	BICF2P1135209	5486209	C	A	0.0597983	0.00180769	CPOX-ENSCAFG00000028564	intergenic_region
24	BICF2S2296211	16147186	A	G	0.32853	0.00181786	C20orf196-GPCPD1	intergenic_region
19	BICF2P996871	4796775	A	G	0.220058	0.0018241	SLC7A11-ENSCAFG00000003755	intergenic_region
1	BICF2S23523128	87599280	A	G	0.136888	0.00182976	C9orf135	intron_variant
3	BICF2G630355260	88470055	C	A	0.299133	0.00183397	GPR125-KCNIP4	intergenic_region
24	TIGRP2P311971_rs8578093	19065717	A	G	0.451729	0.00183599	PDYN-ENSCAFG00000025524	intergenic_region
13	BICF2S2314086	42609816	A	G	0.496398	0.00184379	GABRA2-GABRA4	intergenic_region
34	TIGRP2P402637_rs8709506	5835424	A	G	0.395533	0.00185104	ENSCAFG00000031045-MTRR	intergenic_region
8	BICF2P133211	27254634	A	G	0.262968	0.00185341	PYGL	intron_variant
15	BICF2P889046	58234140	G	A	0.0576369	0.00186134	FSTL5	intron_variant
4	BICF2P614182	74235196	G	A	0.167147	0.00186834	TARS	intron_variant
20	BICF2P894202	23897194	A	G	0.0662824	0.00188968	ENSCAFG00000006583-SUCLG2	intergenic_region
4	BICF2P1385425	25464414	G	A	0.0597983	0.00192056	VDAC2	downstream_gene_variant
12	TIGRP2P161320_rs8749083	28944618	C	G	0.0648415	0.00192941	ENSCAFG00000023580-SNORA62	intergenic_region
21	BICF2S23217413	41037080	A	G	0.064121	0.00193502	SPTY2D1	intron_variant
28	BICF2G630267520	27367623	G	A	0.185159	0.00195425	HSPA12A-ENO4	intergenic_region
28	BICF2G630267504	27374422	A	G	0.185159	0.00195425	HSPA12A-ENO4	intergenic_region
12	BICF2P1393408	67169508	A	G	0.177954	0.00196349	SLC22A16-CDK19	intergenic_region
15	BICF2P262224	53248398	A	G	0.336455	0.00197115	GUCY1A3-GUCY1B3	intergenic_region
15	BICF2S23238125	53287510	A	G	0.336455	0.00197115	GUCY1B3	intron_variant
15	TIGRP2P203637_rs8672515	53302373	G	A	0.336455	0.00197115	GUCY1B3	intron_variant
15	BICF2S23527645	53326757	A	G	0.336455	0.00197115	GUCY1B3-ASIC5	intergenic_region
20	BICF2P528863	27958801	A	C	0.287464	0.00197551	SYNPR-CADPS	intergenic_region
15	BICF2P1014000	53411245	G	A	0.350649	0.00197792	TDO2	missense_variant
10	BICF2S23129706	7966915	G	A	0.474026	0.00197799	MSRB3	intron_variant
7	TIGRP2P93872_rs9240447	28109255	G	A	0.161383	0.0019843	PRRX1	intron_variant
11	BICF2P292180	46860855	G	A	0.49928	0.00199179	ENSCAFG00000026571-ENSCAFG00000001731	intergenic_region
7	TIGRP2P95182_rs9171688	38637905	G	A	0.413545	0.00199769	LIN9	intron_variant
23	TIGRP2P306119_rs8492617	42427976	A	G	0.18804	0.0020123	7SK-ZIC4	intergenic_region
16	BICF2S2334185	10809297	A	G	0.264409	0.00202324	CREB3L2-DGKI	intergenic_region
16	BICF2S2334964	10812242	G	A	0.264409	0.00202324	CREB3L2-DGKI	intergenic_region
11	BICF2P93273	36328834	A	C	0.229827	0.00203805	ENSCAFG00000032301-BNC2	intergenic_region
23	BICF2P843643	24736732	A	G	0.0936599	0.00204213	SATB1-ENSCAFG00000027514	intergenic_region
24	BICF2G630510330	13648877	C	A	0.215418	0.0020438	PLCB1-TMX4	intergenic_region
17	BICF2G630205084	48668243	A	C	0.322977	0.00205186	WBP1	downstream_gene_variant
35	TIGRP2P408632_rs8749061	22715679	G	A	0.458934	0.00206273	ACOT13	intron_variant
17	BICF2P452200	48128665	G	A	0.0707071	0.0020694	TACR1	intron_variant
1	BICF2G630791014	87058588	A	G	0.12464	0.0020783	TRPM3-KLF9	intergenic_region
9	BICF2S24317651	58402907	A	G	0.135447	0.00208054	NR6A1	intron_variant
11	BICF2P221070	47153895	G	A	0.263006	0.00208161	ENSCAFG00000026571-ENSCAFG00000001731	intergenic_region
15	BICF2P1314960	53260054	A	G	0.336941	0.00208331	GUCY1A3-GUCY1B3	intergenic_region
23	BICF2G630364259	52454062	T	A	0.128242	0.00208412	0	0
34	TIGRP2P402820_rs8985928	6261145	A	G	0.195245	0.00208554	ADCY2	intron_variant
6	BICF2P699862	14845203	G	A	0.327089	0.00210303	SNX8	intron_variant
3	BICF2G630340121	44592607	A	C	0.444524	0.00211032	NR2F2-ENSCAFG00000026734	intergenic_region
7	BICF2S23547289	77740012	A	G	0.254323	0.00212695	TUBB6	intron_variant
25	BICF2G630465361	19622266	A	G	0.141931	0.00213505	CBR4	upstream_gene_variant
5	BICF2S23058014	32531966	G	A	0.41474	0.00215014	SAT2	downstream_gene_variant
28	BICF2G630271608	21855809	A	G	0.366715	0.0021565	SNORA65	downstream_gene_variant
28	BICF2P513614	34938085	A	G	0.271614	0.00215976	EDRF1	downstream_gene_variant
6	TIGRP2P81978_rs8491947	38402424	A	C	0.0533141	0.00216789	PRSS27	downstream_gene_variant
5	BICF2P1132921	15920920	A	C	0.126263	0.00217126	ENSCAFG00000029861-ENSCAFG00000027627	intergenic_region
36	BICF2G630766852	3962121	A	G	0.5	0.00217756	U6-U6	intergenic_region
9	BICF2G630835753	37047450	G	A	0.377583	0.00219266	ACACA	intron_variant
35	BICF2P698960	11758460	A	G	0.173631	0.00222191	HIVEP1-EDN1	intergenic_region
29	BICF2S2417496	20062065	A	T	0.175793	0.0022253	XKR9-EYA1	intergenic_region
15	BICF2G630443369	14067340	A	G	0.0706052	0.00222879	NSUN4	intron_variant
21	BICF2P493874	48388824	A	G	0.404179	0.00223657	BDNF-U6	intergenic_region
23	BICF2G630362669	53903867	A	C	0.0541126	0.00225052	0	0
38	TIGRP2P424167_rs8800283	16171469	C	A	0.466859	0.00225086	U6-DUSP10	intergenic_region
11	BICF2S22940978	45308680	G	C	0.117435	0.00225094	TEK	intron_variant
23	BICF2G630369003	48082370	C	A	0.252882	0.00225107	U6-ARHGEF26	intergenic_region
7	BICF2P435072	15706159	G	A	0.26912	0.00225157	ZNF648-GLUL	intergenic_region
11	BICF2P703163	47020382	G	A	0.0691643	0.00226476	ENSCAFG00000026571-ENSCAFG00000001731	intergenic_region
1	BICF2G630714480	21128662	A	G	0.147695	0.00226506	ENSCAFG00000030508	upstream_gene_variant
13	BICF2G630608621	15791207	A	G	0.452381	0.00226532	ENSCAFG00000027644-EIF3H	intergenic_region
18	TIGRP2P245548_rs8976311	26297357	A	G	0.162003	0.00228114	TTC17	upstream_gene_variant
29	BICF2G630631308	34999040	A	G	0.24928	0.00228404	ENSCAFG00000008943-ENSCAFG00000008955	intergenic_region
8	BICF2P732946	19654869	A	G	0.0662824	0.00228551	LRFN5-U6	intergenic_region
16	BICF2S23730630	10831859	A	G	0.286023	0.00230373	DGKI	intron_variant
23	BICF2G630373007	37032395	C	A	0.158009	0.00230511	SPSB4	intron_variant
34	BICF2P279607	6017293	G	A	0.463977	0.00232399	ENSCAFG00000031045-MTRR	intergenic_region
5	BICF2S23642432	14853533	G	A	0.243516	0.00232806	FOXR1	intron_variant
18	BICF2P332267	27741983	G	C	0.116715	0.00233809	U1-LRRC4C	intergenic_region
3	BICF2P692472	86437117	A	G	0.324928	0.00234178	PPARGC1A-GBA3	intergenic_region
9	BICF2G630836496	38556854	G	A	0.393218	0.00234966	ENSCAFG00000030750-ENSCAFG00000018340	intergenic_region
1	BICF2S23742416	60435549	A	C	0.0691643	0.00235083	U4-ENSCAFG00000030746	intergenic_region
3	BICF2G630340083	44551778	A	T	0.487013	0.00235117	NR2F2-ENSCAFG00000026734	intergenic_region
4	BICF2P1256627	36478620	G	A	0.229827	0.0023532	HK3	intron_variant
11	BICF2P1218201	55452657	G	A	0.301873	0.00235365	TBC1D2	intron_variant
19	BICF2P1151337	13998398	G	A	0.335014	0.00235476	U6-ENSCAFG00000003946	intergenic_region
38	BICF2S23655544	17889697	G	A	0.313131	0.00235493	RXRG	intron_variant
21	BICF2P187978	11003717	G	A	0.43804	0.00236112	GRM5	intron_variant
3	BICF2P648682	69127226	A	G	0.314121	0.00236342	ZNF518B	downstream_gene_variant
31	BICF2P403553	28808342	A	G	0.342713	0.0023714	ENSCAFG00000031162	missense_variant
8	BICF2P878533	8114716	A	G	0.456052	0.00237835	ENSCAFG00000012522-ENSCAFG00000012527	intergenic_region
5	BICF2S23056870	32535803	A	G	0.414265	0.00241226	SAT2	missense_variant
18	TIGRP2P240301_rs8864461	18796770	A	G	0.153458	0.00241278	MAGI2-GNAI1	intergenic_region
12	BICF2S23338638	28194934	C	A	0.472543	0.00242481	U6	upstream_gene_variant
29	BICF2P1117471	20093636	A	G	0.342029	0.00244955	XKR9-EYA1	intergenic_region
1	BICF2S23450850	52273892	A	C	0.224784	0.00245933	QKI-HNRNPDL	intergenic_region
8	BICF2P225614	9395879	A	G	0.495677	0.00247369	PRKD1-ENSCAFG00000012573	intergenic_region
34	BICF2G630452943	35593097	A	G	0.152017	0.00248809	TNIK	intron_variant
11	BICF2S23725001	42029569	G	A	0.20245	0.0024979	DMRTA1-ELAVL2	intergenic_region
33	BICF2S23259853	17025081	A	G	0.121481	0.00250628	BTLA-ENSCAFG00000010493	intergenic_region
11	BICF2P215738	47994938	G	A	0.353026	0.00250863	U6-U4	intergenic_region
14	BICF2G630521338	13976343	A	G	0.0706052	0.00253311	SLC25A40	intron_variant
14	BICF2G630521364	14004493	A	G	0.0706052	0.00253311	DBF4	intron_variant
36	BICF2P716913	27624549	T	A	0.262248	0.00255802	ZNF804A-U6	intergenic_region
17	BICF2G630218209	16435966	G	A	0.23487	0.00257099	TDRD15-KLHL29	intergenic_region
11	BICF2P356029	65917384	G	A	0.21026	0.00257179	LPAR1-OR2K2	intergenic_region
8	TIGRP2P117016_rs9099713	9788878	G	A	0.458213	0.00257443	PRKD1-ENSCAFG00000012573	intergenic_region
7	BICF2P556304	32733376	C	A	0.410663	0.00257471	RGS7-FH	intergenic_region
8	BICF2P216464	54938047	A	T	0.435065	0.00258365	5S_rRNA-U6	intergenic_region
1	BICF2P222704	87167823	T	A	0.100865	0.00261417	KLF9-SMC5	intergenic_region
5	BICF2S23334044	85188767	G	A	0.0461095	0.00263179	CDH11-CDH8	intergenic_region
24	BICF2G630509944	14148172	G	A	0.270563	0.00263629	TMX4	intron_variant
30	BICF2P1129102	17736057	C	A	0.431556	0.00265547	MAPK6	synonymous_variant
31	BICF2P272953	4116126	A	G	0.230159	0.00265734	ENSCAFG00000032194-ENSCAFG00000029014	intergenic_region
11	BICF2P168227	47126350	G	A	0.162824	0.00266169	ENSCAFG00000026571-ENSCAFG00000001731	intergenic_region
20	BICF2P992882	34582805	G	A	0.417147	0.00266496	ERC2	intron_variant
26	BICF2P40990	41244246	G	A	0.173631	0.00268503	0	0
17	BICF2G630218734	15978569	A	C	0.305476	0.00273399	TDRD15	upstream_gene_variant
1	BICF2S2369384	65275897	A	G	0.487032	0.00274076	U6-ENSCAFG00000001064	intergenic_region
5	BICF2P958242	63057251	A	C	0.146377	0.00274169	CTNNBIP1	intron_variant
1	TIGRP2P1012_rs8515774	30745856	A	G	0.24928	0.00275597	NHSL1	stop_gained
5	BICF2P945533	54606497	A	G	0.362392	0.00276449	ACOT11-SSBP3	intergenic_region
28	BICF2G630272409	20039037	A	G	0.463256	0.00278074	U4-XPNPEP1	intergenic_region
2	BICF2P339253	83195413	A	G	0.0910405	0.00280696	ENSCAFG00000016352-ENSCAFG00000016356	intergenic_region
10	BICF2P635077	8082416	A	G	0.144813	0.00281039	MSRB3-ENSCAFG00000022943	intergenic_region
35	BICF2S23751626	15390982	A	G	0.351585	0.00283668	MYLIP-GMPR	intergenic_region
5	BICF2G630239639	72956060	C	A	0.0662824	0.00284577	WWOX	intron_variant
12	BICF2P1368233	23547966	G	A	0.138528	0.00285079	COL21A1-U6	intergenic_region
1	BICF2P626276	35081504	G	A	0.248559	0.00286014	FUCA2-ENSCAFG00000032743	intergenic_region
20	BICF2P1353278	26680721	C	A	0.314121	0.00286076	ADAMTS9	intron_variant
30	BICF2S23613770	11144771	A	G	0.29755	0.00286144	CTDSPL2	intron_variant
26	BICF2P1508585	36301531	A	C	0.418588	0.00286725	CSTF2T-ENSCAFG00000023425	intergenic_region
20	BICF2G630445226	60376823	A	G	0.2	0.00287685	0	0
25	BICF2G630156959	52945368	A	G	0.386067	0.00287927	0	0
4	TIGRP2P68168_rs8614672	89349404	A	G	0.0611354	0.00288515	0	0
34	BICF2G630449802	40781700	A	G	0.481988	0.00290682	TBL1XR1-ENSCAFG00000026532	intergenic_region
15	BICF2G630443632	12655786	A	C	0.124803	0.00290945	SLC5A9	intron_variant
34	TIGRP2P401871_rs8674418	44619969	C	A	0.259366	0.00292343	0	0
12	BICF2P413065	24317672	A	G	0.260837	0.00293639	ZNF451	intron_variant
3	BICF2S23355278	69995706	G	A	0.484513	0.00294005	STX18-MSX1	intergenic_region
9	BICF2G630474858	59996893	A	G	0.0792507	0.00294797	OR5C1-ENSCAFG00000020257	intergenic_region
35	BICF2P490333	22730684	A	C	0.455331	0.00295788	C6orf62	intron_variant
7	BICF2P509591	21897620	G	A	0.365994	0.00296287	SEC16B-BRINP2	intergenic_region
28	BICF2G630269027	24869962	G	A	0.415192	0.00297079	NHLRC2-ADRB1	intergenic_region
23	TIGRP2P300779_rs8701610	18102142	G	A	0.373016	0.0030047	NGLY1	3_prime_UTR_variant
14	BICF2G630529818	43233751	A	G	0.413545	0.00301094	NOD1-GGCT	intergenic_region
32	TIGRP2P378721_rs8776366	12719791	A	G	0.337025	0.00301949	ENSCAFG00000009864-ENSCAFG00000029213	intergenic_region
13	BICF2P1072241	50235136	T	A	0.336941	0.00302393	ENSCAFG00000002336-ENSCAFG00000002337	intergenic_region
29	BICF2P1141660	17564065	G	A	0.35879	0.00303029	PREX2	intron_variant
15	BICF2P1438625	53425192	G	A	0.341499	0.00303286	TDO2	downstream_gene_variant
6	BICF2P34631	13997258	G	A	0.106061	0.00304536	SDK1-CARD11	intergenic_region
11	BICF2P822019	46880198	G	A	0.15873	0.00305732	ENSCAFG00000026571-ENSCAFG00000001731	intergenic_region
6	BICF2S23660302	37448483	G	A	0.29611	0.00306223	CREBBP	intron_variant
32	BICF2S23624518	30229529	G	A	0.191643	0.00308661	ELOVL6	intron_variant
28	BICF2G630268912	25034623	A	G	0.0806916	0.00309228	TDRD1	intron_variant
20	BICF2S233364	51589888	A	C	0.0607815	0.00309534	ENSCAFG00000030274-ENSCAFG00000023619	intergenic_region
36	BICF2S23738844	33490187	G	A	0.18804	0.00309545	0	0
17	BICF2P308386	48478656	A	G	0.462536	0.00310465	SEMA4F	3_prime_UTR_variant
38	BICF2G63067240	25461376	A	G	0.163545	0.00311924	0	0
12	BICF2P337717	23535318	C	A	0.139049	0.00312877	COL21A1-U6	intergenic_region
29	BICF2G630632471	36277625	G	A	0.104467	0.00312936	NECAB1	intron_variant
35	BICF2P1280527	11610103	A	G	0.14049	0.00313584	HIVEP1	intron_variant
29	BICF2P1133982	21831497	C	A	0.273775	0.00313864	ENSCAFG00000008012-U6	intergenic_region
35	BICF2S2306637	13147875	A	C	0.137608	0.00314046	RANBP9	intron_variant
8	BICF2P1096387	18498334	A	G	0.350865	0.00314769	FBXO33-ENSCAFG00000008462	intergenic_region
11	BICF2S22963829	36305350	G	A	0.34438	0.00315423	ENSCAFG00000032301-BNC2	intergenic_region
6	TIGRP2P77677_rs8519218	11608766	A	G	0.342713	0.00317183	CYTH3-FAM220A	intergenic_region
1	BICF2P1364159	90583868	A	G	0.0713256	0.00318331	ENSCAFG00000001991-SMARCA2	intergenic_region
1	BICF2P1385937	89459991	G	A	0.145743	0.00320432	DOCK8-KANK1	intergenic_region
1	BICF2P1298214	52138249	G	A	0.324207	0.00321007	QKI-HNRNPDL	intergenic_region
20	BICF2S23542015	25522461	A	G	0.0972622	0.00321072	ENSCAFG00000030398-ENSCAFG00000006722	intergenic_region
20	BICF2S2399921	51542485	C	A	0.0626801	0.00323349	ZNF317-U6	intergenic_region
12	BICF2P643547	34387812	G	A	0.315562	0.0032342	RIMS1	splice_region_variant&intron_variant
28	BICF2P114685	35369286	C	A	0.464697	0.00324425	ADAM12	intron_variant
11	BICF2P350522	58274682	G	A	0.227666	0.00324564	RNF20	downstream_gene_variant
25	BICF2G630466089	18642466	T	A	0.264834	0.0032499	RNF17	intron_variant
4	BICF2S232671	18120230	C	A	0.331412	0.00326579	CTNNA3	intron_variant
31	BICF2P977455	34122407	A	G	0.383285	0.00326586	BRWD1	3_prime_UTR_variant
3	BICF2G630361787	94159014	G	A	0.142651	0.00328431	0	0
29	BICF2G630632824	36768810	G	A	0.0857349	0.00328919	SLC26A7-RUNX1T1	intergenic_region
25	BICF2P882309	44037153	A	G	0.305476	0.00329101	DIS3L2	intron_variant
7	BICF2P1348825	20921590	A	G	0.0605187	0.0032933	RALGPS2	intron_variant
15	BICF2P883681	38697098	G	A	0.367435	0.00330697	ANKS1B	intron_variant
6	TIGRP2P85743_rs8643382	9066007	A	G	0.140693	0.0033146	TFR2	intron_variant
15	BICF2P151230	20861265	A	G	0.299855	0.00333352	NAV3	intron_variant
6	BICF2P1430225	11608900	G	A	0.342939	0.00333948	CYTH3-FAM220A	intergenic_region
6	BICF2S2296995	11616418	A	G	0.342939	0.00333948	CYTH3-FAM220A	intergenic_region
28	BICF2G630265335	35630771	A	C	0.157061	0.00334962	C10orf90	intron_variant
16	BICF2P940040	33310906	G	A	0.12987	0.00335553	PURG	intron_variant
5	BICF2P1187669	79090831	A	C	0.279942	0.00335624	ZFHX3-PSMD7	intergenic_region
20	BICF2P1394766	44400207	A	G	0.337176	0.00335962	KLHL26	downstream_gene_variant
5	TIGRP2P75970_rs8603400	87777661	A	G	0.401297	0.00336259	CDH8-ENSCAFG00000028545	intergenic_region
20	BICF2P1423766	34594689	A	G	0.461816	0.00336396	ERC2-WNT5A	intergenic_region
4	BICF2G630172002	80714000	G	A	0.355908	0.00336879	7SK-CDH10	intergenic_region
20	BICF2G630228060	6304592	A	G	0.352092	0.00338089	NUCB1-ENSCAFG00000004994	intergenic_region
7	BICF2G630552509	17833487	C	G	0.146974	0.00338597	C1orf21	intron_variant
17	TIGRP2P233558_rs8623446	50270959	G	A	0.339337	0.00339343	EXOC6B	intron_variant
21	BICF2G630657593	11572735	A	G	0.356628	0.00340045	GRM5-ENSCAFG00000004384	intergenic_region
21	BICF2G630657607	11547161	A	G	0.35951	0.00340119	GRM5-ENSCAFG00000004384	intergenic_region
6	BICF2S23016168	24866755	G	A	0.186599	0.00341887	ENSCAFG00000024109	intron_variant
25	BICF2G630100998	35673365	A	G	0.156566	0.00341892	GFRA2-5S_rRNA	intergenic_region
17	BICF2S23756541	3287888	G	A	0.0699856	0.00342908	U1-U6	intergenic_region
6	BICF2P242526	71594911	A	G	0.0785303	0.00343926	LHX8-TYW3	intergenic_region
24	BICF2G630499066	34843657	C	A	0.372294	0.00344177	SULF2-PREX1	intergenic_region
6	BICF2P822850	14010081	C	A	0.114327	0.00345497	SDK1-CARD11	intergenic_region
1	BICF2P653927	87584256	G	A	0.105187	0.00346334	ENSCAFG00000028932-C9orf135	intergenic_region
21	BICF2G630654640	15332349	A	G	0.0612392	0.0034714	DLG2	intron_variant
11	BICF2S23022653	60366483	G	A	0.285303	0.00348206	ENSCAFG00000002674-U6	intergenic_region
19	BICF2G630256607	49418569	A	G	0.376081	0.00348372	U6-ACVR2A	intergenic_region
4	BICF2P573769	25567534	G	A	0.308081	0.00348925	COMTD1-ZNF503	intergenic_region
11	BICF2G630303060	61985844	A	G	0.139653	0.00349108	TMEM38B-ZNF462	intergenic_region
17	BICF2P539598	3395551	A	G	0.0692641	0.00349186	U6-ENSCAFG00000028777	intergenic_region
1	BICF2P298988	87710489	G	A	0.0770893	0.00349506	PTAR1	intron_variant
17	BICF2P1373759	3325164	A	G	0.0698847	0.00349561	U1-U6	intergenic_region
17	BICF2P191625	3348304	A	G	0.0698847	0.00349561	U1-U6	intergenic_region
13	BICF2S23327747	51914355	A	G	0.392651	0.00354976	SNORA62-U6	intergenic_region
11	BICF2G630304531	63408987	A	G	0.363242	0.00355331	ENSCAFG00000026792-ACTL7B	intergenic_region
19	BICF2P233163	42512867	A	G	0.396974	0.00355828	LRP1B	intron_variant
4	BICF2P666014	12032400	A	T	0.396552	0.00356976	CCDC6	intron_variant
1	BICF2G630708633	8075592	A	C	0.0972622	0.00358255	ENSCAFG00000000035	upstream_gene_variant
19	BICF2G63036980	13995428	A	G	0.266571	0.00358514	U6-ENSCAFG00000003946	intergenic_region
9	BICF2G630474517	59273775	G	A	0.188761	0.00358599	DENND1A	intron_variant
6	TIGRP2P81992_rs9139791	38481317	G	A	0.390332	0.00361532	PDPK1-ENSCAFG00000019360	intergenic_region
14	BICF2P1062280	42253356	C	A	0.110951	0.00361581	CHN2	intron_variant
6	BICF2P520673	13990813	G	A	0.106628	0.00362061	SDK1-CARD11	intergenic_region
4	BICF2S23618684	82822268	A	G	0.113833	0.00362949	CDH12	intron_variant
13	BICF2S23222210	42456241	C	A	0.381124	0.00363099	GABRA2	intron_variant
17	TIGRP2P233003_rs9245724	48121204	A	G	0.146974	0.00363655	TACR1	intron_variant
17	BICF2G630205509	48105009	A	G	0.0792507	0.00364588	TACR1	intron_variant
29	BICF2G630635590	41713471	A	G	0.315751	0.00365239	MTDH	intron_variant
21	BICF2G630657979	11006275	A	C	0.214286	0.00367036	GRM5	intron_variant
11	BICF2P998323	52533862	G	A	0.154179	0.00367643	RECK	intron_variant
10	BICF2P484831	7987200	G	A	0.428674	0.00367708	MSRB3	intron_variant
5	BICF2P906919	12990799	G	A	0.419308	0.00368415	TBCEL	intron_variant
22	BICF2G630326533	29524254	G	A	0.381844	0.0036856	LMO7	intron_variant
4	BICF2G630172200	80879548	G	A	0.152738	0.00368938	7SK-CDH10	intergenic_region
13	BICF2G630746086	64676365	A	G	0.360231	0.00373351	0	0
5	BICF2S23655756	60063887	A	G	0.0756484	0.00373414	CHD5	intron_variant
6	BICF2P436603	36008867	A	G	0.339337	0.00375537	ENSCAFG00000019087-ENSCAFG00000019089	intergenic_region
5	BICF2P573035	60029234	A	G	0.0770893	0.00377507	CHD5	downstream_gene_variant
5	BICF2S22929699	60049801	G	A	0.0770893	0.00377507	HES2	downstream_gene_variant
12	BICF2P1283564	27497776	A	G	0.395533	0.00378081	EYS-U6	intergenic_region
8	BICF2P1084483	54764133	G	A	0.351585	0.00378392	5S_rRNA-5S_rRNA	intergenic_region
7	BICF2P1064543	77751430	A	G	0.498559	0.00378791	AFG3L2	intron_variant
1	G61f40S219	87963670	G	A	0.15634	0.00380434	APBA1	intron_variant
30	BICF2G630403406	27169743	G	C	0.287572	0.00380527	ENSCAFG00000024545-TLN2	intergenic_region
16	BICF2S23454118	58191772	A	G	0.205331	0.00380866	U6-MCPH1	intergenic_region
14	TIGRP2P187165_rs8583101	17221929	A	G	0.0652174	0.00382972	FZD1-MTERF	intergenic_region
9	BICF2S2314648	63486227	A	G	0.35879	0.00383443	0	0
21	BICF2G630642466	49105358	G	A	0.399856	0.00385166	U6-U6	intergenic_region
11	BICF2P411826	47395809	A	G	0.113276	0.00387466	ENSCAFG00000001731-ENSCAFG00000001734	intergenic_region
30	BICF2P743607	11615578	C	G	0.258646	0.00389111	SHF-U6	intergenic_region
11	BICF2P276238	72945483	A	C	0.103746	0.00389754	BRINP1-RPL7	intergenic_region
23	TIGRP2P304978_rs8887826	37148088	G	A	0.201729	0.00390481	SPSB4-ACPL2	intergenic_region
28	BICF2S23340306	31290669	G	A	0.444444	0.00390495	WDR11-FGFR2IIIC	intergenic_region
15	BICF2P105070	22306163	A	G	0.477666	0.00390704	PPP1R12A	intron_variant
19	TIGRP2P268190_rs9104148	46909187	A	G	0.326369	0.00392524	VIS1-U6	intergenic_region
5	BICF2G63035363	32397199	A	G	0.434971	0.00392877	ENSCAFG00000024667	upstream_gene_variant
14	BICF2G630528033	40535558	C	A	0.314841	0.00393569	ENSCAFG00000017837-ENSCAFG00000002977	intergenic_region
21	BICF2S22928393	44309779	G	C	0.403319	0.00394359	GAS2	intron_variant
34	BICF2P135711	9932001	G	A	0.427233	0.00395275	IRX1-IRX2	intergenic_region
5	BICF2P546213	26142906	A	C	0.493304	0.00397005	ENSCAFG00000001472-AASDHPPT	intergenic_region
11	BICF2S23346186	37128421	A	G	0.497839	0.00397106	ENSCAFG00000032537-CNTLN	intergenic_region
7	BICF2S23020309	52286125	A	C	0.179395	0.00398837	U6-KIAA1328	intergenic_region
1	TIGRP2P11586_rs9190884	88988431	A	C	0.459654	0.00399571	PGM5	missense_variant
8	BICF2P886427	21819953	A	G	0.146974	0.0040055	U6-FSCB	intergenic_region
7	BICF2P1088803	20833557	G	A	0.412104	0.00400804	FAM20B-RALGPS2	intergenic_region
26	BICF2P224373	27339111	A	T	0.250364	0.00402256	ENSCAFG00000031196-ENSCAFG00000015176	intergenic_region
14	BICF2S23124676	47306071	A	T	0.420749	0.00402871	HERPUD2-SEPT7	intergenic_region
13	BICF2S2377246	55320186	A	G	0.189755	0.00403615	TECRL	intron_variant
13	BICF2G630608052	15123308	G	A	0.326369	0.00405377	TRPS1	intron_variant
31	BICF2S23314845	15738875	G	A	0.432997	0.00405664	U6-U6	intergenic_region
3	BICF2G630356455	89623082	A	G	0.106628	0.00405686	RPL7A-ENSCAFG00000016642	intergenic_region
25	BICF2S23728316	15287882	G	A	0.270331	0.0040605	SACS	missense_variant
30	BICF2S23440312	35363080	A	G	0.114553	0.00406708	THSD4-MYO9A	intergenic_region
4	TIGRP2P57026_rs8641993	3116383	A	G	0.198127	0.00408452	RYR2-MTR	intergenic_region
14	BICF2S23030953	55473926	C	A	0.414986	0.00408725	CAV1	intron_variant
13	BICF2S23331765	46152604	A	G	0.321326	0.00409462	LNX1	intron_variant
2	BICF2P653439	84451162	A	G	0.17219	0.00410257	MTHFR	intron_variant
5	BICF2P549810	20415213	A	G	0.0939306	0.00411165	NCAM1-U4	intergenic_region
36	BICF2P355341	15579739	A	G	0.448127	0.00412472	TLK1	intron_variant
17	BICF2G630205680	47981175	A	G	0.221182	0.00413714	EVA1A-ENSCAFG00000026547	intergenic_region
31	BICF2G630738116	27515748	A	G	0.463256	0.00414475	C31H21orf62-OLIG2	intergenic_region
6	BICF2P816740	30669336	A	G	0.331412	0.0041463	SNX29	intron_variant
21	BICF2P282441	46378324	G	A	0.177954	0.0041512	ENSCAFG00000001197-U6	intergenic_region
22	BICF2S2368084	56803810	C	A	0.138329	0.0041612	ENSCAFG00000029765-ENSCAFG00000005316	intergenic_region
8	TIGRP2P108121_rs8746115	18508812	A	G	0.372478	0.00416925	FBXO33-ENSCAFG00000008462	intergenic_region
1	BICF2P709806	120441349	C	A	0.355187	0.00417726	TSHZ3	intron_variant
4	BICF2S2358412	67578011	A	C	0.394092	0.00421405	ENSCAFG00000023056-FBXO4	intergenic_region
6	BICF2P642986	10516282	A	C	0.286265	0.00422233	ENSCAFG00000015164	synonymous_variant
17	BICF2G630205276	48470904	A	C	0.236652	0.00422864	SEMA4F	downstream_gene_variant
10	BICF2P221274	65970655	A	G	0.274815	0.00423617	MEIS1-ENSCAFG00000026704	intergenic_region
4	BICF2P882300	50773540	A	G	0.0799712	0.0042419	ADRA1B-IL12B	intergenic_region
32	BICF2P678955	10818704	A	G	0.0615051	0.00424868	SPARCL1	downstream_gene_variant
16	BICF2P953037	39814802	A	G	0.173631	0.00425828	U6-ENSCAFG00000031006	intergenic_region
15	BICF2P360394	38551281	G	A	0.32853	0.00425872	ANKS1B	intron_variant
21	BICF2G630658532	9711224	A	G	0.347983	0.00426426	ENSCAFG00000025134-SNORA72	intergenic_region
13	BICF2G630609340	16807766	A	G	0.237032	0.00426707	SLC30A8-MED30	intergenic_region
24	TIGRP2P311319_rs9246586	15001812	A	G	0.265512	0.00427179	HAO1-BMP2	intergenic_region
12	TIGRP2P163310_rs8800105	36710790	G	A	0.402738	0.00427606	ENSCAFG00000002667-COL12A1	intergenic_region
31	BICF2S23053387	31715794	C	A	0.164265	0.00427881	CLDN14-SIM2	intergenic_region
10	BICF2P136377	65943806	A	G	0.231988	0.00428166	MEIS1-ENSCAFG00000026704	intergenic_region
10	BICF2P497221	65955312	G	A	0.231988	0.00428166	MEIS1-ENSCAFG00000026704	intergenic_region
6	BICF2P1175380	8891211	G	A	0.183983	0.004286	TRIP6	downstream_gene_variant
15	BICF2P689284	52779481	G	A	0.314121	0.00429181	RBM46-ENSCAFG00000008476	intergenic_region
6	BICF2S23652505	10762282	A	G	0.131844	0.00429507	TMEM130-NPTX2	intergenic_region
7	BICF2P810214	29780253	G	A	0.0792507	0.00430389	ENSCAFG00000027887-DPT	intergenic_region
7	BICF2P464381	32744200	A	G	0.478386	0.00432308	RGS7-FH	intergenic_region
31	BICF2G630731874	13718896	A	T	0.262968	0.00432573	U6-ENSCAFG00000031557	intergenic_region
12	TIGRP2P156834_rs8791406	12567352	A	C	0.172911	0.00432879	TMEM63B	synonymous_variant
12	BICF2P645563	68587326	A	G	0.466138	0.00433986	LAMA4	intron_variant
6	BICF2S23217563	66095723	A	G	0.447826	0.00434048	U6-U12	intergenic_region
37	BICF2P769377	25376314	G	C	0.110951	0.00434797	CYP27A1	intron_variant
14	BICF2P1150712	47535448	G	A	0.291066	0.00435509	SEPT7-EEPD1	intergenic_region
4	BICF2G630172806	81496331	G	A	0.231214	0.00436027	ENSCAFG00000019017-ENSCAFG00000019023	intergenic_region
1	BICF2G630719454	37363764	A	G	0.21645	0.00436086	GRM1	intron_variant
3	BICF2G630355828	88989230	G	A	0.369597	0.00436743	SLIT2	intron_variant
10	BICF2P1265074	59524313	G	A	0.350434	0.00437269	FANCL-BCL11A	intergenic_region
9	BICF2G630836158	37765579	G	A	0.074928	0.00438271	ENSCAFG00000031869	intron_variant
1	BICF2P1016191	88981351	A	G	0.476912	0.00438708	PGM5	intron_variant
4	BICF2S22912580	18610924	G	A	0.25	0.00438759	LRRTM3-ENSCAFG00000024412	intergenic_region
27	BICF2S23410943	42251847	A	C	0.105339	0.00439779	IQSEC3	intron_variant
15	BICF2S23229037	66299884	G	A	0.246398	0.00439854	0	0
7	BICF2P1436700	25733140	G	A	0.329251	0.00440233	PRDX6-TNFSF4	intergenic_region
19	BICF2S23534670	12583172	G	A	0.126801	0.00442005	JADE1-ENSCAFG00000030590	intergenic_region
36	BICF2P1181603	16192796	A	G	0.256223	0.00442067	SLC25A12	intron_variant
7	BICF2P278276	15565575	A	G	0.380403	0.00442216	ZNF648-GLUL	intergenic_region
12	BICF2P887512	42273911	A	G	0.165706	0.00442771	FAM46A	3_prime_UTR_variant
34	BICF2P1190726	5962412	A	T	0.465368	0.00446702	ENSCAFG00000031045-MTRR	intergenic_region
6	BICF2P977588	36770244	G	A	0.0943804	0.00447246	MGRN1-UBALD1	intergenic_region
4	BICF2S23728918	88164665	A	G	0.301153	0.00448105	ANKH	intron_variant
12	TIGRP2P160335_rs9096705	24207899	G	C	0.161383	0.00448548	BEND6	intron_variant
12	TIGRP2P170620_rs9184414	64911803	A	G	0.432997	0.00449299	SCML4	intron_variant
35	BICF2P1392238	28051040	A	G	0.227666	0.00449626	0	0
18	BICF2P568627	10001548	G	A	0.143786	0.00450248	Y_RNA-U6	intergenic_region
18	BICF2G630690502	49336559	A	C	0.147695	0.00450476	PPP6R3	intron_variant
29	BICF2G630632855	36788113	G	A	0.0945166	0.00451249	SLC26A7-RUNX1T1	intergenic_region
16	BICF2P1287095	47597290	A	G	0.342219	0.00451623	TENM3	intron_variant
21	BICF2P1113480	11583526	A	C	0.330692	0.00451737	GRM5-ENSCAFG00000004384	intergenic_region
28	BICF2P917904	16325572	G	A	0.272334	0.00452254	SLK	intron_variant
11	BICF2P1343522	58347609	A	G	0.207071	0.00453356	GRIN3A	intron_variant
11	BICF2S23330011	54029961	A	G	0.169308	0.00454898	FRMPD1	intron_variant
12	BICF2P624104	12731690	C	A	0.262248	0.00457225	U6	downstream_gene_variant
17	BICF2G630222514	10929277	A	G	0.0504323	0.00457786	ENSCAFG00000028075-NBAS	intergenic_region
17	BICF2G630222484	11004874	G	A	0.0504323	0.00457786	ENSCAFG00000028075-NBAS	intergenic_region
36	BICF2S23228234	28678080	C	A	0.389769	0.00461028	FSIP2-ZC3H15	intergenic_region
5	BICF2P1364834	11709571	A	G	0.110951	0.00462017	UBASH3B-cfa-mir-99a-2	intergenic_region
33	BICF2S23448778	12387777	G	A	0.448127	0.0046405	CBLB-ENSCAFG00000027807	intergenic_region
28	BICF2P238890	41937074	G	A	0.337176	0.00464943	0	0
16	BICF2G630114647	35974623	A	G	0.448773	0.00467952	ENSCAFG00000025394-ENSCAFG00000006745	intergenic_region
34	BICF2P326497	5613889	A	G	0.0504323	0.00468131	ENSCAFG00000031045	downstream_gene_variant
3	TIGRP2P49969_rs8871623	68454861	A	G	0.125541	0.0046843	3OST1-CLNK	intergenic_region
7	BICF2G630550026	10373593	A	G	0.270173	0.00468736	DTL-PPP2R5A	intergenic_region
9	BICF2G630836268	37936717	A	G	0.065562	0.00469944	RASL10B	upstream_gene_variant
21	BICF2G630659164	7339400	A	C	0.190202	0.00470705	CCDC67-SLC36A4	intergenic_region
4	BICF2G630175986	85205146	A	G	0.159222	0.00471972	CDH18-SNORA62	intergenic_region
26	BICF2P227304	25436480	A	G	0.378963	0.00472108	ENSCAFG00000024720	intron_variant
3	BICF2G630361725	93970062	A	C	0.146465	0.00473654	0	0
4	BICF2P712893	51293540	A	G	0.189481	0.00473914	RNF145	intron_variant
16	BICF2G630843394	12074287	A	G	0.204611	0.00474517	ENSCAFG00000030652-U6	intergenic_region
7	BICF2S23041291	18622814	A	G	0.149135	0.00475786	IVNS1ABP-HMCN1	intergenic_region
36	TIGRP2P416162_rs8711127	5145590	A	G	0.469697	0.00476171	BAZ2B	intron_variant
20	BICF2P491073	27801466	A	G	0.348703	0.00476245	SYNPR	intron_variant
14	BICF2P743485	49851902	C	A	0.427954	0.00477046	SNORD116-ENSCAFG00000003294	intergenic_region
4	BICF2S23311792	15973961	C	A	0.100865	0.00478471	REEP3-CTNNA3	intergenic_region
14	BICF2P1362481	32079457	G	A	0.262248	0.00478606	ENSCAFG00000002452-ENSCAFG00000002455	intergenic_region
32	BICF2P928136	26978204	G	A	0.172911	0.00478645	TBCK	intron_variant
28	BICF2P912171	33528472	A	C	0.220461	0.0047873	CPXM2	intron_variant
16	BICF2P1299193	19819303	A	G	0.484848	0.00479855	ENSCAFG00000005174	intron_variant
20	BICF2P768103	28595379	C	A	0.409942	0.00480182	CADPS	intron_variant
32	BICF2P1146448	29132178	G	A	0.168588	0.00480627	COL25A1	intron_variant
28	BICF2G630265491	35466860	A	G	0.411765	0.00482431	ADAM12	intron_variant
12	TIGRP2P156941_rs9154550	12707475	G	A	0.204052	0.00483343	TCTE1	upstream_gene_variant
12	BICF2P874306	42627990	G	A	0.164493	0.00483769	FAM46A-IBTK	intergenic_region
9	BICF2G630836177	37779346	A	G	0.064121	0.00483816	CCL14	upstream_gene_variant
9	BICF2G630836211	37813264	C	G	0.064121	0.00483816	CCL5	upstream_gene_variant
9	BICF2G630836219	37825061	G	A	0.064121	0.00483816	C17orf66	5_prime_UTR_variant
5	BICF2P1310468	87780446	G	A	0.43732	0.00484635	CDH8-ENSCAFG00000028545	intergenic_region
15	BICF2G630416990	67131920	A	G	0.399135	0.00484714	0	0
1	BICF2S23712293	51775979	A	G	0.0670029	0.00484725	ENSCAFG00000000770-QKI	intergenic_region
3	TIGRP2P55431_rs9116380	88893816	A	G	0.186599	0.00485591	PACRGL	downstream_gene_variant
1	BICF2S22925266	100633549	A	G	0.478355	0.00487323	ENSCAFG00000031784	upstream_gene_variant
6	TIGRP2P80294_rs9255675	22128687	A	C	0.332612	0.00487831	CHP2	3_prime_UTR_variant
1	BICF2P503349	120434952	A	G	0.190751	0.00488457	TSHZ3	intron_variant
29	BICF2S23245248	34747168	A	G	0.341499	0.00488608	U6-ENSCAFG00000008943	intergenic_region
21	BICF2S23746000	14071457	A	G	0.15562	0.00489878	TMEM126B-U6	intergenic_region
5	BICF2G630182500	34032870	A	G	0.175325	0.00490175	STX8	intron_variant
18	BICF2P857729	46544094	A	G	0.210375	0.00491071	KCNQ1	intron_variant
2	BICF2P294415	36400275	A	G	0.31268	0.00491449	PCDHGC5	intron_variant
29	BICF2G630630528	34245357	A	G	0.384006	0.00491554	MMP16-ENSCAFG00000029124	intergenic_region
24	BICF2P490445	30156007	A	G	0.378242	0.00493115	PTPRT	intron_variant
1	BICF2P823389	87532748	A	G	0.0677233	0.00493276	ENSCAFG00000028932-C9orf135	intergenic_region
21	BICF2S22924022	11064519	G	A	0.45245	0.0049336	GRM5	intron_variant
8	BICF2P991250	11136911	G	A	0.115274	0.00493454	ENSCAFG00000029524-ARHGAP5	intergenic_region
7	BICF2S23043416	55750174	A	C	0.252193	0.00495275	NOL4	intron_variant
34	BICF2G630452949	35579182	A	G	0.194084	0.00496783	TNIK	intron_variant
30	BICF2G630401652	29015321	A	G	0.134006	0.00497169	ZNF609	intron_variant
5	BICF2S22938380	8897619	G	A	0.354467	0.00497386	CHEK1	intron_variant
6	BICF2P908268	13951377	A	G	0.430836	0.00498767	SDK1-CARD11	intergenic_region
17	BICF2G630204636	49054471	A	G	0.427233	0.00499862	TET3	intron_variant
6	BICF2S23347682	68256055	A	T	0.118156	0.00501101	ELTD1-U6	intergenic_region
29	BICF2G630630994	34767711	A	G	0.271614	0.00501279	U6-ENSCAFG00000008943	intergenic_region
33	BICF2G630247621	11079553	A	G	0.425793	0.00502827	ENSCAFG00000026602	downstream_gene_variant
38	TIGRP2P424571_rs9029826	18485459	A	G	0.126801	0.00503107	PBX1	intron_variant
21	BICF2G630654260	15704857	G	A	0.358696	0.00503406	DLG2	intron_variant
32	BICF2G630599285	9618701	A	G	0.0684438	0.00503831	MAPK10	missense_variant
32	BICF2G630599277	9620862	C	G	0.0684438	0.00503831	MAPK10	intron_variant
8	BICF2P89175	56086088	C	A	0.429395	0.00504095	U6-ENSCAFG00000017323	intergenic_region
18	BICF2P1267876	9996030	A	G	0.143372	0.00504149	Y_RNA-U6	intergenic_region
1	TIGRP2P4962_rs9134723	61382157	G	A	0.431556	0.00504708	ENSCAFG00000000960-U6	intergenic_region
12	BICF2P171841	17582614	G	A	0.45245	0.00505333	CRISP2	intron_variant
33	BICF2G630246650	9200532	G	A	0.105908	0.00506086	7SK-ENSCAFG00000009682	intergenic_region
11	BICF2G630307429	73932576	G	A	0.39121	0.00506255	ENSCAFG00000032755	intron_variant
17	BICF2S23239183	65030832	C	G	0.340318	0.00506924	0	0
12	BICF2P831678	8418935	A	G	0.167867	0.00506986	KIF6	intron_variant
26	BICF2S2368845	20461129	A	G	0.0914986	0.00507626	MIAT_exon5_3-ENSCAFG00000026840	intergenic_region
15	BICF2G630443418	13950232	A	C	0.10951	0.00507871	DMBX1-ENSCAFG00000004242	intergenic_region
13	BICF2P601033	60482461	G	A	0.0698847	0.00507998	SLC4A4	intron_variant
31	BICF2P1176740	32560801	C	A	0.466859	0.0050891	DYRK1A	upstream_gene_variant
2	BICF2P1305300	41573503	A	G	0.179395	0.00509185	PPP2R2B-STK32A	intergenic_region
13	BICF2G630610300	19748127	A	G	0.32853	0.00512454	ENSCAFG00000000961-5S_rRNA	intergenic_region
12	BICF2P706785	66147357	G	A	0.235591	0.00514159	CEP57L1-ENSCAFG00000029315	intergenic_region
11	BICF2P1293369	46216701	A	G	0.210678	0.00514299	5S_rRNA-cfa-mir-876	intergenic_region
4	BICF2S22938930	19241111	A	G	0.402738	0.0051433	HERC4	intron_variant
22	TIGRP2P297829_rs8506459	59922111	A	C	0.134921	0.00514673	SOX1-ENSCAFG00000031412	intergenic_region
4	BICF2G63057780	8258918	A	G	0.139049	0.00518812	TRIM67	synonymous_variant
10	BICF2P509550	62526738	G	A	0.277378	0.00520945	EHBP1	intron_variant
21	BICF2S23715114	10214449	C	A	0.247118	0.00521114	NAALAD2	intron_variant
26	BICF2P509571	27030275	G	A	0.373919	0.00521889	ENSCAFG00000032706-ENSCAFG00000013587	intergenic_region
1	BICF2P1068000	103588996	A	G	0.289322	0.00522165	ENSCAFG00000002723	intron_variant
21	BICF2G630658090	10617241	G	A	0.316282	0.00522628	NOX4	intron_variant
20	BICF2P908983	34132662	A	G	0.12718	0.00523653	ERC2	intron_variant
31	BICF2S23537847	27290589	G	A	0.0911722	0.00524032	C21orf59	downstream_gene_variant
7	BICF2P1268962	20862189	A	G	0.440115	0.00524223	FAM20B-RALGPS2	intergenic_region
12	BICF2P257319	66786263	T	A	0.0918836	0.00524514	GPR6-WASF1	intergenic_region
5	BICF2P1182500	26923050	A	G	0.261527	0.00524577	GRIA4-CASP4	intergenic_region
6	BICF2S23729890	11375391	T	A	0.17219	0.00524634	ENSCAFG00000015477	intron_variant
23	BICF2G630379357	26492544	A	G	0.0958213	0.00526945	OXNAD1	intron_variant
7	BICF2P1220643	14965844	A	C	0.332357	0.00527022	CACNA1E	intron_variant
1	BICF2P872985	23005626	C	A	0.0842939	0.00527553	DCC-ENSCAFG00000030017	intergenic_region
4	BICF2P56204	57227595	G	A	0.488473	0.00529856	NMUR2-GLRA1	intergenic_region
16	BICF2P1442214	39950156	A	G	0.206772	0.00532628	U6-ENSCAFG00000031006	intergenic_region
12	TIGRP2P161562_rs8916539	30006646	A	G	0.427746	0.00533402	U2-ENSCAFG00000002522	intergenic_region
34	BICF2P940082	4101768	A	G	0.0808081	0.00534536	FAM173B-7SK	intergenic_region
5	BICF2S23650339	8849907	C	A	0.376623	0.00534755	ACRV1	intron_variant
1	BICF2G630790065	97351649	A	G	0.426513	0.0053662	SPIN1	downstream_gene_variant
30	BICF2S23315057	9875733	A	G	0.110231	0.00537866	UBR1	intron_variant
31	BICF2P798072	10412312	A	G	0.148415	0.00538127	ENSCAFG00000007980-ENSCAFG00000007984	intergenic_region
6	BICF2S2316921	29604620	A	G	0.213256	0.00538699	ENSCAFG00000031194-ENSCAFG00000029951	intergenic_region
33	BICF2P962554	11990211	G	A	0.394092	0.00538722	CBLB-ENSCAFG00000027807	intergenic_region
6	BICF2P85413	73141149	A	G	0.45671	0.00538986	7SK-NEGR1	intergenic_region
14	BICF2S2372933	35071338	C	A	0.111111	0.00539317	ABCB5-U6	intergenic_region
5	BICF2P94109	34157574	G	A	0.302309	0.00542974	USP43	intron_variant
1	BICF2S2294062	75615522	A	G	0.204611	0.00543033	KIF27	intron_variant
6	BICF2S22919682	70389307	G	A	0.40634	0.00543358	ST6GALNAC3-ASB17	intergenic_region
13	BICF2G630608012	15099980	G	A	0.260086	0.00544263	TRPS1	intron_variant
20	BICF2S23712145	10478031	A	G	0.159913	0.00544279	GRM7	intron_variant
1	BICF2P555035	64617175	G	A	0.223343	0.00545589	U6-HEY2	intergenic_region
1	BICF2P989675	64623878	A	G	0.223343	0.00545589	U6-HEY2	intergenic_region
28	BICF2P971747	9316343	A	G	0.118876	0.00546527	ENSCAFG00000008439	intron_variant
30	BICF2G630408536	20100103	A	G	0.455331	0.0054766	UNC13C	downstream_gene_variant
17	TIGRP2P230298_rs9212829	39375293	G	A	0.142651	0.00547919	ENSCAFG00000031333-SFTPB	intergenic_region
31	BICF2P509053	38754331	A	G	0.147908	0.0054825	ADARB1	intron_variant
21	BICF2G630658743	8053888	G	A	0.306196	0.00548278	FAT3	intron_variant
11	BICF2S23159756	36283882	G	A	0.279326	0.00549289	ENSCAFG00000032301-BNC2	intergenic_region
13	BICF2S23624321	52474635	C	A	0.394092	0.00550868	U6-ENSCAFG00000032523	intergenic_region
4	BICF2G630172752	81475566	G	A	0.161616	0.00550938	ENSCAFG00000019017-ENSCAFG00000019023	intergenic_region
12	BICF2P1326357	26266309	C	A	0.195245	0.00551267	KHDRBS2-ENSCAFG00000002473	intergenic_region
1	BICF2P259582	65110552	G	A	0.23487	0.00551391	TRMT11-CENPW	intergenic_region
28	BICF2P505231	28412591	A	G	0.0886167	0.00553302	RAB11FIP2	downstream_gene_variant
18	BICF2P1333141	27636108	T	A	0.354467	0.00553535	7SK-U1	intergenic_region
15	BICF2G630443401	13961032	G	A	0.0994236	0.00553995	DMBX1-ENSCAFG00000004242	intergenic_region
25	BICF2S23135796	48992407	G	A	0.35879	0.00555019	ASB1-TWIST2	intergenic_region
4	BICF2P908208	40401547	A	G	0.219741	0.00555833	FBXW11-SMIM23	intergenic_region
1	BICF2P1234455	87170654	A	C	0.119597	0.00556134	KLF9-SMC5	intergenic_region
17	BICF2P340384	39412459	G	A	0.154401	0.00556688	ENSCAFG00000031333-SFTPB	intergenic_region
20	BICF2P462156	32754282	G	A	0.263689	0.00557067	SLMAP-ENSCAFG00000027611	intergenic_region
7	BICF2P484843	48885877	A	G	0.0619597	0.00558339	ENSCAFG00000017739	upstream_gene_variant
12	G731f67S101	24593050	A	C	0.259019	0.00558682	PRIM2	intron_variant
9	BICF2P947825	29904024	A	G	0.119597	0.00561021	U6-7SK	intergenic_region
1	BICF2P582972	65149894	A	G	0.237374	0.00561157	TRMT11-CENPW	intergenic_region
1	BICF2P302670	65889367	A	G	0.417749	0.00561536	RSPO3	intron_variant
32	BICF2G630594572	20818457	A	G	0.256484	0.00561723	TSPAN5	intron_variant
18	BICF2P111891	48735682	G	A	0.231268	0.00561934	CCND1-TPCN2	intergenic_region
18	TIGRP2P255169_rs9193849	48737133	G	A	0.231268	0.00561934	CCND1-TPCN2	intergenic_region
18	BICF2P578328	48773543	C	A	0.231268	0.00561934	CCND1-TPCN2	intergenic_region
12	BICF2P293983	29078487	A	G	0.0533141	0.00563106	ENSCAFG00000023580-SNORA62	intergenic_region
11	BICF2G630304317	63222505	G	A	0.348703	0.00563109	ENSCAFG00000026792-ACTL7B	intergenic_region
33	BICF2P238800	15605908	A	G	0.402597	0.00563127	ENSCAFG00000010335-PVRL3	intergenic_region
1	BICF2P387293	93984526	A	G	0.39121	0.00563366	ERMP1-SPATA31E1	intergenic_region
28	BICF2S23253999	19085030	T	A	0.139912	0.00563882	SORCS1-U4	intergenic_region
35	BICF2P330952	11428274	G	A	0.12464	0.00564178	U6-HIVEP1	intergenic_region
6	BICF2G630572402	68926540	A	G	0.500722	0.0056451	FUBP1	intron_variant
4	TIGRP2P63464_rs8770552	55672489	A	G	0.483357	0.00565823	FAM114A2-GRIA1	intergenic_region
6	BICF2S23329890	14392873	G	A	0.248559	0.0056676	GNA12	intron_variant
5	BICF2P720245	12669075	G	A	0.301153	0.00566986	SORL1-SC5D	intergenic_region
7	BICF2P758526	25318558	G	C	0.440115	0.00569403	SERPINC1	upstream_gene_variant
26	BICF2P992425	34908229	A	G	0.443804	0.00569926	PCDH15-ENSCAFG00000015550	intergenic_region
28	BICF2G630269062	24794682	A	G	0.45389	0.0057053	NHLRC2-ADRB1	intergenic_region
14	BICF2S23117654	48841157	G	A	0.302594	0.00571548	ELMO1-GPR141	intergenic_region
6	BICF2G630570756	79178284	A	C	0.473266	0.0057315	0	0
9	BICF2G630834299	33895347	G	A	0.398415	0.0057351	YPEL2	intron_variant
3	BICF2G630340077	44543893	A	G	0.245677	0.00573692	NR2F2-ENSCAFG00000026734	intergenic_region
4	BICF2P83308	20010345	G	A	0.345599	0.00573911	STOX1	upstream_gene_variant
28	BICF2G630270313	23497732	A	G	0.0979827	0.00574149	ZDHHC6	upstream_gene_variant
17	BICF2S23757441	48459041	G	A	0.409222	0.00574592	U2-SEMA4F	intergenic_region
35	BICF2P784529	6016050	A	G	0.451009	0.0057519	FARS2-NRN1	intergenic_region
1	BICF2S23720329	29156678	G	A	0.445965	0.0057788	MAP3K5	intron_variant
11	BICF2P1253535	55248320	G	A	0.157781	0.0057976	ENSCAFG00000031489	synonymous_variant
26	BICF2G630799764	22237133	G	A	0.428674	0.00579801	ENSCAFG00000011954-ZNRF3	intergenic_region
9	BICF2S23017379	58938069	G	A	0.394813	0.00580236	DENND1A	intron_variant
16	BICF2P632977	27506251	A	G	0.476225	0.00580925	GOT1L1	intron_variant
37	BICF2P961555	24146036	G	A	0.24531	0.00582355	Pinc-ENSCAFG00000032371	intergenic_region
23	BICF2G630367403	49603786	G	A	0.486311	0.00582973	GMPS	intron_variant
12	BICF2P104860	32447914	G	A	0.167867	0.0058369	ENSCAFG00000002548	upstream_gene_variant
29	BICF2S2341391	18619219	A	G	0.294669	0.00584577	ENSCAFG00000007660-SULF1	intergenic_region
15	BICF2G630434649	30578070	G	A	0.178674	0.00585181	ATP2B1	intron_variant
33	BICF2P879471	15909680	G	A	0.129683	0.00585974	PVRL3	intron_variant
4	BICF2G630177258	86457147	A	G	0.309798	0.00587256	BASP1-FAM134B	intergenic_region
25	BICF2P1461096	49858895	C	G	0.208213	0.00587628	ROMO1-NDUFA10	intergenic_region
25	TIGRP2P328865_rs8709447	34874565	A	G	0.293948	0.0058828	SLC39A14	upstream_gene_variant
7	BICF2P1441020	18036740	A	G	0.12536	0.00589914	FAM129A	intron_variant
7	TIGRP2P91720_rs8552372	18044844	C	A	0.12536	0.00589914	FAM129A	intron_variant
20	BICF2P936439	37615435	A	G	0.186147	0.00589978	POC1A	intron_variant
5	BICF2P1331127	26933123	A	G	0.270132	0.00590014	GRIA4-CASP4	intergenic_region
12	BICF2P132258	36145500	A	C	0.28355	0.00590361	CD109-ENSCAFG00000002665	intergenic_region
20	BICF2P797395	36844754	A	C	0.0800866	0.00591192	RFT1-SFMBT1	intergenic_region
3	BICF2G630354004	87098004	G	A	0.121758	0.00591836	GBA3	intron_variant
21	BICF2G630659116	7365425	G	A	0.389769	0.00592501	CCDC67-SLC36A4	intergenic_region
21	BICF2G630659099	7373719	A	G	0.389769	0.00592501	CCDC67-SLC36A4	intergenic_region
23	BICF2P409179	39837652	A	G	0.178674	0.00593813	C3orf58-ENSCAFG00000008047	intergenic_region
6	BICF2G630570319	79661399	A	G	0.315562	0.00594261	0	0
3	BICF2G630338666	40892957	A	G	0.115994	0.00595534	ADAMTS17	intron_variant
1	BICF2S23746077	47388140	A	G	0.254323	0.00597485	SNX9	intron_variant
1	BICF2P127308	103514982	A	G	0.128963	0.00598717	ENSCAFG00000029928	upstream_gene_variant
1	BICF2P165361	103563716	G	A	0.128963	0.00598717	ENSCAFG00000002723	intron_variant
1	BICF2P496343	103644528	A	G	0.128963	0.00598717	cfa-mir-371-ENSCAFG00000030128	intergenic_region
35	TIGRP2P404552_rs8905682	4279116	G	A	0.386167	0.00599642	PRPF4B	intron_variant
22	BICF2G630326480	29466103	G	A	0.299265	0.0059984	LMO7	intron_variant
2	BICF2P20216	13139725	G	A	0.230548	0.00600712	U6-ENSCAFG00000032136	intergenic_region
26	BICF2G630803502	16814254	A	G	0.103746	0.00601043	HNF1	intron_variant
20	BICF2P492693	40866500	G	A	0.334776	0.00601314	ENSCAFG00000029616-MAP4	intergenic_region
38	BICF2S22931370	25898545	A	G	0.476945	0.00602123	0	0
4	BICF2P852817	53279941	G	A	0.422911	0.00604563	SGCD	intron_variant
35	TIGRP2P407860_rs8791075	18711639	G	A	0.498559	0.00604627	ID4-ENSCAFG00000031539	intergenic_region
1	BICF2G630720158	38384151	A	T	0.376801	0.00605621	STXBP5	intron_variant
1	BICF2G630720165	38389305	A	G	0.376801	0.00605621	STXBP5	intron_variant
17	BICF2P176834	56778467	A	C	0.28098	0.00606157	ENSCAFG00000030875	intron_variant
17	BICF2S23632368	20496172	C	G	0.2886	0.00607611	DRC1	intron_variant
30	BICF2P1400870	17434760	C	G	0.322511	0.00608967	LYSMD2-TMOD2	intergenic_region
5	BICF2S23346280	18487145	C	A	0.157287	0.00610021	CADM1-ENSCAFG00000026790	intergenic_region
1	TIGRP2P17898_rs9244221	27332052	G	A	0.152738	0.00610158	U6-ENSCAFG00000026990	intergenic_region
11	BICF2P815753	61414660	A	G	0.304755	0.00610206	FKTN	intron_variant
8	BICF2S23533219	22725138	C	A	0.313401	0.00611947	ENSCAFG00000014093-U6	intergenic_region
15	BICF2G630433442	32320032	A	T	0.365801	0.00612512	ENSCAFG00000006152-BTG1	intergenic_region
25	BICF2S22948336	23041247	G	A	0.401297	0.00612921	ENSCAFG00000007798	intron_variant
7	BICF2G63086496	81426621	A	T	0.0979827	0.00615691	0	0
38	BICF2G63066813	25757348	G	A	0.286744	0.00616747	0	0
11	BICF2P460649	49532805	G	A	0.325397	0.00617627	ENSCAFG00000001742-ACO1	intergenic_region
13	BICF2G630614121	24409046	C	A	0.433718	0.00617987	FAM84B-U6	intergenic_region
38	BICF2S23632352	18542570	C	A	0.280664	0.00619647	PBX1	intron_variant
19	BICF2S23740315	8653023	A	G	0.425793	0.00620987	ENSCAFG00000003779-ENSCAFG00000003785	intergenic_region
3	BICF2G630701035	15618558	G	A	0.320087	0.00623096	FAM172A	intron_variant
17	BICF2G630218870	15816594	A	G	0.074928	0.00623104	C2orf43-APOB	intergenic_region
26	BICF2S23355909	11363533	A	G	0.445965	0.0062527	RBM19-TBX5	intergenic_region
31	BICF2P630812	36062141	A	G	0.148415	0.00625529	ENSCAFG00000030700-RIPK4	intergenic_region
8	BICF2P17077	57199568	A	G	0.0533141	0.00626059	ENSCAFG00000017325-FLRT2	intergenic_region
21	BICF2G630659220	7276975	A	G	0.179395	0.00627912	CCDC67	intron_variant
34	BICF2G630451433	38496219	C	A	0.106628	0.00630039	NLGN1-7SK	intergenic_region
4	BICF2P836304	23091582	A	G	0.283141	0.00630177	MICU1	intron_variant
20	BICF2P897521	34012935	A	G	0.278098	0.00630385	ERC2	intron_variant
36	BICF2P1086980	6672215	G	A	0.182277	0.00630781	RBMS1-TANK	intergenic_region
3	BICF2G630705602	32584223	G	C	0.0914986	0.00630805	OCA2	intron_variant
38	BICF2S23126165	3017351	A	G	0.275937	0.00631026	ENSCAFG00000010290-U6	intergenic_region
8	BICF2P283228	19750279	G	A	0.074928	0.0063148	LRFN5-U6	intergenic_region
20	BICF2S23317599	9752207	A	G	0.115994	0.00632073	LMCD1-GRM7	intergenic_region
16	BICF2S23160052	19762270	A	G	0.074928	0.00632427	UBE3C-ENSCAFG00000005174	intergenic_region
6	TIGRP2P77653_rs9032601	11569936	G	A	0.329971	0.00633002	CYTH3	intron_variant
4	BICF2P36282	30849864	G	A	0.324207	0.00634377	SH2D4B-5S_rRNA	intergenic_region
13	BICF2G630604277	9876033	A	G	0.279539	0.00636601	NUDCD1	intron_variant
11	BICF2S2355132	72852967	A	G	0.113112	0.0063697	BRINP1-RPL7	intergenic_region
6	BICF2S23121085	28938587	A	G	0.48487	0.00638642	MKL2	intron_variant
25	BICF2G63094997	28660137	C	A	0.268421	0.00639117	HMBOX1-INTS9	intergenic_region
26	BICF2P1148613	25964045	G	A	0.235591	0.00639299	ENSCAFG00000030602-ENSCAFG00000032078	intergenic_region
1	BICF2P270859	25003827	A	G	0.335735	0.00639396	LDLRAD4-MOXD1	intergenic_region
26	BICF2S22911842	23967328	G	A	0.309078	0.0063978	MORC2	intron_variant
4	BICF2S23056008	53697581	A	G	0.308357	0.00640174	SGCD-ENSCAFG00000030235	intergenic_region
26	BICF2P30954	37170546	A	G	0.385281	0.00640275	ENSCAFG00000015602-U6	intergenic_region
15	BICF2P1339574	24628113	G	A	0.399856	0.00641663	TMTC2	upstream_gene_variant
8	BICF2P481494	72968861	G	A	0.353026	0.00643008	ENSCAFG00000030258	intron_variant
20	TIGRP2P273234_rs8866107	26918937	G	A	0.340058	0.00643026	PRICKLE2	intron_variant
14	BICF2G630528092	40601429	A	G	0.45671	0.00643416	ENSCAFG00000017837-ENSCAFG00000002977	intergenic_region
22	BICF2P583278	16377554	G	A	0.185159	0.00643943	ENSCAFG00000023746	intron_variant
34	BICF2P240887	24135600	A	G	0.435879	0.0064401	FGF12-MB21D2	intergenic_region
6	BICF2S2356387	45565916	C	A	0.231988	0.00644133	5S_rRNA-ENSCAFG00000028653	intergenic_region
33	BICF2S23448293	24337179	A	C	0.419308	0.0064472	STXBP5L	intron_variant
18	BICF2P1089908	24601562	A	C	0.287464	0.0064507	ENSCAFG00000031180	intron_variant
22	BICF2P751726	16337468	C	A	0.286744	0.00646439	DIAPH3-ENSCAFG00000023746	intergenic_region
35	BICF2G630775467	20851141	A	C	0.321376	0.00646439	PRL-5S_rRNA	intergenic_region
4	BICF2G630169242	76295434	A	G	0.0731884	0.00646487	ENSCAFG00000018956-U6	intergenic_region
24	TIGRP2P312094_rs8898534	19359678	A	G	0.270173	0.0064664	U6	upstream_gene_variant
16	BICF2G630113752	34765565	C	A	0.503602	0.00646823	ENSCAFG00000006566-ENSCAFG00000006574	intergenic_region
30	BICF2G630397694	38682133	C	A	0.465418	0.00648941	ODF3L1-LINGO1	intergenic_region
5	BICF2S23136398	20488146	C	A	0.298271	0.00651606	NCAM1-U4	intergenic_region
13	BICF2S2374162	58627957	A	G	0.0936599	0.00651656	TMPRSS11F-TMPRSS11B	intergenic_region
25	BICF2P333555	42440825	A	T	0.402738	0.00652252	SP110	intron_variant
21	BICF2P267640	11557751	A	G	0.334294	0.00652968	GRM5-ENSCAFG00000004384	intergenic_region
37	BICF2P1101412	20096814	A	C	0.309078	0.00653839	ERBB4-IKZF2	intergenic_region
7	BICF2S22910955	77719357	A	G	0.438865	0.00654577	CIDEA-TUBB6	intergenic_region
3	BICF2P462755	92618508	A	G	0.402738	0.00656858	0	0
20	BICF2P550967	54362981	A	G	0.221902	0.00659924	SAFB	intron_variant
21	BICF2P961274	11020874	C	A	0.460375	0.00662191	GRM5	intron_variant
18	BICF2S23355688	34183810	A	C	0.394813	0.00663412	KIAA1549L	intron_variant
34	BICF2P1438800	4124182	A	G	0.0814121	0.00664992	FAM173B-7SK	intergenic_region
34	BICF2P1441305	4131355	A	G	0.0814121	0.00664992	FAM173B-7SK	intergenic_region
34	BICF2G630461658	22506485	A	G	0.367435	0.00665336	TMEM207-IL1RAP	intergenic_region
33	BICF2P1117810	12380027	A	G	0.163295	0.00666137	CBLB-ENSCAFG00000027807	intergenic_region
6	BICF2P272179	28919275	A	G	0.469741	0.00666592	MKL2	intron_variant
6	BICF2P545493	28923498	G	A	0.469741	0.00666592	MKL2	intron_variant
6	BICF2P545494	28923516	A	G	0.469741	0.00666592	MKL2	intron_variant
6	BICF2P288170	28927711	A	G	0.469741	0.00666592	MKL2	intron_variant
16	BICF2P419232	39825583	A	G	0.180836	0.00667614	U6-ENSCAFG00000031006	intergenic_region
6	TIGRP2P77808_rs8624745	11984193	A	G	0.502161	0.00667716	ENSCAFG00000015816	intron_variant
7	BICF2P262369	48441148	C	A	0.347262	0.00669207	U6-ENSCAFG00000005666	intergenic_region
24	BICF2S23645926	37994765	G	A	0.373919	0.00669296	ENSCAFG00000011738-ENSCAFG00000029556	intergenic_region
20	BICF2G630233156	23820780	G	A	0.176856	0.00670472	ENSCAFG00000006583-SUCLG2	intergenic_region
38	BICF2G63065650	26708357	G	A	0.334055	0.00672153	0	0
4	BICF2P1018431	72004044	A	G	0.0881924	0.00673182	GLAST	intron_variant
18	TIGRP2P253389_rs8976010	46131406	G	A	0.422799	0.00673357	TNNT3	upstream_gene_variant
17	BICF2P1334806	66945762	G	A	0.152017	0.00673884	0	0
18	BICF2P573088	25324934	T	A	0.182997	0.00673885	SEPT14-SCGB1C1	intergenic_region
13	BICF2P852106	4218309	A	C	0.0952381	0.00674325	KLF10	synonymous_variant
2	BICF2G630677088	10603100	A	G	0.183718	0.00676854	ENSCAFG00000004186	intron_variant
19	BICF2S23622875	20541665	A	C	0.461095	0.00677272	AMER3-U6	intergenic_region
9	BICF2G630835711	37020059	A	T	0.426513	0.00677437	ACACA	intron_variant
9	BICF2G630835732	37035203	A	G	0.426513	0.00677437	ACACA	intron_variant
4	BICF2G63057670	7844211	G	A	0.29755	0.00678242	DISC1-ENSCAFG00000030982	intergenic_region
2	BICF2S23644479	74382174	G	A	0.209235	0.00678975	LDLRAP1-TMEM57	intergenic_region
22	BICF2G630321068	20431909	G	A	0.178674	0.00679424	ENSCAFG00000027940-U6	intergenic_region
15	BICF2G630435150	29521660	G	A	0.127522	0.00680761	TMTC3-KITLG	intergenic_region
24	BICF2G630508326	16162566	A	C	0.372478	0.00681094	GPCPD1	intron_variant
12	TIGRP2P159803_rs9007797	22418034	A	C	0.116162	0.00683098	FAM83B-U6	intergenic_region
8	BICF2S23327832	45347966	A	G	0.092219	0.00686458	SIPA1L1-RGS6	intergenic_region
5	BICF2P901531	13801889	G	A	0.111111	0.00687299	OAF-TRIM29	intergenic_region
14	BICF2G630523253	17062620	A	G	0.480519	0.00687889	FZD1-MTERF	intergenic_region
17	TIGRP2P233237_rs9002685	48938665	A	G	0.329251	0.0068874	BOLA3	upstream_gene_variant
11	BICF2P862026	58254418	A	G	0.146974	0.00689116	RNF20	intron_variant
30	BICF2P431530	31447878	G	A	0.0987032	0.00691338	IQCH	intron_variant
29	BICF2S23231264	25776594	A	G	0.46902	0.00692272	U6-ENSCAFG00000003489	intergenic_region
2	BICF2S23542440	56833656	A	G	0.2817	0.00693169	ARHGEF28-ENC1	intergenic_region
13	BICF2P1014054	42353912	A	G	0.26513	0.00694252	GABRG1-GABRA2	intergenic_region
20	BICF2G630233104	23666600	A	G	0.246398	0.00695199	ENSCAFG00000006583-SUCLG2	intergenic_region
12	TIGRP2P159752_rs8538234	22276674	C	A	0.278098	0.00696884	FAM83B	intron_variant
23	BICF2G630391772	9395717	G	A	0.185159	0.0069698	MYRIP	intron_variant
4	BICF2S23619899	70775755	C	A	0.206772	0.00698607	U6-GDNF	intergenic_region
16	BICF2P726769	41845896	A	G	0.128242	0.00698815	ENSCAFG00000028470-ENSCAFG00000028501	intergenic_region
14	BICF2P479412	21845026	G	A	0.337176	0.00699514	ENSCAFG00000002184-Evf1_1	intergenic_region
17	BICF2P115162	33902568	C	A	0.121212	0.00700059	EML4	intron_variant
5	BICF2S23212122	32486180	C	A	0.426407	0.0070212	SENP3	upstream_gene_variant
21	BICF2G630657124	12261978	A	T	0.31196	0.00702181	U6-TMEM135	intergenic_region
11	BICF2P1101477	36353483	G	A	0.481962	0.00702667	ENSCAFG00000032301-BNC2	intergenic_region
3	BICF2G630361729	93988514	T	A	0.139769	0.00703306	0	0
17	BICF2G630215525	27111794	C	A	0.0727666	0.00703717	FAM98A-ENSCAFG00000005880	intergenic_region
25	BICF2P932252	33680740	A	C	0.257225	0.00704755	U6-NKX2-6	intergenic_region
7	BICF2S2329066	8856066	A	G	0.403458	0.00705797	SERTAD4	upstream_gene_variant
15	BICF2P512996	20963421	C	A	0.157061	0.00705828	NAV3-ENSCAFG00000005762	intergenic_region
17	BICF2G630206000	47784758	C	A	0.439481	0.00707431	MRPL19-EVA1A	intergenic_region
16	BICF2P1091785	47711746	A	G	0.180115	0.00708279	TENM3	intron_variant
23	BICF2G630364122	52607541	A	C	0.180115	0.00708722	0	0
24	BICF2P628432	3451645	A	G	0.409222	0.00710647	RIN2	intron_variant
12	BICF2P869737	26475390	G	A	0.369597	0.00711035	ENSCAFG00000006053-LGSN	intergenic_region
3	BICF2S23761662	29149439	G	A	0.0799712	0.00711584	WDR41	intron_variant
26	BICF2G630797463	24426257	A	G	0.433718	0.00714197	SFI1	intron_variant
1	BICF2P1224350	68376222	A	C	0.04683	0.00714205	ARHGAP18-L3MBTL3	intergenic_region
34	BICF2G630455144	33034358	A	G	0.0864553	0.00714905	GOLIM4-ENSCAFG00000014605	intergenic_region
35	BICF2S23411269	19609894	A	G	0.149135	0.00715568	CDKAL1	intron_variant
4	TIGRP2P67500_rs8618100	87226646	C	A	0.0735931	0.00715924	MARCH11	intron_variant
28	BICF2P183309	28784949	A	G	0.0533141	0.00717589	FAM204A-PRLHR	intergenic_region
6	BICF2P439682	29459077	A	G	0.178211	0.00718719	ENSCAFG00000031194-ENSCAFG00000029951	intergenic_region
18	BICF2S2328870	22874440	A	G	0.134006	0.00718944	PCLO-SEMA3E	intergenic_region
2	BICF2P1198158	74413818	A	G	0.192363	0.00719156	TMEM57	intron_variant
25	BICF2P283247	42550271	G	A	0.458934	0.00719243	SP140-ENSCAFG00000010717	intergenic_region
12	BICF2P560555	17855857	C	A	0.103026	0.00720757	CBD111-7SK	intergenic_region
8	BICF2S23913443	44275476	A	G	0.139049	0.00722111	ADAM20-MED6	intergenic_region
21	BICF2G630657617	11532394	G	A	0.112392	0.00722266	GRM5-ENSCAFG00000004384	intergenic_region
4	BICF2P594596	32661632	A	G	0.0930736	0.00724049	CCSER2	intron_variant
30	BICF2S23351797	24941980	A	G	0.29683	0.00725732	FOXB1-ANXA2	intergenic_region
23	BICF2G630363119	53605497	A	G	0.380403	0.00727092	0	0
17	BICF2G630218695	15998903	G	A	0.315562	0.00727244	TDRD15	intron_variant
10	BICF2S23232095	70347403	G	A	0.362392	0.00728236	0	0
16	BICF2G630115238	37594687	A	G	0.146974	0.00728389	SGCZ	intron_variant
39	BICF2P637189	4582559	A	C	0.185879	0.00728851	0	0
7	BICF2P701615	32765899	G	A	0.0865801	0.0072905	RGS7-FH	intergenic_region
10	BICF2G630667553	15257061	A	G	0.169308	0.00729739	7SK-ATXN7L3B	intergenic_region
29	TIGRP2P366361_rs9127921	21801533	A	G	0.190922	0.0073003	ENSCAFG00000008012-U6	intergenic_region
3	TIGRP2P50626_rs8682637	71272924	G	A	0.0711176	0.00731864	JAKMIP1	intron_variant
18	BICF2P415900	26121674	A	C	0.386167	0.00732195	HSD17B12-cfa-mir-129-2	intergenic_region
28	BICF2P964985	11350718	G	A	0.289625	0.00733417	KCNQ1DN-R3HCC1L	intergenic_region
16	BICF2G630846862	17508979	G	A	0.334294	0.00733578	ENSCAFG00000005001-DPP6	intergenic_region
16	BICF2G630846875	17517692	A	G	0.334294	0.00733578	ENSCAFG00000005001-DPP6	intergenic_region
31	BICF2G630737882	27348165	A	G	0.199568	0.00736127	SYNJ1	intron_variant
6	BICF2S23112733	28902499	A	G	0.46902	0.00737291	cfa-mir-193b-MKL2	intergenic_region
23	BICF2P275539	30840515	C	G	0.272334	0.00739306	SLCO2A1	intron_variant
24	BICF2G630506039	18820076	A	G	0.471182	0.00740186	TGM3-STK35	intergenic_region
3	BICF2G630705409	32342708	A	G	0.426513	0.00741589	TUBGCP5	upstream_gene_variant
25	BICF2G630157937	52285112	G	A	0.444524	0.00741753	0	0
3	BICF2P228434	89218315	G	A	0.240634	0.00741776	SLIT2	intron_variant
12	BICF2P703899	22259226	A	C	0.302594	0.00745571	FAM83B	intron_variant
23	BICF2S23619360	45296344	A	G	0.397547	0.00745677	FAM194A	intron_variant
6	BICF2S23029673	11690964	G	A	0.201729	0.00746018	FAM220A	downstream_gene_variant
28	BICF2G630276489	11228621	G	A	0.309942	0.00746606	CRTAC1	upstream_gene_variant
14	BICF2P311030	44502729	G	A	0.476225	0.00746758	PDE1C	intron_variant
6	BICF2P637916	28933513	C	G	0.485591	0.00746846	MKL2	intron_variant
2	BICF2P292015	57202637	A	G	0.347262	0.00748989	ENC1-HEXB	intergenic_region
1	BICF2G630719841	37934337	C	G	0.362392	0.00749555	ADGB-ENSCAFG00000029107	intergenic_region
1	BICF2P591798	87539640	A	G	0.0663781	0.00749568	ENSCAFG00000028932-C9orf135	intergenic_region
5	G337f67S283	32457828	A	G	0.425793	0.00749673	POLR2A-TNFSF12	intergenic_region
5	BICF2S23049729	32498150	T	A	0.425793	0.00749673	SNORD10	upstream_gene_variant
3	BICF2P968952	50447243	A	G	0.2817	0.00750308	AGBL1-7SK	intergenic_region
6	BICF2S23028659	15522236	C	G	0.0497835	0.00751821	MICALL2-UNCX	intergenic_region
32	BICF2P454846	10830385	A	G	0.160663	0.00752506	SPARCL1	downstream_gene_variant
33	BICF2P1258516	16933149	G	A	0.414265	0.00753366	CD200-ENSCAFG00000010477	intergenic_region
9	BICF2P974723	52004352	A	G	0.113112	0.00754191	NTNG2	intron_variant
11	BICF2G630297820	27140083	G	A	0.334776	0.00756024	ENSCAFG00000031402-IL33	intergenic_region
8	BICF2P448232	49106564	A	G	0.120464	0.00757286	GPATCH2L	intron_variant
21	BICF2P1115878	18436209	C	A	0.216138	0.00757532	ENSCAFG00000004649-ENSCAFG00000030498	intergenic_region
25	BICF2G63097161	31767138	G	A	0.0959302	0.00757573	ENSCAFG00000007079	downstream_gene_variant
15	BICF2P108162	21009719	A	G	0.190922	0.00758334	NAV3-ENSCAFG00000005762	intergenic_region
21	BICF2G630650670	21623005	A	G	0.347983	0.00758617	CAPN5	downstream_gene_variant
4	BICF2P1286547	54662170	C	A	0.0972622	0.00759356	SGCD-ENSCAFG00000030235	intergenic_region
24	BICF2G630509899	14191665	A	G	0.487752	0.00759735	TMX4-HAO1	intergenic_region
4	BICF2P314918	37828274	A	G	0.189481	0.00759829	DRD1-MSX2	intergenic_region
8	BICF2P933821	56335370	A	G	0.104618	0.00761017	U6-ENSCAFG00000017323	intergenic_region
7	BICF2P1064539	77752276	A	G	0.424242	0.00761703	AFG3L2	intron_variant
9	BICF2P57249	48056026	G	A	0.183718	0.00763502	EHMT1	intron_variant
4	BICF2P1471441	17885586	A	G	0.31241	0.00763862	CTNNA3	intron_variant
4	BICF2P926170	17872562	A	G	0.290765	0.00764499	CTNNA3	intron_variant
29	BICF2G630631806	35300849	C	A	0.134921	0.0076462	RIPK2	intron_variant
6	BICF2P354986	11632379	C	A	0.469985	0.00765003	CYTH3-FAM220A	intergenic_region
5	BICF2P533881	63037190	A	G	0.152017	0.00766801	CLSTN1-CTNNBIP1	intergenic_region
32	BICF2G630591034	24519598	C	A	0.396974	0.00767513	CENPE	intron_variant
16	BICF2S23743305	13460785	A	G	0.157353	0.00767901	BPGM-ENSCAFG00000003164	intergenic_region
3	BICF2S23019370	62422987	G	A	0.250361	0.00768948	FAM53A	upstream_gene_variant
14	BICF2P809457	39751182	A	G	0.152738	0.00769833	SNX10-SKAP2	intergenic_region
8	BICF2P292946	37987082	G	A	0.221182	0.00774387	PPP2R5E	intron_variant
33	BICF2S23032	17629710	A	G	0.152017	0.00775301	BOC	downstream_gene_variant
30	BICF2G630409636	17642603	G	A	0.333333	0.00775998	LEO1	missense_variant
28	BICF2S23431929	38490901	A	G	0.251124	0.00776317	EBF3	3_prime_UTR_variant
26	BICF2G630798015	23815287	A	G	0.324207	0.00776429	OSBP2	intron_variant
15	TIGRP2P202351_rs9041104	48111659	G	A	0.12464	0.00777033	ENSCAFG00000007865-DCLK2	intergenic_region
7	BICF2P1007464	38727129	A	G	0.473343	0.00778689	ACBD3	intron_variant
31	BICF2G630732623	14536638	A	G	0.0972622	0.00779642	ENSCAFG00000008309-CHODL	intergenic_region
14	BICF2S23715556	49085738	A	G	0.456052	0.00779975	DNAJB9-SNORD116	intergenic_region
4	BICF2G630166744	38258702	A	G	0.479827	0.00779977	MSX2-ENSCAFG00000030421	intergenic_region
26	BICF2G630797994	23828402	A	G	0.148415	0.00784443	OSBP2	intron_variant
10	BICF2P622311	32598504	G	A	0.48415	0.00785328	NUAK1-U6	intergenic_region
7	BICF2P277135	28402269	A	G	0.101585	0.00787026	ENSCAFG00000015015-METTL11B	intergenic_region
8	BICF2P1102916	12817535	A	G	0.494957	0.00789273	NPAS3-EGLN3	intergenic_region
11	BICF2P1245581	41459716	A	G	0.347543	0.00791274	CDKN2B-AS-DMRTA1	intergenic_region
21	BICF2P943822	43369969	A	G	0.239914	0.00791747	NELL1	intron_variant
32	BICF2P1434267	10662145	G	A	0.433622	0.00793626	KLHL8	missense_variant
30	TIGRP2P372881_rs8585158	37322749	A	G	0.329957	0.0079412	ISLR	upstream_gene_variant
28	BICF2P423576	33052536	A	G	0.157781	0.00794582	BUB3-GPR26	intergenic_region
2	TIGRP2P20442_rs9011711	14878483	A	G	0.15873	0.00795594	KIF5B	3_prime_UTR_variant
14	BICF2G630525467	32365674	A	T	0.274496	0.00795988	SNX13-U6atac	intergenic_region
16	BICF2G630846845	17494478	A	G	0.258646	0.00796998	ENSCAFG00000005001-DPP6	intergenic_region
16	BICF2S23220747	14335577	A	G	0.260807	0.00797108	U6-7SK	intergenic_region
20	BICF2S23748153	44331745	A	G	0.144092	0.00798831	ENSCAFG00000014647	synonymous_variant
1	BICF2S23319232	54119750	C	A	0.490634	0.00799323	ENSCAFG00000023764-T	intergenic_region
4	BICF2P316701	63103531	A	G	0.446686	0.00800722	U2-U6	intergenic_region
5	BICF2P253481	75769665	A	G	0.0627706	0.00801467	WDR59	intron_variant
3	BICF2G630361960	94410234	G	A	0.216138	0.00801606	0	0
17	BICF2S2328557	13809098	G	A	0.473343	0.00801935	KCNS3-SNORD52	intergenic_region
13	BICF2G630746274	64564216	A	G	0.370851	0.00802324	0	0
6	TIGRP2P81425_rs9204625	35596059	G	A	0.185879	0.00803161	RBFOX1-ENSCAFG00000019087	intergenic_region
5	BICF2P209036	9014826	G	A	0.41342	0.00805723	FEZ1	intron_variant
27	BICF2P835642	33832115	G	A	0.463977	0.0080581	DUSP16	3_prime_UTR_variant
1	BICF2P740566	52419923	A	G	0.438761	0.0080666	QKI-HNRNPDL	intergenic_region
16	BICF2P1031521	13973653	C	A	0.056196	0.00807452	ENSCAFG00000032319	intron_variant
1	BICF2S23149839	104171523	A	G	0.233429	0.00807616	ENSCAFG00000032488-ENSCAFG00000028581	intergenic_region
21	BICF2G630658718	8074186	A	G	0.301153	0.00808335	FAT3	intron_variant
31	BICF2P858570	27186063	G	A	0.103026	0.00808437	EVA1C	intron_variant
5	BICF2P1260756	9003478	G	A	0.417147	0.00808568	FEZ1	intron_variant
5	BICF2P1260757	9003790	G	A	0.417147	0.00808568	FEZ1	intron_variant
11	BICF2S23336218	46838606	G	A	0.373199	0.00811608	ENSCAFG00000026571	upstream_gene_variant
30	BICF2G630408692	19849097	G	A	0.493516	0.00811625	UNC13C	intron_variant
29	BICF2S23147144	19080793	G	A	0.270173	0.00813264	SLCO5A1-VTI1B	intergenic_region
1	BICF2P818099	39021948	A	G	0.490634	0.00813532	7SK-U6	intergenic_region
33	BICF2S23452594	14864586	A	G	0.107349	0.00813883	ENSCAFG00000010335-PVRL3	intergenic_region
14	BICF2S23331706	22352515	A	C	0.245677	0.00814599	ENSCAFG00000031467-TAC1	intergenic_region
32	BICF2G630590039	25371099	G	A	0.347983	0.00815203	U6-CXXC4	intergenic_region
18	BICF2S23541745	50752014	A	G	0.291787	0.00815662	CCS	intron_variant
16	BICF2P356666	41998567	A	G	0.458213	0.00817299	ENSCAFG00000028470-ENSCAFG00000028501	intergenic_region
16	BICF2P742018	42015699	G	A	0.458213	0.00817299	ENSCAFG00000028470-ENSCAFG00000028501	intergenic_region
3	TIGRP2P55842_rs8846762	91037189	A	G	0.262968	0.00820299	ENSCAFG00000016664-ANAPC13	intergenic_region
8	TIGRP2P108864_rs8687421	21495885	A	G	0.0583573	0.00820725	LRFN5-U6	intergenic_region
26	BICF2S23548237	37095815	A	G	0.240634	0.00821236	A1CF	intron_variant
23	BICF2G630373038	37002314	G	A	0.151012	0.00822392	SPSB4	intron_variant
3	BICF2G630340922	45852748	G	A	0.32853	0.00823646	MCTP2	intron_variant
22	BICF2S22948628	16313035	G	C	0.373016	0.00824042	DIAPH3-ENSCAFG00000023746	intergenic_region
33	BICF2S23448789	12410046	A	G	0.257205	0.00825161	CBLB-ENSCAFG00000027807	intergenic_region
25	TIGRP2P324957_rs8555158	15127163	G	A	0.283862	0.00825441	TNFRSF19-SACS	intergenic_region
6	TIGRP2P85748_rs8641594	9074446	A	G	0.160663	0.0082553	TFR2	intron_variant
3	BICF2G630338265	40364793	G	A	0.157061	0.0082555	ASB7	downstream_gene_variant
3	TIGRP2P42176_rs9091206	40370979	A	G	0.157061	0.0082555	ASB7	intron_variant
35	BICF2P906653	20140208	A	G	0.369597	0.00826124	SOX4-PRL	intergenic_region
1	BICF2P1064029	122763071	A	G	0.407061	0.00826405	0	0
16	BICF2P1407329	30236817	A	G	0.461039	0.00827264	U6-DUSP26	intergenic_region
5	BICF2S23445477	8761953	G	A	0.405564	0.00827389	ENSCAFG00000023639-NEAT1_1	intergenic_region
13	BICF2S22953483	10562921	G	A	0.471182	0.00830656	KCNV1-U6	intergenic_region
15	BICF2P1123161	27698460	T	A	0.242795	0.00833273	MGAT4C-ENSCAFG00000031591	intergenic_region
22	BICF2G63090510	61518783	A	C	0.219741	0.0083377	0	0
4	BICF2P1271760	4775771	G	A	0.121934	0.00835569	RBM34	intron_variant
27	BICF2G630140001	7800706	A	G	0.434438	0.00837026	SLC38A4-SLC38A2	intergenic_region
18	G1003f33S61	6976604	G	A	0.0806916	0.00837835	HECW1	intron_variant
11	BICF2S23530197	73117674	G	A	0.128963	0.00838431	ENSCAFG00000003544-CDK5RAP2	intergenic_region
17	BICF2S23755075	56485980	A	G	0.165706	0.00839181	WARS2-HAO2	intergenic_region
2	BICF2S22958131	25096035	C	A	0.193084	0.00839515	CELF2	intron_variant
4	BICF2P317031	73314815	A	C	0.0583573	0.00841202	AGXT2	intron_variant
13	BICF2P448775	61574487	G	A	0.160663	0.00841596	ENSCAFG00000002956-ENSCAFG00000002959	intergenic_region
12	BICF2P1190796	24143513	A	G	0.172911	0.00842514	DST	intron_variant
20	BICF2P1297167	37232759	G	A	0.163781	0.00844802	PBRM1	downstream_gene_variant
15	BICF2G630444054	11765324	G	A	0.104985	0.00844851	ELAVL4-BEND5	intergenic_region
27	BICF2S22927985	4170470	A	G	0.480491	0.00845551	DIP2B	intron_variant
4	BICF2P342478	80006078	A	C	0.242424	0.00846849	ENSCAFG00000018980-7SK	intergenic_region
32	BICF2G630591921	23510329	A	C	0.0997046	0.00847586	BANK1	intron_variant
3	BICF2P518314	82275318	G	A	0.402017	0.00847861	ENSCAFG00000029510-5S_rRNA	intergenic_region
33	TIGRP2P386389_rs8712252	14692835	A	G	0.451009	0.00848271	ENSCAFG00000010335-PVRL3	intergenic_region
7	TIGRP2P93453_rs8676065	25773622	G	A	0.394092	0.00853636	PRDX6-TNFSF4	intergenic_region
31	BICF2P145206	17299401	A	G	0.208213	0.0085506	NCAM2	intron_variant
6	BICF2G630572926	68320274	A	G	0.290346	0.00855147	U6-IFI44	intergenic_region
11	BICF2P386071	55497603	C	A	0.45317	0.00855506	GABBR2	intron_variant
8	BICF2S23438122	9772943	G	A	0.371758	0.0085583	PRKD1-ENSCAFG00000012573	intergenic_region
29	BICF2S23523987	23450792	A	G	0.0691643	0.00857832	CRISPLD1-U6	intergenic_region
14	BICF2G630526375	35094956	C	G	0.110951	0.00859705	ABCB5-U6	intergenic_region
4	BICF2G630169890	77303192	G	A	0.163545	0.00860885	ENSCAFG00000018956-U6	intergenic_region
31	BICF2P282929	38673472	G	A	0.139769	0.00861339	FAM207A-ADARB1	intergenic_region
33	BICF2G63080793	20922978	G	A	0.0554755	0.00861759	BC040587-ENSCAFG00000001369	intergenic_region
9	BICF2G630473027	55841605	A	C	0.272727	0.00862033	FAM129B	intron_variant
33	TIGRP2P385894_rs9112226	12755495	A	G	0.0814121	0.00863384	CCDC54-BBX	intergenic_region
6	BICF2S23157686	71513929	A	G	0.39049	0.00863764	LHX8-TYW3	intergenic_region
8	BICF2P1420129	27241610	A	G	0.308357	0.00865004	PYGL	intron_variant
17	BICF2G630210682	35391234	A	G	0.258646	0.00865072	ACOXL	intron_variant
2	BICF2P9436	47679731	A	G	0.0756484	0.00865379	NDUFAF2	intron_variant
4	BICF2P984761	41273784	A	G	0.198127	0.00865654	KCNIP1	intron_variant
23	BICF2P195051	55103040	A	G	0.23415	0.00867103	0	0
1	BICF2P373354	24749705	C	A	0.114553	0.00868589	LDLRAD4	intron_variant
18	BICF2S23623282	11457993	G	A	0.0540346	0.00869052	ENSCAFG00000025443-ENSCAFG00000031742	intergenic_region
35	BICF2G630773102	12330486	A	G	0.332133	0.00870105	EDN1-ENSCAFG00000009809	intergenic_region
17	BICF2S23125149	20505739	C	A	0.367435	0.0087066	DRC1	intron_variant
3	BICF2P1331666	64978020	A	G	0.402738	0.00871142	C1QTNF7-CPEB2	intergenic_region
3	TIGRP2P51126_rs8638818	73025435	G	A	0.389049	0.0087144	KLB	intron_variant
3	BICF2G630706335	33592851	A	C	0.326369	0.00871442	ENSCAFG00000009974-GABRA5	intergenic_region
2	BICF2P1097685	84153457	G	A	0.414265	0.00871918	TNFRSF1B	upstream_gene_variant
33	BICF2P1440568	13224670	G	A	0.137155	0.00872191	BBX-CD47	intergenic_region
15	BICF2P548924	21618202	G	A	0.233429	0.00872398	ENSCAFG00000005762-SYT1	intergenic_region
3	TIGRP2P47184_rs8650949	59619158	G	A	0.221182	0.00873655	SORCS2	intron_variant
2	BICF2P557172	13529081	G	A	0.389049	0.0087431	U6-U6	intergenic_region
28	BICF2G630276981	7066414	A	G	0.230548	0.00875106	HHEX	downstream_gene_variant
38	TIGRP2P425207_rs8728709	25339449	G	A	0.146254	0.00881545	0	0
25	BICF2P601865	43076968	C	A	0.411383	0.0088178	PSMD1	intron_variant
11	BICF2S2447356	54221408	A	G	0.262248	0.00883008	SHB	intron_variant
33	TIGRP2P385978_rs9043558	13180915	A	C	0.484513	0.00883463	BBX-CD47	intergenic_region
3	TIGRP2P54115_rs9123739	85008634	G	A	0.229107	0.00883557	PI4K2B	upstream_gene_variant
35	BICF2S22937962	20126915	G	A	0.410534	0.00884774	SOX4-PRL	intergenic_region
5	TIGRP2P75235_rs8884972	85738342	C	A	0.295389	0.00885275	CDH11-CDH8	intergenic_region
23	TIGRP2P308737_rs8720126	52774042	C	A	0.254323	0.00886254	0	0
10	BICF2G630486196	38686708	G	A	0.0706052	0.00886367	POU3F3-ENSCAFG00000026741	intergenic_region
36	BICF2P497794	20899471	G	A	0.10951	0.00887936	MTX2-TUG1_1	intergenic_region
6	BICF2G630577939	51378480	C	A	0.0943804	0.00888588	5S_rRNA-cfa-mir-137	intergenic_region
16	BICF2P1158408	53975596	G	A	0.17219	0.00890653	ENSCAFG00000031506	upstream_gene_variant
4	BICF2P197533	20722557	C	A	0.154899	0.00891292	C10orf35-COL13A1	intergenic_region
22	BICF2S23414416	48587848	A	G	0.162824	0.00891397	STK24	intron_variant
2	BICF2G630673634	17481690	G	A	0.31196	0.00893636	BAMBI-ENSCAFG00000003936	intergenic_region
18	BICF2P1353640	26354621	A	C	0.136888	0.00896033	API5	intron_variant
20	TIGRP2P270428_rs9131267	14964086	A	G	0.351585	0.00896425	CNTN4-CNTN6	intergenic_region
27	BICF2G630139392	7024795	A	G	0.0590778	0.00898238	ENDOU	upstream_gene_variant
18	TIGRP2P239993_rs8560834	17756537	G	A	0.458874	0.00898569	U6	downstream_gene_variant
12	TIGRP2P160417_rs8853730	24609358	A	C	0.386888	0.00902602	PRIM2	intron_variant
1	BICF2S23715288	70431583	G	A	0.0569164	0.0090277	ENSCAFG00000001208-ZNF367	intergenic_region
1	BICF2P1291244	70469451	A	C	0.0569164	0.0090277	ZNF367	intron_variant
6	BICF2P241179	70542485	G	A	0.227666	0.00904483	ST6GALNAC3-ASB17	intergenic_region
12	BICF2P1083771	42669691	C	A	0.291787	0.00904662	IBTK	3_prime_UTR_variant
10	BICF2S2309846	62708929	C	A	0.270173	0.00905027	EHBP1	intron_variant
35	BICF2P417385	27532089	T	A	0.337176	0.00905059	0	0
20	BICF2P1446666	37175570	G	C	0.162338	0.0090513	PBRM1	intron_variant
8	BICF2S22936112	54788362	C	A	0.466089	0.00906218	5S_rRNA-5S_rRNA	intergenic_region
4	BICF2P1469250	19941806	A	G	0.117435	0.00906626	CCAR1	intron_variant
6	BICF2P182583	14448060	C	A	0.293948	0.00907261	GNA12	intron_variant
6	BICF2P915764	21737492	A	C	0.288184	0.0090775	CACNG3-PRKCB	intergenic_region
7	BICF2G630465252	4349453	A	G	0.232709	0.009083	PTPRC-ATP6V1G3	intergenic_region
18	BICF2P631156	8333065	A	G	0.450288	0.00908946	INHBA-ENSCAFG00000026807	intergenic_region
32	BICF2P431330	33302398	A	G	0.329251	0.00910208	CAMK2D	intron_variant
21	TIGRP2P286513_rs8639565	45797464	G	A	0.117647	0.00912209	UBE2D3-LUZP2	intergenic_region
34	BICF2P1217379	39460071	A	G	0.0951009	0.00913425	NAALADL2	intron_variant
14	BICF2S2345879	45484345	G	A	0.264409	0.00914949	BBS9	intron_variant
19	BICF2P924850	54257712	G	A	0.355908	0.00917621	0	0
24	BICF2G630496337	45908995	A	G	0.270893	0.00918345	ENSCAFG00000012668	intron_variant
38	BICF2P1250006	10833704	G	A	0.303314	0.00918677	ENSCAFG00000029859-KCTD3	intergenic_region
29	BICF2G630633896	38411036	A	C	0.146974	0.00918924	RUNX1T1-U6	intergenic_region
18	BICF2G630696670	40975057	A	G	0.231268	0.0092048	ENSCAFG00000029885-OR4C15	intergenic_region
24	BICF2P809314	45921984	A	G	0.213977	0.00922221	ENSCAFG00000012668	intron_variant
19	BICF2S23722686	38502295	G	A	0.0555556	0.00922658	R3HDM1	downstream_gene_variant
32	BICF2S23424494	33465329	A	G	0.15368	0.00922774	CAMK2D	intron_variant
13	BICF2P458350	42284475	A	G	0.45389	0.00922863	GABRG1-GABRA2	intergenic_region
24	BICF2S2357174	9463004	A	G	0.314841	0.00923618	SPTLC3	intron_variant
19	BICF2S23211263	47376628	A	C	0.12536	0.00926077	VIS1-U6	intergenic_region
11	BICF2P434950	10720693	C	A	0.211095	0.00927454	U6-ARL6IP1	intergenic_region
19	BICF2G63038402	17378819	G	A	0.139769	0.00928422	ENSCAFG00000003994	intron_variant
6	BICF2P884054	45100137	C	A	0.0628613	0.00928462	PRMT6-5S_rRNA	intergenic_region
37	BICF2P846455	26769365	A	G	0.0907781	0.00928576	SLC4A3-U6	intergenic_region
32	TIGRP2P379358_rs8488983	15512879	G	A	0.342939	0.00928627	ENSCAFG00000009965-ENSCAFG00000029672	intergenic_region
4	BICF2P1310841	85750874	G	A	0.213256	0.00929252	CDH18-SNORA62	intergenic_region
5	BICF2S23114666	18517129	G	A	0.26513	0.00929294	CADM1-ENSCAFG00000026790	intergenic_region
13	BICF2P603082	21267883	G	A	0.207493	0.00930259	U6-ZHX2	intergenic_region
17	BICF2G630215508	27129035	G	A	0.0670029	0.00930482	FAM98A-ENSCAFG00000005880	intergenic_region
25	BICF2S23524323	9483406	A	G	0.216138	0.00930934	HMGB1	intron_variant
35	BICF2P558483	18742471	G	A	0.449568	0.0093099	MBOAT1	intron_variant
29	BICF2S2314606	19100679	A	T	0.45389	0.00930994	SLCO5A1-VTI1B	intergenic_region
12	BICF2P711907	38249815	A	G	0.136888	0.00931438	ENSCAFG00000002777-U6	intergenic_region
14	BICF2G630519889	11721630	G	A	0.368156	0.00931717	SPAM1	intron_variant
20	BICF2P540783	26418923	G	A	0.268012	0.00931754	U4atac-ADAMTS9	intergenic_region
31	BICF2S23034278	35562466	A	C	0.153458	0.00931874	Y_RNA-U8	intergenic_region
20	BICF2S2339957	23565097	G	A	0.332853	0.00933	ENSCAFG00000006583-SUCLG2	intergenic_region
3	BICF2G630344656	63245413	A	G	0.349928	0.00933405	ACTB-LDB2	intergenic_region
20	BICF2P16562	39701869	A	G	0.362915	0.00934702	BSN-DAG1	intergenic_region
33	BICF2G630247982	11514370	A	G	0.407061	0.00935499	CBLB-ENSCAFG00000027807	intergenic_region
20	TIGRP2P278514_rs8821753	60336245	G	A	0.461095	0.00936052	0	0
1	BICF2G630720860	39537590	C	A	0.410663	0.00939037	SASH1-UST	intergenic_region
16	BICF2P1395240	37580455	C	G	0.136888	0.00939054	SGCZ	intron_variant
5	BICF2S235436	14444900	A	G	0.367452	0.00939662	ENSCAFG00000012017-U6	intergenic_region
32	BICF2G630592854	22682974	A	C	0.319164	0.00940362	5_8S_rRNA-PPP3CA	intergenic_region
15	BICF2G630434636	30593836	A	C	0.101585	0.00940943	ATP2B1	intron_variant
38	BICF2S23718897	19161476	A	G	0.054755	0.00943136	7SK-NUF2	intergenic_region
8	TIGRP2P115841_rs8992318	54954680	A	G	0.425072	0.00944002	5S_rRNA-U6	intergenic_region
6	BICF2P953174	56107661	A	G	0.365994	0.00944485	SNORD58-FAM69A	intergenic_region
23	BICF2P633164	20577579	A	G	0.260492	0.00944702	ENSCAFG00000032531-U6	intergenic_region
12	BICF2S241459	12531236	A	G	0.101879	0.00945857	MRPL14	downstream_gene_variant
1	BICF2G630715037	22510804	A	G	0.0979827	0.00945868	DCC-ENSCAFG00000030017	intergenic_region
16	BICF2P1004011	30224487	G	A	0.460375	0.00947238	U6-DUSP26	intergenic_region
7	BICF2P241357	25877934	A	C	0.167867	0.00947455	PRDX6-TNFSF4	intergenic_region
33	BICF2P466299	29463543	G	A	0.420635	0.00947916	UBXN7	intron_variant
9	BICF2G630473035	55847054	C	A	0.273055	0.00948379	FAM129B	intron_variant
21	BICF2G630655923	13697442	A	G	0.362392	0.00948463	SYTL2	intron_variant
6	BICF2S23130075	71519314	G	A	0.387446	0.00948955	LHX8-TYW3	intergenic_region
1	BICF2P795193	58584136	G	A	0.370665	0.00949867	PLN	upstream_gene_variant
1	BICF2P921315	70869349	G	A	0.227666	0.00950148	ERCC6L2	intron_variant
32	BICF2P962676	32136314	A	G	0.242075	0.00951216	TIFA	upstream_gene_variant
32	BICF2P962672	32136598	T	A	0.242075	0.00951216	TIFA	upstream_gene_variant
10	BICF2S22933661	62726601	A	C	0.17147	0.00951896	EHBP1	intron_variant
14	TIGRP2P188682_rs8702070	24220147	A	G	0.0648415	0.00952129	NXPH1	intron_variant
21	BICF2P241898	43365240	A	G	0.247839	0.0095271	NELL1	intron_variant
30	BICF2P602948	34694328	G	A	0.162824	0.00954227	LRRC49	intron_variant
26	TIGRP2P344406_rs9045784	37731710	C	A	0.345821	0.0095533	PAPSS2	intron_variant
31	BICF2G630738486	28114420	G	A	0.395533	0.00955504	ENSCAFG00000032434	downstream_gene_variant
23	BICF2P1350811	46380108	A	G	0.138329	0.00955825	AADAC-SUCNR1	intergenic_region
5	BICF2P1435673	12526871	A	G	0.0691643	0.00956058	SORL1	intron_variant
18	BICF2S23750902	37460953	A	G	0.126801	0.00956079	ENSCAFG00000031389-ENSCAFG00000015225	intergenic_region
6	BICF2G630582044	47896705	G	A	0.422688	0.00956099	COL11A1-OLFM3	intergenic_region
8	BICF2S22921872	18360664	C	A	0.348872	0.00956176	FBXO33-ENSCAFG00000008462	intergenic_region
20	BICF2S2336417	6290446	A	G	0.224063	0.00956834	NUCB1	upstream_gene_variant
32	BICF2S23149334	6940786	G	A	0.414986	0.00956926	LIN54	upstream_gene_variant
22	BICF2G63092897	63673012	A	G	0.0649351	0.00959308	0	0
5	BICF2G630241705	70694436	G	A	0.0619597	0.00961158	ENSCAFG00000020012	intron_variant
21	BICF2G630646340	30375145	A	G	0.471182	0.00962387	ENSCAFG00000032022-ENSCAFG00000030046	intergenic_region
9	BICF2G630473441	57672655	G	A	0.385281	0.00963005	MAPKAP1	intron_variant
21	BICF2P1273432	40560891	G	A	0.314121	0.00963321	TPH1	intron_variant
2	BICF2P86672	56971757	G	A	0.409222	0.00965018	ARHGEF28-ENC1	intergenic_region
36	BICF2G630759072	23864413	A	G	0.056196	0.00968436	CWC22-U6	intergenic_region
20	BICF2S23726023	44246884	A	G	0.143372	0.00968709	UPF1	intron_variant
20	BICF2S23150491	44312048	G	A	0.143372	0.00968709	COMP	missense_variant
38	BICF2G63072810	17708630	C	G	0.18804	0.00969934	MGST3-LRRC52	intergenic_region
26	BICF2S22941805	19558093	A	G	0.149135	0.00970718	MYO18B	intron_variant
6	TIGRP2P81753_rs9127078	37072166	A	G	0.458213	0.00971759	SRL	upstream_gene_variant
32	BICF2P221548	5914895	A	C	0.479827	0.00971784	U4-ENSCAFG00000008931	intergenic_region
23	BICF2S23437169	50607303	A	G	0.367244	0.00972382	ENSCAFG00000008882-CCNL1	intergenic_region
31	BICF2P696414	4052448	G	A	0.157061	0.00973023	ENSCAFG00000032194-ENSCAFG00000029014	intergenic_region
28	BICF2G630265488	35467679	G	A	0.407648	0.0097311	ADAM12	intron_variant
5	BICF2P103684	56184112	G	A	0.0907781	0.00973246	KLHL17	upstream_gene_variant
6	BICF2P537803	37148711	G	A	0.396104	0.00974353	SRL	upstream_gene_variant
2	BICF2G630675203	13553598	A	G	0.451729	0.00974656	U6-U6	intergenic_region
35	BICF2P259262	29137107	A	G	0.207071	0.00974973	0	0
7	BICF2S22957026	28159712	G	A	0.393939	0.00975327	PRRX1-GORAB	intergenic_region
14	BICF2S2341510	46727069	A	C	0.496398	0.00976065	DPY19L1	intron_variant
14	BICF2G630528742	41811219	A	G	0.092219	0.00976395	CREB5	intron_variant
21	BICF2P256038	41196725	A	T	0.179654	0.00977833	ENSCAFG00000009402	missense_variant
12	BICF2P949637	74140095	A	G	0.216138	0.00978443	0	0
26	BICF2S23020975	25410548	A	G	0.382353	0.00979532	ENSCAFG00000024720	intron_variant
15	BICF2P1412527	66011861	T	A	0.228592	0.00979651	0	0
19	BICF2P20015	10122581	G	A	0.283141	0.00979684	7SK-7SK	intergenic_region
15	BICF2P1295471	67059345	G	A	0.494949	0.00981811	0	0
18	BICF2P1260127	24593304	G	A	0.290346	0.00984087	ENSCAFG00000031180	intron_variant
31	BICF2S23661167	29396362	A	G	0.492795	0.0098473	ENSCAFG00000009541-MRPS6	intergenic_region
3	BICF2G630354859	88080183	A	C	0.0706052	0.00985143	GPR125-KCNIP4	intergenic_region
3	BICF2G630106591	36432197	G	A	0.192363	0.00986321	MKRN3-7SK	intergenic_region
18	BICF2G630696686	40964730	G	A	0.286744	0.00987163	ENSCAFG00000029885-OR4C15	intergenic_region
24	TIGRP2P315671_rs8490004	29917639	A	G	0.0721501	0.00988564	CHD6-PTPRT	intergenic_region
3	BICF2G630357407	90219273	G	A	0.0597983	0.00988666	RPL7A-ENSCAFG00000016642	intergenic_region
13	BICF2G630663123	34724578	A	C	0.422688	0.00990022	TRAPPC9	intron_variant
15	TIGRP2P198958_rs9132287	34608709	A	G	0.495677	0.00990044	CCDC41-TMCC3	intergenic_region
6	BICF2P158918	56109611	A	G	0.366522	0.00990529	SNORD58-FAM69A	intergenic_region
4	BICF2G630168069	74253446	G	A	0.141509	0.00992615	TARS-NPR3	intergenic_region
5	BICF2S22911048	18502362	A	G	0.151515	0.00993301	CADM1-ENSCAFG00000026790	intergenic_region
28	BICF2P1094360	16753726	G	A	0.0792507	0.00994081	CCDC147	3_prime_UTR_variant
1	TIGRP2P16671_rs9202034	21102932	A	C	0.0864553	0.00996418	C18orf54	intron_variant
